# Supplementary material
Source: publisher figshare collection journal article supplement (https://acs.figshare.com/ndownloader/files/4004383)
Supplement: Supplementary file 1 [file 4004383]

data_2012scas0005
_publ_requested_journal          Chem.-Eur.J.
_publ_contact_author_name        'Michael Laemmerhofer'
_publ_contact_author_address     
;Institute of Pharmaceutical Sciences
University of T\"ubingen

Auf der Morgenstelle 8
72076 T\"ubingen, Germany

;
_publ_contact_author_email       michael.laemmerhofer@uni-tuebingen.de
_publ_contact_author_phone       '+49 7071 29 78793'
_publ_contact_author_fax         '+49 7071 29 4565'
loop_
_publ_author_name
_publ_author_address
'Gargano, Andrea F.G.'
'Department of Analytical Chemistry, Univeristy of Vienna, Austria'
'Buchinger, Stefanie'
'Department of Analytical Chemistry, Univeristy of Vienna, Austria'
'Kohout, Michal'
'Department of Analytical Chemistry, Univeristy of Vienna, Austria'
'Lindner, Wolfgang'
'Department of Analytical Chemistry, Univeristy of Vienna, Austria'
'Laemmerhofer, Michael'
'Institute of Pharmaceutical Sciences, University of Tueubingen'
#AZ13676820
#GRADE B (Slightly high R1 & Rint due to thin crystals)
#Cell determined at 300K: 
#a = 9.504(37), b = 12.129(52), c = 13.321(55) 
#alp = 108.346(83), bet = 96.052(72), gam = 95.623(82)

_audit_creation_method           SHELXL-2012

loop_
_chemical_name_systematic      
'Methylhydrogen[2-({2-[(2,6-dimethylphenyl)amino]-2-oxo-1-phenylethyl}amino)pro'
'ane-2-yl]phosphonate'


_chemical_name_common            ?
_chemical_formula_moiety         'C20 H27 N2 O4 P, 2(C2 H6 O S)'
_chemical_formula_sum            'C24 H39 N2 O6 P S2'

_chemical_compound_source        
'University Of Vienna, Department of Analytical Chemistry'

_journal_coden_Cambridge         1078
_journal_year                    2013
_publ_requested_category         CO
_journal_name_full               'Private Communication '
_database_code_CSD               13SCAS0005
_database_code_depnum_ccdc_archive ?
_exptl_crystal_recrystallization_method DMSO
_chemical_melting_point          ?

_exptl_crystal_description       Platelet
_exptl_crystal_colour            Colourless

_diffrn_ambient_temperature      100(2)
_diffrn_ambient_pressure         101.325
_chemical_formula_weight         546.66

loop_
_atom_type_symbol
_atom_type_description
_atom_type_scat_dispersion_real
_atom_type_scat_dispersion_imag
_atom_type_scat_source
C C 0.0033 0.0016 'International Tables Vol C Tables 4.2.6.8 and 6.1.1.4'
H H 0.0000 0.0000 'International Tables Vol C Tables 4.2.6.8 and 6.1.1.4'
N N 0.0061 0.0033 'International Tables Vol C Tables 4.2.6.8 and 6.1.1.4'
O O 0.0106 0.0060 'International Tables Vol C Tables 4.2.6.8 and 6.1.1.4'
P P 0.1023 0.0942 'International Tables Vol C Tables 4.2.6.8 and 6.1.1.4'
S S 0.1246 0.1234 'International Tables Vol C Tables 4.2.6.8 and 6.1.1.4'

_space_group_crystal_system      triclinic
_space_group_IT_number           2
_space_group_name_H-M_alt        'P -1'
_space_group_name_Hall           '-P 1'

_shelx_space_group_comment       
;
The symmetry employed for this shelxl refinement is uniquely defined
by the following loop, which should always be used as a source of
symmetry information in preference to the above space-group names.
They are only intended as comments.
;

loop_
_space_group_symop_operation_xyz
'x, y, z'
'-x, -y, -z'

_cell_length_a                   9.373(3)
_cell_length_b                   12.019(4)
_cell_length_c                   13.078(4)
_cell_angle_alpha                108.637(5)
_cell_angle_beta                 95.801(6)
_cell_angle_gamma                95.605(4)
_cell_volume                     1375.7(7)
_cell_formula_units_Z            2
_cell_measurement_temperature    100(2)
_cell_measurement_reflns_used    3783
_cell_measurement_theta_min      3.0
_cell_measurement_theta_max      34.6
_exptl_crystal_density_meas      ?
_exptl_crystal_density_method    ?
_exptl_crystal_density_diffrn    1.320
_exptl_crystal_F_000             584
_exptl_transmission_factor_min   ?
_exptl_transmission_factor_max   ?
_exptl_crystal_size_max          0.100
_exptl_crystal_size_mid          0.030
_exptl_crystal_size_min          0.010
_exptl_absorpt_coefficient_mu    0.292
_shelx_estimated_absorpt_T_min    0.971
_shelx_estimated_absorpt_T_max    0.997
_exptl_absorpt_correction_type   multi-scan
_exptl_absorpt_correction_T_max  1.000
_exptl_absorpt_correction_T_min  0.821
_exptl_absorpt_process_details   
;
Jacobson, R. (1998). REQAB. Private communication to the 
Rigaku Corporation, Tokyo, Japan.
;

_exptl_special_details           
;
 ?
;
_diffrn_source_power             2.475
_diffrn_source_voltage           45.0
_diffrn_source_current           55.0
_diffrn_radiation_probe          x-ray
_diffrn_radiation_type           ?

_diffrn_radiation_wavelength     0.71073
_diffrn_source                   'Rotating Anode'
_diffrn_source_type              'FR-E+ SuperBright '
_diffrn_radiation_collimation    'Confocal mirrors, VHF Varimax '

_diffrn_detector                 'CCD plate'
_diffrn_detector_type            'Rigaku HG Saturn724+ (2x2 bin mode)'
_diffrn_detector_area_resol_mean 28.5714

_diffrn_measurement_device       'four-circle \k diffractometer'
_diffrn_measurement_device_type  'Rigaku AFC12 (Right)'
_diffrn_measurement_method       'profile data from \w-scans'
_diffrn_measurement_specimen_support 'MiTeGen MicroMesh'
_diffrn_reflns_number            20014
_diffrn_reflns_av_unetI/netI     0.0955
_diffrn_reflns_av_R_equivalents  0.0820
_diffrn_reflns_limit_h_min       -11
_diffrn_reflns_limit_h_max       11
_diffrn_reflns_limit_k_min       -15
_diffrn_reflns_limit_k_max       15
_diffrn_reflns_limit_l_min       -16
_diffrn_reflns_limit_l_max       16
_diffrn_reflns_theta_min         2.969
_diffrn_reflns_theta_max         26.371
_diffrn_reflns_theta_full        25.242
_diffrn_measured_fraction_theta_max 0.998
_diffrn_measured_fraction_theta_full 0.997
_diffrn_reflns_Laue_measured_fraction_max 0.998
_diffrn_reflns_Laue_measured_fraction_full 0.997
_diffrn_reflns_point_group_measured_fraction_max 0.998
_diffrn_reflns_point_group_measured_fraction_full 0.997
_reflns_number_total             5617
_reflns_number_gt                4025
_reflns_threshold_expression     'I > 2\s(I)'
_reflns_Friedel_coverage         0.000

_reflns_special_details          
;
 Reflections were merged by SHELXL according to the crystal
 class for the calculation of statistics and refinement.
 
 _reflns_Friedel_fraction is defined as the number of unique
 Friedel pairs measured divided by the number that would be
 possible theoretically, ignoring centric projections and
 systematic absences.
;

_computing_data_collection       
;
CrystalClear-SM Expert 2.0 r7 (Rigaku, 2011)
;
_computing_cell_refinement       
;
CrystalClear-SM Expert 2.0 r7 (Rigaku, 2011)
;
_computing_data_reduction        
;
CrystalClear-SM Expert 2.0 r7 (Rigaku, 2011)
;
_computing_structure_solution    'SHELXS-97 (Sheldrick, 1997)'
_computing_structure_refinement  'SHELXL-2012 (Sheldrick, 2012)'
_computing_molecular_graphics    
;
Images generated using CrystalMaker: a crystal and molecular 
structures program for Mac and Windows. CrystalMaker Software Ltd, 
Oxford, England (www.crystalmaker.com)
;
_computing_publication_material  'WINGX (Farrugia, 1998)'

_refine_special_details          
;
All hydrogen atoms were clearly identified in the difference map, 
C-H were then placed in calculated positions and refined using a 
riding model, N-H were freely refined.
;

_refine_ls_structure_factor_coef Fsqd
_refine_ls_matrix_type           full
_refine_ls_weighting_scheme      calc
_refine_ls_weighting_details     
;
 w=1/[\s^2^(Fo^2^)+(0.0356P)^2^+0.7477P]
 where P=(Fo^2^+2Fc^2^)/3
;
_atom_sites_solution_primary     ?
_atom_sites_solution_secondary   ?
_atom_sites_solution_hydrogens   mixed
_refine_ls_hydrogen_treatment    mixed
_refine_ls_extinction_method     none
_refine_ls_extinction_coef       .
_refine_ls_number_reflns         5617
_refine_ls_number_parameters     337
_refine_ls_number_restraints     0
_refine_ls_R_factor_all          0.1056
_refine_ls_R_factor_gt           0.0691
_refine_ls_wR_factor_ref         0.1320
_refine_ls_wR_factor_gt          0.1179
_refine_ls_goodness_of_fit_ref   1.093
_refine_ls_restrained_S_all      1.093
_refine_ls_shift/su_max          0.013
_refine_ls_shift/su_mean         0.002

loop_
_atom_site_label
_atom_site_type_symbol
_atom_site_fract_x
_atom_site_fract_y
_atom_site_fract_z
_atom_site_U_iso_or_equiv
_atom_site_adp_type
_atom_site_occupancy
_atom_site_site_symmetry_order
_atom_site_calc_flag
_atom_site_refinement_flags_posn
_atom_site_refinement_flags_adp
_atom_site_refinement_flags_occupancy
_atom_site_disorder_assembly
_atom_site_disorder_group
P1 P -0.01192(10) 0.24407(8) 1.19521(7) 0.0188(2) Uani 1 1 d . . . . .
O1 O -0.2050(2) 0.21936(18) 0.81129(17) 0.0210(5) Uani 1 1 d . . . . .
O2 O -0.0016(2) 0.11573(18) 1.13977(17) 0.0191(5) Uani 1 1 d . . . . .
O3 O 0.1221(2) 0.3306(2) 1.23949(19) 0.0278(6) Uani 1 1 d . . . . .
O4 O -0.1097(3) 0.2567(2) 1.29169(18) 0.0264(6) Uani 1 1 d . . . . .
N1 N -0.1484(3) 0.0318(2) 0.7771(2) 0.0186(7) Uani 1 1 d . . . . .
H1A H -0.104(4) -0.012(3) 0.801(3) 0.022(10) Uiso 1 1 d . . . . .
N2 N -0.0427(3) 0.3058(2) 1.0092(2) 0.0169(6) Uani 1 1 d . . . . .
H1B H 0.047(4) 0.359(3) 1.036(3) 0.049(12) Uiso 1 1 d . . . . .
H1C H -0.098(4) 0.340(3) 0.970(3) 0.021(9) Uiso 1 1 d . . . . .
C1 C -0.2156(4) 0.0122(3) 0.5845(3) 0.0214(8) Uani 1 1 d . . . . .
C2 C -0.3085(4) -0.0432(3) 0.4868(3) 0.0264(8) Uani 1 1 d . . . . .
H2 H -0.2922 -0.0223 0.4243 0.032 Uiso 1 1 calc R U . . .
C3 C -0.4235(4) -0.1278(3) 0.4793(3) 0.0293(9) Uani 1 1 d . . . . .
H3 H -0.4861 -0.1638 0.4124 0.035 Uiso 1 1 calc R U . . .
C4 C -0.4475(4) -0.1601(3) 0.5694(3) 0.0273(9) Uani 1 1 d . . . . .
H4 H -0.5260 -0.2193 0.5631 0.033 Uiso 1 1 calc R U . . .
C5 C -0.3581(4) -0.1073(3) 0.6696(3) 0.0218(8) Uani 1 1 d . . . . .
C6 C -0.2428(3) -0.0212(3) 0.6751(3) 0.0173(7) Uani 1 1 d . . . . .
C7 C -0.0907(4) 0.1035(3) 0.5907(3) 0.0262(8) Uani 1 1 d . . . . .
H7A H -0.0679 0.0940 0.5171 0.039 Uiso 1 1 calc R U . . .
H7B H -0.0061 0.0932 0.6355 0.039 Uiso 1 1 calc R U . . .
H7C H -0.1168 0.1830 0.6234 0.039 Uiso 1 1 calc R U . . .
C8 C -0.3838(4) -0.1442(3) 0.7673(3) 0.0279(9) Uani 1 1 d . . . . .
H8A H -0.3973 -0.0747 0.8279 0.042 Uiso 1 1 calc R U . . .
H8B H -0.3001 -0.1786 0.7889 0.042 Uiso 1 1 calc R U . . .
H8C H -0.4706 -0.2031 0.7483 0.042 Uiso 1 1 calc R U . . .
C9 C -0.1336(4) 0.1477(3) 0.8342(3) 0.0179(7) Uani 1 1 d . . . . .
C10 C -0.0142(3) 0.1880(3) 0.9337(3) 0.0175(7) Uani 1 1 d . . . . .
H10 H -0.0207 0.1287 0.9726 0.021 Uiso 1 1 calc R U . . .
C11 C 0.1345(4) 0.1957(3) 0.8979(3) 0.0184(7) Uani 1 1 d . . . . .
C12 C 0.1718(4) 0.2656(3) 0.8350(3) 0.0231(8) Uani 1 1 d . . . . .
H12 H 0.1046 0.3127 0.8165 0.028 Uiso 1 1 calc R U . . .
C13 C 0.3062(4) 0.2668(3) 0.7994(3) 0.0267(9) Uani 1 1 d . . . . .
H13 H 0.3316 0.3154 0.7575 0.032 Uiso 1 1 calc R U . . .
C14 C 0.4036(4) 0.1966(3) 0.8251(3) 0.0308(9) Uani 1 1 d . . . . .
H14 H 0.4950 0.1959 0.7996 0.037 Uiso 1 1 calc R U . . .
C15 C 0.3670(4) 0.1273(3) 0.8881(3) 0.0294(9) Uani 1 1 d . . . . .
H15 H 0.4340 0.0800 0.9065 0.035 Uiso 1 1 calc R U . . .
C16 C 0.2327(4) 0.1269(3) 0.9244(3) 0.0220(8) Uani 1 1 d . . . . .
H16 H 0.2082 0.0794 0.9675 0.026 Uiso 1 1 calc R U . . .
C17 C -0.1272(4) 0.2998(3) 1.1032(3) 0.0179(7) Uani 1 1 d . . . . .
C18 C -0.1488(4) 0.4273(3) 1.1625(3) 0.0232(8) Uani 1 1 d . . . . .
H18A H -0.2041 0.4577 1.1120 0.035 Uiso 1 1 calc R U . . .
H18B H -0.0543 0.4764 1.1898 0.035 Uiso 1 1 calc R U . . .
H18C H -0.2020 0.4297 1.2238 0.035 Uiso 1 1 calc R U . . .
C19 C -0.2720(3) 0.2215(3) 1.0557(3) 0.0223(8) Uani 1 1 d . . . . .
H19A H -0.3301 0.2239 1.1144 0.033 Uiso 1 1 calc R U . . .
H19B H -0.2554 0.1398 1.0197 0.033 Uiso 1 1 calc R U . . .
H19C H -0.3237 0.2505 1.0025 0.033 Uiso 1 1 calc R U . . .
C20 C -0.1860(4) 0.1549(3) 1.3076(3) 0.0345(10) Uani 1 1 d . . . . .
H20A H -0.2724 0.1242 1.2528 0.052 Uiso 1 1 calc R U . . .
H20B H -0.2149 0.1780 1.3806 0.052 Uiso 1 1 calc R U . . .
H20C H -0.1227 0.0934 1.3001 0.052 Uiso 1 1 calc R U . . .
S1 S -0.32363(9) 0.45767(7) 0.87259(7) 0.0207(2) Uani 1 1 d . . . . .
O5 O -0.1701(2) 0.49675(19) 0.93338(17) 0.0213(5) Uani 1 1 d . . . . .
C21 C -0.3078(4) 0.4195(3) 0.7319(3) 0.0245(8) Uani 1 1 d . . . . .
H21A H -0.2447 0.4828 0.7199 0.037 Uiso 1 1 calc R U . . .
H21B H -0.4038 0.4093 0.6901 0.037 Uiso 1 1 calc R U . . .
H21C H -0.2661 0.3453 0.7080 0.037 Uiso 1 1 calc R U . . .
C22 C -0.4025(4) 0.5899(3) 0.8851(3) 0.0285(9) Uani 1 1 d . . . . .
H22A H -0.4148 0.6285 0.9613 0.043 Uiso 1 1 calc R U . . .
H22B H -0.4971 0.5700 0.8394 0.043 Uiso 1 1 calc R U . . .
H22C H -0.3389 0.6438 0.8615 0.043 Uiso 1 1 calc R U . . .
S2 S -0.69460(11) 0.41891(9) 0.52569(8) 0.0333(3) Uani 1 1 d . . . . .
O6 O -0.6257(3) 0.4632(2) 0.6429(2) 0.0444(8) Uani 1 1 d . . . . .
C23 C -0.7843(5) 0.5339(3) 0.5052(3) 0.0411(11) Uani 1 1 d . . . . .
H23A H -0.8412 0.5637 0.5646 0.062 Uiso 1 1 calc R U . . .
H23B H -0.8488 0.5035 0.4356 0.062 Uiso 1 1 calc R U . . .
H23C H -0.7127 0.5984 0.5040 0.062 Uiso 1 1 calc R U . . .
C24 C -0.8531(4) 0.3214(3) 0.5200(3) 0.0370(10) Uani 1 1 d . . . . .
H24A H -0.8253 0.2502 0.5333 0.055 Uiso 1 1 calc R U . . .
H24B H -0.9106 0.2989 0.4478 0.055 Uiso 1 1 calc R U . . .
H24C H -0.9107 0.3614 0.5757 0.055 Uiso 1 1 calc R U . . .

loop_
_atom_site_aniso_label
_atom_site_aniso_U_11
_atom_site_aniso_U_22
_atom_site_aniso_U_33
_atom_site_aniso_U_23
_atom_site_aniso_U_13
_atom_site_aniso_U_12
P1 0.0208(5) 0.0183(5) 0.0189(5) 0.0077(4) 0.0011(4) 0.0059(4)
O1 0.0226(13) 0.0162(12) 0.0241(13) 0.0062(10) -0.0002(11) 0.0065(10)
O2 0.0237(13) 0.0158(12) 0.0200(12) 0.0074(10) 0.0030(10) 0.0080(10)
O3 0.0253(14) 0.0252(14) 0.0324(14) 0.0132(11) -0.0066(11) -0.0007(11)
O4 0.0361(15) 0.0234(13) 0.0248(13) 0.0106(11) 0.0132(12) 0.0103(11)
N1 0.0194(17) 0.0167(15) 0.0207(16) 0.0077(12) -0.0009(13) 0.0057(13)
N2 0.0173(16) 0.0158(15) 0.0181(15) 0.0071(12) -0.0005(13) 0.0033(13)
C1 0.024(2) 0.0181(18) 0.0216(18) 0.0046(14) 0.0037(15) 0.0059(15)
C2 0.032(2) 0.024(2) 0.0235(19) 0.0074(15) 0.0023(17) 0.0074(17)
C3 0.028(2) 0.026(2) 0.026(2) -0.0003(16) -0.0020(17) 0.0082(17)
C4 0.017(2) 0.0187(19) 0.040(2) 0.0029(16) -0.0004(17) 0.0032(15)
C5 0.0165(19) 0.0182(18) 0.031(2) 0.0082(15) 0.0047(16) 0.0045(15)
C6 0.0148(18) 0.0133(17) 0.0211(18) 0.0016(14) -0.0009(14) 0.0056(14)
C7 0.034(2) 0.0233(19) 0.0231(19) 0.0092(15) 0.0065(17) 0.0052(17)
C8 0.021(2) 0.024(2) 0.039(2) 0.0110(17) 0.0059(17) 0.0016(16)
C9 0.0163(18) 0.0199(18) 0.0197(18) 0.0079(14) 0.0057(14) 0.0047(15)
C10 0.0181(19) 0.0149(17) 0.0195(18) 0.0051(14) 0.0024(14) 0.0048(14)
C11 0.0155(18) 0.0165(17) 0.0187(17) -0.0002(14) 0.0012(14) 0.0026(14)
C12 0.021(2) 0.0233(19) 0.0225(19) 0.0062(15) -0.0024(16) 0.0012(16)
C13 0.023(2) 0.029(2) 0.0229(19) 0.0063(16) -0.0014(16) -0.0070(17)
C14 0.020(2) 0.032(2) 0.029(2) -0.0046(17) 0.0059(17) -0.0032(17)
C15 0.020(2) 0.0185(19) 0.043(2) 0.0004(17) -0.0008(18) 0.0068(16)
C16 0.019(2) 0.0152(18) 0.029(2) 0.0034(15) 0.0017(16) 0.0023(15)
C17 0.0180(18) 0.0192(18) 0.0185(17) 0.0075(14) 0.0052(14) 0.0052(15)
C18 0.029(2) 0.0217(19) 0.0227(19) 0.0085(15) 0.0083(16) 0.0114(16)
C19 0.0180(19) 0.0262(19) 0.0248(19) 0.0102(15) 0.0044(15) 0.0057(16)
C20 0.035(2) 0.036(2) 0.035(2) 0.0136(18) 0.0127(19) 0.0034(19)
S1 0.0180(5) 0.0187(5) 0.0238(5) 0.0064(4) -0.0012(4) 0.0014(4)
O5 0.0164(13) 0.0208(13) 0.0248(13) 0.0084(10) -0.0048(10) -0.0015(10)
C21 0.028(2) 0.0201(19) 0.0236(19) 0.0053(15) 0.0000(16) 0.0050(16)
C22 0.024(2) 0.0192(19) 0.036(2) 0.0023(16) -0.0048(17) 0.0094(16)
S2 0.0314(6) 0.0315(6) 0.0353(6) 0.0087(4) 0.0036(5) 0.0062(5)
O6 0.0333(17) 0.0556(19) 0.0369(16) 0.0118(14) -0.0133(14) 0.0023(14)
C23 0.055(3) 0.032(2) 0.037(2) 0.0096(19) 0.012(2) 0.011(2)
C24 0.034(2) 0.034(2) 0.041(2) 0.0133(19) -0.0046(19) 0.0039(19)

_geom_special_details            
;
 All esds (except the esd in the dihedral angle between two l.s. planes)
 are estimated using the full covariance matrix.  The cell esds are taken
 into account individually in the estimation of esds in distances, angles
 and torsion angles; correlations between esds in cell parameters are only
 used when they are defined by crystal symmetry.  An approximate (isotropic)
 treatment of cell esds is used for estimating esds involving l.s. planes.
;

loop_
_geom_bond_atom_site_label_1
_geom_bond_atom_site_label_2
_geom_bond_distance
_geom_bond_site_symmetry_2
_geom_bond_publ_flag
P1 O3 1.486(2) . ?
P1 O2 1.498(2) . ?
P1 O4 1.610(2) . ?
P1 C17 1.859(3) . ?
O1 C9 1.232(4) . ?
O4 C20 1.440(4) . ?
N1 C9 1.339(4) . ?
N1 C6 1.440(4) . ?
N2 C10 1.512(4) . ?
N2 C17 1.545(4) . ?
C1 C2 1.398(4) . ?
C1 C6 1.406(4) . ?
C1 C7 1.501(5) . ?
C2 C3 1.380(5) . ?
C3 C4 1.385(5) . ?
C4 C5 1.402(5) . ?
C5 C6 1.400(4) . ?
C5 C8 1.513(5) . ?
C9 C10 1.542(4) . ?
C10 C11 1.518(4) . ?
C11 C16 1.385(4) . ?
C11 C12 1.396(5) . ?
C12 C13 1.388(5) . ?
C13 C14 1.388(5) . ?
C14 C15 1.389(5) . ?
C15 C16 1.389(5) . ?
C17 C19 1.523(4) . ?
C17 C18 1.525(4) . ?
S1 O5 1.524(2) . ?
S1 C21 1.774(3) . ?
S1 C22 1.785(3) . ?
S2 O6 1.504(3) . ?
S2 C23 1.763(4) . ?
S2 C24 1.780(4) . ?

loop_
_geom_angle_atom_site_label_1
_geom_angle_atom_site_label_2
_geom_angle_atom_site_label_3
_geom_angle
_geom_angle_site_symmetry_1
_geom_angle_site_symmetry_3
_geom_angle_publ_flag
O3 P1 O2 119.94(14) . . ?
O3 P1 O4 108.07(14) . . ?
O2 P1 O4 109.36(13) . . ?
O3 P1 C17 107.67(14) . . ?
O2 P1 C17 109.70(14) . . ?
O4 P1 C17 100.32(14) . . ?
C20 O4 P1 122.0(2) . . ?
C9 N1 C6 122.9(3) . . ?
C10 N2 C17 115.6(2) . . ?
C2 C1 C6 117.8(3) . . ?
C2 C1 C7 120.3(3) . . ?
C6 C1 C7 121.9(3) . . ?
C3 C2 C1 121.2(3) . . ?
C2 C3 C4 120.0(3) . . ?
C3 C4 C5 121.3(3) . . ?
C6 C5 C4 117.6(3) . . ?
C6 C5 C8 121.4(3) . . ?
C4 C5 C8 121.0(3) . . ?
C5 C6 C1 122.1(3) . . ?
C5 C6 N1 118.1(3) . . ?
C1 C6 N1 119.8(3) . . ?
O1 C9 N1 125.0(3) . . ?
O1 C9 C10 120.8(3) . . ?
N1 C9 C10 114.2(3) . . ?
N2 C10 C11 112.1(3) . . ?
N2 C10 C9 107.7(3) . . ?
C11 C10 C9 110.6(3) . . ?
C16 C11 C12 119.5(3) . . ?
C16 C11 C10 118.7(3) . . ?
C12 C11 C10 121.8(3) . . ?
C13 C12 C11 120.5(3) . . ?
C12 C13 C14 119.8(3) . . ?
C13 C14 C15 119.8(4) . . ?
C16 C15 C14 120.3(3) . . ?
C11 C16 C15 120.1(3) . . ?
C19 C17 C18 111.0(3) . . ?
C19 C17 N2 109.2(3) . . ?
C18 C17 N2 105.3(2) . . ?
C19 C17 P1 113.1(2) . . ?
C18 C17 P1 110.0(2) . . ?
N2 C17 P1 107.9(2) . . ?
O5 S1 C21 106.30(15) . . ?
O5 S1 C22 106.43(14) . . ?
C21 S1 C22 96.86(17) . . ?
O6 S2 C23 106.31(18) . . ?
O6 S2 C24 105.72(18) . . ?
C23 S2 C24 96.59(19) . . ?

loop_
_geom_hbond_atom_site_label_D
_geom_hbond_atom_site_label_H
_geom_hbond_atom_site_label_A
_geom_hbond_distance_DH
_geom_hbond_distance_HA
_geom_hbond_distance_DA
_geom_hbond_angle_DHA
_geom_hbond_site_symmetry_A
N1 H1A O2 0.81(3) 1.96(3) 2.778(4) 179(4) 2_557
N2 H1B O5 0.96(4) 1.89(4) 2.794(4) 155(3) 2_567
N2 H1C O1 0.91(3) 2.18(3) 2.696(4) 115(2) .
N2 H1C O5 0.91(3) 2.23(3) 3.070(3) 153(3) .

_refine_diff_density_max         0.434
_refine_diff_density_min         -0.439
_refine_diff_density_rms         0.071

_shelxl_version_number 2012-9


_shelx_res_file
;
TITL 2012scas0005 in P-1
CELL  0.71073   9.3731  12.0192  13.0783  108.637   95.801   95.605
ZERR     2.00   0.0027   0.0035   0.0041    0.005    0.006    0.004
LATT   1
SFAC  C    H    N    O    P    S
UNIT  48 78 4 12 2 4
MERG   2
SHEL 7 0.8
OMIT -4 -2 12
FMAP   2
PLAN   25
ACTA
HTAB
TEMP -173
SIZE 0.10 0.03 0.01
L.S.   4
EQIV $1 -x, -y, -z+2
HTAB N1 O2_$1
EQIV $2 -x, -y+1, -z+2
HTAB N2 O5_$2
HTAB N2 O1
HTAB N2 S1
HTAB N2 O5

WGHT    0.035600    0.747700
FVAR       0.55733
MOLE    1
P1    5   -0.011917    0.244074    1.195214    11.00000    0.02077    0.01826 =
         0.01887    0.00770    0.00112    0.00590
O1    4   -0.204953    0.219361    0.811288    11.00000    0.02260    0.01617 =
         0.02407    0.00624   -0.00019    0.00654
O2    4   -0.001613    0.115734    1.139772    11.00000    0.02371    0.01581 =
         0.01999    0.00737    0.00304    0.00798
O3    4    0.122075    0.330577    1.239494    11.00000    0.02533    0.02518 =
         0.03238    0.01321   -0.00656   -0.00070
O4    4   -0.109693    0.256700    1.291687    11.00000    0.03607    0.02341 =
         0.02476    0.01064    0.01320    0.01026
N1    3   -0.148373    0.031846    0.777051    11.00000    0.01943    0.01668 =
         0.02066    0.00768   -0.00095    0.00569
H1A   2   -0.104411   -0.011762    0.800924    11.00000    0.02173
N2    3   -0.042687    0.305841    1.009184    11.00000    0.01727    0.01584 =
         0.01814    0.00710   -0.00045    0.00330
H1B   2    0.046556    0.358885    1.036013    11.00000    0.04857
H1C   2   -0.097735    0.339865    0.969536    11.00000    0.02058
C1    1   -0.215588    0.012184    0.584540    11.00000    0.02382    0.01806 =
         0.02159    0.00459    0.00374    0.00586
C2    1   -0.308510   -0.043246    0.486766    11.00000    0.03172    0.02404 =
         0.02346    0.00743    0.00235    0.00736
AFIX  43
H2    2   -0.292231   -0.022325    0.424318    11.00000   -1.20000
AFIX   0
C3    1   -0.423451   -0.127797    0.479314    11.00000    0.02839    0.02637 =
         0.02624   -0.00025   -0.00204    0.00819
AFIX  43
H3    2   -0.486109   -0.163820    0.412399    11.00000   -1.20000
AFIX   0
C4    1   -0.447469   -0.160140    0.569367    11.00000    0.01735    0.01874 =
         0.04010    0.00287   -0.00038    0.00319
AFIX  43
H4    2   -0.526016   -0.219291    0.563098    11.00000   -1.20000
AFIX   0
C5    1   -0.358094   -0.107269    0.669610    11.00000    0.01647    0.01825 =
         0.03129    0.00823    0.00468    0.00450
C6    1   -0.242808   -0.021231    0.675142    11.00000    0.01477    0.01325 =
         0.02108    0.00163   -0.00086    0.00560
C7    1   -0.090749    0.103517    0.590689    11.00000    0.03400    0.02335 =
         0.02313    0.00920    0.00653    0.00517
AFIX 137
H7A   2   -0.067881    0.094009    0.517142    11.00000   -1.50000
H7B   2   -0.006074    0.093184    0.635491    11.00000   -1.50000
H7C   2   -0.116809    0.182970    0.623448    11.00000   -1.50000
AFIX   0
C8    1   -0.383785   -0.144182    0.767283    11.00000    0.02149    0.02403 =
         0.03861    0.01103    0.00590    0.00160
AFIX 137
H8A   2   -0.397317   -0.074687    0.827925    11.00000   -1.50000
H8B   2   -0.300054   -0.178616    0.788885    11.00000   -1.50000
H8C   2   -0.470621   -0.203149    0.748291    11.00000   -1.50000
AFIX   0
C9    1   -0.133599    0.147660    0.834199    11.00000    0.01635    0.01991 =
         0.01968    0.00789    0.00568    0.00466
C10   1   -0.014157    0.187972    0.933738    11.00000    0.01809    0.01491 =
         0.01952    0.00508    0.00238    0.00481
AFIX  13
H10   2   -0.020747    0.128672    0.972630    11.00000   -1.20000
AFIX   0
C11   1    0.134520    0.195688    0.897949    11.00000    0.01549    0.01648 =
         0.01869   -0.00024    0.00119    0.00262
C12   1    0.171788    0.265582    0.835030    11.00000    0.02097    0.02326 =
         0.02250    0.00623   -0.00239    0.00121
AFIX  43
H12   2    0.104622    0.312705    0.816488    11.00000   -1.20000
AFIX   0
C13   1    0.306231    0.266756    0.799351    11.00000    0.02333    0.02893 =
         0.02287    0.00632   -0.00136   -0.00699
AFIX  43
H13   2    0.331562    0.315417    0.757463    11.00000   -1.20000
AFIX   0
C14   1    0.403595    0.196572    0.825082    11.00000    0.01978    0.03194 =
         0.02919   -0.00461    0.00585   -0.00318
AFIX  43
H14   2    0.495031    0.195894    0.799647    11.00000   -1.20000
AFIX   0
C15   1    0.366963    0.127325    0.888131    11.00000    0.01989    0.01846 =
         0.04253    0.00041   -0.00078    0.00679
AFIX  43
H15   2    0.434035    0.080043    0.906509    11.00000   -1.20000
AFIX   0
C16   1    0.232703    0.126915    0.924416    11.00000    0.01873    0.01521 =
         0.02893    0.00343    0.00167    0.00225
AFIX  43
H16   2    0.208212    0.079364    0.967466    11.00000   -1.20000
AFIX   0
C17   1   -0.127181    0.299761    1.103170    11.00000    0.01799    0.01923 =
         0.01848    0.00750    0.00521    0.00518
C18   1   -0.148844    0.427296    1.162463    11.00000    0.02875    0.02168 =
         0.02266    0.00847    0.00832    0.01136
AFIX 137
H18A  2   -0.204139    0.457699    1.111963    11.00000   -1.50000
H18B  2   -0.054320    0.476441    1.189772    11.00000   -1.50000
H18C  2   -0.201995    0.429714    1.223761    11.00000   -1.50000
AFIX   0
C19   1   -0.272003    0.221520    1.055702    11.00000    0.01804    0.02623 =
         0.02478    0.01024    0.00440    0.00566
AFIX 137
H19A  2   -0.330137    0.223895    1.114389    11.00000   -1.50000
H19B  2   -0.255374    0.139781    1.019672    11.00000   -1.50000
H19C  2   -0.323686    0.250539    1.002501    11.00000   -1.50000
AFIX   0
C20   1   -0.186017    0.154948    1.307577    11.00000    0.03542    0.03558 =
         0.03530    0.01363    0.01268    0.00338
AFIX 137
H20A  2   -0.272395    0.124154    1.252803    11.00000   -1.50000
H20B  2   -0.214950    0.177998    1.380605    11.00000   -1.50000
H20C  2   -0.122667    0.093420    1.300139    11.00000   -1.50000
AFIX   0
MOLE    2
S1    6   -0.323627    0.457675    0.872585    11.00000    0.01799    0.01869 =
         0.02375    0.00642   -0.00116    0.00143
O5    4   -0.170074    0.496754    0.933383    11.00000    0.01639    0.02084 =
         0.02482    0.00844   -0.00475   -0.00155
C21   1   -0.307784    0.419499    0.731911    11.00000    0.02801    0.02010 =
         0.02361    0.00532   -0.00002    0.00502
AFIX 137
H21A  2   -0.244724    0.482818    0.719912    11.00000   -1.50000
H21B  2   -0.403798    0.409284    0.690065    11.00000   -1.50000
H21C  2   -0.266077    0.345302    0.708036    11.00000   -1.50000
AFIX   0
C22   1   -0.402489    0.589920    0.885119    11.00000    0.02443    0.01918 =
         0.03622    0.00230   -0.00484    0.00944
AFIX 137
H22A  2   -0.414771    0.628530    0.961346    11.00000   -1.50000
H22B  2   -0.497068    0.569996    0.839418    11.00000   -1.50000
H22C  2   -0.338918    0.643828    0.861473    11.00000   -1.50000
AFIX   0
MOLE    3
S2    6   -0.694602    0.418915    0.525689    11.00000    0.03137    0.03153 =
         0.03528    0.00873    0.00359    0.00618
O6    4   -0.625679    0.463235    0.642902    11.00000    0.03326    0.05562 =
         0.03687    0.01179   -0.01332    0.00230
C23   1   -0.784310    0.533912    0.505210    11.00000    0.05467    0.03228 =
         0.03713    0.00958    0.01211    0.01114
AFIX 137
H23A  2   -0.841227    0.563714    0.564649    11.00000   -1.50000
H23B  2   -0.848830    0.503513    0.435629    11.00000   -1.50000
H23C  2   -0.712745    0.598442    0.503966    11.00000   -1.50000
AFIX   0
C24   1   -0.853146    0.321385    0.519986    11.00000    0.03443    0.03416 =
         0.04058    0.01333   -0.00456    0.00387
AFIX 137
H24A  2   -0.825341    0.250178    0.533304    11.00000   -1.50000
H24B  2   -0.910637    0.298859    0.447792    11.00000   -1.50000
H24C  2   -0.910733    0.361430    0.575721    11.00000   -1.50000
AFIX   0
HKLF    4

REM  2012scas0005 in P-1
REM R1 =  0.0691 for    4025 Fo > 4sig(Fo)  and  0.1056 for all    5617 data
REM    337 parameters refined using      0 restraints

END

WGHT      0.0288      1.0423

REM Instructions for potential hydrogen bonds
HTAB N1 O2_$1
HTAB N2 O5_$2
HTAB N2 O1
HTAB N2 O5
HTAB C10 O2
HTAB C18 O5
EQIV $3 -x-1, -y+1, -z+2
HTAB C18 O6_$3
HTAB C21 O3_$2
HTAB C21 O6
HTAB C21 O1
HTAB C22 O6
HTAB C22 O3_$2
HTAB C23 O4_$3
EQIV $4 x-1, y, z-1
HTAB C24 O4_$4

REM Highest difference peak  0.434,  deepest hole -0.439,  1-sigma level  0.071
Q1    1  -0.7116  0.5168  0.5581  11.00000  0.05    0.43
Q2    1  -0.0786  0.2679  1.1365  11.00000  0.05    0.40
Q3    1  -0.3838  0.5193  0.8793  11.00000  0.05    0.35
Q4    1   0.0138  0.3191  1.3012  11.00000  0.05    0.31
Q5    1  -0.0961  0.3040  1.0645  11.00000  0.05    0.31
Q6    1  -0.0013  0.2636  1.0583  11.00000  0.05    0.31
Q7    1  -0.4003 -0.0422  0.5022  11.00000  0.05    0.31
Q8    1  -0.5760  0.5061  0.9372  11.00000  0.05    0.29
Q9    1  -0.1154  0.4611  0.8906  11.00000  0.05    0.28
Q10   1  -0.7916  0.3710  0.5429  11.00000  0.05    0.27
Q11   1  -0.6747  0.4562  0.4535  11.00000  0.05    0.27
Q12   1   0.2631  0.3780  0.8800  11.00000  0.05    0.26
Q13   1  -0.0749  0.2403  1.2393  11.00000  0.05    0.25
Q14   1  -0.0174  0.1577  1.1125  11.00000  0.05    0.25
Q15   1   0.1747  0.1333  0.8861  11.00000  0.05    0.25
Q16   1  -0.5933  0.6202  0.7723  11.00000  0.05    0.25
Q17   1   0.0285  0.0483  1.1566  11.00000  0.05    0.25
Q18   1   0.1761  0.1246  0.7812  11.00000  0.05    0.24
Q19   1  -0.4705  0.1339  1.0881  11.00000  0.05    0.24
Q20   1  -0.3078  0.1756  0.7866  11.00000  0.05    0.24
Q21   1   0.3188  0.3193  0.8142  11.00000  0.05    0.24
Q22   1   0.0524  0.1785  0.9017  11.00000  0.05    0.24
Q23   1   0.1044  0.2366  1.2608  11.00000  0.05    0.24
Q24   1  -0.6581  0.5613  0.6393  11.00000  0.05    0.24
Q25   1  -0.8858  0.3579  0.6017  11.00000  0.05    0.24
;
_shelx_res_checksum   67514


_shelx_hkl_file
;
   0   0   2   31.65    8.59
   0   0  -2   20.76    5.40
   0   0   2   32.03    6.19
   0   0  -2   38.42    7.08
   0   0  -2   35.79    7.00
   0   0   2   33.50    6.76
   0   0  -2   31.86    6.50
   0   0   2   37.96    7.34
   0   0  -3 4678.34   67.04
   0   0  -3 4821.10   67.46
   0   0   3 4848.55   68.31
   0   0  -3 4714.74   65.53
   0   0   3 4862.70   67.41
   0   0  -4   10.50    4.71
   0   0   4   -2.72    2.46
   0   0  -4    0.75    1.93
   0   0  -4    5.68    3.47
   0   0   4    3.98    2.41
   0   0  -4    2.29    1.28
   0   0   4    5.74    2.27
   0   0  -5  169.28   26.12
   0   0   5  204.98   16.15
   0   0  -5  205.18   13.89
   0   0  -5  172.25   23.78
   0   0   5  213.89   25.51
   0   0  -5  190.35   16.05
   0   0   5  183.28   12.66
   0   0  -6  229.42   30.30
   0   0   6  231.65   10.09
   0   0  -6  256.52   13.40
   0   0  -6  217.89   15.46
   0   0   6  257.04   22.03
   0   0  -6  241.65   11.65
   0   0   6  246.75   10.41
   0   0  -7   84.50   12.58
   0   0   7   76.26   15.55
   0   0  -7   69.38   13.78
   0   0  -7   66.42   14.79
   0   0   7   57.43   11.92
   0   0  -7   67.47   17.13
   0   0   7   54.89   12.03
   0   0  -8    2.63    4.06
   0   0   8    5.41    4.06
   0   0  -8    2.72    2.18
   0   0  -8   -2.29    3.66
   0   0  -8   14.45    5.82
   0   0   8    6.38    4.59
   0   0   9    2.73    2.24
   0   0  -9    7.03    4.80
   0   0  -9   21.68    8.66
   0   0  10  129.37   26.46
   0   0 -10  139.81   28.85
   0   0 -10   88.28   22.02
   0   0  11   12.40    7.50
   0   0 -11   -2.16    7.76
   0   0 -11   14.18    8.95
   0   0  12   -2.05    3.87
   0   0 -12   -3.19    9.09
   0   0 -12    7.94    9.78
   0   0  13   26.85   12.17
   0   0 -13   17.65   12.70
   0   0 -13   34.17   13.12
   0   0  14    4.60    5.81
   0   0 -14   22.20   15.45
   0   0 -14    6.56    7.33
   0   0 -15   42.95   18.72
   0   0 -16   12.65   12.97
   0   0 -17   44.82   19.63
   0   0 -18   14.68   12.10
   0   0 -19    8.31    4.96
   0   1 -19    3.81    5.93
   0   1 -19   41.50   18.66
   0   1 -18   -3.48    7.82
   0   1 -18   31.63   16.63
   0   1 -17   24.11   16.19
   0   1 -16   -3.27    7.49
   0   1 -15   55.84   19.73
   0  -1  14    7.75    7.59
   0   1 -14   24.43   14.30
   0  -1  13   22.11    9.91
   0   1 -13   44.50   17.94
   0  -1  12  172.37   41.47
   0   1 -12  165.12   40.92
   0   1 -12  126.55   29.76
   0  -1  11   26.45   11.71
   0   1 -11   18.00    8.13
   0   1 -11   18.96    9.58
   0   1 -11   38.78   14.19
   0  -1  10  471.07   28.76
   0   1 -10  455.33   22.54
   0   1 -10  444.29   40.16
   0   1 -10  456.01   24.05
   0  -1   9   13.03    4.99
   0   1  -9    6.37    4.30
   0   1  -9   14.32    7.54
   0   1  -9   14.59    5.83
   0   1  -8  127.02   18.54
   0  -1   8  150.12   17.37
   0   1  -8  148.42   14.96
   0   1  -8  157.31   22.07
   0   1  -8  157.51   25.09
   0  -1   8  146.96   11.25
   0   1  -7   23.89   11.28
   0  -1   7   31.42   14.76
   0   1  -7   22.54    8.50
   0   1  -7   36.98    9.17
   0  -1   7   44.27    7.83
   0   1  -7   25.05    9.90
   0  -1   7   39.56    7.59
   0   1  -6   18.79    8.32
   0  -1   6   11.30    4.83
   0   1  -6   13.26    5.49
   0   1  -6    8.88    5.19
   0  -1   6   11.61    5.47
   0   1  -6   14.07    5.74
   0  -1   6   16.37    6.27
   0   1  -5  624.90   27.59
   0  -1   5  611.68   24.33
   0   1  -5  617.16   24.88
   0   1  -5  634.14   28.07
   0   1  -5  629.80   25.34
   0  -1   5  650.43   25.26
   0   1  -4  250.75   36.72
   0  -1   4  217.86   16.93
   0   1  -4  240.50   13.74
   0   1  -4  236.44   11.00
   0  -1   4  229.02   81.25
   0   1  -4  227.91   80.80
   0  -1   4  244.68    9.77
   0  -1   3  103.32    8.01
   0   1  -3   89.52   12.40
   0   1  -3  109.19   13.98
   0  -1   3   93.43    8.64
   0   1  -3   93.27    9.64
   0  -1   2  887.09   13.69
   0   1  -2  892.74   13.98
   0   1  -2  904.29   14.76
   0  -1   2  908.19   13.77
   0   1   2   22.47    6.23
   0  -1  -2   13.64    4.71
   0  -1  -2   14.58    3.69
   0   1   2   16.96    3.66
   0  -1  -2   15.61    4.58
   0   1   2   15.69    5.37
   0   1   3 1198.27   21.26
   0   1   3 1215.90   17.90
   0  -1  -3 1212.13   19.00
   0   1   3 1221.19   18.70
   0  -1  -3 1243.62   19.80
   0   1   3 1229.11   18.46
   0   1   4  349.95   17.87
   0  -1  -4  374.09   17.83
   0   1   4  360.57   14.58
   0  -1  -4  347.63   14.88
   0   1   4  364.53   15.76
   0  -1  -4  360.65   16.15
   0   1   4  361.96   18.74
   0   1   5  187.48   14.94
   0  -1  -5  211.84   31.32
   0   1   5  204.83   15.77
   0  -1  -5  192.85   31.36
   0   1   5  226.68   83.10
   0  -1  -5  208.10   20.26
   0   1   5  215.11   16.33
   0   1   6   86.81   17.09
   0  -1  -6   64.86   11.70
   0   1   6   59.27    9.62
   0   1   6   55.51   11.06
   0  -1  -6   66.81   12.73
   0   1   6   60.09   10.43
   0  -1  -7   14.42   10.14
   0   1   7    9.52    4.44
   0  -1  -7   -2.71    6.29
   0   1   7   12.70    7.43
   0  -1  -7    3.47    2.83
   0   1   7    7.67    4.00
   0  -1  -8  315.99   46.22
   0   1   8  424.18   18.69
   0  -1  -8  427.37   29.99
   0  -1  -8  429.40   20.26
   0   1   8  424.18   17.68
   0   1   9   58.18   13.42
   0  -1  -9   47.69   12.00
   0  -1  -9   35.12   12.41
   0   1  10   55.17   13.06
   0  -1 -10   51.40   14.74
   0  -1 -10   54.37   13.90
   0   1  11   37.28   15.96
   0  -1 -11   40.98   18.46
   0  -1 -11   33.08   14.45
   0   1  12   26.30   13.07
   0  -1 -12   27.27   15.37
   0  -1 -12    8.09    7.55
   0   1  13   46.86   18.47
   0  -1 -13   84.67   21.95
   0  -1 -13   48.26   17.99
   0   1  14   -0.57    3.19
   0  -1 -14  -16.50    9.47
   0  -1 -14    5.64    7.55
   0  -1 -15   14.50   12.28
   0  -1 -16   58.31   26.07
   0  -1 -17   17.63   13.16
   0  -1 -18   14.80    5.59
   0   2 -19   10.52   10.91
   0   2 -19   10.59   15.11
   0   2 -18   10.40   10.93
   0   2 -18  -10.70   10.84
   0   2 -17   20.45    8.95
   0   2 -17   34.14   18.34
   0   2 -16   14.56   11.58
   0   2 -16   -6.14    9.53
   0  -2  15    5.94    7.26
   0   2 -15   31.34   18.45
   0  -2  14    8.78    6.66
   0   2 -14   25.00   27.42
   0  -2  13   25.24   12.70
   0   2 -13   31.12   11.94
   0  -2  12   17.61    8.82
   0   2 -12   11.03    7.37
   0   2 -12   33.15   15.35
   0  -2  11  234.11   20.47
   0   2 -11  145.46   35.57
   0   2 -11  198.07   50.43
   0  -2  10   82.30   16.07
   0   2 -10   82.38   15.94
   0   2 -10   99.13   21.58
   0  -2   9  279.45   27.56
   0   2  -9  241.57   28.06
   0   2  -9  275.36   35.29
   0   2  -8  394.64   31.11
   0  -2   8  453.37   15.68
   0   2  -8  445.34   18.31
   0   2  -8  428.38   18.40
   0  -2   8  362.09   30.86
   0   2  -7   96.90   18.63
   0  -2   7  132.94   16.08
   0   2  -7  138.66   14.76
   0   2  -7  132.15   18.95
   0  -2   7  150.96   16.15
   0  -2   7  142.29    6.77
   0   2  -6  435.91   16.36
   0  -2   6  413.47   19.15
   0   2  -6  407.45   15.46
   0   2  -6  415.62   13.83
   0  -2   6  429.27   12.53
   0  -2   6  443.96   10.78
   0  -2   5 1193.46   20.25
   0   2  -5 1233.60   18.80
   0   2  -5 1243.75   20.33
   0  -2   5 1228.72   19.49
   0  -2   4  181.84   12.79
   0   2  -4  191.87   13.17
   0   2  -4  208.97   19.25
   0   2  -4  194.88   26.88
   0  -2   4  200.79   16.13
   0  -2   3  127.11   17.39
   0   2  -3  122.68   15.35
   0   2  -3  131.12    9.93
   0  -2   3  126.28   17.00
   0   2  -3  131.55   17.15
   0  -2   3  141.80   16.50
   0  -2   2   24.48    6.56
   0   2  -2   28.30    5.62
   0   2  -2   27.04    6.76
   0  -2   2   21.45    4.32
   0   2  -2   30.19    5.84
   0  -2   2   32.78    6.25
   0  -2   2   33.41    6.69
   0  -2   1 1419.13   21.09
   0   2  -1 1382.32   20.24
   0   2   0   69.80    9.13
   0  -2   0   72.02   10.91
   0   2   0   51.70   12.91
   0  -2   0   76.70    8.97
   0  -2   0   68.56    9.13
   0   2   0   69.31    8.50
   0   2   1 1427.97   23.80
   0  -2  -1 1398.67   21.61
   0   2   1 1401.96   25.65
   0  -2  -1 1387.37   21.51
   0  -2  -1 1407.92   20.31
   0  -2  -1 1446.21   22.22
   0   2   1 1444.68   21.44
   0   2   2 3413.15   60.84
   0  -2  -2 3416.05   50.74
   0   2   2 3357.71   48.44
   0  -2  -2 3466.51   49.78
   0  -2  -2 3476.84   49.14
   0   2   2 3401.74   48.07
   0  -2  -2 3470.24   49.28
   0   2   2 3519.29   49.90
   0   2   3  358.14   21.86
   0  -2  -3  371.83   19.71
   0  -2  -3  328.93   14.47
   0  -2  -3  337.52   14.34
   0   2   3  365.29   15.20
   0  -2  -3  370.65   16.40
   0   2   3  395.64   21.06
   0   2   4  274.97   15.02
   0  -2  -4  285.65   33.84
   0   2   4  272.60   11.84
   0  -2  -4  294.06   14.31
   0  -2  -4  259.21   27.10
   0   2   4  317.01   27.83
   0  -2  -4  283.39   14.49
   0   2   4  271.00   12.02
   0   2   5  439.61   18.31
   0  -2  -5  439.96   20.07
   0   2   5  468.77   16.28
   0  -2  -5  464.63   17.91
   0  -2  -5  467.26   16.52
   0   2   5  463.97   13.68
   0  -2  -5  450.25   20.33
   0   2   5  469.25   12.88
   0   2   6  145.01   26.50
   0  -2  -6  113.17   14.71
   0   2   6  118.02   10.25
   0  -2  -6  115.55   12.95
   0  -2  -6  102.64   14.32
   0   2   6  106.20   11.89
   0  -2  -6  117.21   17.66
   0   2   6  108.42   13.46
   0   2   7   27.68   16.50
   0  -2  -7   38.33    9.42
   0   2   7   45.96   10.09
   0  -2  -7   28.18   15.70
   0  -2  -7   22.79    9.27
   0   2   7   34.08    8.01
   0  -2  -7   41.96   12.92
   0   2   7   41.16    9.15
   0  -2  -8  475.40   50.77
   0   2   8  505.67   33.15
   0  -2  -8  501.85   34.37
   0  -2  -8  462.46   39.13
   0   2   8  522.54   34.74
   0   2   9   43.45   16.14
   0  -2  -9   35.66   13.52
   0  -2  -9   27.15   12.32
   0   2  10  243.69   13.74
   0  -2 -10  260.41   28.31
   0  -2 -10  253.01   27.65
   0   2  11  292.35   23.72
   0  -2 -11  267.38   41.31
   0  -2 -11  269.75   34.61
   0   2  12   25.91   11.52
   0  -2 -12   12.97   10.65
   0  -2 -12    9.68    9.27
   0   2  13   49.08   16.05
   0  -2 -13   67.24   20.92
   0  -2 -13   31.99   15.16
   0  -2 -14   45.99   19.21
   0  -2 -14   51.94   21.25
   0  -2 -15    8.21    8.23
   0  -2 -16   18.63   12.24
   0  -2 -17   -2.56    9.94
   0  -2 -18   40.73   19.23
   0   3 -19   29.21   16.57
   0   3 -19   -2.77   10.40
   0   3 -18    1.59    5.26
   0   3 -18   14.66   14.07
   0   3 -17   57.01   24.96
   0   3 -17   63.51   27.62
   0   3 -16   28.80   16.93
   0   3 -16   38.88   18.27
   0  -3  15   38.87   15.04
   0   3 -15   11.94   11.19
   0   3 -15   49.43   16.20
   0  -3  14   91.56   23.66
   0   3 -14   74.56   25.31
   0   3 -14   86.14   21.80
   0  -3  13   25.60   12.60
   0   3 -13   12.40    7.69
   0   3 -13   14.33    9.10
   0   3 -13   45.59   16.59
   0  -3  12   15.35    7.72
   0   3 -12   13.70    9.17
   0   3 -12   28.08   11.61
   0   3 -12   41.51   18.62
   0  -3  11  312.21   33.87
   0   3 -11  305.90   34.75
   0   3 -11  332.49   33.06
   0  -3  10  161.63   23.04
   0   3 -10  113.66   20.44
   0   3 -10  123.99   24.36
   0   3 -10  132.26   25.56
   0  -3   9   29.66    7.76
   0   3  -9   11.44    4.14
   0   3  -9   22.95    8.79
   0   3  -9   35.05    9.90
   0   3  -8  214.23   25.74
   0  -3   8  255.24   18.65
   0   3  -8  253.92   21.38
   0   3  -8  274.03   29.70
   0   3  -8  279.43   33.28
   0  -3   8  211.36   24.01
   0  -3   7   39.00    6.91
   0   3  -7   26.16    9.93
   0   3  -7   25.31   10.22
   0   3  -7   45.68    8.33
   0  -3   7   27.12   10.36
   0  -3   6   49.58    9.04
   0   3  -6   65.62   10.79
   0   3  -6   57.92   10.85
   0   3  -6   69.10   13.79
   0  -3   6   61.09   10.22
   0  -3   6   64.35    8.39
   0  -3   5  197.97   26.84
   0   3  -5  172.51   17.45
   0   3  -5  223.39   83.55
   0   3  -5  159.51   24.72
   0  -3   5  178.62   24.26
   0  -3   5  181.73   12.09
   0  -3   4  778.51   15.20
   0   3  -4  821.70   13.78
   0   3  -4  781.38   13.84
   0  -3   4  787.38   13.58
   0   3  -4  769.21  272.35
   0  -3   4  801.22   13.61
   0  -3   4  791.32   12.52
   0  -3   3   -1.42    5.90
   0   3  -3    8.97    3.94
   0  -3   3   12.38    5.23
   0  -3   3   11.15    2.46
   0  -3   3    6.54    2.17
   0  -3   2  135.26   19.09
   0   3  -2  133.88   14.93
   0   3  -2  137.54   20.63
   0  -3   2  136.77   17.33
   0   3  -2  123.78   10.89
   0  -3   2  129.22   13.40
   0  -3   2  123.53   18.43
   0   3  -1 1061.61   16.78
   0   3  -1 1071.46   17.44
   0   3  -1 1066.25   18.05
   0  -3   1 1091.19   18.00
   0  -3   1 1069.51   15.77
   0  -3   1 1044.55   16.64
   0   3  -1 1104.11   17.16
   0   3   0 2218.02   35.29
   0  -3   0 2241.44   32.49
   0   3   0 2224.87   33.32
   0  -3   0 2300.71   34.10
   0  -3   0 2216.22   32.89
   0   3   0 2247.82   33.36
   0   3   1   72.23   11.17
   0  -3  -1   79.71   11.40
   0   3   1  108.17   16.19
   0  -3  -1   68.74    9.10
   0  -3  -1   99.64   12.83
   0  -3  -1   81.33   11.71
   0   3   1   77.16   10.64
   0   3   2  307.97   15.92
   0  -3  -2  343.42   19.15
   0   3   2  296.26   15.12
   0  -3  -2  301.69   17.07
   0  -3  -2  294.73   12.45
   0  -3  -2  293.72   13.72
   0   3   2  307.29   13.58
   0   3   3  578.90   26.23
   0  -3  -3  623.71   27.00
   0   3   3  585.42   25.94
   0  -3  -3  618.38   25.28
   0  -3  -3  579.72   23.41
   0   3   3  583.42   23.48
   0  -3  -3  604.96   30.81
   0   3   3  629.55   25.36
   0   3   4  882.20   30.19
   0  -3  -4  835.49   36.70
   0  -3  -4  844.59   25.77
   0  -3  -4  848.09   21.78
   0   3   4  805.33   21.35
   0  -3  -4  888.41   24.50
   0   3   4  840.88   25.62
   0   3   5 1005.99   35.22
   0  -3  -5 1050.09   33.58
   0   3   5  990.08   29.01
   0  -3  -5 1050.71   31.43
   0  -3  -5 1027.97   30.16
   0   3   5 1008.76   29.80
   0  -3  -5 1044.37   31.76
   0   3   5 1025.89   29.98
   0   3   6   43.33   11.87
   0  -3  -6   74.39   17.33
   0   3   6   49.45   10.68
   0  -3  -6   25.15    7.98
   0  -3  -6   35.38    7.61
   0   3   6   45.64   10.11
   0  -3  -6   61.37   13.59
   0   3   6   31.28    7.44
   0   3   7   11.58    7.18
   0  -3  -7   -2.39    7.27
   0   3   7   -3.49    3.49
   0  -3  -7   12.26    5.98
   0   3   7    5.72    4.52
   0  -3  -7    5.38    5.30
   0   3   7    8.79    5.61
   0   3   8   25.75   10.81
   0  -3  -8   26.78   14.01
   0   3   8   -0.70    3.76
   0  -3  -8   18.08    6.59
   0  -3  -8   12.57    8.73
   0   3   8    8.64    5.40
   0   3   9   90.13   20.87
   0  -3  -9   84.96   19.59
   0  -3  -9  110.42   28.10
   0   3  10    0.14    3.04
   0  -3 -10   22.09   11.14
   0  -3 -10    7.56    6.66
   0   3  11  188.25   21.61
   0  -3 -11  160.17   26.76
   0  -3 -11  176.25   33.05
   0   3  12    7.75    7.56
   0  -3 -12   20.88   11.69
   0  -3 -12   12.77    9.53
   0   3  13   -1.55    2.42
   0  -3 -13   -5.10    8.91
   0  -3 -13   28.01   16.46
   0  -3 -14  127.40   35.32
   0  -3 -14  104.00   31.06
   0  -3 -15   17.19    8.61
   0  -3 -16   29.30   14.55
   0  -3 -17   16.68   12.73
   0   4 -20   17.96   11.55
   0   4 -19   -1.50    4.64
   0   4 -19    5.26    7.97
   0   4 -18   14.98   14.94
   0   4 -18   -5.75   11.58
   0   4 -17    0.44    6.80
   0   4 -17   13.64   11.07
   0   4 -16   69.24   27.50
   0   4 -16   98.92   20.75
   0  -4  15   -3.39    4.84
   0   4 -15   17.89   12.23
   0   4 -15   37.23   17.39
   0  -4  14   -0.72    5.88
   0   4 -14   11.98    9.28
   0   4 -14   21.41   12.19
   0  -4  13   87.48   19.30
   0   4 -13   90.85   20.62
   0   4 -13   89.98   21.71
   0  -4  12   14.91    7.29
   0   4 -12   13.49    8.96
   0   4 -12   12.63    9.34
   0   4 -12   33.93   14.32
   0   4 -11   71.42   16.87
   0   4 -11  111.54   26.33
   0   4 -11  109.50   22.89
   0  -4  10  100.57   19.34
   0   4 -10   85.82   15.24
   0   4 -10  104.33   20.12
   0   4 -10  100.22   18.18
   0  -4   9   94.79   18.52
   0   4  -9   63.42   13.83
   0   4  -9   88.49   17.10
   0   4  -9   81.21   16.16
   0  -4   8  637.50   20.18
   0   4  -8  594.95   21.26
   0   4  -8  612.16   20.09
   0   4  -8  603.73   20.60
   0  -4   8  624.69   19.22
   0  -4   7  266.17  162.20
   0   4  -7  202.93   25.89
   0   4  -7  228.25   18.08
   0   4  -7  245.44   30.56
   0  -4   7  223.05   26.60
   0  -4   7  223.14   15.53
   0  -4   6   47.40    8.73
   0   4  -6   44.88    7.41
   0   4  -6   55.04    9.91
   0   4  -6   52.98    8.53
   0  -4   6   41.74    7.12
   0  -4   6   72.35   11.23
   0  -4   5  100.39   14.78
   0   4  -5   69.81    9.88
   0   4  -5  125.50   17.43
   0  -4   5   84.26   10.47
   0   4  -5   75.86   12.54
   0  -4   5   96.59   11.03
   0  -4   5   92.62   11.26
   0  -4   4  229.63   84.96
   0   4  -4  232.93   23.58
   0   4  -4  215.73   28.21
   0  -4   4  222.70   80.99
   0   4  -4  228.14   81.02
   0  -4   4  240.06   16.81
   0  -4   4  209.18   14.18
   0  -4   3   14.93    4.63
   0   4  -3   18.73    4.43
   0   4  -3   14.78    4.23
   0  -4   3   13.69    4.74
   0   4  -3   25.70    6.02
   0  -4   3    9.26    2.33
   0   4  -2   -2.53    5.91
   0   4  -2   -0.75    6.37
   0  -4   2   -0.68    6.21
   0   4  -2    9.33    4.10
   0  -4   2    5.25    1.88
   0  -4   2    4.70    3.41
   0   4  -1 1081.59   18.19
   0   4  -1 1101.66   18.35
   0   4  -1 1074.70   18.35
   0  -4   1 1113.59   20.79
   0  -4   1 1069.96   16.12
   0  -4   1 1085.92   17.91
   0   4  -1 1109.48   18.03
   0   4   0  173.59   24.22
   0  -4   0  166.45   19.66
   0   4   0  121.84   13.21
   0   4   0  142.02   21.57
   0  -4   0  190.90   22.44
   0  -4   0  160.06   26.97
   0   4   0  157.11   18.35
   0   4   1   53.89   13.19
   0  -4  -1   45.99    8.71
   0   4   1   28.57    6.10
   0  -4  -1   33.80    6.51
   0  -4  -1   49.53    9.26
   0  -4  -1   37.03    8.48
   0   4   1   37.16    8.20
   0   4   2  796.63   17.41
   0  -4  -2  785.11   17.57
   0   4   2  820.99   18.37
   0  -4  -2  854.07   15.54
   0  -4  -2  843.95   14.46
   0  -4  -2  845.27   17.44
   0   4   2  823.75   14.69
   0   4   3  142.78   21.40
   0  -4  -3  137.31   19.57
   0   4   3  125.28   22.40
   0  -4  -3  135.70   14.07
   0  -4  -3  126.73   12.53
   0  -4  -3  132.70   17.24
   0   4   3  123.69   13.52
   0   4   4   95.34   14.49
   0  -4  -4  106.01   15.44
   0   4   4   97.79   15.53
   0  -4  -4   67.55   15.71
   0  -4  -4   90.00   10.03
   0   4   4   80.55   49.02
   0  -4  -4   89.95   13.42
   0   4   4   68.20   16.25
   0   4   5  425.91   18.53
   0  -4  -5  480.73   44.64
   0  -4  -5  397.08   13.71
   0  -4  -5  386.45   13.26
   0   4   5  371.37   27.22
   0  -4  -5  406.63   40.11
   0   4   5  356.30   31.17
   0   4   6  218.31   40.46
   0  -4  -6  214.44   29.63
   0   4   6  252.45   30.45
   0  -4  -6  232.51   30.14
   0   4   6  187.31   23.11
   0  -4  -6  221.77   32.57
   0   4   6  172.54   24.65
   0   4   7   56.85   16.72
   0  -4  -7   47.81   13.28
   0   4   7   48.54   12.55
   0  -4  -7   51.15   12.09
   0  -4  -7   40.67   10.78
   0   4   8   35.32   14.79
   0  -4  -8   49.98   18.74
   0  -4  -8   76.40   19.05
   0  -4  -8   67.37   17.50
   0   4   9  148.85   38.85
   0   4   9   90.17   24.80
   0  -4  -9  106.77   28.41
   0  -4  -9   83.00   24.66
   0   4  10   98.50   24.41
   0  -4 -10  137.34   30.86
   0  -4 -10   90.21   23.03
   0   4  11    8.14    5.96
   0  -4 -11   -0.35    6.82
   0  -4 -11    9.32    8.18
   0   4  12   40.14   15.07
   0  -4 -12   48.22   14.61
   0  -4 -12   15.71   11.49
   0  -4 -13   92.34   20.82
   0  -4 -13   72.47   31.52
   0  -4 -14   28.73   14.87
   0  -4 -14   25.30   27.53
   0  -4 -15   42.33   18.62
   0  -4 -16    4.78    7.25
   0  -4 -17   19.46   11.79
   0   5 -20    0.97    4.31
   0   5 -19   11.49   11.26
   0   5 -19   -4.16   12.39
   0   5 -18    1.51    7.08
   0   5 -17   19.71   10.65
   0   5 -17   -1.00   10.57
   0  -5  16    0.45    2.73
   0   5 -16    7.95    9.70
   0   5 -16   -5.04   10.37
   0  -5  15   15.11   10.13
   0   5 -15   18.48   13.19
   0   5 -15  -12.48    9.13
   0  -5  14   23.56   12.70
   0   5 -14   26.20   13.34
   0   5 -14   36.44   13.37
   0  -5  13   11.10    8.75
   0   5 -13   12.83    8.01
   0   5 -13   -4.87    9.32
   0  -5  12   37.06   15.21
   0   5 -12   12.31    8.03
   0   5 -12   27.90   11.86
   0   5 -12   18.22   10.76
   0  -5  11   17.40   12.27
   0   5 -11   30.03   13.15
   0   5 -11   32.98   11.68
   0   5 -11   40.47   15.20
   0  -5  10  163.32   29.89
   0   5 -10  121.93   26.44
   0   5 -10  184.46   33.22
   0   5 -10  160.73  120.39
   0  -5   9  648.63   45.23
   0   5  -9  646.04   42.36
   0   5  -9  615.23   55.76
   0   5  -9  607.58   46.93
   0  -5   8   52.12   12.20
   0   5  -8   51.18   12.18
   0   5  -8   63.00   14.49
   0   5  -8   65.13   14.35
   0  -5   8   33.01    7.99
   0  -5   8   47.70   10.77
   0  -5   8   52.23   10.85
   0  -5   7   53.32   11.80
   0   5  -7   58.43   13.00
   0   5  -7   92.06   15.35
   0   5  -7   82.84   10.95
   0  -5   7   75.94   16.13
   0  -5   7   84.66   11.08
   0  -5   6   33.05    6.73
   0   5  -6   42.89    8.70
   0   5  -6   40.76    8.14
   0  -5   6   54.02    9.67
   0   5  -6   36.80    8.20
   0  -5   6   37.51    6.62
   0  -5   6   47.82    7.90
   0  -5   5   33.70    8.09
   0   5  -5   18.93    8.37
   0   5  -5   37.91    8.49
   0   5  -5   31.04   14.59
   0  -5   5   32.26    5.47
   0  -5   5   28.05   10.41
   0  -5   4  271.33   35.48
   0   5  -4  224.77   23.80
   0   5  -4  181.25   28.76
   0  -5   4  216.06   21.43
   0   5  -4  224.89   25.35
   0  -5   4  230.98   19.71
   0  -5   4  221.28   11.37
   0  -5   3  180.42   20.64
   0   5  -3  110.98   13.00
   0   5  -3  130.51   22.30
   0  -5   3  113.01   15.78
   0   5  -3  143.37   21.18
   0  -5   3  146.39   16.99
   0  -5   3  144.55   17.20
   0   5  -2   -0.09    5.86
   0   5  -2   13.86    6.22
   0   5  -2   25.77   11.37
   0  -5   2    8.78    4.39
   0  -5   2    3.05    1.04
   0  -5   2    5.04    3.48
   0   5  -1  543.85   29.91
   0   5  -1  556.49   23.30
   0   5  -1  530.76   22.65
   0  -5   1  571.60   23.53
   0  -5   1  571.93   23.12
   0  -5   1  509.45   21.93
   0   5  -1  554.10   23.20
   0  -5   0   11.88    4.84
   0   5   0   -2.40    6.58
   0   5   0    5.85    4.76
   0  -5   0    6.40    3.71
   0  -5   0   12.26    3.62
   0   5   0    9.54    4.89
   0   5   1   -0.85    6.52
   0  -5  -1   -0.20    2.60
   0   5   1    5.31    3.81
   0  -5  -1    9.25    5.49
   0  -5  -1   -2.20    3.02
   0  -5  -1    3.90    4.43
   0   5   1   -2.88    6.39
   0   5   2  102.37   16.25
   0  -5  -2  112.26   17.64
   0   5   2   98.31   18.61
   0  -5  -2  107.01   18.13
   0  -5  -2  121.42   55.70
   0  -5  -2   81.14   14.50
   0   5   2  104.71   15.67
   0   5   3   83.86   13.35
   0  -5  -3   84.07   13.60
   0   5   3   71.05   18.07
   0  -5  -3   67.86   14.44
   0  -5  -3   72.58   15.01
   0  -5  -3   76.74   17.41
   0   5   3   54.07   11.42
   0   5   4    8.82    7.35
   0  -5  -4    7.37    4.12
   0   5   4   25.30    8.88
   0  -5  -4   16.31    8.04
   0  -5  -4   16.28    8.36
   0  -5  -4   -0.12    7.52
   0   5   4    5.93    3.91
   0   5   5    8.10    6.51
   0  -5  -5   12.76    5.50
   0   5   5   23.12    9.27
   0  -5  -5   24.81   10.17
   0  -5  -5   22.17    9.18
   0   5   6   65.21   18.11
   0  -5  -6   46.66   11.67
   0  -5  -6   52.27   12.90
   0  -5  -6   27.99   11.21
   0   5   7  160.79  119.36
   0  -5  -7  137.91   30.57
   0   5   7  143.32   29.05
   0  -5  -7  146.44   29.49
   0  -5  -7  147.51   30.68
   0   5   8  116.59   30.57
   0   5   8  116.74   29.97
   0  -5  -8  111.52   28.99
   0  -5  -8  109.93   27.98
   0   5   9  169.21   23.14
   0   5   9   99.34   22.55
   0  -5  -9  123.22   29.07
   0  -5  -9   97.54   24.92
   0   5  10   78.69   20.37
   0  -5 -10   72.35   28.93
   0  -5 -10   60.07   24.31
   0   5  11   16.90   11.54
   0  -5 -11   12.34   10.48
   0  -5 -11   29.16   14.16
   0   5  12   21.80   11.53
   0  -5 -12   17.10   10.03
   0  -5 -12   18.56   11.49
   0  -5 -13   17.80   12.12
   0  -5 -13   41.26   20.97
   0  -5 -14   44.11   18.84
   0  -5 -14   10.64    9.96
   0  -5 -15   15.96   13.88
   0  -5 -16   -0.94    8.29
   0   6 -20   -0.84    7.13
   0   6 -19   12.59    5.41
   0   6 -19   17.19   13.51
   0   6 -18   29.14   28.61
   0   6 -18   72.36   27.21
   0   6 -17   24.57   15.51
   0   6 -17    5.04    8.56
   0  -6  16   31.12   14.03
   0   6 -16   17.50   13.55
   0   6 -16   43.64   18.13
   0  -6  15  156.84   25.99
   0   6 -15  135.72   24.84
   0   6 -15  145.12   29.25
   0  -6  14   33.11   14.90
   0   6 -14   34.08   15.48
   0   6 -14   13.40    9.72
   0  -6  13    0.79    4.85
   0   6 -13   -8.14    8.88
   0   6 -13   -2.62    9.29
   0  -6  12  121.70   28.05
   0   6 -12  129.16   33.75
   0   6 -12  102.30   28.74
   0  -6  11   73.61   18.11
   0   6 -11   72.63   16.92
   0   6 -11   97.51   22.12
   0  -6  10   66.68   16.99
   0   6 -10   59.02   13.96
   0   6 -10   93.84   23.19
   0   6 -10   82.34   20.41
   0  -6   9  220.06   34.55
   0   6  -9  147.22   20.66
   0   6  -9  225.16   32.57
   0   6  -9  165.27   25.72
   0  -6   9  139.00   46.66
   0  -6   9  180.63   19.69
   0  -6   8   30.65    7.61
   0   6  -8   12.40    5.54
   0   6  -8   10.46    7.14
   0   6  -8   38.20    9.15
   0  -6   8   13.36    5.06
   0  -6   8   24.78    8.93
   0  -6   7   35.44    8.81
   0   6  -7   14.61    5.81
   0   6  -7   12.29    6.53
   0   6  -7   25.82    9.55
   0  -6   7   19.42    7.00
   0  -6   7   34.63    7.94
   0  -6   6  540.33   18.49
   0   6  -6  524.06   25.93
   0   6  -6  561.70   20.41
   0  -6   6  567.07   18.45
   0   6  -6  562.95   39.52
   0  -6   6  564.84   27.43
   0  -6   6  581.06   17.32
   0  -6   5   48.91   12.29
   0   6  -5   34.01    6.43
   0   6  -5   29.77   11.73
   0  -6   5   48.09    9.41
   0   6  -5   56.55    9.14
   0  -6   5   58.37    9.08
   0  -6   5   54.86   10.27
   0  -6   4   15.98    6.70
   0   6  -4   26.43   10.54
   0   6  -4   20.02    8.61
   0  -6   4   17.11    6.45
   0  -6   4   27.16   10.56
   0   6  -3 1155.74   29.65
   0   6  -3 1239.19   31.87
   0   6  -3 1182.91   30.56
   0  -6   3 1218.49   31.37
   0  -6   3 1216.35   29.23
   0  -6   3 1168.50   31.42
   0   6  -2  113.39   20.13
   0   6  -2   99.09   16.88
   0   6  -2  113.27   22.19
   0  -6   2  114.60   17.83
   0  -6   2  119.34   16.21
   0  -6   2  134.74   13.80
   0   6  -1    7.97    4.12
   0   6  -1   15.08    7.92
   0   6  -1   16.55    7.91
   0  -6   1   -7.24    5.59
   0  -6   1   -0.82    2.84
   0  -6   1   -6.14    7.06
   0   6   0   49.12    9.93
   0  -6   0   54.12    9.87
   0   6   0   55.85   11.05
   0   6   0   60.28   10.56
   0  -6   0   62.09    9.48
   0  -6   0   66.93   10.80
   0  -6   0   51.15   10.57
   0   6   0   41.27    7.35
   0   6   1   13.47    6.68
   0  -6  -1   16.35    7.79
   0   6   1   28.55    6.20
   0   6   1   33.53    8.44
   0  -6  -1   22.73    5.47
   0  -6  -1   22.85    5.01
   0  -6  -1   27.33    7.34
   0   6   1   14.53    8.83
   0   6   2   53.73   12.24
   0  -6  -2   37.50    8.19
   0   6   2   32.69    8.24
   0  -6  -2   23.20    5.20
   0  -6  -2   45.96   10.29
   0  -6  -2   30.90    8.20
   0   6   2   33.49    7.95
   0   6   3   42.74   10.63
   0  -6  -3   32.41    8.54
   0   6   3   31.13    8.40
   0  -6  -3   20.96    7.74
   0  -6  -3   26.99    9.65
   0  -6  -3   24.65   10.67
   0   6   4   66.72   18.00
   0  -6  -4   42.80    9.90
   0   6   4   45.72   11.24
   0  -6  -4   29.32    7.98
   0  -6  -4   36.56   10.82
   0   6   5   15.97    8.49
   0  -6  -5   13.50    4.93
   0   6   5   20.06    7.93
   0  -6  -5   21.60    7.39
   0  -6  -5   29.29   11.42
   0   6   6   86.57   22.68
   0  -6  -6   70.97   16.85
   0  -6  -6   59.91   13.74
   0  -6  -6   89.14   23.94
   0   6   7   11.32    7.39
   0  -6  -7    7.94    6.80
   0   6   7   17.43   10.85
   0  -6  -7   29.58   14.30
   0  -6  -7   -4.44    8.85
   0   6   8  -14.02    8.79
   0   6   8    6.87    6.53
   0  -6  -8    7.56    6.78
   0  -6  -8   -2.14    9.51
   0   6   9    9.42    7.38
   0   6   9    4.90    4.39
   0  -6  -9   10.16   10.65
   0  -6  -9   16.37   10.76
   0   6  10   41.45   16.51
   0   6  10   20.27   10.93
   0  -6 -10   19.31   12.23
   0  -6 -10   58.82   21.28
   0   6  11   23.30   13.47
   0  -6 -11   44.57   17.82
   0  -6 -11   51.73   23.56
   0  -6 -12   76.18   29.85
   0  -6 -12   22.96   17.88
   0  -6 -13   47.09   20.46
   0  -6 -13   43.26   18.76
   0  -6 -14   64.46   22.56
   0  -6 -14   41.89   20.61
   0  -6 -15    7.10    8.10
   0  -6 -16   -0.15    7.34
   0   7 -20   15.75    9.13
   0   7 -19   12.85    3.31
   0   7 -19   32.16   17.77
   0   7 -18   19.59   12.32
   0   7 -18    8.57    8.56
   0   7 -17    5.22    7.02
   0   7 -17   18.42    9.34
   0  -7  16   59.04   23.20
   0   7 -16   58.28   22.76
   0   7 -16   59.53   22.53
   0  -7  15   14.67   10.19
   0   7 -15   52.10   23.46
   0   7 -15   17.66   11.05
   0  -7  14   54.00   59.27
   0   7 -14   72.69   24.95
   0   7 -14   62.73   21.60
   0  -7  13  309.33   42.67
   0   7 -13  347.79   31.77
   0   7 -13  309.33   37.41
   0  -7  12   11.48    8.63
   0   7 -12   10.29    8.60
   0   7 -12    4.40    5.71
   0  -7  11   88.37   20.76
   0   7 -11   63.65   52.70
   0   7 -11   71.92   19.14
   0  -7  10   15.01    8.71
   0   7 -10   24.01    9.62
   0   7 -10   14.97    9.12
   0  -7  10    2.97    1.50
   0  -7  10    3.32    1.77
   0  -7   9   61.50   16.10
   0   7  -9   48.88   17.90
   0   7  -9   35.85   13.61
   0  -7   9   40.43   14.74
   0  -7   8  186.27   30.83
   0   7  -8  143.31   22.08
   0   7  -8  143.13   24.34
   0  -7   8  120.04   20.71
   0  -7   8  130.44   25.22
   0  -7   7  258.40   39.36
   0   7  -7  184.27   26.74
   0   7  -7  233.44   30.05
   0  -7   7  192.73   22.82
   0  -7   7  200.07   23.77
   0  -7   6   74.42   13.97
   0   7  -6   60.43   16.35
   0   7  -6   78.12   18.69
   0   7  -6  108.66   20.89
   0  -7   6   98.31   16.54
   0  -7   6   95.09   16.61
   0   7  -5   23.07    6.44
   0   7  -5   23.39    6.83
   0  -7   5   15.74    8.08
   0   7  -5   17.99    8.86
   0  -7   5   32.10    6.75
   0  -7   5   17.76    8.82
   0   7  -4    2.31    3.99
   0   7  -4    3.14    3.15
   0   7  -4    4.04    5.46
   0  -7   4  -10.32    4.97
   0   7  -4    7.44    4.10
   0  -7   4    1.76    0.99
   0  -7   4   -6.59    4.92
   0   7  -3  176.77   23.61
   0   7  -3  134.85   20.77
   0   7  -3  197.58   23.94
   0  -7   3  152.30   20.62
   0  -7   3  175.77   12.83
   0  -7   3  178.76   24.93
   0   7  -2  285.55   28.35
   0   7  -2  185.09   27.22
   0   7  -2  235.46   19.76
   0  -7   2  205.50   23.50
   0  -7   2  231.45   16.25
   0  -7   2  253.54   30.28
   0   7  -1  793.04   24.90
   0   7  -1  788.43   24.81
   0   7  -1  794.83   28.15
   0  -7   1  772.06   27.65
   0  -7   1  796.08   24.35
   0  -7   1  778.76   25.84
   0   7   0  505.77   22.69
   0  -7   0  540.91   17.21
   0   7   0  507.28   17.85
   0   7   0  507.96   18.35
   0  -7   0  529.17   17.32
   0  -7   0  536.98   15.87
   0  -7   0  539.60   19.38
   0   7   1   59.93   15.51
   0  -7  -1   56.53   13.13
   0   7   1   43.87   10.09
   0   7   1   63.73   15.88
   0  -7  -1   71.09   15.01
   0  -7  -1   40.72   10.35
   0   7   2  372.78   44.30
   0  -7  -2  305.92   26.83
   0   7   2  222.38   36.02
   0   7   2  335.22   49.05
   0  -7  -2  333.29   28.88
   0  -7  -2  312.96   39.10
   0   7   3   40.84   11.57
   0  -7  -3   21.16   10.22
   0   7   3   38.97   10.66
   0  -7  -3   30.24    9.85
   0  -7  -3   22.15    9.80
   0   7   4   28.13   12.48
   0  -7  -4    9.69    5.90
   0   7   4   -2.38    8.71
   0  -7  -4    0.58    2.33
   0  -7  -4   26.79   10.79
   0   7   5  408.62   58.07
   0  -7  -5  345.76   18.46
   0   7   5  414.94   29.76
   0  -7  -5  337.52   34.78
   0  -7  -5  374.49   43.11
   0   7   6   47.56   19.93
   0  -7  -6   11.64    7.31
   0  -7  -6   17.94    7.98
   0  -7  -6   -5.10    9.04
   0   7   7   79.98   29.73
   0  -7  -7   55.62   20.98
   0  -7  -7   65.60   25.41
   0   7   8   33.02   16.01
   0   7   8   29.29   13.29
   0  -7  -8   36.43   13.61
   0  -7  -8   52.43   20.34
   0   7   9   22.46   14.45
   0   7   9   11.71    8.97
   0  -7  -9    7.25    7.17
   0  -7  -9   -9.79   10.10
   0  -7 -10   14.43   10.28
   0  -7 -10   20.28   12.09
   0   7  11   -0.21    3.86
   0  -7 -11    1.54    5.80
   0  -7 -11   11.39    9.98
   0  -7 -12    7.80    8.64
   0  -7 -12   -4.41   11.60
   0  -7 -13    2.97    5.15
   0  -7 -13   34.75   16.11
   0  -7 -14   35.72   16.16
   0  -7 -14   48.92   28.73
   0  -7 -15   -8.18    6.63
   0   8 -19   14.71   12.38
   0   8 -19   14.70   12.03
   0   8 -18   -7.85    8.84
   0   8 -18   -7.99   10.52
   0   8 -17  -11.16    9.40
   0   8 -17   29.99   17.22
   0  -8  16    8.54    9.71
   0   8 -16   -6.42    9.69
   0   8 -16   12.09   13.69
   0  -8  15   -8.51    6.56
   0   8 -15    9.94   11.03
   0   8 -15  -12.82   10.14
   0  -8  14   11.53    9.74
   0   8 -14   17.27   12.31
   0   8 -14    6.10    8.63
   0  -8  13   39.33   14.16
   0   8 -13   40.80   14.88
   0   8 -13   43.06   16.31
   0  -8  12   29.70   11.44
   0   8 -12   29.80   13.53
   0   8 -12   27.97   14.82
   0  -8  11   -8.33    8.01
   0   8 -11   10.82    9.31
   0   8 -11    8.49    6.53
   0  -8  10  286.85   48.47
   0   8 -10  304.00   31.04
   0   8 -10  264.94   26.95
   0  -8  10  265.24   11.76
   0  -8   9  107.22   25.29
   0   8  -9  111.77   24.82
   0   8  -9  102.85   21.64
   0  -8   9   96.90   20.15
   0  -8   8  267.87   54.70
   0   8  -8  204.22   44.43
   0   8  -8  233.55   46.05
   0  -8   8  182.98   31.43
   0  -8   8  212.25   38.06
   0  -8   7  169.97   27.49
   0   8  -7  135.08   27.18
   0   8  -7  147.10   21.18
   0  -8   7  143.10   18.23
   0  -8   7  181.76   25.81
   0   8  -6   29.79   11.32
   0   8  -6   44.98   12.09
   0  -8   6   52.74   11.92
   0  -8   6   46.25   11.76
   0   8  -5   21.72    8.06
   0   8  -5   36.80    8.96
   0   8  -5   40.70    9.21
   0  -8   5   29.20    6.69
   0  -8   5   29.32    7.27
   0   8  -4   18.25    6.95
   0   8  -4   35.28    9.08
   0  -8   4   22.65    8.18
   0  -8   4   13.24    6.19
   0   8  -3  139.76   25.14
   0   8  -3  164.13   29.60
   0  -8   3  159.05   15.96
   0  -8   3  180.62   22.71
   0   8  -2  120.25   22.23
   0   8  -2   98.78   19.50
   0  -8   2  107.26   16.95
   0  -8   2  111.41   22.83
   0   8  -1   47.98   11.47
   0   8  -1   53.40   12.84
   0  -8   1   36.48    8.19
   0  -8   1   35.26    8.48
   0   8   0   37.49   10.04
   0   8   0   23.64    9.15
   0  -8   0   16.04    5.86
   0  -8   0   24.28    8.75
   0  -8   0   32.78    8.53
   0   8   1   -0.34    7.95
   0  -8  -1   -3.17    3.67
   0   8   1    3.88    4.18
   0  -8  -1    3.82    2.80
   0  -8  -1    1.69    5.14
   0   8   2  194.95   32.04
   0  -8  -2  137.78   25.28
   0   8   2  178.78   26.88
   0  -8  -2  206.73   26.95
   0  -8  -2  175.83   27.76
   0   8   3   40.33   15.91
   0  -8  -3   31.15   11.87
   0   8   3   39.79   15.28
   0  -8  -3   42.84   16.47
   0  -8  -3   58.30   16.30
   0   8   4   95.73   23.74
   0  -8  -4   51.04   18.87
   0   8   4  103.21   25.07
   0  -8  -4   81.46   18.87
   0  -8  -4   88.10   21.79
   0   8   5  318.89   49.30
   0  -8  -5  168.39   45.71
   0   8   5  303.56   45.56
   0  -8  -5  317.43   36.82
   0  -8  -5  268.84   34.34
   0   8   6   24.99   14.24
   0  -8  -6   14.35    8.73
   0  -8  -6   19.00    7.69
   0   8   7   36.91   22.50
   0  -8  -7   29.30   13.91
   0  -8  -7    7.93    6.62
   0   8   8  219.18   28.95
   0   8   8  158.97   23.24
   0  -8  -8  168.89   30.13
   0  -8  -8  170.60   29.39
   0   8   9   17.67   10.29
   0   8   9    4.15    5.16
   0  -8  -9   12.01    7.88
   0  -8  -9   35.41   19.13
   0   8  10    4.75    8.24
   0   8  10   12.13    9.15
   0  -8 -10   17.91   11.69
   0  -8 -10   19.16   14.79
   0   8  11    4.32    4.80
   0  -8 -11    9.85    8.46
   0  -8 -11   22.29   15.28
   0  -8 -12   28.29   16.93
   0  -8 -12   20.29   13.73
   0  -8 -13    7.82    8.39
   0  -8 -13   -3.83    9.97
   0  -8 -14   16.03   11.20
   0   9 -19   33.22   18.81
   0   9 -19   46.05   41.42
   0   9 -18   20.01   17.66
   0   9 -18    8.05   10.06
   0   9 -17   20.09   14.53
   0   9 -17   58.00   26.46
   0   9 -16   33.02   17.41
   0   9 -16   20.96   18.89
   0   9 -15   45.70   21.16
   0   9 -15   25.90   21.47
   0  -9  14   70.55   19.24
   0   9 -14   55.39   17.29
   0   9 -14   74.43   20.36
   0  -9  13   20.29   12.43
   0   9 -13   22.68   12.60
   0   9 -13   11.53    9.65
   0  -9  12   27.17   12.50
   0   9 -12   18.26   11.70
   0   9 -12   -2.44    8.43
   0  -9  11   -4.95    9.72
   0   9 -11   -4.22    9.20
   0   9 -11   25.55   13.84
   0  -9  11    7.05    5.00
   0  -9  10  172.67   42.93
   0   9 -10  179.44   47.81
   0   9 -10  164.43   41.11
   0  -9  10  114.46   33.17
   0   9  -9   11.35    8.89
   0   9  -9   28.63   12.48
   0  -9   9   12.39    7.33
   0   9  -8   17.63   15.24
   0   9  -8   16.52   10.38
   0  -9   8    7.58    3.98
   0  -9   8   16.55    9.27
   0   9  -7  218.73   42.73
   0   9  -7  312.02   36.17
   0  -9   7  250.55   38.52
   0  -9   7  267.08   42.70
   0   9  -6   29.35   11.56
   0   9  -6   31.04   13.95
   0   9  -6   21.03    8.38
   0  -9   6   38.86   14.01
   0  -9   6   42.62   16.13
   0   9  -5  157.51   29.86
   0   9  -5  130.09   26.47
   0  -9   5  147.01   18.39
   0  -9   5  157.51   21.01
   0   9  -4   88.89   17.56
   0   9  -4   77.12   26.99
   0  -9   4  105.01   16.85
   0  -9   4   82.21   15.95
   0   9  -3  436.05   44.09
   0   9  -3  427.26   29.94
   0  -9   3  425.41   28.04
   0  -9   3  399.38   49.42
   0   9  -2  141.52   26.62
   0   9  -2  144.78   22.84
   0  -9   2  154.56   17.28
   0  -9   2  174.20   24.95
   0   9  -1   30.10   11.41
   0   9  -1   28.22   10.22
   0  -9   1   32.29   10.44
   0  -9   1   38.79    9.52
   0  -9   1   41.61   12.27
   0   9   0  302.36  224.92
   0   9   0  329.36   45.64
   0  -9   0  277.10   41.47
   0  -9   0  312.76   15.41
   0  -9   0  272.49   51.82
   0   9   1    6.72    5.66
   0  -9  -1   -0.40    3.13
   0   9   1   -6.68    8.46
   0  -9  -1    4.57    2.26
   0  -9  -1   11.57    9.42
   0   9   2   18.40   13.45
   0  -9  -2   27.27   13.19
   0   9   2   28.12   15.01
   0  -9  -2   30.98   25.67
   0  -9  -2   49.93   18.70
   0   9   3    1.71    7.00
   0  -9  -3    9.74    9.15
   0   9   3    6.35   11.57
   0  -9  -3    9.34    7.72
   0  -9  -3   27.77   14.28
   0   9   4   14.00    9.99
   0  -9  -4    1.84    2.76
   0   9   4   14.99    9.73
   0  -9  -4    6.33    5.51
   0  -9  -4   21.87   13.61
   0   9   5   34.71   17.96
   0   9   5   87.57   24.12
   0  -9  -5   55.96   20.02
   0  -9  -5   45.99   19.59
   0   9   6    9.42    9.13
   0   9   6   14.34   11.37
   0  -9  -6    8.89    6.91
   0  -9  -6   19.96   18.11
   0   9   7   54.92   18.53
   0  -9  -7   50.24   15.21
   0  -9  -7   91.24   24.15
   0   9   8   40.57   17.55
   0   9   8   23.52   13.23
   0  -9  -8   35.90   18.58
   0  -9  -8   32.95   18.09
   0   9   9   50.84   22.83
   0   9   9   18.05   11.73
   0  -9  -9   42.71   18.06
   0  -9  -9   40.43   17.61
   0   9  10   20.32   12.28
   0  -9 -10   51.41   21.90
   0  -9 -10   51.68   26.36
   0  -9 -11   11.98   10.93
   0  -9 -11   -0.38   13.28
   0  -9 -12    6.92    7.25
   0  -9 -12  -10.73   11.30
   0  -9 -13   17.41   12.33
   0  10 -19   22.76   12.06
   0  10 -19   21.34   12.89
   0  10 -18    6.10   11.04
   0  10 -17   -2.32    9.10
   0  10 -17   -3.36    9.72
   0  10 -16    2.60    6.40
   0  10 -16   -6.91    9.39
   0  10 -15   -0.01    8.05
   0  10 -15   26.59   18.27
   0  10 -14    1.76    7.84
   0  10 -14    6.37   10.37
   0  10 -13   14.40   11.31
   0  10 -13   21.21   15.67
   0  10 -12  119.99   31.86
   0  10 -12  125.68   32.17
   0 -10  12   31.08   15.21
   0  10 -11   74.66   18.84
   0  10 -11   53.31   23.37
   0 -10  11   23.98   10.98
   0  10 -10   46.39   17.40
   0  10 -10   40.14   15.01
   0 -10  10   50.46   20.23
   0  10  -9  -11.23    8.75
   0  10  -9   31.99   14.85
   0 -10   9    9.19    7.07
   0  10  -8   27.27   12.24
   0  10  -8   15.13   10.66
   0  10  -8   33.74   11.95
   0 -10   8   24.28   10.63
   0 -10   8   20.21    9.04
   0  10  -7   17.16   10.46
   0  10  -7   28.43   13.05
   0  10  -7    5.07    5.16
   0 -10   7   15.84    8.92
   0 -10   7   15.69   10.73
   0  10  -6    8.98    7.60
   0  10  -6   -7.64    9.00
   0 -10   6   -2.87    2.99
   0 -10   6    5.44    5.63
   0  10  -5  351.61   31.64
   0  10  -5  303.93   42.77
   0 -10   5  326.40   16.34
   0 -10   5  326.21   30.44
   0  10  -4    9.34    6.19
   0  10  -4   23.84    9.64
   0 -10   4    6.53    2.44
   0 -10   4   21.37    8.74
   0  10  -3  104.31   22.55
   0  10  -3  103.33   21.74
   0 -10   3  108.00   21.91
   0 -10   3  103.37   24.16
   0  10  -2  645.54   46.85
   0  10  -2  654.53   36.71
   0 -10   2  696.37   33.43
   0 -10   2  678.05   32.69
   0 -10   2  620.15   61.25
   0  10  -1   45.40   17.29
   0  10  -1   56.99   20.31
   0 -10   1   44.97   15.13
   0 -10   1   39.44   13.83
   0 -10   1   21.77   12.57
   0  10   0   14.58   10.72
   0  10   0   19.16   11.40
   0 -10   0   20.88    9.30
   0 -10   0   26.18   11.11
   0 -10   0   -5.44    9.65
   0  10   1   30.60   13.01
   0  10   1   20.63   12.01
   0 -10  -1   21.23   10.33
   0 -10  -1   24.22   11.87
   0 -10  -1   30.40   15.31
   0  10   2   25.01   14.46
   0 -10  -2    6.96    4.99
   0  10   2   -3.15    9.91
   0 -10  -2   10.48    6.75
   0 -10  -2   -0.99    9.31
   0  10   3  120.10   29.09
   0  10   3  113.59   27.00
   0 -10  -3   94.78   23.98
   0 -10  -3  117.86   27.84
   0  10   4   42.81   18.65
   0  10   4   33.74   13.94
   0 -10  -4   34.12   12.42
   0 -10  -4    9.96    9.37
   0  10   5   61.30   22.36
   0  10   5   53.64   58.77
   0 -10  -5   39.68   15.30
   0 -10  -5   88.10   26.71
   0  10   6   89.38   23.32
   0  10   6   89.87   25.12
   0 -10  -6   68.78   17.68
   0 -10  -6   84.98   21.92
   0  10   7   13.01    9.29
   0 -10  -7    3.76    4.79
   0 -10  -7   -1.83   11.43
   0  10   8   18.60   14.50
   0  10   8   15.40   11.36
   0 -10  -8   18.38   12.85
   0 -10  -8   13.89   12.04
   0  10   9    7.16    7.63
   0 -10  -9   10.63    8.87
   0 -10  -9   29.24   16.97
   0 -10 -10   23.45   18.31
   0 -10 -11   16.50   13.83
   0 -10 -13   47.19   21.22
   0  11 -19    5.50    7.08
   0  11 -19    9.18   10.14
   0  11 -18   25.39   16.10
   0  11 -18   10.74   10.41
   0  11 -17   20.28   13.21
   0  11 -17   30.45   14.87
   0  11 -16   16.24   11.25
   0  11 -16   -4.50   10.01
   0  11 -15   13.99   11.60
   0  11 -15   25.30   26.06
   0  11 -14   26.66   18.75
   0  11 -14   33.16   16.78
   0  11 -13   -1.33    9.63
   0  11 -13   -3.02    8.52
   0  11 -12   49.33   18.18
   0 -11  12    8.67    6.74
   0  11 -11   78.41   85.54
   0  11 -11   65.37   25.76
   0 -11  11   46.36   15.96
   0  11 -10   16.61   11.61
   0  11 -10   28.99   14.03
   0 -11  10   -8.78    4.58
   0  11  -9  236.37   26.76
   0  11  -9  256.38   32.49
   0  11  -9  222.55   27.15
   0 -11   9  254.02   28.38
   0  11  -8   -3.09    6.39
   0  11  -8   25.21   13.84
   0  11  -8    4.62    7.38
   0 -11   8   10.37    7.57
   0 -11   8   33.24   12.28
   0  11  -7  219.33   25.76
   0  11  -7  138.80   33.14
   0 -11   7  173.40   37.73
   0 -11   7  208.69   23.04
   0  11  -6  100.50   29.93
   0  11  -6   80.03   25.44
   0 -11   6   80.55   21.73
   0 -11   6   95.00   25.69
   0  11  -5   13.79   10.25
   0  11  -5   29.38   13.77
   0 -11   5   16.39    8.04
   0 -11   5   -2.63    8.79
   0  11  -4   75.24   21.27
   0  11  -4   95.99   27.68
   0 -11   4   67.97   23.01
   0 -11   4   81.26   22.95
   0  11  -3   86.78   25.49
   0  11  -3   71.98   20.40
   0 -11   3   83.57   21.58
   0 -11   3  103.92   28.96
   0  11  -2   55.90   21.30
   0  11  -2   57.37   19.75
   0 -11   2   50.61   18.36
   0  11  -1  106.16   29.63
   0  11  -1   90.75   25.25
   0 -11   1   81.53   27.49
   0  11   0   82.77   30.31
   0  11   0   80.27   28.93
   0 -11   0   61.73   20.88
   0 -11   0   55.49   19.15
   0 -11   0   42.79   16.49
   0  11   1  120.92   29.15
   0  11   1  149.09   36.23
   0 -11  -1   69.33   26.16
   0 -11  -1  103.55   22.13
   0 -11  -1  105.25   25.06
   0  11   2   33.05   19.40
   0  11   2   12.40    9.85
   0 -11  -2    5.55    4.05
   0 -11  -2   30.61   14.22
   0  11   3   28.98   15.86
   0  11   3    9.43    7.75
   0 -11  -3    3.31    3.28
   0 -11  -3   11.93   10.35
   0  11   4  391.08  355.49
   0  11   4  384.48  349.04
   0 -11  -4  381.64  344.32
   0 -11  -4  314.77   67.91
   0  11   5  -13.03    9.88
   0  11   5   27.34   15.49
   0 -11  -5    6.97    7.89
   0 -11  -5   23.29   12.88
   0  11   6   10.05    9.30
   0  11   6   10.11    9.14
   0 -11  -6   11.79    9.83
   0 -11  -6    7.27    8.59
   0 -11  -7   27.62   16.56
   0  11   8   13.77    9.39
   0 -11  -8   -3.73   10.06
   0  11   9   12.06   10.36
   0 -11  -9   21.92   19.66
   0 -11 -10   -4.95   11.55
   0 -11 -11   -3.87   10.45
   0  12 -19   19.22   10.81
   0  12 -18   44.35   21.07
   0  12 -18   12.74   11.47
   0  12 -17   32.46   15.67
   0  12 -17   21.63   15.83
   0  12 -16   24.74   23.97
   0  12 -16   16.80   10.68
   0  12 -15   17.56    9.21
   0  12 -15   10.01   11.11
   0  12 -14    4.30    6.48
   0  12 -14   21.55   14.74
   0  12 -13    8.50    9.30
   0  12 -13    2.21    6.50
   0  12 -12    8.35    9.52
   0  12 -12    4.54    6.64
   0  12 -11   20.18   13.92
   0  12 -11   14.08   10.14
   0  12 -11   15.28   11.88
   0 -12  11   20.48   14.48
   0  12 -10   25.60   29.29
   0  12 -10   -6.55    9.98
   0  12 -10   15.06   10.12
   0 -12  10   -1.09    5.86
   0  12  -9   -0.60    8.64
   0  12  -9    4.22    6.36
   0  12  -9   18.47   12.10
   0 -12   9   13.38   10.33
   0  12  -8  121.92   30.62
   0  12  -8  127.10  122.19
   0 -12   8  117.97   29.42
   0  12  -7   19.47   12.43
   0  12  -7   23.15   11.02
   0 -12   7   -9.82    8.03
   0  12  -6   57.60   22.74
   0  12  -6   57.40   20.27
   0 -12   6   49.16   17.63
   0  12  -5    6.72    6.24
   0  12  -5    5.94    6.80
   0 -12   5    2.50    2.63
   0 -12   5   -3.91    8.95
   0  12  -4  267.11   37.97
   0  12  -4  227.54   28.99
   0 -12   4  244.98   34.93
   0  12  -3   -0.57    7.95
   0  12  -3   -8.37    8.71
   0 -12   3   10.91    9.78
   0  12  -2   89.96   22.65
   0  12  -2   75.68   20.49
   0 -12   2   42.47   16.83
   0  12  -1  159.19   19.11
   0  12  -1  172.89   18.96
   0 -12   1  155.88   29.29
   0  12   0   16.72   11.89
   0  12   0   -9.00    8.89
   0 -12   0  -21.11   11.11
   0  12   1   17.41   14.23
   0  12   1    7.79    7.87
   0 -12  -1    6.75    8.87
   0  12   2   21.29   14.70
   0  12   2   -6.15    9.82
   0 -12  -2   21.01   15.17
   0  12   3   13.41   12.76
   0  12   3    0.38    4.83
   0 -12  -3    7.72   11.18
   0  12   4   12.77   11.91
   0  12   4   40.04   15.94
   0 -12  -4   24.80   14.36
   0  12   5  112.89   24.49
   0  12   5  145.75   32.46
   0 -12  -5   85.14   18.98
   0 -12  -6   35.20   18.67
   0 -12  -7   29.75   19.48
   0  12   8   26.22   15.76
   0 -12  -8   51.45   20.20
   0 -12  -9   -3.58   12.05
   0 -12 -10    9.78   10.40
   0  13 -18   14.82    6.98
   0  13 -17   27.89   15.32
   0  13 -17   12.56    5.61
   0  13 -16   80.22   29.94
   0  13 -15   37.71   19.05
   0  13 -15   54.60   26.85
   0  13 -15   11.18   11.44
   0  13 -14   20.17    9.68
   0  13 -14   -1.83    9.92
   0  13 -14   38.67   20.15
   0  13 -13   33.47   19.39
   0  13 -13   62.53   20.88
   0  13 -13   45.46   25.08
   0  13 -12   -8.57    9.04
   0  13 -12   16.63   11.68
   0  13 -12   18.90   12.86
   0  13 -11   20.85   11.46
   0  13 -11   19.88   11.82
   0  13 -11   29.84   17.44
   0 -13  11    7.42    7.50
   0  13 -10   29.26   16.57
   0  13 -10   53.18   37.78
   0  13 -10   46.40   19.30
   0 -13  10   34.12   18.01
   0  13  -9   20.27   14.48
   0  13  -9   24.48   13.18
   0 -13   9  -10.97    6.77
   0  13  -8   20.99   12.22
   0  13  -8   14.39   11.94
   0 -13   8   -1.30    7.97
   0  13  -7   78.46   85.80
   0  13  -7   60.92   20.30
   0 -13   7  136.55   18.12
   0  13  -6   12.52    9.50
   0  13  -6    8.08   10.47
   0 -13   6    4.28    6.36
   0  13  -5   -8.21    7.55
   0  13  -5   18.48   11.67
   0 -13   5   17.76   11.18
   0  13  -4   21.60   11.97
   0  13  -4   22.24   13.49
   0 -13   4   10.79    8.88
   0  13  -3  -13.64    8.36
   0  13  -3  -14.38    9.77
   0 -13   3   18.14   11.45
   0  13  -2   16.96   11.33
   0  13  -2   28.12   13.79
   0 -13   2    2.28    5.63
   0  13  -1  143.45   25.28
   0  13  -1  136.25   22.52
   0 -13   1   75.15   20.75
   0  13   0   21.26   14.95
   0  13   0   16.13   12.32
   0 -13   0  -11.54   12.08
   0  13   1   24.80   14.52
   0  13   1   44.33   18.31
   0 -13  -1    4.03    9.01
   0  13   2   19.35   13.40
   0  13   2   38.66   16.70
   0 -13  -2   38.62   16.99
   0  13   3   32.16   16.42
   0  13   3   44.58   21.55
   0 -13  -3   13.62   13.98
   0  13   4   14.55   13.73
   0 -13  -4   40.33   22.10
   0  13   5  124.50   36.31
   0 -13  -5   54.78   26.08
   0 -13  -6   -4.58   13.64
   0 -13  -7   -3.73   11.56
   0 -13  -8   28.89   15.74
   0  14 -17   18.06   11.08
   0  14 -17   22.90   13.20
   0  14 -16   11.19   10.99
   0  14 -16   32.29   19.69
   0  14 -15    4.82    7.47
   0  14 -15    3.62    6.93
   0  14 -14   12.22   12.12
   0  14 -14   -0.66    9.32
   0  14 -13  103.20   32.50
   0  14 -13  112.42   32.59
   0  14 -12   40.60   20.38
   0  14 -12   39.56   19.69
   0  14 -11   54.35   19.17
   0  14 -11   41.06   19.85
   0 -14  11   35.71   17.51
   0  14 -10  152.22   37.90
   0  14 -10  217.86   41.24
   0 -14  10  122.16   26.41
   0  14  -9   94.28   18.90
   0  14  -9  113.85   20.67
   0 -14   9   57.69   27.85
   0  14  -8  111.53   37.88
   0  14  -8  180.56   32.68
   0 -14   8   80.07   28.30
   0  14  -7   83.34   58.56
   0  14  -7   84.60   60.63
   0 -14   7   42.98   18.84
   0  14  -6    7.99    8.32
   0  14  -6    9.66   10.13
   0 -14   6   25.97   14.70
   0  14  -5   31.31   16.67
   0  14  -5   74.11   26.39
   0 -14   5   33.14   18.20
   0  14  -4   30.42   16.98
   0  14  -4   41.90   17.25
   0 -14   4   22.64   13.68
   0  14  -3   25.25   13.69
   0  14  -3   25.66   14.06
   0 -14   3   27.81   16.77
   0  14  -2   28.05   16.17
   0  14  -2   33.23   17.88
   0 -14   2   32.93   19.98
   0  14  -1   16.50   12.60
   0  14  -1   16.00   11.24
   0 -14   1   18.26   14.05
   0  14   0   39.33   18.36
   0  14   0   57.65   21.98
   0 -14   0   24.72   18.07
   0  14   1   22.76   16.99
   0  14   1    5.25    8.81
   0 -14  -1   11.59   12.08
   0  14   2   30.06   15.97
   0 -14  -2   47.81   25.42
   0  14   3   -1.27   11.73
   0 -14  -3   24.11   16.66
   0  14   4   19.93   13.20
   0 -14  -4  -19.05   12.76
   0  14   5   23.41   16.00
   0 -14  -5  -10.38   13.72
   0 -14  -6   -0.81   12.56
   0  14   7   23.62   11.87
   0 -14  -7   13.55    7.84
   0  15 -16   19.40   11.23
   0  15 -16    7.52    9.86
   0  15 -15    9.48    9.65
   0  15 -15   48.42   22.47
   0  15 -14    7.80    9.75
   0  15 -14   -2.46   10.51
   0  15 -13    6.44    8.04
   0  15 -13   22.21   16.67
   0  15 -12   26.81   15.88
   0  15 -12   15.00   13.24
   0  15 -11   24.31   17.99
   0  15 -11  -14.63   10.33
   0  15 -10    6.95    8.08
   0  15 -10   19.97    9.21
   0 -15  10   21.77   13.99
   0  15  -9    5.56    9.02
   0  15  -9   16.58   11.70
   0 -15   9    9.16    8.70
   0  15  -8   33.80   18.70
   0  15  -8   27.28   15.22
   0  15  -7   21.33   15.07
   0  15  -7   21.43   14.95
   0 -15   7   33.30   17.39
   0  15  -6   49.69   22.85
   0  15  -6   57.54   22.27
   0 -15   6   23.31   16.15
   0  15  -5   49.85   22.45
   0  15  -5   46.32   22.10
   0 -15   5   41.30   21.77
   0  15  -4   13.99   11.88
   0  15  -4   21.52   14.90
   0 -15   4   16.76   13.33
   0  15  -3    3.21    5.41
   0  15  -3   12.40    9.63
   0 -15   3   26.94   15.43
   0  15  -2   24.07   17.37
   0  15  -2    5.13    6.15
   0 -15   2   28.14   16.37
   0  15  -1   22.86   16.54
   0  15  -1   -2.69    9.63
   0 -15   1  -27.61   11.56
   0  15   0  -21.04    8.88
   0  15   0    8.80    9.18
   0 -15   0   15.69   12.01
   0  15   1   29.34   14.57
   0 -15  -1   33.17   18.79
   0  15   2   -7.82   10.79
   0 -15  -2   -7.96   12.30
   0  15   3   42.21   16.36
   0 -15  -3   44.61   18.79
   0  15   4   83.19   38.96
   0 -15  -4   58.20   34.57
   0  15   5   13.48    9.62
   0 -15  -5   18.83   10.68
   0  16 -15    7.67    9.20
   0  16 -14   37.85   17.33
   0  16 -14   17.18   11.30
   0  16 -13   23.52   14.28
   0  16 -13  -11.76   10.98
   0  16 -12   21.13   15.97
   0  16 -12   39.35   16.75
   0  16 -11   22.71   16.78
   0  16 -11   23.31   16.90
   0  16 -10   11.13   10.01
   0  16 -10    1.58    4.96
   0 -16  10   25.21   15.15
   0  16  -9   15.66   13.96
   0  16  -9   -7.97   10.15
   0 -16   9   17.78   12.07
   0  16  -8   46.25   22.92
   0  16  -8   47.22   20.55
   0 -16   8   -0.17    8.38
   0  16  -7   35.92   21.91
   0  16  -7   -8.82   10.56
   0 -16   7   -1.46    9.43
   0  16  -6   16.70   14.85
   0 -16   6    8.23    9.79
   0  16  -5  100.78   29.96
   0  16  -5  104.10   31.07
   0 -16   5   49.35   22.93
   0  16  -4   21.11   10.70
   0  16  -4    0.24    6.54
   0 -16   4   24.30   16.24
   0  16  -3   36.11   16.64
   0 -16   3   18.33   12.97
   0  16  -2   61.30   24.80
   0  16  -2   46.70   20.83
   0 -16   2   36.53   18.36
   0  16  -1   14.95   13.27
   0 -16   1    7.54   10.04
   0  16   0    0.42    4.94
   0 -16   0   -0.84   13.80
   0  16   1   99.94   44.00
   0 -16  -1   49.29   23.10
   0  16   2   82.69   36.80
   0 -16  -2   43.25   25.26
   0  16   3   33.00   23.76
   0 -16  -3  -13.04   11.76
   0  17 -13   30.70   18.26
   0  17 -12   10.56   11.67
   0  17 -12   25.02   12.34
   0  17 -11   40.30   20.81
   0  17 -11   49.35   25.76
   0  17 -10   15.32   15.75
   0  17 -10   21.84   13.68
   0  17  -9    5.13    7.33
   0  17  -9   18.20   13.63
   0 -17   9   16.68   15.04
   0  17  -8   22.04   15.34
   0  17  -8   26.00   16.29
   0 -17   8    8.54    9.76
   0  17  -7   12.93   12.60
   0  17  -7   58.25   22.51
   0  17  -6   -4.63   11.31
   0 -17   6   21.18   16.14
   0  17  -5   65.60   22.67
   0  17  -5   93.41   36.28
   0 -17   5   59.38   21.86
   0  17  -4   63.07   23.31
   0  17  -4   51.64   18.72
   0 -17   4   37.35   14.92
   0  17  -3   38.26   18.02
   0 -17   3   15.79   14.22
   0  17  -2   59.57   30.90
   0 -17   2   21.65   14.54
   0  17  -1    8.35    8.98
   0 -17   1   31.01   22.12
   0  17   0   22.49   12.36
   0 -17   0   31.34   18.23
   0  17   1   -3.22    8.78
   0  18 -12    4.32    6.02
   0  18 -11   13.35    7.55
   0  18 -10   37.00   17.82
   0  18  -9    0.38    5.02
   0  18  -8    9.26   10.74
   0  18  -8   -5.84    9.88
   0 -18   8  -15.55    8.25
   0  18  -7   15.06    7.06
   0  18  -7   38.45   17.64
   0 -18   7   22.29   11.19
   0  18  -6   -9.94    9.91
   0 -18   6   -1.92    8.93
   0  18  -5   -5.25   10.04
   0 -18   5   12.50   12.94
   0  18  -4   52.57   25.61
   0 -18   4   16.41   11.20
   0 -18   3   27.52   18.49
   0 -19   7   -3.12    7.51
   1 -19   7   15.52    6.90
  -1  19  -8   25.52   13.41
   1 -19   8   86.74   38.05
  -1  19  -9    9.31   11.15
   1 -18   3   11.70   10.92
  -1  18  -4    8.80   11.13
   1 -18   4   23.41   14.27
  -1  18  -5   -0.86    9.55
  -1  18  -5   -1.52    4.72
  -1  18  -6  -10.21    9.32
  -1  18  -6    4.66    8.23
   1 -18   6   15.59    7.04
  -1  18  -7    1.18    5.28
  -1  18  -7   22.76   13.74
   1 -18   7   -9.13    7.89
  -1  18  -8   13.93    5.82
  -1  18  -8    4.15    7.37
   1 -18   8    9.10   11.31
  -1  18  -9   12.83   12.36
  -1  18  -9   25.22   12.92
   1 -18   9   10.55   10.00
  -1  18 -10   23.36   13.03
  -1  18 -11    1.66    6.41
  -1  17   1   24.51   13.02
  -1  17   0   13.60    5.90
   1 -17   0  -14.48   11.03
  -1  17  -1   39.42   20.55
   1 -17   1   24.08   17.02
  -1  17  -2   14.00    6.69
   1 -17   2   -4.39   10.72
  -1  17  -3   33.67   18.91
   1 -17   3    6.03    8.79
  -1  17  -4   84.57   31.03
  -1  17  -4   71.99   25.00
   1 -17   4   48.61   19.34
  -1  17  -5   23.03   17.34
  -1  17  -5    8.82   11.00
   1 -17   5   21.93   16.28
  -1  17  -6    7.22    8.83
  -1  17  -6   54.96   19.59
   1 -17   6   13.18   13.75
  -1  17  -7   11.75   10.24
  -1  17  -7   13.31   11.42
   1 -17   7   23.45   16.98
  -1  17  -8   23.17   17.49
  -1  17  -8   32.33   17.42
   1 -17   8   32.10   19.45
  -1  17  -9   -3.94   10.62
  -1  17  -9   16.80   16.35
   1 -17   9    2.63    6.25
  -1  17 -10   -8.48   10.61
  -1  17 -10    1.41    8.31
  -1  17 -11   13.89    9.08
  -1  17 -11   28.04   16.99
  -1  17 -12   24.53   12.96
  -1  17 -12   28.13   15.85
  -1  17 -13    1.15    5.41
  -1  16   3   -9.14   10.18
   1 -16  -3   -6.22   11.61
  -1  16   2   26.11   16.75
   1 -16  -2   39.33   21.95
  -1  16   1    5.45    8.96
   1 -16  -1    0.75    6.38
  -1  16   0   26.54   14.48
   1 -16   0   31.18   18.90
  -1  16  -1  112.57   41.45
  -1  16  -1   56.37   24.04
   1 -16   1   74.45   29.48
  -1  16  -2   22.29   14.22
  -1  16  -2   42.50   19.55
   1 -16   2   36.45   17.29
  -1  16  -3   17.77    8.82
  -1  16  -3    6.33    8.72
   1 -16   3   -0.46   11.28
  -1  16  -4  -12.56   11.89
  -1  16  -4   19.11    9.77
  -1  16  -5  -18.33   11.54
  -1  16  -5   13.78   10.38
   1 -16   5   -2.12    8.54
  -1  16  -6   23.05   16.44
  -1  16  -6   30.08   17.54
   1 -16   6   29.23   17.32
  -1  16  -7   68.01   24.54
  -1  16  -7   73.97   21.68
   1 -16   7   60.38   26.54
  -1  16  -8   40.59   21.35
  -1  16  -8   36.73   19.47
   1 -16   8    7.83    8.81
  -1  16  -9    5.76    7.36
  -1  16  -9   15.63   14.48
   1 -16   9   -7.72    7.82
  -1  16 -10   35.96   17.27
  -1  16 -10   48.26   22.58
   1 -16  10   39.74   17.46
  -1  16 -11    9.70   15.38
  -1  16 -11   42.76   16.73
  -1  16 -12   19.23   12.87
  -1  16 -12   20.92   14.45
  -1  16 -13   -8.39   11.19
  -1  16 -13   -5.96    7.89
  -1  16 -14   41.32   23.03
  -1  16 -14    4.51    8.19
  -1  15   5   66.64   32.27
   1 -15  -5   52.34   24.74
  -1  15   4    7.43    8.68
   1 -15  -4   17.24   14.13
  -1  15   3   34.28   17.84
   1 -15  -3   -8.00   13.20
  -1  15   2   73.18   24.84
   1 -15  -2    9.63   12.75
  -1  15   1   29.79   19.47
  -1  15   1    7.25    9.23
   1 -15  -1  -15.83   12.93
  -1  15   0   24.52   17.85
  -1  15   0   16.42   11.52
   1 -15   0   55.74   25.93
  -1  15  -1  102.63   29.55
  -1  15  -1  113.99   29.82
   1 -15   1  114.07   29.23
  -1  15  -2   16.85   13.09
  -1  15  -2   22.49   16.23
   1 -15   2   29.74   17.25
  -1  15  -3   17.21   12.77
  -1  15  -3   11.67   10.01
   1 -15   3   -6.03   11.57
  -1  15  -4   92.33   19.72
  -1  15  -4   77.02   29.51
   1 -15   4   42.12   18.45
  -1  15  -5   -7.85   10.68
  -1  15  -5    8.46    7.69
   1 -15   5    1.24    6.81
  -1  15  -6   17.31   12.48
  -1  15  -6   10.57   11.55
   1 -15   6   20.38   14.57
  -1  15  -7   14.74   13.29
  -1  15  -7   22.01   14.87
   1 -15   7   23.13   16.76
  -1  15  -8   18.34   13.19
  -1  15  -8    9.06    9.07
   1 -15   8    7.91    9.10
  -1  15  -9    4.13    9.40
  -1  15  -9   -0.97    9.59
   1 -15   9   14.90   11.59
  -1  15 -10  105.84   34.54
  -1  15 -10   73.44   22.20
   1 -15  10   40.37   20.10
  -1  15 -11   78.13   23.32
  -1  15 -11   66.37   30.13
  -1  15 -12   17.98   14.13
  -1  15 -12   46.45   20.68
  -1  15 -13   52.65   24.54
  -1  15 -13   28.58   25.09
  -1  15 -14   -2.43    9.69
  -1  15 -14  -11.31    9.86
  -1  15 -15    0.04    5.21
  -1  15 -15    6.15    8.83
  -1  15 -16   27.76   15.14
   1 -14  -7   -5.71   11.54
   1 -14  -6    1.02    5.57
  -1  14   5    0.57    7.12
   1 -14  -5   -0.92   13.23
  -1  14   4   24.01   16.00
   1 -14  -4   36.13   20.59
  -1  14   3   46.84   23.15
  -1  14   3   26.93   14.93
   1 -14  -3   33.54   19.27
  -1  14   2   55.81   23.46
  -1  14   2   44.36   21.80
   1 -14  -2   42.79   22.38
  -1  14   1   59.62   21.60
  -1  14   1   31.23   17.89
   1 -14  -1   28.63   16.58
  -1  14   0  312.64   62.88
  -1  14   0  345.29   68.12
   1 -14   0  272.57   65.15
  -1  14  -1   -1.02    5.61
  -1  14  -1    9.98   11.13
   1 -14   1   -5.68   11.45
  -1  14  -2   51.41   19.91
  -1  14  -2   16.98    9.54
  -1  14  -3  229.92   41.45
  -1  14  -3  335.27   56.59
   1 -14   3  241.09   49.79
  -1  14  -4   16.14   11.29
  -1  14  -4   -4.86   10.06
   1 -14   4   -6.05   11.53
  -1  14  -5   28.78   15.46
  -1  14  -5   28.41   14.96
   1 -14   5   28.04   14.56
  -1  14  -6   -3.33   10.46
  -1  14  -6   -4.53   10.21
   1 -14   6   -3.99    9.82
  -1  14  -7    4.13    7.68
  -1  14  -7   17.49    9.92
   1 -14   7    9.03   10.07
  -1  14  -8   15.22   10.84
  -1  14  -8   34.61   19.04
   1 -14   8   20.06   11.56
  -1  14  -9  -20.33   10.68
  -1  14  -9   15.25   10.59
   1 -14   9   11.26    8.01
  -1  14 -10   12.45   10.83
  -1  14 -10    3.28    4.13
   1 -14  10  -13.00    5.95
  -1  14 -11   25.17   18.10
  -1  14 -11   11.47   10.15
   1 -14  11    9.42    8.24
  -1  14 -12   43.62   23.25
  -1  14 -12   -0.99    9.87
  -1  14 -12  -18.19    8.12
  -1  14 -13   33.68   17.14
  -1  14 -13  -18.67    9.14
  -1  14 -13   -3.89    8.02
  -1  14 -14   23.43   15.66
  -1  14 -14   -3.34    6.14
  -1  14 -14   -7.27    8.60
  -1  14 -15   19.64   13.59
  -1  14 -15   42.37   17.57
  -1  14 -15   15.01   12.97
  -1  14 -16    1.50    5.50
  -1  14 -16   21.43   14.03
  -1  14 -16   10.73   10.03
  -1  14 -17   16.07   10.00
   1 -13  -9   57.78   27.40
   1 -13  -8   18.40   14.86
   1 -13  -7    8.45   10.95
   1 -13  -6  -11.69   13.33
  -1  13   5   -0.82    9.27
  -1  13   5   18.08    9.41
   1 -13  -5   25.57   19.46
  -1  13   4   11.18   10.00
  -1  13   4   12.19   15.10
   1 -13  -4  -11.20   12.61
  -1  13   3   25.56   17.30
  -1  13   3  107.41   23.72
   1 -13  -3   49.69   23.47
  -1  13   2   15.87   11.29
  -1  13   2   22.68   13.51
   1 -13  -2   10.16   10.28
  -1  13   1   29.75   16.18
  -1  13   1  -16.17   10.28
   1 -13  -1  -20.76   11.22
  -1  13   0   20.95   15.41
  -1  13   0   -0.78    9.76
   1 -13   0   -7.14   11.07
  -1  13  -1   12.02    9.80
  -1  13  -1   19.27   13.41
   1 -13   1   10.73   13.37
  -1  13  -2   25.83   12.37
  -1  13  -2   31.46   14.37
   1 -13   2   -2.24    9.88
  -1  13  -3  267.32   31.32
  -1  13  -3  287.68   28.44
   1 -13   3  248.44   28.14
  -1  13  -4  128.87   33.68
  -1  13  -4  145.62   16.91
   1 -13   4  126.55   34.91
  -1  13  -5   17.60   11.79
  -1  13  -5   30.71   14.01
   1 -13   5   41.33   17.44
  -1  13  -6  688.61   75.88
  -1  13  -6  718.73  779.37
   1 -13   6  691.20   68.18
  -1  13  -7   25.41   28.03
  -1  13  -7  -27.31    9.87
   1 -13   7   12.32    9.94
  -1  13  -8   22.23   12.47
  -1  13  -8    9.68    8.05
   1 -13   8   19.30   12.55
  -1  13  -9   20.99   14.77
  -1  13  -9   28.80   14.62
   1 -13   9   28.22   13.05
  -1  13 -10  -11.86    8.81
  -1  13 -10   22.70   12.92
   1 -13  10    6.64    7.83
  -1  13 -11   31.08   16.92
  -1  13 -11   24.01   14.02
  -1  13 -11   40.32   18.24
   1 -13  11    2.10    4.12
  -1  13 -12   37.14   42.07
  -1  13 -12   41.67   17.72
  -1  13 -12    8.00   14.11
  -1  13 -13   47.97   26.00
  -1  13 -13   44.88   22.08
  -1  13 -13    7.64   10.60
  -1  13 -14   55.36   25.01
  -1  13 -14   40.21   20.70
  -1  13 -14   30.81   18.25
  -1  13 -15   33.79   15.45
  -1  13 -15   -5.31   10.08
  -1  13 -15   50.41   23.80
  -1  13 -16   58.65   20.50
  -1  13 -16   13.03   11.96
  -1  13 -16   -3.50    9.96
  -1  13 -17   -0.48    9.25
  -1  13 -17  -11.57    8.60
  -1  13 -17   13.01    4.81
  -1  13 -18   18.06   11.74
   1 -12 -10   19.58   12.44
   1 -12  -9   17.91   13.39
  -1  12   8   22.62   15.62
   1 -12  -8   51.46   19.26
   1 -12  -7   48.87   22.58
  -1  12   6  192.94   56.10
   1 -12  -6  124.38   39.26
  -1  12   5   34.25   16.52
  -1  12   5   43.46   18.44
   1 -12  -5   22.25   16.11
  -1  12   4   40.76   18.32
  -1  12   4   42.27   16.65
   1 -12  -4   24.53   12.73
   1 -12  -4   53.09   39.77
  -1  12   3   28.19   14.72
  -1  12   3   11.68   11.91
   1 -12  -3   -1.57    3.26
   1 -12  -3    8.67    7.90
  -1  12   2   68.39   25.63
  -1  12   2   88.08   22.62
   1 -12  -2   69.45   23.42
   1 -12  -2   36.45   15.64
  -1  12   1    5.42    8.89
  -1  12   1   36.24   13.57
   1 -12  -1    9.23    6.51
   1 -12  -1   14.47   15.66
  -1  12   0   80.64   21.04
  -1  12   0  146.85   17.71
   1 -12   0  115.68   25.90
   1 -12   0  122.76   32.16
  -1  12  -1   54.92   21.00
  -1  12  -1   51.91   20.02
   1 -12   1   37.04   14.14
   1 -12   1   31.96   14.39
  -1  12  -2   -8.47    7.67
   1 -12   2   26.31   13.36
   1 -12   2   -0.52    9.64
  -1  12  -3   65.28   25.25
  -1  12  -3   37.00   14.47
   1 -12   3   35.49   12.47
   1 -12   3   50.87   20.01
  -1  12  -4  120.17   32.04
  -1  12  -4  100.02   25.08
   1 -12   4   84.34   21.97
   1 -12   4  143.44   35.68
  -1  12  -5   43.52   17.38
  -1  12  -5   52.70   19.55
   1 -12   5   49.10   17.30
   1 -12   5   45.74   17.26
  -1  12  -6    5.98    6.37
  -1  12  -6    3.42    5.60
   1 -12   6    3.57    3.77
   1 -12   6   12.51    8.51
  -1  12  -7   29.74   14.78
  -1  12  -7   18.61   11.51
   1 -12   7   17.68   12.65
  -1  12  -8   53.47   20.36
  -1  12  -8   35.90   14.30
   1 -12   8   37.49   13.78
  -1  12  -9   81.94   21.39
  -1  12  -9   46.84   16.73
  -1  12  -9   31.12   15.09
   1 -12   9   52.90   18.44
  -1  12 -10   19.54   11.64
  -1  12 -10   52.03   19.41
  -1  12 -10   19.48   11.12
   1 -12  10   29.16   12.75
  -1  12 -11   62.89   19.58
  -1  12 -11  103.33   26.60
  -1  12 -11   77.57   20.69
   1 -12  11   59.65   20.10
  -1  12 -12   43.17   18.20
  -1  12 -12   51.45   20.57
  -1  12 -12   28.42   15.71
   1 -12  12   45.78   17.65
  -1  12 -13   53.69   22.51
  -1  12 -13   16.74   11.23
  -1  12 -14   15.78   16.63
  -1  12 -14   14.87   12.33
  -1  12 -14   21.33   16.18
  -1  12 -15   14.64   11.73
  -1  12 -15   -6.71   10.49
  -1  12 -16   30.88   14.26
  -1  12 -16   49.16   21.58
  -1  12 -17   13.79    7.43
  -1  12 -17    9.06   14.61
  -1  12 -18    4.69    6.40
  -1  12 -18   19.39   12.30
  -1  12 -19   18.64   11.17
   1 -11 -12   -6.24    9.12
   1 -11 -11    6.69   11.21
   1 -11 -10    5.11    7.67
   1 -11  -9   29.44   14.09
  -1  11   8   42.38   22.37
  -1  11   8   21.80   13.51
   1 -11  -8   39.28   21.79
  -1  11   7   13.30   13.05
   1 -11  -7   25.24   17.47
   1 -11  -7   46.33   22.81
  -1  11   6   24.59   17.52
  -1  11   6   20.19   13.77
   1 -11  -6   20.92   16.57
   1 -11  -6   35.42   16.11
  -1  11   5   54.29   21.62
  -1  11   5   65.46   22.35
   1 -11  -5   25.53   17.52
   1 -11  -5   20.11   15.88
  -1  11   4   14.93   10.83
  -1  11   4   35.15   15.51
   1 -11  -4   23.89   13.19
   1 -11  -4   22.42   12.73
  -1  11   3  140.09   20.07
  -1  11   3  156.07   14.57
   1 -11  -3  127.98  122.88
   1 -11  -3  161.52   21.68
  -1  11   2   48.59   19.53
  -1  11   2    5.26    6.73
   1 -11  -2    3.24    2.38
   1 -11  -2    9.52    7.66
  -1  11   1   29.73   16.37
  -1  11   1  -12.87    8.17
   1 -11  -1   -2.63    3.77
   1 -11  -1    4.34    4.67
   1 -11  -1   11.57    9.73
  -1  11   0   24.01   13.68
  -1  11   0   33.12   12.09
   1 -11   0   12.98    8.12
   1 -11   0   20.56   10.43
   1 -11   0   25.02   13.98
  -1  11  -1   73.42   21.91
  -1  11  -1   50.89   18.52
   1 -11   1   55.65   18.92
   1 -11   1   45.57   16.49
   1 -11   1   81.51   23.72
  -1  11  -2    1.09    4.29
   1 -11   2    3.16    2.85
   1 -11   2   -5.56    8.79
  -1  11  -3   30.01   12.72
  -1  11  -3   26.47   26.71
   1 -11   3   27.31   11.17
   1 -11   3   23.16   11.70
  -1  11  -4   26.16   26.58
  -1  11  -4   45.80   17.43
   1 -11   4    6.47    5.47
   1 -11   4    9.39    7.68
  -1  11  -5  353.99   36.80
  -1  11  -5  299.09   38.52
   1 -11   5  258.46   20.69
   1 -11   5  303.15   30.83
  -1  11  -6   -5.57    9.40
  -1  11  -6   21.99   12.33
   1 -11   6   14.48   14.50
   1 -11   6   22.15   11.70
  -1  11  -7   12.48   10.14
  -1  11  -7    8.42    6.84
   1 -11   7    2.29    2.11
   1 -11   7    4.16    5.22
  -1  11  -8   -0.67    9.93
  -1  11  -8   30.39   12.52
  -1  11  -8   12.24    9.03
   1 -11   8   31.00   11.70
  -1  11  -9   14.15    9.34
  -1  11  -9    0.19    4.99
  -1  11  -9   -2.63    9.07
   1 -11   9   16.21    9.42
  -1  11 -10   12.40    9.44
   1 -11  10   19.46   13.05
  -1  11 -10  -13.55    8.80
  -1  11 -10   14.97   12.67
   1 -11  10    0.71    5.46
  -1  11 -11   85.19   22.68
   1 -11  11   72.69   23.38
  -1  11 -11   68.86   22.87
  -1  11 -11   78.74   85.91
   1 -11  11   66.15   21.01
   1 -11  12   68.79   18.87
  -1  11 -12   44.27   14.07
  -1  11 -12   59.25   18.40
   1 -11  12   38.66   16.99
   1 -11  13   -9.12    9.20
  -1  11 -13   28.34   15.16
  -1  11 -13    5.02    8.38
   1 -11  14  122.43   29.63
  -1  11 -14  103.75   21.51
  -1  11 -14   92.10   29.49
   1 -11  15   20.50   14.59
  -1  11 -15   13.69   10.99
  -1  11 -15   17.74   12.17
  -1  11 -16   21.81   14.31
  -1  11 -16   29.85   14.25
  -1  11 -17   46.71   17.30
  -1  11 -17   11.86   11.97
  -1  11 -18   16.41   14.61
  -1  11 -18   18.87   14.10
  -1  11 -19   13.74    6.11
  -1  11 -19   21.21   12.41
   1 -10 -13   15.74    9.25
   1 -10 -12   30.76   19.15
   1 -10 -11   22.45   16.15
   1 -10 -10    0.66    3.38
   1 -10 -10   31.32   16.43
  -1  10   9   20.62    9.50
  -1  10   9   10.50    8.89
   1 -10  -9   16.87    8.40
  -1  10   8  190.69   44.99
   1 -10  -8  132.20   32.49
   1 -10  -8  130.72   27.71
  -1  10   7   25.28   14.25
   1 -10  -7    7.47    7.40
   1 -10  -7   -7.71   10.60
  -1  10   6  -20.62   11.26
  -1  10   6  -22.78   10.76
   1 -10  -6   13.85    9.64
   1 -10  -6   18.01   12.44
  -1  10   5  307.38   44.19
  -1  10   5  388.22   49.31
   1 -10  -5  296.17   28.01
   1 -10  -5  285.06   30.60
  -1  10   4    5.04    7.15
  -1  10   4   -8.28   10.19
   1 -10  -4   14.25   10.55
   1 -10  -4   19.62   12.47
  -1  10   3   24.35   13.95
  -1  10   3    5.77    6.87
   1 -10  -3   20.12   10.16
   1 -10  -3   13.10    9.31
  -1  10   2   61.12   21.99
  -1  10   2   75.96   22.34
   1 -10  -2   51.23   19.15
   1 -10  -2   65.30   23.67
  -1  10   1   76.96   21.37
  -1  10   1   46.30   15.91
   1 -10  -1   42.25   14.38
   1 -10  -1   36.13   12.78
  -1  10   0   62.37   22.46
  -1  10   0   51.59   19.31
   1 -10   0   40.06   13.61
   1 -10   0   52.95   17.50
   1 -10   0   53.91   18.82
  -1  10  -1    8.18    7.57
  -1  10  -1   27.70   13.36
   1 -10   1    8.01    6.87
   1 -10   1   -8.71    8.99
  -1  10  -2 1310.61   65.66
  -1  10  -2 1425.36   71.75
   1 -10   2 1387.76   66.94
   1 -10   2 1476.91   73.11
  -1  10  -3   47.70   18.13
  -1  10  -3   52.91   13.63
   1 -10   3   39.21   14.67
   1 -10   3   51.54   13.25
  -1  10  -4  153.02   32.28
  -1  10  -4  145.60   31.12
   1 -10   4  137.46   27.30
   1 -10   4  145.40   28.88
  -1  10  -5  543.80   51.76
  -1  10  -5  572.52   35.52
   1 -10   5  508.84   32.02
   1 -10   5  609.10   49.87
  -1  10  -6  124.17   29.54
  -1  10  -6  174.45   40.86
   1 -10   6  138.68   30.93
   1 -10   6  167.96   37.67
  -1  10  -7   -6.42    9.35
   1 -10   7   28.39   14.29
  -1  10  -7   14.72    9.45
  -1  10  -7    2.56    5.68
   1 -10   7    7.53    5.95
   1 -10   7   14.66    9.06
  -1  10  -8  303.35   35.39
   1 -10   8  281.55   32.59
  -1  10  -8  223.53   29.04
  -1  10  -8  240.61   30.91
   1 -10   8  255.98   22.67
  -1  10  -9  403.90   58.74
   1 -10   9  390.65   54.01
  -1  10  -9  406.99   31.61
  -1  10  -9  418.43   50.39
   1 -10   9  415.79   35.73
   1 -10  10   17.90   13.22
  -1  10 -10   -7.10    9.52
  -1  10 -10   14.48   10.68
   1 -10  10    4.28    4.62
   1 -10  11   75.49   19.35
  -1  10 -11   33.13   14.92
  -1  10 -11   73.78   18.78
   1 -10  11   44.81   16.39
   1 -10  12   -5.88    8.42
  -1  10 -12   15.65   10.77
  -1  10 -12   -7.07   10.01
   1 -10  12    6.90    6.76
   1 -10  13   32.16   15.59
  -1  10 -13   74.25   21.09
  -1  10 -13   69.38   18.49
   1 -10  14   -1.10    6.51
  -1  10 -14   13.58   10.05
  -1  10 -14   28.40   16.35
   1 -10  15   11.23   10.21
  -1  10 -15   19.32   13.04
  -1  10 -15   13.75   11.36
   1 -10  16   20.37    9.77
  -1  10 -16   22.28   14.98
  -1  10 -16   -5.11   10.44
   1 -10  17   30.34   15.39
  -1  10 -17   23.72   15.51
  -1  10 -17   24.27   16.26
  -1  10 -18   -1.25    8.61
  -1  10 -18   18.44   15.87
  -1  10 -19    4.67    7.09
  -1  10 -19   19.01   15.41
   1  -9 -13    5.61    6.96
   1  -9 -13   44.24   20.97
   1  -9 -12   12.00    9.82
   1  -9 -12    2.41    8.21
   1  -9 -11   12.80   11.12
   1  -9 -11   14.61   14.26
  -1   9  10   32.34   17.95
  -1   9  10   15.59   16.15
   1  -9 -10   21.00   15.03
   1  -9 -10   15.58   13.12
  -1   9   9   -2.02   10.60
  -1   9   9    3.03    3.16
   1  -9  -9   18.09   12.27
   1  -9  -9   14.82   12.98
  -1   9   8    5.65    9.07
   1  -9  -8   -3.14    5.14
   1  -9  -8   -6.17   10.27
  -1   9   7   -6.18   11.52
   1  -9  -7   11.43    8.49
   1  -9  -7   18.29   12.91
  -1   9   6   97.77   26.60
  -1   9   6   39.03   14.88
   1  -9  -6   26.15   11.38
   1  -9  -6   75.88   20.11
  -1   9   5  108.78   27.84
  -1   9   5  101.62   24.62
   1  -9  -5   69.33   25.46
   1  -9  -5   61.58   24.34
  -1   9   4   14.03    9.86
  -1   9   4   16.59    9.83
   1  -9  -4   22.80   11.34
  -1   9   3   11.18    9.53
  -1   9   3   -2.77   10.30
   1  -9  -3   10.63    6.29
   1  -9  -3   -3.63   10.84
  -1   9   2  143.64   34.79
  -1   9   2  147.48   36.53
   1  -9  -2  132.02   33.26
   1  -9  -2  119.20   28.69
  -1   9   1   25.44   11.98
  -1   9   1   -5.44    8.24
   1  -9  -1    9.47    5.66
   1  -9  -1   -6.91   10.13
  -1   9   0   19.10   11.83
  -1   9   0   19.88    9.83
   1  -9   0   20.65    7.64
   1  -9   0    7.20    4.29
  -1   9  -1   11.19    7.11
  -1   9  -1   17.31    7.93
   1  -9   1    2.34    2.27
   1  -9   1   -1.16    7.67
  -1   9  -2   -1.42    7.31
  -1   9  -2   13.45    7.04
   1  -9   2    3.27    2.59
   1  -9   2   28.47   11.83
  -1   9  -3  128.21   24.86
  -1   9  -3  133.17   27.15
   1  -9   3  140.62   19.27
   1  -9   3  138.78   24.55
  -1   9  -4   54.70   13.43
  -1   9  -4   68.61   17.57
   1  -9   4   65.84   14.83
   1  -9   4   57.93   15.05
  -1   9  -5  397.83   30.66
  -1   9  -5  364.35   27.69
   1  -9   5  376.16   25.10
   1  -9   5  417.70   38.74
  -1   9  -6   -0.74    7.54
   1  -9   6   11.81    8.57
  -1   9  -6  -10.61    7.27
  -1   9  -6   -0.74    8.47
   1  -9   6    7.87    3.92
   1  -9   6   -0.69    5.26
  -1   9  -7   14.92    8.95
   1  -9   7   16.07    9.70
  -1   9  -7   30.50   12.73
  -1   9  -7    7.09    6.40
   1  -9   7   10.32    5.98
   1  -9   7   -4.32    5.75
   1  -9   8  113.30   24.54
  -1   9  -8   70.54   20.91
  -1   9  -8  112.18   23.38
   1  -9   8  121.57   25.02
   1  -9   9   64.51   16.87
  -1   9  -9   54.64   18.98
  -1   9  -9   54.72   20.02
   1  -9   9   56.00   18.61
   1  -9  10   73.00   21.86
  -1   9 -10  125.32   31.95
  -1   9 -10   93.30   26.87
   1  -9  10   90.67   25.03
   1  -9  11   46.31   18.06
  -1   9 -11   55.98   21.23
  -1   9 -11   36.38   14.02
   1  -9  11   22.19   12.34
   1  -9  12   92.52   24.87
  -1   9 -12   68.52   26.37
  -1   9 -12   83.33   25.47
   1  -9  12   31.30   15.50
   1  -9  13  115.77   29.96
  -1   9 -13  130.69   35.35
  -1   9 -13   98.22   24.68
   1  -9  14   39.75   16.26
  -1   9 -14   45.44   16.36
  -1   9 -14   32.29   15.99
   1  -9  15    9.23    8.86
  -1   9 -15  -12.79    9.16
  -1   9 -15   24.75   17.28
   1  -9  16    6.16    7.07
  -1   9 -16   16.25   11.86
  -1   9 -16   16.04   11.67
   1  -9  17    8.09    8.70
  -1   9 -17   16.52   11.31
  -1   9 -17   18.41   12.38
  -1   9 -18   12.30   10.73
  -1   9 -18    0.83   12.20
  -1   9 -19    8.58    9.13
  -1   9 -19   20.04   11.31
   1  -8 -15   25.82   13.06
   1  -8 -14   -4.81    6.08
   1  -8 -13   -9.65    7.00
   1  -8 -13   28.63   16.65
   1  -8 -12   47.27   19.92
   1  -8 -12   55.84   23.95
  -1   8  11   28.07   15.72
   1  -8 -11   27.38   15.14
   1  -8 -11   45.22   22.07
  -1   8  10   -2.63   10.60
  -1   8  10   11.48    9.52
   1  -8 -10   16.97   12.18
   1  -8 -10   13.88   12.67
  -1   8   9   -0.44    4.15
  -1   8   9   10.41    8.70
   1  -8  -9    5.96    7.35
   1  -8  -9   -0.91    9.99
  -1   8   8   49.17   18.41
  -1   8   8   15.61    9.84
   1  -8  -8   23.72   13.11
   1  -8  -8   16.99   11.26
   1  -8  -7   -3.02    5.35
   1  -8  -7   15.36   12.05
  -1   8   6  130.28   32.75
   1  -8  -6  135.15   29.89
   1  -8  -6  153.22   40.67
  -1   8   5   18.40   10.25
  -1   8   5   38.09   16.25
   1  -8  -5   11.91    8.21
   1  -8  -5    7.12    9.83
  -1   8   4  105.02   29.05
  -1   8   4  150.55   35.46
   1  -8  -4   98.79   27.41
  -1   8   3  356.39   54.39
  -1   8   3  449.25   52.94
   1  -8  -3  373.77   19.23
   1  -8  -3  340.33   35.56
  -1   8   2    8.21    7.48
   1  -8  -2    5.85    3.92
  -1   8   2   -5.10    8.57
   1  -8  -2    5.69    3.58
   1  -8  -2   16.73    6.84
  -1   8   1   31.60   12.44
   1  -8  -1   35.31   11.94
  -1   8   1   28.63   10.06
   1  -8  -1   45.07   11.08
   1  -8  -1   25.56   10.06
  -1   8   0  439.27   21.74
   1  -8   0  443.80   19.38
  -1   8   0  432.67   19.41
   1  -8   0  445.17   46.96
  -1   8  -1   47.78   11.37
  -1   8  -1   45.12   11.28
   1  -8   1   47.43    9.99
   1  -8   1   58.47   14.57
  -1   8  -2   -3.17    6.93
  -1   8  -2    2.79    4.11
   1  -8   2   11.80    4.99
   1  -8   2    1.80    6.67
  -1   8  -3 1084.28   49.34
  -1   8  -3 1107.05   45.18
   1  -8   3 1085.85   42.97
   1  -8   3 1103.08   45.71
  -1   8  -4    9.40    6.73
   1  -8   4   11.28    6.57
  -1   8  -4   23.27   10.04
   1  -8   4    4.33    4.16
   1  -8   4   18.74    6.99
  -1   8  -5   -5.38    7.51
   1  -8   5   18.55    9.19
  -1   8  -5    5.01    4.66
  -1   8  -5   -8.80    7.69
   1  -8   5   -3.80    4.21
   1  -8   5    7.92    5.96
  -1   8  -6   57.92   15.02
   1  -8   6   47.01   11.98
  -1   8  -6   60.60   15.50
  -1   8  -6   49.36   12.65
   1  -8   6   44.97   10.75
   1  -8   6   58.96   14.77
   1  -8   7   13.95    6.70
  -1   8  -7   -4.67    7.35
  -1   8  -7    6.95    6.83
   1  -8   7    7.64    5.28
   1  -8   7    0.79    2.18
   1  -8   8   10.92    6.14
  -1   8  -8   12.50    8.40
   1  -8   8   12.08    6.65
   1  -8   9  158.45   36.81
  -1   8  -9  134.49   30.60
  -1   8  -9  149.99   32.94
   1  -8   9  146.17   28.66
   1  -8  10   21.62   10.48
  -1   8 -10    6.75    7.25
  -1   8 -10   24.90   11.78
   1  -8  10    8.34    6.67
   1  -8  11    5.06    6.26
  -1   8 -11   12.11   10.13
  -1   8 -11   -7.53    9.50
   1  -8  11    3.94    3.94
   1  -8  11    4.74    4.24
   1  -8  12  103.63   24.86
  -1   8 -12  123.82   30.43
  -1   8 -12  132.84   32.49
   1  -8  13  186.35   23.41
  -1   8 -13  263.45   26.89
  -1   8 -13  191.36   22.63
   1  -8  14   14.30   12.01
  -1   8 -14   17.44   12.31
  -1   8 -14   10.73    9.96
   1  -8  15  110.44   20.64
  -1   8 -15  124.39   23.75
  -1   8 -15  113.29   20.28
   1  -8  16   90.98   24.73
  -1   8 -16  108.84   30.74
  -1   8 -16  125.49   32.60
   1  -8  17    5.55    7.02
  -1   8 -17  -15.90    9.12
  -1   8 -17   10.02   11.00
  -1   8 -18   35.44   14.07
  -1   8 -18   71.37   28.95
  -1   8 -19   22.82   13.11
  -1   8 -19   17.12   14.89
  -1   8 -20    7.95    9.45
   1  -7 -15   14.37    5.22
   1  -7 -14   14.74   11.94
   1  -7 -14   -7.03    7.98
   1  -7 -13    9.43   10.61
   1  -7 -13   16.17   14.19
   1  -7 -12   41.40   21.71
   1  -7 -12   51.81   22.54
  -1   7  11   24.53   17.12
  -1   7  11   10.92    9.19
   1  -7 -11   12.38    9.92
   1  -7 -11   10.94    9.87
  -1   7  10   17.32   13.08
   1  -7 -10    1.41    3.27
   1  -7 -10    8.14    7.84
  -1   7   9  166.54   29.91
  -1   7   9  113.98   34.86
   1  -7  -9  149.40   10.54
   1  -7  -9  171.14   23.82
  -1   7   8   10.50    9.30
  -1   7   8   -0.13    4.34
   1  -7  -8   21.87   21.22
   1  -7  -8   -4.25    9.45
  -1   7   7   20.75   12.24
   1  -7  -7   -0.13    5.92
   1  -7  -7   10.75    8.20
  -1   7   6   35.18   13.76
   1  -7  -6   48.61   16.46
   1  -7  -6   59.05   20.53
  -1   7   5  108.24   24.91
   1  -7  -5   59.29   14.54
  -1   7   5   90.71   22.07
   1  -7  -5   89.63   25.71
   1  -7  -5   76.65   19.55
  -1   7   4   11.87    9.79
   1  -7  -4   10.63    8.04
  -1   7   4    4.01    3.79
  -1   7   4    9.51    6.50
   1  -7  -4   -3.23    4.85
   1  -7  -4   10.09    7.38
  -1   7   3   83.56   20.17
   1  -7  -3   25.59    9.72
  -1   7   3   35.23   12.51
  -1   7   3   65.69   16.43
   1  -7  -3   58.71   14.38
   1  -7  -3   53.83   16.17
  -1   7   2   38.11   12.90
   1  -7  -2   12.56    5.06
  -1   7   2   19.46    7.57
  -1   7   2   40.20   11.11
   1  -7  -2   30.83    8.15
   1  -7  -2   42.81   11.50
  -1   7   1   -8.79    9.94
   1  -7  -1    9.03    6.58
  -1   7   1   -5.34    5.06
  -1   7   1    5.18    5.37
  -1   7   0  273.62   34.58
   1  -7   0  274.12   27.28
  -1   7   0  230.92   28.75
  -1   7   0  294.62   12.98
   1  -7   0  242.49   30.61
   1  -7   0  331.82   34.94
  -1   7  -1   56.47   13.30
   1  -7   1   39.80    9.46
  -1   7  -1   39.77    9.37
  -1   7  -1   47.31   10.87
   1  -7   1   36.85    7.94
   1  -7   1   46.46    9.66
   1  -7   1   32.69    7.39
  -1   7  -2  169.61   26.01
  -1   7  -2  111.31   17.15
  -1   7  -2  125.70   20.76
   1  -7   2  115.83   13.05
   1  -7   2  143.42   17.21
   1  -7   2  126.90   18.70
  -1   7  -3  600.52   20.35
   1  -7   3  622.12   22.03
  -1   7  -3  607.37   20.28
  -1   7  -3  620.89   21.21
   1  -7   3  637.79   20.27
   1  -7   3  592.29   18.17
   1  -7   3  652.84   21.33
  -1   7  -4  115.37   16.11
   1  -7   4   94.38   16.63
  -1   7  -4   76.79   17.20
  -1   7  -4   93.31   12.05
   1  -7   4   95.07   12.47
  -1   7  -4  122.92   18.33
   1  -7   4   99.47    9.28
   1  -7   4   89.19   15.44
  -1   7  -5   65.71   15.18
   1  -7   5   56.34   14.70
  -1   7  -5   33.15    7.33
  -1   7  -5   69.57   17.59
   1  -7   5   38.43    9.41
  -1   7  -5   61.60   14.25
   1  -7   5   62.53   12.78
   1  -7   5   51.86   13.09
   1  -7   6   31.20    9.86
  -1   7  -6   10.70    7.85
  -1   7  -6   21.98    9.20
   1  -7   6   22.34    8.34
   1  -7   6   26.04    9.53
   1  -7   7  115.66   25.47
  -1   7  -7   54.78   13.63
  -1   7  -7   59.81   13.96
   1  -7   7   66.41   16.05
   1  -7   7   96.66   18.49
   1  -7   8   89.78   17.69
  -1   7  -8  126.82   23.28
  -1   7  -8   93.24   18.00
   1  -7   8  126.06   24.15
   1  -7   9  -13.47    9.26
  -1   7  -9   -6.77    7.00
  -1   7  -9   18.43   14.45
   1  -7   9    4.48    3.10
   1  -7  10   39.61   14.29
  -1   7 -10   33.87   12.39
  -1   7 -10   38.11   13.86
   1  -7  10   19.09    8.13
   1  -7  10   22.98   10.33
   1  -7  11   33.23   14.18
  -1   7 -11   34.31   14.90
  -1   7 -11   31.36   13.42
   1  -7  11   11.23    7.69
   1  -7  11   13.26    8.86
   1  -7  12   30.25   11.23
  -1   7 -12   35.70   13.78
  -1   7 -12   30.36   11.67
   1  -7  13  152.62   21.20
  -1   7 -13  165.22   18.12
  -1   7 -13  150.34   14.29
   1  -7  14   10.70    8.65
  -1   7 -14   37.80   13.79
  -1   7 -14   42.71   15.91
   1  -7  15   51.73   21.10
  -1   7 -15   45.71   19.36
  -1   7 -15   37.18   19.96
   1  -7  16   51.66   22.60
  -1   7 -16   33.12   20.07
  -1   7 -16   39.02   19.23
   1  -7  17   14.80   10.09
  -1   7 -17   11.63   10.54
  -1   7 -17   -1.92    5.32
  -1   7 -18   17.66   11.96
  -1   7 -18   31.45   21.99
  -1   7 -19   25.20   15.00
  -1   7 -19   13.24    7.75
  -1   7 -20   17.72   12.04
   1  -6 -16    1.59    4.73
   1  -6 -15   10.63    9.86
   1  -6 -14   25.39   13.15
   1  -6 -14   12.28   13.88
   1  -6 -13   -7.22    8.22
   1  -6 -13   -3.32    5.73
   1  -6 -12   35.80   16.41
   1  -6 -12   19.95   23.34
  -1   6  11   14.62   10.19
  -1   6  11    5.79    6.71
   1  -6 -11   -2.23    7.56
   1  -6 -11   15.46   10.74
  -1   6  10  -14.34   10.93
  -1   6  10    2.60    3.23
   1  -6 -10   17.29   11.04
   1  -6 -10   -4.26    8.93
  -1   6   9  108.73   29.13
  -1   6   9   71.40   27.30
   1  -6  -9  105.26   26.78
   1  -6  -9  103.48   29.41
  -1   6   8  148.55   36.04
  -1   6   8   46.00   19.19
  -1   6   8  127.85   29.00
   1  -6  -8  120.50   31.11
   1  -6  -8  114.20   34.59
  -1   6   7   92.28   22.54
  -1   6   7   48.66   18.47
   1  -6  -7   91.98   22.32
   1  -6  -7   97.90   24.74
  -1   6   6   27.54   11.98
   1  -6  -6   20.43    9.57
  -1   6   6   18.94    8.44
   1  -6  -6   30.42   11.30
   1  -6  -6   20.49    9.86
  -1   6   5  347.39   43.97
   1  -6  -5  336.78   33.31
  -1   6   5  291.68  103.17
   1  -6  -5  330.46   32.70
   1  -6  -5  288.26   99.13
  -1   6   4   30.18   11.71
   1  -6  -4   35.26    9.22
  -1   6   4   14.59    5.74
  -1   6   4   36.77    9.18
   1  -6  -4   30.26    8.26
   1  -6  -4   15.53    7.22
  -1   6   3  215.14   31.17
   1  -6  -3  208.08   27.52
  -1   6   3  165.30   21.80
  -1   6   3  222.94   35.10
   1  -6  -3  218.14   30.07
   1  -6  -3  220.70   22.92
  -1   6   2 1007.02   48.30
   1  -6  -2 1061.66   34.66
  -1   6   2 1031.04   30.80
  -1   6   2 1007.19   31.72
   1  -6  -2 1005.35   30.75
   1  -6  -2 1031.60   30.07
   1  -6  -2 1044.03   32.43
  -1   6   1  800.27   27.83
   1  -6  -1  851.92   26.27
  -1   6   1  806.62   25.16
  -1   6   1  778.10   28.37
   1  -6  -1  847.53   25.67
   1  -6  -1  774.28   25.15
  -1   6   0    5.35    6.33
   1  -6   0   11.36    4.69
  -1   6   0   19.44    7.70
  -1   6   0    2.79    5.20
   1  -6   0   22.25    9.88
   1  -6   0   26.33   10.86
  -1   6  -1  320.94   41.15
   1  -6   1  259.97   22.78
  -1   6  -1  244.42   25.76
  -1   6  -1  230.93   12.12
   1  -6   1  244.41   22.74
   1  -6   1  303.37   26.52
   1  -6   1  310.41   36.93
  -1   6  -2   12.34    5.45
   1  -6   2   -3.08    8.80
  -1   6  -2    3.48    2.74
  -1   6  -2   10.29    5.90
   1  -6   2   15.19    6.63
   1  -6   2   24.60    9.29
  -1   6  -3  210.49   32.72
   1  -6   3  165.43   22.56
  -1   6  -3  136.84   14.93
  -1   6  -3  176.35   20.42
   1  -6   3  145.45   14.43
   1  -6   3  167.15   20.07
   1  -6   3  194.98   23.81
  -1   6  -4   16.72    7.68
   1  -6   4   -0.74    8.53
  -1   6  -4    4.27    3.34
  -1   6  -4   12.15    5.70
   1  -6   4   10.59    5.59
  -1   6  -4   -6.91    6.91
   1  -6   4   -3.44    3.69
   1  -6   4   13.23    5.43
   1  -6   5 1622.69   47.59
  -1   6  -5 1640.33   47.23
  -1   6  -5 1640.04   48.37
   1  -6   5 1606.39   46.58
  -1   6  -5 1606.24   47.79
   1  -6   5 1674.27   47.85
   1  -6   5 1714.36 1029.84
   1  -6   6   54.92   13.39
  -1   6  -6   47.30   12.70
  -1   6  -6   66.48   16.20
   1  -6   6   48.89   10.88
  -1   6  -6   73.10   16.91
   1  -6   6   58.32   14.99
   1  -6   6   89.49   11.66
   1  -6   7  103.86   19.72
  -1   6  -7   69.59   16.80
  -1   6  -7   80.97   16.48
   1  -6   7   63.15   15.66
  -1   6  -7   86.78   17.44
   1  -6   7   63.54   13.06
   1  -6   7  115.84   20.83
   1  -6   8  788.14   33.80
  -1   6  -8  745.14   32.69
  -1   6  -8  778.60   32.81
  -1   6  -8  796.70   34.43
   1  -6   8  858.07   34.18
   1  -6   9   18.95    8.66
  -1   6  -9   28.35   10.57
  -1   6  -9   27.57   10.88
   1  -6   9   27.89    9.25
   1  -6   9   42.51   10.60
   1  -6  10    9.41    6.85
  -1   6 -10    4.68    4.03
  -1   6 -10   43.07   17.15
   1  -6  10   11.97    6.60
   1  -6  10   10.97    5.92
   1  -6  11  121.94   29.52
  -1   6 -11  119.17   28.32
  -1   6 -11  115.07   30.89
   1  -6  12  169.53   38.38
  -1   6 -12  158.69   38.78
  -1   6 -12  166.91   42.90
   1  -6  13   56.43   21.49
  -1   6 -13   94.65   24.60
  -1   6 -13   52.11   20.73
   1  -6  14    4.27    5.22
  -1   6 -14   -4.79    8.17
  -1   6 -14   21.05   12.84
   1  -6  15   34.57   18.31
  -1   6 -15   21.97   12.76
  -1   6 -15   26.78   16.30
   1  -6  16   15.02   12.37
  -1   6 -16   12.17   10.03
  -1   6 -16   19.37   13.50
  -1   6 -17   15.61   10.75
  -1   6 -17   19.92   11.33
  -1   6 -18  -12.92    8.07
  -1   6 -18   32.16   15.91
  -1   6 -19   -7.29    7.15
  -1   6 -19   -8.22   11.28
  -1   6 -20   15.37    7.18
   1  -5 -16   -8.68    9.08
   1  -5 -15    9.51    8.81
   1  -5 -14   -1.87    7.15
   1  -5 -14    8.67    9.22
   1  -5 -13   -1.77    7.82
   1  -5 -13    8.09    9.36
   1  -5 -12   20.33   11.23
   1  -5 -12   15.92   12.21
  -1   5  11   22.57   14.15
  -1   5  11    8.32    8.08
   1  -5 -11   13.66   10.11
   1  -5 -11    5.03    6.52
  -1   5  10   45.93   16.53
  -1   5  10   28.96   13.12
   1  -5 -10   12.57    9.62
   1  -5 -10   46.16   18.84
  -1   5   9    8.67    7.26
  -1   5   9    7.29    5.66
   1  -5  -9   15.16    8.24
   1  -5  -9   25.89   15.07
  -1   5   8   72.90   20.40
  -1   5   8   44.92   14.99
   1  -5  -8   57.85   19.65
   1  -5  -8   43.10   16.10
  -1   5   7  493.46   29.04
   1  -5  -7  498.29   44.17
   1  -5  -7  433.21   46.40
  -1   5   6  154.00   32.44
   1  -5  -6  116.81   22.96
   1  -5  -6  116.65   20.80
   1  -5  -6  102.03   23.71
  -1   5   5   14.15    8.75
   1  -5  -5   -0.73    6.04
   1  -5  -5  -10.43    5.71
   1  -5  -5   -1.67    3.46
  -1   5   4    7.73    7.79
   1  -5  -4   16.22    9.07
  -1   5   4   21.95    5.23
  -1   5   4   49.29   12.90
   1  -5  -4   25.06    7.25
   1  -5  -4   30.40    7.38
   1  -5  -4   20.06   13.71
  -1   5   3   13.48    8.50
   1  -5  -3    8.67    4.95
  -1   5   3   20.99   12.84
  -1   5   3   21.73    6.25
   1  -5  -3   18.83   10.54
   1  -5  -3   26.05    6.18
   1  -5  -3   16.04    8.21
  -1   5   2   20.89    9.86
   1  -5  -2   14.92    6.40
  -1   5   2    5.62    3.44
  -1   5   2    5.78    5.06
   1  -5  -2   12.56    5.42
   1  -5  -2   -2.83    4.95
   1  -5  -2   -0.03    7.88
  -1   5   1  773.44   25.06
   1  -5  -1  782.46   21.07
  -1   5   1  778.72   20.60
  -1   5   1  820.91   31.19
   1  -5  -1  813.72   22.08
   1  -5  -1  822.00   22.82
  -1   5   0 1436.71   27.94
   1  -5   0 1448.47   23.65
  -1   5   0 1461.69   24.26
  -1   5   0 1445.97   24.91
   1  -5   0 1487.38   24.38
   1  -5   0 1463.13   26.78
  -1   5  -1   83.83   12.35
   1  -5   1   75.83   10.58
   1  -5   1   88.48   13.71
  -1   5  -1   77.35    9.30
  -1   5  -1   66.93   25.51
   1  -5   1   69.16    8.62
   1  -5   1   88.77   11.88
   1  -5   1  110.69   17.42
   1  -5   2    8.25    3.38
  -1   5  -2   10.52    4.12
  -1   5  -2   -7.03    7.07
   1  -5   2   -1.24    5.65
   1  -5   2   -3.97    5.16
   1  -5   2   14.21    4.07
  -1   5  -3  645.30   27.97
   1  -5   3  740.88  264.61
  -1   5  -3  692.39   29.41
  -1   5  -3  659.57   35.29
   1  -5   3  689.41   28.41
  -1   5  -3  637.00   28.31
   1  -5   3  686.31   28.14
   1  -5   4   60.78   13.88
  -1   5  -4   66.94   11.85
  -1   5  -4   73.46   14.58
   1  -5   4   81.63   13.23
  -1   5  -4   96.50   17.84
   1  -5   4   86.67   14.12
   1  -5   5   61.26   11.79
  -1   5  -5   61.99   10.58
  -1   5  -5   61.66   11.68
   1  -5   5   48.82    8.64
  -1   5  -5   54.65   11.82
   1  -5   5   62.84    9.97
   1  -5   6  230.22   29.03
  -1   5  -6  210.46   21.34
  -1   5  -6  225.78   15.56
   1  -5   6  208.40   23.43
  -1   5  -6  188.91   24.81
   1  -5   6  230.05   22.30
   1  -5   7    3.68    4.00
  -1   5  -7   -1.91    4.47
  -1   5  -7    9.81    5.71
  -1   5  -7    4.98    3.23
   1  -5   7    7.45    4.14
   1  -5   8  319.40   41.78
  -1   5  -8  291.58   35.90
  -1   5  -8  321.53   31.32
  -1   5  -8  347.06  193.24
   1  -5   8  313.58   31.35
   1  -5   9    7.12    4.54
  -1   5  -9    9.95    5.76
  -1   5  -9   13.56    6.00
  -1   5  -9    7.45    5.72
   1  -5   9    2.50    1.89
   1  -5  10   58.63   14.68
  -1   5 -10   34.53   13.13
  -1   5 -10   67.00   17.21
  -1   5 -10   65.87   15.97
   1  -5  10   50.43   37.37
   1  -5  11  143.43   32.93
  -1   5 -11  115.72   27.68
  -1   5 -11  120.65   30.05
   1  -5  12   -4.02    7.34
  -1   5 -12   26.54   27.33
  -1   5 -12   12.90    9.83
   1  -5  13    8.24    6.86
  -1   5 -13   22.10   11.72
  -1   5 -13   17.31   11.77
   1  -5  14  157.77   16.72
  -1   5 -14  128.06   33.82
  -1   5 -14  142.71   11.90
   1  -5  15   18.33   12.41
  -1   5 -15   15.75   11.47
  -1   5 -15   20.93   16.53
   1  -5  16    8.83    7.57
  -1   5 -16  -11.00    8.67
  -1   5 -16   -1.44   10.97
  -1   5 -17    9.59    8.79
  -1   5 -17   -5.61   12.20
  -1   5 -18   12.32   10.72
  -1   5 -19    4.57    5.97
  -1   5 -19    8.33   11.21
  -1   5 -20   -4.80    6.18
   1  -4 -17   16.92   11.00
   1  -4 -16   50.93   23.25
   1  -4 -15   17.19   10.72
   1  -4 -14   44.38   21.85
   1  -4 -14   25.40   14.46
   1  -4 -13   30.54   17.35
   1  -4 -13   36.91   19.69
  -1   4  12   41.80   17.95
   1  -4 -12   59.77   20.11
   1  -4 -12   50.75   18.00
  -1   4  11   30.09   15.51
  -1   4  11    8.87    6.26
   1  -4 -11    8.08    7.46
   1  -4 -11   10.16   10.92
  -1   4  10   28.12   15.48
  -1   4  10   20.68   10.16
   1  -4 -10   33.11   12.58
   1  -4 -10   30.60   13.39
  -1   4   9    7.55    8.33
  -1   4   9    6.47    5.83
   1  -4  -9   10.62    7.82
   1  -4  -9   11.30    8.95
  -1   4   8  205.93   41.88
  -1   4   8  165.20   28.21
   1  -4  -8  191.92   33.47
   1  -4  -8  188.06   34.67
  -1   4   7   19.94    8.17
   1  -4  -7   -8.23    7.20
  -1   4   7    4.69    3.07
   1  -4  -7    3.34    3.87
   1  -4  -7  -11.32    7.03
  -1   4   6   -9.19   11.14
   1  -4  -6   -0.39    6.74
   1  -4  -6   10.46    7.00
   1  -4  -6   -0.70    5.11
  -1   4   5   38.16   10.88
   1  -4  -5   59.10   12.74
   1  -4  -5   38.74    9.17
   1  -4  -5   64.12   14.36
   1  -4  -5   50.34   13.20
  -1   4   4   31.28   18.45
   1  -4  -4   10.01    7.70
  -1   4   4   12.72    7.18
   1  -4  -4    8.65    4.93
   1  -4  -4    6.84    3.46
   1  -4  -4   19.72    8.25
  -1   4   3   27.02   12.67
   1  -4  -3   45.76    7.91
  -1   4   3   26.01    9.80
   1  -4  -3   32.61    6.20
   1  -4  -3   30.48   14.74
   1  -4  -3   27.16   12.58
  -1   4   2  500.34   23.40
   1  -4  -2  526.83   24.58
  -1   4   2  526.79   21.83
  -1   4   2  528.72   34.06
   1  -4  -2  519.47   22.61
   1  -4  -2  504.18   21.48
   1  -4  -2  533.85   23.85
  -1   4   1   66.84   25.81
   1  -4  -1   86.84   11.45
  -1   4   1   89.85   10.11
  -1   4   1   76.72   12.16
   1  -4  -1   74.76    9.43
   1  -4  -1   75.93   11.34
  -1   4   0 1799.91   30.02
   1  -4   0 1913.43   30.66
   1  -4   0 1921.61   29.99
  -1   4   0 1921.69   29.42
  -1   4  -1   98.87   14.63
   1  -4   1  101.99   13.81
   1  -4   1   81.99   11.97
  -1   4  -1   95.23   10.95
  -1   4  -1   79.94   13.69
   1  -4   1   95.85   12.11
   1  -4   1   94.66   12.77
  -1   4  -2  287.06   15.52
   1  -4   2  298.96   34.89
  -1   4  -2  264.17   12.35
  -1   4  -2  283.25   15.65
   1  -4   2  274.52   19.55
  -1   4  -2  243.55   12.52
   1  -4   2  323.34   27.72
   1  -4   3  799.64   21.55
  -1   4  -3  798.85   14.20
  -1   4  -3  800.95   14.34
   1  -4   3  791.28   13.97
  -1   4  -3  767.34  271.89
   1  -4   3  801.34   14.44
   1  -4   4  535.07   23.21
  -1   4  -4  528.18   42.67
  -1   4  -4  536.02   22.25
   1  -4   4  548.49   22.18
  -1   4  -4  509.93   34.89
   1  -4   4  543.76   22.38
   1  -4   5   26.07   10.46
  -1   4  -5   17.74    7.09
  -1   4  -5   33.66    6.38
   1  -4   5   16.41    6.86
  -1   4  -5   20.45   10.09
   1  -4   5   22.77    8.74
   1  -4   6  262.19   28.22
  -1   4  -6  218.80   22.08
  -1   4  -6  203.44   10.27
  -1   4  -6  213.15   31.32
   1  -4   6  225.56   21.64
   1  -4   7  259.72  156.22
  -1   4  -7  234.75   23.96
  -1   4  -7  237.35   18.06
  -1   4  -7  227.22   28.47
   1  -4   7  231.09   26.49
   1  -4   7  242.12   21.32
   1  -4   8   58.70   14.53
  -1   4  -8   42.54    9.35
  -1   4  -8   33.77    7.83
  -1   4  -8   65.82   14.36
   1  -4   8   35.84    8.63
   1  -4   9   67.07   18.87
  -1   4  -9   51.48   13.09
  -1   4  -9   50.61   12.99
  -1   4  -9   51.63   15.66
   1  -4   9   52.50   12.04
   1  -4  10  141.72   30.24
  -1   4 -10   76.58   18.87
  -1   4 -10  116.29   24.05
  -1   4 -10  142.19   36.02
   1  -4  10  112.06   20.53
   1  -4  11   50.27   16.96
  -1   4 -11   20.97    9.37
  -1   4 -11   47.63   17.17
  -1   4 -11   71.23   20.67
   1  -4  12   32.26   13.56
  -1   4 -12   40.25   17.13
  -1   4 -12   29.63   12.94
   1  -4  13   63.43   22.38
  -1   4 -13   49.13   17.73
  -1   4 -13   62.65   21.98
   1  -4  14   98.10   25.99
  -1   4 -14   72.82   25.89
  -1   4 -14   76.15   24.36
   1  -4  15   21.56   12.07
  -1   4 -15   11.82    8.27
  -1   4 -15    7.20    8.15
   1  -4  16   38.94   15.78
  -1   4 -16   36.08   18.97
  -1   4 -16   66.22   25.85
  -1   4 -17   32.52   26.50
  -1   4 -17   56.25   26.13
  -1   4 -18    8.67    9.97
  -1   4 -19   24.87   14.82
  -1   4 -19   19.79   12.53
  -1   4 -20    3.60    5.26
   1  -3 -17   14.45   14.58
   1  -3 -16  -14.63    9.75
   1  -3 -15   11.56   10.06
   1  -3 -14   19.62   13.87
   1  -3 -14   -7.35    6.79
   1  -3 -13   17.10   11.66
   1  -3 -13   27.98   14.69
  -1   3  12   19.98   11.56
   1  -3 -12   33.06   14.66
   1  -3 -12   13.29   11.23
  -1   3  11   19.27    9.69
   1  -3 -11   22.77   11.81
   1  -3 -11   25.59   14.43
  -1   3  10   21.64   11.25
  -1   3  10   34.70   14.10
   1  -3 -10   58.51   21.47
   1  -3 -10   27.38   11.84
  -1   3   9   78.24   21.66
  -1   3   9   63.69   15.90
   1  -3  -9   90.37   21.73
   1  -3  -9   62.68   16.87
  -1   3   8   17.26    9.40
  -1   3   8    8.91    5.40
   1  -3  -8   14.15    6.25
   1  -3  -8   10.87    7.50
  -1   3   7   60.64   15.06
   1  -3  -7   21.79    8.08
  -1   3   7   50.21   11.15
   1  -3  -7   43.80    9.83
   1  -3  -7   57.58   16.04
  -1   3   6  497.19   23.78
   1  -3  -6  551.60   29.61
  -1   3   6  526.00   15.74
   1  -3  -6  511.79   17.48
   1  -3  -6  542.17   18.01
   1  -3  -6  458.68   25.46
  -1   3   5  -11.73   11.37
   1  -3  -5   16.65    7.41
   1  -3  -5   12.55    5.66
   1  -3  -5   14.10    6.42
   1  -3  -5   -2.23    6.63
  -1   3   4  509.93   57.82
   1  -3  -4  419.00   15.88
   1  -3  -4  467.58   28.19
   1  -3  -4  450.77   13.61
   1  -3  -4  458.46   14.68
  -1   3   3  130.49   17.83
   1  -3  -3  104.84   15.94
  -1   3   3  147.62   24.25
   1  -3  -3  110.55   15.38
   1  -3  -3  147.90   21.57
   1  -3  -3   89.34   14.59
  -1   3   2   18.78    7.29
   1  -3  -2    8.42    6.38
  -1   3   2    7.33    2.37
   1  -3  -2    4.88    3.85
   1  -3  -2    4.74    3.44
   1  -3  -2   18.81    6.41
  -1   3   1   29.00    8.38
   1  -3  -1   30.44    6.25
  -1   3   1   30.88    6.45
  -1   3   1   37.60    7.71
   1  -3  -1   31.82    6.79
   1  -3  -1   35.53    7.63
  -1   3   0 1079.52   20.35
   1  -3   0 1129.10   18.51
   1  -3   0 1070.10   17.63
  -1   3   0 1057.38   19.08
  -1   3   0 1087.17   17.49
   1  -3   0 1099.89   18.61
  -1   3  -1 1558.85   24.01
   1  -3   1 1569.81   24.53
   1  -3   1 1565.37   24.52
  -1   3  -1 1528.25   23.80
  -1   3  -1 1611.36   24.26
   1  -3   1 1577.70   24.38
   1  -3   1 1505.35   26.11
   1  -3   3 1146.02   18.55
  -1   3  -3 1148.10   19.65
  -1   3  -3 1156.24   18.80
   1  -3   3 1152.08   18.54
  -1   3  -3 1175.62   19.46
   1  -3   3 1180.30   19.29
   1  -3   4  266.31   12.15
  -1   3  -4  267.50   15.85
  -1   3  -4  288.60   15.41
   1  -3   4  283.51   12.24
  -1   3  -4  290.09   13.89
   1  -3   4  311.29   14.30
   1  -3   5  197.21   25.62
  -1   3  -5  187.50   20.50
  -1   3  -5  230.16   85.26
  -1   3  -5  186.35   26.10
   1  -3   5  203.95   21.84
   1  -3   6  303.66   17.37
  -1   3  -6  301.57   13.05
  -1   3  -6  276.57   12.50
  -1   3  -6  285.58   39.28
   1  -3   6  307.43   13.35
   1  -3   6  315.82   20.28
   1  -3   7  226.56   27.44
  -1   3  -7  204.77   24.70
  -1   3  -7  194.58   16.18
  -1   3  -7  196.29   28.00
   1  -3   7  176.54   23.08
   1  -3   7  201.06   18.42
   1  -3   8   76.42   14.86
  -1   3  -8   70.30   16.08
  -1   3  -8  108.24   20.54
  -1   3  -8   84.85   15.94
   1  -3   8   83.26   14.49
   1  -3   9 1160.84   46.61
  -1   3  -9 1177.20   46.84
  -1   3  -9 1191.53   47.96
  -1   3  -9 1199.26   49.08
   1  -3   9 1224.54   47.79
   1  -3  10   -1.40    5.42
  -1   3 -10   17.08    9.73
  -1   3 -10   12.43    7.01
  -1   3 -10   19.17    9.40
   1  -3  10    6.01    2.21
   1  -3  11   -2.23    5.27
  -1   3 -11    1.42    2.14
  -1   3 -11   -3.19    7.04
  -1   3 -11  -13.50    9.02
   1  -3  11   -0.68    1.78
   1  -3  12   92.98   25.17
  -1   3 -12   35.95   15.48
  -1   3 -12   61.35   21.41
  -1   3 -12   83.99   24.67
   1  -3  13    5.86    5.51
  -1   3 -13   -5.87    6.39
  -1   3 -13   24.83   12.37
   1  -3  14   64.90   20.74
  -1   3 -14   55.66   19.55
  -1   3 -14   60.57   20.32
   1  -3  15    2.47    5.19
  -1   3 -15   -3.92    8.14
  -1   3 -15   17.99   10.54
  -1   3 -16   12.56    9.97
  -1   3 -16   24.16   17.33
  -1   3 -17   46.58   20.40
  -1   3 -17   70.72   22.40
  -1   3 -18   17.94   13.27
  -1   3 -18  -15.47   11.77
  -1   3 -19    6.57    8.46
  -1   3 -19   25.84   14.04
   1  -2 -18   46.07   20.70
   1  -2 -17   31.84   16.06
   1  -2 -16   22.57   15.42
   1  -2 -15   32.04   15.90
   1  -2 -14   22.95   12.57
   1  -2 -14    3.61    5.11
  -1   2  13    5.62    5.38
   1  -2 -13   -4.91    8.11
   1  -2 -13   15.83   10.00
  -1   2  12   32.93   14.94
   1  -2 -12   42.68   15.56
   1  -2 -12   42.24   16.27
  -1   2  11   76.47   22.12
   1  -2 -11   95.48   32.01
   1  -2 -11   98.00   29.57
  -1   2  10   19.67    8.68
   1  -2 -10   15.65   10.04
   1  -2 -10   11.15    7.53
  -1   2   9   67.79   23.35
  -1   2   9   56.22   13.18
   1  -2  -9   55.90   14.35
   1  -2  -9   59.98   15.79
  -1   2   8   42.50   13.35
   1  -2  -8   34.84   12.00
  -1   2   8   44.83   10.48
   1  -2  -8   37.70   13.99
   1  -2  -8   41.07   11.68
  -1   2   7   24.96    9.95
   1  -2  -7   19.78   10.20
  -1   2   7   23.19    8.42
   1  -2  -7   27.23   10.39
  -1   2   7   19.45    7.21
   1  -2  -7   19.74    8.42
  -1   2   6  128.44   21.90
   1  -2  -6  136.39   21.55
  -1   2   6  160.03   13.77
   1  -2  -6  151.74   19.99
   1  -2  -6  187.05   25.16
  -1   2   6  140.49   15.21
   1  -2  -6  151.13   18.45
  -1   2   5   20.37   11.13
   1  -2  -5   28.12   12.22
  -1   2   5   20.18    7.92
   1  -2  -5   20.53   10.11
   1  -2  -5   30.93   14.67
  -1   2   5   21.14    8.70
   1  -2  -5   19.44    7.87
  -1   2   4   39.78    9.50
   1  -2  -4   40.02    8.09
   1  -2  -4   48.65    9.51
   1  -2  -4   61.65   12.09
   1  -2  -4   45.56   10.40
  -1   2   3  259.83   15.10
   1  -2  -3  362.36   38.31
   1  -2  -3  324.27   18.18
   1  -2  -3  294.92   13.18
   1  -2  -3  291.83   12.96
  -1   2   2  187.18   34.69
   1  -2  -2  184.13   28.42
  -1   2   2  195.39   13.49
  -1   2   2  203.92   15.04
   1  -2  -2  234.14   26.87
  -1   2   1 3798.95   55.78
   1  -2  -1 3812.15   55.27
   1  -2  -1 3718.05   52.61
  -1   2   1 3835.98   54.05
  -1   2   1 3772.82   53.81
   1  -2  -1 3778.19   53.57
  -1   2   0 1200.82   20.80
   1  -2   0 1236.07   19.92
   1  -2   0 1188.52   19.31
  -1   2   0 1226.74   18.45
  -1   2   0 1216.52   19.54
   1  -2   0 1244.83   19.14
  -1   2  -1 1968.65   29.42
   1  -2   1 1927.44   28.21
   1  -2   1 1981.32   38.22
  -1   2  -1 1972.50   29.02
   1  -2   1 1993.65   28.59
   1  -2   1 1943.70   28.92
   1  -2   2   50.27   10.11
  -1   2  -2   46.27    8.79
  -1   2  -2   79.11   10.21
   1  -2   2   42.31    8.73
  -1   2  -2   60.60   13.21
   1  -2   2   58.71   11.39
   1  -2   3   29.32    6.19
  -1   2  -3   19.97    5.73
  -1   2  -3   28.47    6.53
   1  -2   3   18.04    4.19
  -1   2  -3   28.13    6.25
   1  -2   3   30.32    6.10
   1  -2   4  937.11   17.26
  -1   2  -4  970.40   15.33
  -1   2  -4  943.50   19.00
  -1   2  -4  911.60   16.73
   1  -2   4  963.97   16.74
   1  -2   4  914.36   20.74
   1  -2   5  415.74   20.15
  -1   2  -5  398.04   17.13
  -1   2  -5  438.78   21.60
  -1   2  -5  435.87   43.87
   1  -2   5  422.80   17.64
   1  -2   5  420.89   20.09
   1  -2   6  388.73   11.96
  -1   2  -6  353.23  159.26
  -1   2  -6  303.24   35.58
   1  -2   6  360.35   31.43
   1  -2   6  396.40   14.31
   1  -2   7  281.36   11.34
  -1   2  -7  290.54   10.19
  -1   2  -7  320.03   35.90
   1  -2   7  232.74   25.13
   1  -2   7  294.24   10.49
  -1   2  -8    4.59    4.30
   1  -2   8    8.15    5.42
  -1   2  -8    4.95    3.25
  -1   2  -8    1.63    4.63
   1  -2   8   -3.84    2.26
   1  -2   9   88.34   17.44
  -1   2  -9   88.00   17.47
  -1   2  -9  108.48   19.73
   1  -2   9   86.03   14.84
   1  -2  10  408.71   25.94
  -1   2 -10  321.28   24.86
  -1   2 -10  348.83   54.41
   1  -2  10  406.72   20.01
   1  -2  11   10.56    6.73
  -1   2 -11   12.05    6.96
  -1   2 -11   15.60   10.64
   1  -2  11    5.45    4.37
   1  -2  12   76.90   21.54
  -1   2 -12   36.57   16.19
  -1   2 -12   69.19   23.94
   1  -2  13   24.06   10.52
  -1   2 -13   15.17   11.83
   1  -2  14   33.59   15.28
  -1   2 -14   40.74   18.07
   1  -2  15    2.01    4.67
  -1   2 -15   18.79    9.98
  -1   2 -15  -14.28   10.65
  -1   2 -16    2.54    3.94
  -1   2 -16   17.50   13.17
  -1   2 -17   13.07   10.87
  -1   2 -17   45.71   21.00
  -1   2 -18   22.89   16.58
  -1   2 -18    1.68    9.19
  -1   2 -19   10.30   10.32
  -1   2 -19   13.05   11.90
   1  -1 -18   32.29   18.77
   1  -1 -17   24.18   14.04
   1  -1 -16   69.31   22.11
   1  -1 -15   78.15   29.36
   1  -1 -14   36.42   15.65
   1  -1 -14   21.10   15.15
  -1   1  13   65.71   23.50
   1  -1 -13  114.94   30.48
   1  -1 -13   94.83   24.16
  -1   1  12   78.02   28.34
   1  -1 -12  116.62   27.28
   1  -1 -12   55.49   21.17
  -1   1  11  232.69   21.02
   1  -1 -11  242.99   33.27
   1  -1 -11  195.60   46.10
  -1   1  10   24.82    8.98
   1  -1 -10   32.57   12.43
   1  -1 -10   33.21   12.75
  -1   1   9   66.18   15.40
   1  -1  -9   52.24   14.59
   1  -1  -9   68.25   18.41
  -1   1   8   38.41   10.08
   1  -1  -8   25.94   12.16
  -1   1   8   30.67    6.88
   1  -1  -8   32.86    8.92
   1  -1  -8   24.92   10.10
  -1   1   7    6.83    4.58
   1  -1  -7   12.46    8.04
  -1   1   7    1.39    1.15
   1  -1  -7   -5.69    7.45
   1  -1  -7   -4.30    4.21
  -1   1   6  181.21   28.24
   1  -1  -6  120.68   20.49
  -1   1   6  137.06    7.07
   1  -1  -6  176.67   16.86
  -1   1   6  136.19   15.44
   1  -1  -6  134.65   17.04
  -1   1   5   23.00    7.22
   1  -1  -5    8.27    6.40
  -1   1   5    7.33    2.08
   1  -1  -5   10.08    3.99
  -1   1   5   15.62    4.72
   1  -1  -5   13.99    5.06
  -1   1   4 1003.30   21.57
   1  -1  -4 1045.35   21.78
  -1   1   4 1038.62   14.99
  -1   1   4 1049.95   17.25
   1  -1  -4 1059.13   16.69
  -1   1   3  131.56   26.83
   1  -1  -3  139.87   22.38
   1  -1  -3  128.02   10.04
  -1   1   3  157.62   19.14
   1  -1  -3  130.23    9.72
  -1   1   2 2204.43   35.07
   1  -1  -2 2286.52   35.29
  -1   1   2 2344.35   33.92
   1  -1  -2 2294.63   33.47
   1  -1  -2 2322.24   34.28
  -1   1   1  794.26   22.36
   1  -1  -1  801.33   14.76
  -1   1   1  799.43   11.92
  -1   1   1  778.42   14.07
   1  -1  -1  829.71   13.10
  -1   1  -1   48.80   10.27
   1  -1   1   46.46    9.48
  -1   1  -1   50.40   12.68
   1  -1   2 2717.46   38.76
  -1   1  -2 2791.93   39.57
  -1   1  -2 2784.84   39.09
  -1   1  -2 2809.33   40.68
   1  -1   2 2808.56   39.87
   1  -1   3 1181.39   18.14
  -1   1  -3 1228.78   18.45
  -1   1  -3 1209.32   19.15
   1  -1   3 1210.04   19.79
   1  -1   4   38.17    7.60
  -1   1  -4   37.53    8.22
  -1   1  -4   36.09    7.28
   1  -1   4   35.93    8.18
  -1   1  -4   34.92    8.37
   1  -1   4   34.88    7.79
   1  -1   5   59.99   12.10
  -1   1  -5   67.74    9.09
  -1   1  -5   71.97   10.94
   1  -1   5   80.33    9.48
  -1   1  -5   84.22   15.51
   1  -1   5   83.10   13.34
  -1   1  -6  105.07   27.83
   1  -1   6  129.07   16.31
  -1   1  -6  124.13   12.14
  -1   1  -6  152.51   20.41
   1  -1   6  125.64   12.54
  -1   1  -6  118.95   22.36
   1  -1   6  119.13   15.42
  -1   1  -7  261.62  162.03
   1  -1   7  283.57   19.28
  -1   1  -7  301.46   11.03
  -1   1  -7  301.37   34.98
   1  -1   7  259.83  158.54
  -1   1  -7  294.30   20.09
   1  -1   7  288.87   11.42
  -1   1  -8  350.60  191.95
   1  -1   8  339.03   33.62
  -1   1  -8  324.28   28.39
  -1   1  -8  342.59  187.54
  -1   1  -8  331.70   38.90
   1  -1   8  348.79  190.69
  -1   1  -9   38.48   10.17
   1  -1   9   53.77   13.73
  -1   1  -9   36.25   13.48
  -1   1  -9   51.57   12.91
  -1   1  -9   55.55   14.71
   1  -1   9   47.59   12.48
   1  -1  10    4.82    2.46
  -1   1 -10    6.45    2.53
  -1   1 -10   10.31    7.26
   1  -1  10    5.37    2.64
   1  -1  11  113.48   26.06
  -1   1 -11   69.49   18.97
  -1   1 -11   99.11   24.48
  -1   1 -11   89.52   21.32
   1  -1  11   69.53   19.46
   1  -1  12   14.33    8.81
  -1   1 -12   20.84   11.01
  -1   1 -12   11.75    7.57
   1  -1  12    5.84    4.64
   1  -1  13   85.21   20.88
  -1   1 -13   80.35   19.92
   1  -1  14   57.96   18.06
  -1   1 -14   55.66   18.37
   1  -1  15    1.18    2.18
  -1   1 -15   40.65   20.09
  -1   1 -16  -17.66   11.08
  -1   1 -17   67.61   23.57
  -1   1 -17   72.14   26.09
  -1   1 -18   -7.07    7.36
  -1   1 -18   19.10   14.55
  -1   1 -19    9.69    9.39
   1   0 -18    8.57    9.17
   1   0 -17   -7.63    9.93
   1   0 -16   59.83   20.19
   1   0 -15   49.48   18.83
   1   0 -14    1.26    5.08
   1   0 -14    2.71    5.63
  -1   0  13   13.26    9.72
   1   0 -13   21.75   21.32
   1   0 -13   11.71    9.00
  -1   0  12   12.40    7.31
   1   0 -12   24.48   13.43
   1   0 -12   14.53    8.73
  -1   0  11   42.28   14.89
   1   0 -11   30.36   13.44
   1   0 -11   30.21   13.55
  -1   0  10  995.39   48.03
   1   0 -10  995.45   50.09
   1   0 -10 1004.13   50.07
  -1   0   9  132.86   24.39
   1   0  -9  120.06   21.52
   1   0  -9  112.35   20.90
   1   0  -8   19.27    7.83
  -1   0   8    5.65    3.61
   1   0  -8   17.17    7.68
   1   0  -8    0.85    2.21
  -1   0   7  464.02   20.07
   1   0  -7  388.59   47.51
  -1   0   7  391.03   13.39
   1   0  -7  378.45   41.72
  -1   0   7  411.71   23.29
   1   0  -7  424.64   13.58
  -1   0   6   91.93   23.74
   1   0  -6   82.50   15.25
  -1   0   6  113.87   16.97
   1   0  -6   94.75   17.49
  -1   0   6  120.31   19.77
   1   0  -6  114.74   19.93
  -1   0   5  150.29   24.01
   1   0  -5  119.47   16.55
  -1   0   5  127.02    9.54
   1   0  -5  126.29    8.93
  -1   0   5  147.65   17.41
   1   0  -5  151.32   16.50
  -1   0   4   33.59    8.32
   1   0  -4   41.08   12.22
  -1   0   4   24.28    4.40
   1   0  -4   31.50    5.41
   1   0  -4   30.79    6.81
  -1   0   4   30.67    7.19
   1   0  -4   27.99    6.53
  -1   0   3  530.36   23.44
   1   0  -3  510.85   23.24
   1   0  -3  532.02   22.47
  -1   0   3  499.22   20.73
  -1   0   2  192.83   30.62
   1   0  -2  202.38   29.98
   1   0  -2  156.26   11.59
   1   0   2  168.88   11.66
  -1   0  -2  156.09   10.64
  -1   0  -2  201.32   24.96
   1   0   2  178.64   12.34
  -1   0  -2  200.62   22.40
   1   0   2  172.63   12.36
   1   0   3  227.58   80.76
  -1   0  -3  229.84   81.86
  -1   0  -3  238.89   11.04
   1   0   3  233.13   10.40
  -1   0  -3  225.35   81.15
   1   0   3  243.95   11.10
  -1   0  -4  137.60   22.92
   1   0   4  104.27   15.89
  -1   0  -4  106.30   12.89
  -1   0  -4   88.77   13.45
   1   0   4  100.08   13.97
  -1   0  -4   71.21   13.73
   1   0   4  107.91   13.93
  -1   0  -5  599.96   25.36
   1   0   5  549.39   22.40
  -1   0  -5  616.57   27.98
  -1   0  -5  593.72   28.01
   1   0   5  592.83   25.58
  -1   0  -5  615.94   30.86
   1   0   5  632.24   30.47
  -1   0  -6   63.37   11.21
   1   0   6   69.35   11.39
  -1   0  -6   68.59   10.77
  -1   0  -6   84.42   17.36
   1   0   6   62.43   10.24
  -1   0  -6   45.17    9.16
   1   0   6   71.62   12.57
  -1   0  -7  297.55   41.29
   1   0   7  314.19   12.15
  -1   0  -7  332.48   14.35
  -1   0  -7  324.95   24.85
   1   0   7  264.35  160.60
  -1   0  -7  320.97   22.83
   1   0   7  323.12   11.55
  -1   0  -8  533.97   24.79
   1   0   8  591.53   24.62
  -1   0  -8  563.75   22.94
  -1   0  -8  623.54   27.19
  -1   0  -8  536.46   35.90
   1   0   8  582.85   23.75
  -1   0  -9   -0.01    7.54
   1   0   9   -4.03    4.22
  -1   0  -9    6.92    4.06
  -1   0  -9   13.14    7.07
  -1   0  -9    7.75    5.98
   1   0   9    7.48    5.30
  -1   0 -10  151.77   30.49
  -1   0 -10  111.02   28.19
   1   0  10  100.28   19.96
   1   0  11  187.17   42.72
  -1   0 -11  141.37   45.07
  -1   0 -11  166.41   41.09
   1   0  11   83.30   26.50
   1   0  12    6.79    5.81
  -1   0 -12   30.18   12.86
  -1   0 -12   15.88   11.69
   1   0  12    2.23    2.66
   1   0  13   81.11   20.65
  -1   0 -13   73.73   25.85
  -1   0 -13   54.42   18.43
   1   0  14   27.65   13.52
  -1   0 -14   50.40   18.64
  -1   0 -14   24.34   12.84
  -1   0 -15   43.09   18.44
  -1   0 -16   28.82   16.03
  -1   0 -17   -9.14   11.21
  -1   0 -18   22.83   12.50
  -1   0 -18   30.23   19.94
  -1   0 -19   -4.13    5.50
   1   1 -19   -0.40    6.91
   1   1 -19   40.83   18.08
   1   1 -18   10.82   10.45
   1   1 -17  -10.72   11.62
   1   1 -16   46.01   22.99
   1   1 -15   44.59   17.14
  -1  -1  14   12.94    8.74
   1   1 -14   23.09   13.34
  -1  -1  13   11.92    8.99
   1   1 -13   21.18   12.93
   1   1 -13    5.69    4.50
  -1  -1  12   68.65   23.57
   1   1 -12   62.24   21.70
   1   1 -12   31.98   13.96
  -1  -1  11   56.60   19.38
   1   1 -11   42.68   15.11
   1   1 -11   31.05   25.69
  -1  -1  10    5.92    2.66
   1   1 -10    9.33    5.31
   1   1 -10   -0.07    6.99
   1   1 -10   10.99    6.16
  -1  -1   9   53.11   11.22
   1   1  -9   38.25    8.24
   1   1  -9   47.06   11.50
   1   1  -9   48.21   11.65
   1   1  -8   65.58   16.73
  -1  -1   8   65.61   13.43
   1   1  -8   63.27   12.93
   1   1  -8   59.92   13.47
   1   1  -8   53.40   12.83
   1   1  -7 1766.70   46.67
  -1  -1   7 1761.37   42.00
   1   1  -7 1741.01   41.23
   1   1  -7 1760.05   45.07
  -1  -1   7 1762.95   43.13
   1   1  -7 1815.04   43.13
   1   1  -6  112.87   27.31
  -1  -1   6  134.39   14.23
   1   1  -6  122.06   55.32
   1   1  -6  125.20   18.36
  -1  -1   6  115.61   18.02
   1   1  -5   82.07   12.23
  -1  -1   5   94.78   11.50
   1   1  -5   79.73    9.11
   1   1  -5   84.63   12.32
  -1  -1   5  101.12   11.91
   1   1  -5   85.57    6.23
  -1  -1   4 3827.64   53.15
   1   1  -4 3806.77   52.86
   1   1  -4 3846.70   54.52
  -1  -1   4 3859.58   55.10
  -1  -1   3  106.61   19.69
   1   1  -3  119.20   15.49
   1   1  -3  119.38   12.88
   1   1  -3  132.34   17.59
  -1  -1   3  100.05    7.63
  -1  -1   2 2069.59   32.46
   1   1  -2 2018.50   31.97
   1   1  -2 2066.95   30.46
  -1  -1   2 2014.65   28.93
   1   1  -2 2093.04   31.10
  -1  -1   0   29.93    5.70
  -1  -1   0   18.74    5.18
   1   1   1   52.16   10.93
  -1  -1  -1   50.37    9.55
  -1  -1  -1   53.50    9.88
   1   1   1   46.97    9.36
  -1  -1  -1   77.58   11.56
   1   1   1   67.93    8.81
  -1  -1  -2   42.66    9.49
   1   1   2   55.39   10.42
  -1  -1  -2   47.63    9.69
  -1  -1  -2   56.73   10.63
   1   1   2   55.97   11.28
  -1  -1  -2   51.33   11.50
   1   1   2   63.26   12.09
  -1  -1  -3 1979.57   30.20
   1   1   3 1952.25   28.46
  -1  -1  -3 1941.85   29.13
  -1  -1  -3 1938.78   29.21
   1   1   3 2002.23   29.40
  -1  -1  -3 2020.06   30.92
   1   1   3 2007.63   30.54
  -1  -1  -4   94.48   14.55
   1   1   4  113.33   17.26
  -1  -1  -4   99.46   12.64
  -1  -1  -4   96.44   11.84
   1   1   4   73.62   11.08
  -1  -1  -4  100.10   16.44
   1   1   4   97.43   13.81
  -1  -1  -5   85.66   14.04
   1   1   5   88.96   16.58
  -1  -1  -5   79.54   15.03
   1   1   5   92.04   17.38
  -1  -1  -5  113.83   18.99
   1   1   5   83.75   19.02
  -1  -1  -6   41.88    8.31
   1   1   6   58.36   10.99
  -1  -1  -6   55.96    9.50
   1   1   6   46.84    7.91
  -1  -1  -6   45.23   11.01
   1   1   6   56.46    9.75
  -1  -1  -7   31.14    7.46
   1   1   7   61.53   13.31
  -1  -1  -7   58.60   13.66
   1   1   7   30.94    6.96
  -1  -1  -7   57.01   13.93
   1   1   7   49.98   10.51
  -1  -1  -8   51.94   12.36
   1   1   8   81.09   14.41
  -1  -1  -8   70.21   15.49
  -1  -1  -8   86.50   15.74
  -1  -1  -8   86.54   16.33
   1   1   8   84.29   15.20
  -1  -1  -9  -10.16    7.42
   1   1   9    3.12    3.11
  -1  -1  -9   11.60    8.85
  -1  -1  -9   12.61   10.89
   1   1   9    5.82    2.74
   1   1  10   44.65   15.21
  -1  -1 -10   52.41   17.62
  -1  -1 -10   23.26   10.95
   1   1  10   15.62    8.88
   1   1  11  173.56   40.77
  -1  -1 -11  159.17   36.87
  -1  -1 -11  113.51   37.49
   1   1  11   67.98   25.97
   1   1  12   89.31   21.80
  -1  -1 -12  112.57   29.69
  -1  -1 -12   87.49   29.99
   1   1  13  117.22   30.43
  -1  -1 -13  101.78   26.54
  -1  -1 -13   97.14   24.84
   1   1  14   18.92   10.32
  -1  -1 -14   37.94   15.05
  -1  -1 -14   17.95   10.19
  -1  -1 -15  -18.64   10.43
  -1  -1 -16   22.06   14.33
  -1  -1 -17   39.17   18.67
  -1  -1 -18   18.05   11.05
   1   2 -19   12.85    6.23
   1   2 -19   33.27   14.75
   1   2 -18   -1.30    5.47
   1   2 -18   -3.42   10.38
   1   2 -17   26.79   15.00
   1   2 -17   18.59    8.49
   1   2 -16   27.72   13.48
   1   2 -15   87.13   21.89
  -1  -2  14   31.85   14.51
   1   2 -14   64.89   21.31
  -1  -2  13    2.10    2.81
   1   2 -13   16.02   10.41
  -1  -2  12   14.97    7.52
   1   2 -12    5.31    4.60
   1   2 -12   -3.54    7.82
  -1  -2  11    7.61    3.12
   1   2 -11    8.69    3.27
   1   2 -11   27.57   11.11
  -1  -2  10    9.96    5.92
   1   2 -10   12.29    7.25
   1   2 -10    9.61    6.13
  -1  -2   9  206.89   18.42
   1   2  -9  222.07   20.52
   1   2  -9  217.07   33.04
   1   2  -8    5.72    6.83
  -1  -2   8    3.30    2.08
   1   2  -8    2.32    1.54
   1   2  -8    8.31    6.43
  -1  -2   8    3.42    3.27
   1   2  -7   55.10   10.88
  -1  -2   7   63.43   10.12
   1   2  -7   49.39    8.79
   1   2  -7   55.05   11.10
  -1  -2   7   61.34    9.23
   1   2  -6  636.94   20.94
  -1  -2   6  636.29   16.50
   1   2  -6  638.75   16.37
   1   2  -6  601.20   17.35
  -1  -2   6  659.47   17.55
   1   2  -5   55.09   12.37
  -1  -2   5   55.16   11.45
   1   2  -5   46.58    8.55
   1   2  -5   41.80   10.97
  -1  -2   5   50.41    9.28
  -1  -2   4 1138.12   17.16
   1   2  -4 1159.06   17.54
   1   2  -4 1123.80   24.19
  -1  -2   4 1127.73   18.19
   1   2  -4 1111.33   15.68
   1   2  -3  252.82   11.18
   1   2  -3  260.37   11.39
   1   2  -3  255.69   11.10
  -1  -2   3  261.53   11.16
  -1  -2   3  247.85   10.77
   1   2  -3  255.90   10.59
   1   2  -2 1944.29   28.28
  -1  -2   2 1958.51   28.09
   1   2  -2 1977.12   27.92
  -1  -2   2 1966.27   27.91
  -1  -2   2 1955.82   28.67
   1   2  -2 1968.95   28.35
   1   2  -1  297.87   12.84
  -1  -2   1  299.97   12.47
   1   2  -1  295.71   12.66
  -1  -2   1  294.15   13.47
   1   2  -1  314.13   13.38
   1   2   0 1772.10   24.90
   1   2   0 1781.34   26.15
  -1  -2   0 1798.68   26.30
  -1  -2   0 1808.17   26.54
   1   2   0 1805.70   25.14
  -1  -2   0 1818.46   28.16
   1   2   0 1862.79   27.48
  -1  -2  -1 2142.45   30.17
   1   2   1 2039.42   30.23
  -1  -2  -1 2105.58   30.56
  -1  -2  -1 2089.65   29.51
   1   2   1 2087.88   30.71
  -1  -2  -1 2056.29   34.00
   1   2   1 2153.22   31.81
   1   2   2  584.71   23.70
  -1  -2  -2  572.49   24.20
   1   2   2  554.43   22.48
  -1  -2  -2  573.65   26.57
  -1  -2  -2  597.34   23.82
   1   2   2  585.06   22.98
  -1  -2  -2  587.77   39.09
   1   2   2  586.78   24.53
   1   2   3  128.31   10.90
  -1  -2  -3  131.44   15.58
   1   2   3  118.42    9.81
  -1  -2  -3  122.12   16.19
  -1  -2  -3  135.42   17.51
   1   2   3  141.58   15.85
  -1  -2  -3  117.71   19.95
   1   2   3  138.86   18.84
   1   2   4    6.33    3.87
  -1  -2  -4   11.37    6.69
   1   2   4   -0.13    4.59
  -1  -2  -4    8.33    4.59
  -1  -2  -4    6.18    4.06
   1   2   4    9.94    4.78
   1   2   4    6.95    4.26
  -1  -2  -5  844.28   23.43
   1   2   5  797.35   23.43
  -1  -2  -5  810.82   21.29
  -1  -2  -5  809.04   23.20
   1   2   5  775.95   20.78
  -1  -2  -5  789.56   23.85
   1   2   5  810.59   21.06
  -1  -2  -6   74.86   18.12
   1   2   6   70.60   19.17
  -1  -2  -6   75.29   17.75
  -1  -2  -6   69.64   15.54
   1   2   6   45.74    9.90
  -1  -2  -6   51.65   13.77
   1   2   6   49.30   10.82
  -1  -2  -7   -2.64    7.30
   1   2   7    5.37    3.65
  -1  -2  -7    9.44    7.02
  -1  -2  -7   -4.54    6.64
   1   2   7    7.53    5.72
  -1  -2  -7   11.41    5.89
   1   2   7   -2.79    4.09
  -1  -2  -8  109.77   20.87
   1   2   8  141.72   21.09
  -1  -2  -8  130.71   30.70
  -1  -2  -8  109.52   26.51
   1   2   8  116.18   20.05
  -1  -2  -9   -8.08    6.72
   1   2   9    1.93    2.32
  -1  -2  -9   -5.79    6.73
  -1  -2  -9  -10.45   10.76
   1   2   9    6.59    3.79
   1   2  10  241.83   24.88
  -1  -2 -10  250.70   39.86
  -1  -2 -10  261.89   54.34
   1   2  11  127.27   28.67
  -1  -2 -11  104.77   23.49
  -1  -2 -11  139.55   31.55
   1   2  12   16.98   10.27
  -1  -2 -12   22.73   13.54
  -1  -2 -12   53.07   21.14
   1   2  13  180.03   35.76
  -1  -2 -13  211.18   31.43
  -1  -2 -13  187.92   43.58
   1   2  14    9.36    7.66
  -1  -2 -14   27.80   13.77
  -1  -2 -14    7.37    7.67
  -1  -2 -15   16.33   12.14
  -1  -2 -16   47.93   20.82
  -1  -2 -17   28.16   17.37
   1   3 -19  -12.13    7.88
   1   3 -19   18.02   15.26
   1   3 -18    6.77    6.86
   1   3 -18    5.70    8.72
   1   3 -17   13.48   10.46
   1   3 -17   14.64   13.42
   1   3 -16   25.05   16.95
   1   3 -16   19.54   13.99
   1   3 -15   12.40   10.86
   1   3 -15   13.10   12.93
  -1  -3  14   52.14   18.44
   1   3 -14   64.23   21.06
   1   3 -14   33.96   16.73
  -1  -3  13    4.19    6.45
   1   3 -13    2.95    3.21
   1   3 -13   13.25    9.06
  -1  -3  12   73.46   19.72
   1   3 -12   38.99   16.30
   1   3 -12   60.59   21.64
  -1  -3  11  182.14   32.57
   1   3 -11  140.68   26.63
   1   3 -11  139.44   32.35
  -1  -3  10   10.88    6.24
   1   3 -10    8.56    5.19
   1   3 -10   16.91    6.77
  -1  -3   9  761.23   30.49
   1   3  -9  771.03   30.63
   1   3  -9  781.51   32.76
   1   3  -8  115.42   21.02
  -1  -3   8  192.97   18.73
   1   3  -8  161.23   18.92
   1   3  -8  190.12   27.40
   1   3  -8  170.81   25.89
  -1  -3   8  144.95   18.98
   1   3  -7  120.68   24.93
  -1  -3   7  157.09   20.93
   1   3  -7  117.18   18.54
   1   3  -7  151.82   16.53
   1   3  -7  169.30   18.17
  -1  -3   7  146.72   12.44
  -1  -3   6  386.82   11.57
  -1  -3   5  426.67   18.55
   1   3  -5  442.18   18.56
   1   3  -5  426.80   20.52
   1   3  -5  432.23   27.74
  -1  -3   5  419.17   17.23
  -1  -3   5  418.76   16.84
   1   3  -4  413.48   23.63
   1   3  -4  375.60   18.51
  -1  -3   4  396.49   16.44
   1   3  -4  391.52   16.33
  -1  -3   4  394.10   16.17
  -1  -3   4  389.57   15.95
   1   3  -4  387.60   15.38
   1   3  -3   13.03    4.33
  -1  -3   3   12.14    4.39
   1   3  -3    5.33    2.37
  -1  -3   3    6.06    2.12
  -1  -3   3    2.64    3.71
   1   3  -3    8.57    2.34
   1   3  -2 1533.05   24.84
  -1  -3   2 1543.35   23.27
   1   3  -2 1590.53   22.40
  -1  -3   2 1582.93   22.33
  -1  -3   2 1582.46   24.49
   1   3  -2 1575.21   23.14
   1   3  -1   23.50    7.44
  -1  -3   1   17.80    5.38
  -1  -3   1   27.91    8.22
   1   3  -1   22.32    4.55
   1   3   0  122.72   10.17
   1   3   0  102.25   16.38
  -1  -3   0  124.82   16.20
  -1  -3   0  122.88    9.58
   1   3   0  107.99    7.65
  -1  -3   0  115.27   18.57
   1   3   0  127.61   19.38
   1   3   1   36.26    7.55
  -1  -3  -1   28.08    5.27
   1   3   1   25.56    6.12
  -1  -3  -1   27.15    5.49
  -1  -3  -1   21.74    4.59
   1   3   1   26.23    5.03
  -1  -3  -1   33.81    9.94
   1   3   1   29.57    6.85
   1   3   2  122.36   19.93
  -1  -3  -2  101.06    8.38
   1   3   2  118.78   15.02
  -1  -3  -2  112.83   13.44
  -1  -3  -2  126.92   12.78
   1   3   2  122.27   13.65
  -1  -3  -2  114.13   18.68
   1   3   2  105.66   12.57
   1   3   3  423.60   22.06
  -1  -3  -3  401.27   16.55
   1   3   3  347.43  155.55
  -1  -3  -3  396.49   15.74
  -1  -3  -3  399.14   12.41
   1   3   3  381.34   11.05
  -1  -3  -3  404.83   15.63
   1   3   3  400.57   12.43
   1   3   4  163.21   20.28
  -1  -3  -4  154.63   16.23
   1   3   4  160.13    7.94
  -1  -3  -4  151.28   22.94
  -1  -3  -4  171.34   25.22
   1   3   4  168.18   13.16
  -1  -3  -4  152.64   20.68
   1   3   4  142.48   15.98
   1   3   5  293.09   18.53
  -1  -3  -5  270.54  163.91
   1   3   5  298.46   20.54
  -1  -3  -5  254.69   31.74
  -1  -3  -5  283.98   27.38
   1   3   5  267.52  161.99
  -1  -3  -5  284.13   29.86
   1   3   5  235.54   23.88
   1   3   6   32.05    8.74
  -1  -3  -6   32.65    7.55
   1   3   6   34.17    8.37
  -1  -3  -6   16.47    5.98
  -1  -3  -6   37.97    8.66
   1   3   6   28.07   15.80
  -1  -3  -6   25.11   10.14
   1   3   6   25.48    9.46
  -1  -3  -7  325.22   40.57
   1   3   7  376.16   37.34
  -1  -3  -7  361.54   40.67
  -1  -3  -7  294.28  107.90
   1   3   7  250.07   35.17
  -1  -3  -8  209.50   36.22
   1   3   8  255.52   43.54
  -1  -3  -8  237.78   43.35
  -1  -3  -8  290.22   51.64
  -1  -3  -9   11.96    7.71
   1   3   9   21.58   10.63
  -1  -3  -9   31.94   11.93
  -1  -3  -9   29.29   14.99
   1   3  10    4.64    4.63
  -1  -3 -10   13.03    9.05
  -1  -3 -10   38.13   16.51
   1   3  11    2.89    2.95
  -1  -3 -11   34.08   15.89
  -1  -3 -11   16.23   10.03
   1   3  12   56.87   18.20
  -1  -3 -12   83.45   22.00
  -1  -3 -12   69.70   23.90
   1   3  13   10.96   10.92
  -1  -3 -13   33.13   18.00
  -1  -3 -13   39.77   15.89
  -1  -3 -14   -4.37    9.28
  -1  -3 -14   35.55   18.50
  -1  -3 -15   42.16   18.45
  -1  -3 -16    8.82    9.73
  -1  -3 -17   11.29   10.64
   1   4 -20   14.75    6.23
   1   4 -19   35.69   15.32
   1   4 -19   37.81   22.95
   1   4 -18  -11.78    8.58
   1   4 -18   55.23   25.04
   1   4 -17   19.07   13.82
   1   4 -17   52.53   18.27
   1   4 -16    7.22    8.16
   1   4 -16   29.81   13.62
  -1  -4  15    7.30    8.40
   1   4 -15   -2.09    8.82
   1   4 -15   -2.25    9.41
  -1  -4  14    1.30    4.07
   1   4 -14   -8.90    7.53
   1   4 -14   -7.31    7.56
  -1  -4  13    7.52    5.97
   1   4 -13    5.84    4.17
   1   4 -13   -0.37    7.95
   1   4 -13    6.49    5.02
  -1  -4  12   44.75   15.39
   1   4 -12   19.70    9.75
   1   4 -12   39.86   16.59
   1   4 -12   51.76   18.92
  -1  -4  11  225.19   38.89
   1   4 -11  188.45   31.47
   1   4 -11  211.47   40.54
   1   4 -11  184.67   37.04
  -1  -4  10  410.67   29.68
   1   4 -10  434.26   33.68
   1   4 -10  465.32   47.26
   1   4 -10  389.28   31.28
  -1  -4   9   27.73   15.74
   1   4  -9   28.04   15.89
   1   4  -9   27.18    9.96
   1   4  -9   43.51    9.90
  -1  -4   8  466.78   22.15
   1   4  -8  402.15   15.78
   1   4  -8  454.65   16.09
   1   4  -8  407.19   20.44
  -1  -4   8  386.06   30.53
  -1  -4   7  595.20   19.52
   1   4  -7  638.23   19.61
   1   4  -7  597.65   25.14
   1   4  -7  610.35   20.16
  -1  -4   7  614.68   27.52
  -1  -4   6  235.63   11.10
   1   4  -6  246.16   19.50
   1   4  -6  246.69   13.35
   1   4  -6  236.59   26.35
  -1  -4   6  273.61   23.41
  -1  -4   6  252.52   14.61
   1   4  -5  527.23   15.05
  -1  -4   5  535.66   15.76
   1   4  -5  522.60   14.28
  -1  -4   5  534.67   17.58
  -1  -4   5  523.12   13.99
   1   4  -5  534.47   15.26
   1   4  -4  917.14   17.86
   1   4  -4  911.89   24.11
  -1  -4   4  945.06   17.26
   1   4  -4  925.68   14.67
  -1  -4   4  919.44   14.48
  -1  -4   4  903.93   15.68
   1   4  -4  919.60   14.40
   1   4  -3  492.98   21.65
   1   4  -3  471.06   20.09
  -1  -4   3  488.96   20.10
   1   4  -3  504.65   20.34
  -1  -4   3  475.23   18.80
  -1  -4   3  502.92   21.67
   1   4  -3  492.57   20.10
   1   4  -2  512.61   23.53
  -1  -4   2  537.60   32.91
   1   4  -2  506.87   19.86
  -1  -4   2  519.24   20.62
  -1  -4   2  489.63   20.70
   1   4  -2  538.13   22.20
   1   4  -1  151.62   13.35
   1   4  -1  128.27   20.46
  -1  -4   1  166.39   17.55
  -1  -4   1  151.83   26.70
   1   4  -1  144.75   17.66
   1   4   0   -2.02    4.22
   1   4   0    5.17    2.67
  -1  -4   0    4.76    3.06
  -1  -4   0    1.49    0.84
  -1  -4   0   11.99    4.92
   1   4   0    2.09    2.25
   1   4   1   38.50    8.23
  -1  -4  -1   30.39    6.40
   1   4   1   24.01    5.95
  -1  -4  -1   23.02    4.52
  -1  -4  -1   28.45    6.56
   1   4   1   25.03    4.75
  -1  -4  -1   36.26    8.50
   1   4   1   34.98    7.14
   1   4   2   33.61    7.08
  -1  -4  -2   42.45    8.13
   1   4   2   68.77   12.53
  -1  -4  -2   44.93    7.29
  -1  -4  -2   49.01    7.50
   1   4   2   43.59    6.97
  -1  -4  -2   55.39   10.16
   1   4   2   38.82    7.90
   1   4   3  265.83   15.43
  -1  -4  -3  243.77   13.99
   1   4   3  240.26   33.49
  -1  -4  -3  219.44   23.46
  -1  -4  -3  242.07   10.71
   1   4   3  262.78   22.64
  -1  -4  -3  235.23   28.17
   1   4   3  222.04   23.58
   1   4   4    5.59    4.05
  -1  -4  -4   10.78    5.69
   1   4   4    0.12    8.27
  -1  -4  -4   15.37    8.10
  -1  -4  -4    2.54    2.71
   1   4   4    2.67    2.34
  -1  -4  -4   13.29    9.80
   1   4   4    5.07    4.48
   1   4   5   56.34   14.35
  -1  -4  -5   51.67   12.15
   1   4   5   58.72   13.77
  -1  -4  -5   45.28    9.93
  -1  -4  -5   62.03   14.37
   1   4   5   50.34   11.57
  -1  -4  -5   53.03   17.09
   1   4   5   39.77    8.70
   1   4   6    3.68    3.52
  -1  -4  -6    5.70    4.03
   1   4   6   10.33    6.25
  -1  -4  -6   13.60    5.02
   1   4   6    7.40    4.76
  -1  -4  -6   14.51    6.50
   1   4   7   46.51   18.34
  -1  -4  -7   51.73   13.05
   1   4   7   67.51   16.82
  -1  -4  -7   38.56   14.56
  -1  -4  -7   50.44   37.81
  -1  -4  -8   25.59   11.56
   1   4   8    3.29    2.95
  -1  -4  -8   12.97    7.69
  -1  -4  -8   29.32   13.88
  -1  -4  -9   57.54   20.55
   1   4   9   82.54   22.42
  -1  -4  -9   80.34   23.52
  -1  -4  -9  113.80   34.02
   1   4  10   61.19   22.03
  -1  -4 -10   34.87   12.72
  -1  -4 -10   20.69   12.00
   1   4  11   97.56   25.15
  -1  -4 -11   81.15   21.55
  -1  -4 -11   74.55   25.08
   1   4  12    5.83    6.93
  -1  -4 -12   -6.32    7.64
  -1  -4 -12   15.56   11.22
   1   4  13   12.54    9.41
  -1  -4 -13   17.14   11.91
  -1  -4 -13    0.79    5.67
  -1  -4 -14   27.28   15.87
  -1  -4 -14   17.80    9.06
  -1  -4 -15    7.93   11.12
  -1  -4 -16   38.47   18.14
  -1  -4 -17   -3.66    8.08
   1   5 -20    6.91    8.55
   1   5 -19   44.96   39.40
   1   5 -19   54.12   25.12
   1   5 -18   13.98   11.92
   1   5 -18   22.94   15.00
   1   5 -17   12.79   10.66
   1   5 -17   23.09   15.74
   1   5 -16   58.27   23.83
   1   5 -16   43.55   18.75
  -1  -5  15   -0.74    3.24
   1   5 -15  -14.75    8.94
   1   5 -15    5.61    7.15
  -1  -5  14    9.27    6.88
   1   5 -14   -1.06    7.51
   1   5 -14   29.68   13.66
  -1  -5  13  101.94   25.41
   1   5 -13   73.59   26.13
   1   5 -13  145.67   35.16
   1   5 -13  112.36   29.09
  -1  -5  12   70.89   70.58
   1   5 -12   28.14   12.16
   1   5 -12   80.34   22.17
   1   5 -12   63.70   22.43
  -1  -5  11   10.98    7.08
   1   5 -11    7.02    5.61
   1   5 -11    9.01    7.53
   1   5 -11    4.98    4.47
  -1  -5  10   13.33    7.95
   1   5 -10    4.61    3.50
   1   5 -10   16.25    9.46
   1   5 -10    2.86    2.70
  -1  -5   9   75.62   19.18
   1   5  -9   56.61   14.78
   1   5  -9   76.64   18.91
   1   5  -9   76.88   26.41
  -1  -5   8   23.27    9.51
   1   5  -8    6.70    4.58
   1   5  -8   13.02    6.03
   1   5  -8   -0.43    3.22
  -1  -5   8   -2.42    3.30
   1   5  -7    2.52    2.51
   1   5  -7   20.03   12.89
   1   5  -7    4.28    4.40
  -1  -5   7    9.44    4.94
  -1  -5   7    5.29    2.93
   1   5  -6  123.53   13.46
   1   5  -6  138.12   17.60
  -1  -5   6  116.86   20.97
   1   5  -6  134.86   19.37
  -1  -5   6  118.87   17.69
  -1  -5   6  142.89    9.97
   1   5  -5  151.78   15.40
   1   5  -5  171.80   20.37
  -1  -5   5  136.25   14.14
   1   5  -5  137.91   11.63
  -1  -5   5  159.17   12.91
  -1  -5   5  184.38   17.20
   1   5  -5  158.98   14.28
   1   5  -4  252.34   27.58
   1   5  -4  240.04   12.32
  -1  -5   4  262.21   28.86
   1   5  -4  249.54   10.75
  -1  -5   4  261.78   11.03
  -1  -5   4  275.50   12.99
   1   5  -4  266.04   22.66
   1   5  -3  215.17   30.02
   1   5  -3  241.10   12.93
  -1  -5   3  233.75   23.74
   1   5  -3  223.78    9.54
  -1  -5   3  228.36    9.39
  -1  -5   3  235.54   35.41
   1   5  -3  249.29   22.23
   1   5  -2  198.93   33.56
  -1  -5   2  211.19   24.41
  -1  -5   2  237.65    9.52
  -1  -5   2  234.36   28.14
   1   5  -2  209.77   29.73
   1   5  -1 1435.22   35.09
   1   5  -1 1440.02   36.84
  -1  -5   1 1483.75   36.92
  -1  -5   1 1470.14   37.05
   1   5  -1 1421.15   35.02
   1   5   0   14.70    5.94
   1   5   0   10.42    5.64
  -1  -5   0   11.40    5.74
  -1  -5   0   10.37    3.89
  -1  -5   0   20.45    9.79
   1   5   0    9.61    5.03
   1   5   1   40.21    7.89
  -1  -5  -1   58.27    9.14
   1   5   1   67.61   14.27
  -1  -5  -1   53.99    8.50
  -1  -5  -1   69.81   10.72
  -1  -5  -1   61.84   11.61
   1   5   2  267.93   24.93
  -1  -5  -2  243.88   21.67
  -1  -5  -2  226.23   15.10
  -1  -5  -2  246.87   18.43
  -1  -5  -2  207.91   30.47
   1   5   2  184.71   18.11
   1   5   3   14.62    7.61
  -1  -5  -3    8.17    4.68
   1   5   3   -6.92    6.51
  -1  -5  -3    5.36    3.75
  -1  -5  -3    6.14    3.01
   1   5   3    7.72    3.86
  -1  -5  -3    1.65    3.34
   1   5   3    1.53    3.23
   1   5   4    5.29    8.17
  -1  -5  -4   15.37    5.69
   1   5   4   23.38    8.64
  -1  -5  -4    0.86    3.63
  -1  -5  -4   14.59    5.40
   1   5   4    6.24    4.32
  -1  -5  -4   -1.00    9.47
   1   5   5    8.33    5.44
  -1  -5  -5    5.30    3.66
   1   5   5   11.63    6.88
  -1  -5  -5   23.29    8.58
   1   5   6  319.99   36.98
  -1  -5  -6  327.33   33.87
   1   5   6  311.11   25.41
  -1  -5  -6  280.79   47.75
  -1  -5  -6  313.57   43.63
   1   5   7   55.16   19.40
  -1  -5  -7   30.66   14.03
   1   5   7   32.67   11.33
  -1  -5  -7   48.10   16.23
  -1  -5  -7   58.47   21.64
  -1  -5  -8   -7.62    5.06
   1   5   8   15.58    7.92
  -1  -5  -8    9.77    6.96
  -1  -5  -8    3.06    7.03
   1   5   9  180.25   20.78
  -1  -5  -9  206.48   35.37
  -1  -5  -9  144.33   33.54
   1   5  10   12.42    8.91
  -1  -5 -10   -8.48    7.50
  -1  -5 -10   29.27   15.70
   1   5  11   68.07   19.52
  -1  -5 -11   77.46   19.67
  -1  -5 -11   35.07   14.49
   1   5  12  162.32   31.06
  -1  -5 -12  180.03   33.02
  -1  -5 -12  114.39   24.66
  -1  -5 -13    5.54    8.52
  -1  -5 -13   18.03   14.18
  -1  -5 -14   38.28   37.39
  -1  -5 -14   -0.92    8.65
  -1  -5 -15   55.69   25.15
  -1  -5 -16   18.96   11.16
   1   6 -20   26.39   13.60
   1   6 -19   33.18   14.39
   1   6 -19   20.64   14.93
   1   6 -18   24.12   17.29
   1   6 -18   29.67   14.44
   1   6 -17   19.47   13.60
   1   6 -17    6.49    7.85
   1   6 -16   68.16   27.81
   1   6 -16   21.19   14.35
   1   6 -15    7.98    9.62
   1   6 -15   12.67   10.62
  -1  -6  14   13.70    9.82
   1   6 -14   -8.72    7.85
   1   6 -14   -2.18    8.26
  -1  -6  13  216.09   30.95
   1   6 -13  209.89   28.00
   1   6 -13  205.83   24.94
  -1  -6  12   12.43    8.99
   1   6 -12   11.20    7.87
   1   6 -12    4.14    5.79
   1   6 -12   -8.07    8.21
  -1  -6  11   21.10    9.97
   1   6 -11   11.64    7.38
   1   6 -11   10.79    6.88
  -1  -6  10  430.37   27.58
   1   6 -10  426.38   23.17
   1   6 -10  386.31   41.86
  -1  -6   9   19.42    8.06
   1   6  -9   10.69    6.05
   1   6  -9   27.83    9.56
   1   6  -9   14.06    5.08
   1   6  -8    7.19    5.48
   1   6  -8   24.96   10.23
   1   6  -8   -4.53    5.91
  -1  -6   8    4.92    3.61
  -1  -6   8    7.25    5.06
   1   6  -7    8.06    5.40
   1   6  -7    4.58    3.55
   1   6  -7   15.50    6.73
  -1  -6   7    4.38    3.02
  -1  -6   7   13.12    5.18
   1   6  -6   -7.48    5.62
   1   6  -6    6.49    5.15
  -1  -6   6   -1.15    4.65
   1   6  -6   -4.57    4.37
  -1  -6   6    3.40    2.35
  -1  -6   6   -1.11    2.75
   1   6  -5  250.86   37.29
   1   6  -5  279.56   16.99
  -1  -6   5  232.09   31.22
   1   6  -5  272.12  163.60
  -1  -6   5  271.11  162.98
  -1  -6   5  247.25   19.01
   1   6  -4   18.76    7.95
   1   6  -4   17.32    8.62
  -1  -6   4    7.61    4.75
   1   6  -4   10.33    4.53
  -1  -6   4    9.70    3.67
  -1  -6   4    7.83    5.00
   1   6  -4   12.54    5.79
   1   6  -3   23.66    9.94
   1   6  -3    8.42    5.16
  -1  -6   3    6.68    3.74
   1   6  -3   14.55    5.75
  -1  -6   3   15.11    5.63
  -1  -6   3   14.93    7.01
   1   6  -3    9.12    4.44
   1   6  -2   -3.17    4.59
   1   6  -2   11.48    5.81
   1   6  -2   -3.26    5.47
  -1  -6   2    8.18    4.26
  -1  -6   2   10.93    6.49
   1   6  -2   10.68    5.29
   1   6  -1    9.84    4.68
   1   6  -1   16.30    8.01
  -1  -6   1   17.50    7.39
  -1  -6   1   -0.14    7.47
   1   6  -1   19.72    7.82
   1   6   0    4.62    3.02
   1   6   0   13.70    7.11
  -1  -6   0    1.77    2.34
  -1  -6   0    1.76    0.90
  -1  -6   0   -6.34    8.92
   1   6   0    7.13    6.60
   1   6   1   -0.02    4.99
  -1  -6  -1    4.66    2.56
   1   6   1   -5.87    6.58
  -1  -6  -1   10.58    5.68
  -1  -6  -1    0.66    2.01
  -1  -6  -1   -4.77    9.80
   1   6   1    8.62    5.13
   1   6   2  220.33   31.80
  -1  -6  -2  218.06   16.25
   1   6   2  214.10   29.62
  -1  -6  -2  184.58   25.11
  -1  -6  -2  219.97   15.67
  -1  -6  -2  183.28   26.36
   1   6   3  337.11   31.32
  -1  -6  -3  349.83  191.39
   1   6   3  355.53  194.54
  -1  -6  -3  321.22   28.30
  -1  -6  -3  327.00   28.36
  -1  -6  -3  309.98   43.56
   1   6   4  527.35   37.31
  -1  -6  -4  457.31   31.09
   1   6   4  499.39   35.49
  -1  -6  -4  499.49   33.08
  -1  -6  -4  479.41   59.24
   1   6   5   97.14   24.56
  -1  -6  -5   82.38   20.19
   1   6   5   68.78   17.47
  -1  -6  -5   93.59   22.91
  -1  -6  -5   95.98   21.57
   1   6   6  243.90   38.38
  -1  -6  -6  226.07   21.89
   1   6   6  235.02   22.35
  -1  -6  -6  215.53   53.06
  -1  -6  -6  236.02   29.41
   1   6   7  678.89   50.79
  -1  -6  -7  531.97   50.37
   1   6   7  656.69   41.93
  -1  -6  -7  649.89   42.41
  -1  -6  -7  623.58   51.02
   1   6   8   24.67   12.64
  -1  -6  -8    0.03    2.95
   1   6   8   -0.18    5.70
  -1  -6  -8    1.29    3.71
  -1  -6  -8    6.46    7.22
   1   6   9   13.40   10.09
  -1  -6  -9    7.67    6.22
  -1  -6  -9   38.08   15.21
   1   6  10    8.78    7.98
  -1  -6 -10    6.61    8.01
  -1  -6 -10  -16.60    9.96
   1   6  11   19.57   13.16
  -1  -6 -11   30.70   16.41
  -1  -6 -11   33.05   18.13
   1   6  12   44.93   24.18
  -1  -6 -12   47.58   23.56
  -1  -6 -12   54.94   18.91
  -1  -6 -13    7.68    9.03
  -1  -6 -13   42.38   18.59
  -1  -6 -14    5.36    7.25
  -1  -6 -14   11.00    9.13
  -1  -6 -15   18.13   10.50
  -1  -6 -16    8.46    8.05
   1   7 -20   20.44   10.45
   1   7 -20    7.03    9.56
   1   7 -19   21.66   13.36
   1   7 -19    1.81    7.20
   1   7 -18   15.26   14.05
   1   7 -18   15.62   14.02
   1   7 -17   18.53    9.31
   1   7 -17   30.74   17.00
   1   7 -16   16.75   11.21
   1   7 -16   -1.60    8.88
   1   7 -15   -0.28    5.90
   1   7 -15    2.38    4.81
   1   7 -14   10.32    9.41
   1   7 -14   19.01   11.63
   1   7 -13   36.30   13.93
   1   7 -13   34.61   14.41
   1   7 -12    0.73    3.79
   1   7 -12    7.41    6.68
   1   7 -11  200.58   47.08
   1   7 -11  193.33   44.01
   1   7 -10  378.55   41.24
   1   7 -10  298.05  221.40
   1   7  -9  209.02   38.59
   1   7  -9  211.41   36.50
  -1  -7   9  175.81   26.03
   1   7  -8  258.17   39.35
   1   7  -8  255.90   35.95
  -1  -7   8  209.79   32.38
  -1  -7   8  255.87   28.38
   1   7  -7   34.47   11.02
   1   7  -7   66.55   14.96
   1   7  -7   70.28   15.67
  -1  -7   7   47.44   12.74
  -1  -7   7   66.37   15.56
   1   7  -6   66.09   16.53
   1   7  -6  105.65   22.99
   1   7  -6   95.95   19.74
  -1  -7   6   85.78   15.54
  -1  -7   6   96.35   16.51
   1   7  -5  119.05   18.88
   1   7  -5  160.65   23.10
   1   7  -5  173.82   22.86
  -1  -7   5  156.85   14.63
  -1  -7   5  179.09   19.97
   1   7  -4    6.06    4.92
   1   7  -4   18.48    9.59
  -1  -7   4   18.15    8.77
   1   7  -4    2.77    1.95
  -1  -7   4    7.18    3.38
  -1  -7   4    7.36    4.17
   1   7  -4    5.23    3.61
   1   7  -3   24.60    6.04
   1   7  -3   19.73   11.63
   1   7  -3   27.91    7.48
  -1  -7   3   30.02   10.53
  -1  -7   3   24.76    5.74
  -1  -7   3   28.22    8.07
   1   7  -3   23.41    5.30
   1   7  -2   94.05   14.25
   1   7  -2   45.13   12.63
   1   7  -2   76.15   16.93
  -1  -7   2   51.69   10.92
  -1  -7   2   81.16   49.61
   1   7  -2   50.16   11.47
   1   7  -1   24.21    6.60
   1   7  -1   30.21    7.95
  -1  -7   1   17.61    8.29
  -1  -7   1   26.21    6.67
   1   7  -1   28.34    6.87
   1   7   0   -3.99    5.11
   1   7   0   -0.40    6.28
  -1  -7   0    6.25    4.23
  -1  -7   0    1.58    1.11
  -1  -7   0   -0.01    9.29
   1   7   1  458.98   23.51
   1   7   1  460.74   20.96
  -1  -7  -1  470.03   18.63
  -1  -7  -1  442.71   48.35
   1   7   2  146.54   22.90
  -1  -7  -2  120.20   22.73
   1   7   2  136.44   26.32
  -1  -7  -2  136.67   23.40
  -1  -7  -2  110.10   21.72
   1   7   3   63.74   15.93
  -1  -7  -3   57.06   13.74
   1   7   3   61.26   15.21
  -1  -7  -3   59.70   15.60
  -1  -7  -3   53.92   14.78
   1   7   4  368.45   41.04
  -1  -7  -4  299.40  220.30
   1   7   4  320.28   37.92
  -1  -7  -4  314.02   16.26
  -1  -7  -4  307.19   39.49
   1   7   5   40.42   15.82
  -1  -7  -5   32.01   12.16
   1   7   5   60.82   22.83
  -1  -7  -5   43.55   14.48
  -1  -7  -5   34.48   13.17
   1   7   6   70.33   26.62
  -1  -7  -6   53.21   19.54
  -1  -7  -6   74.25   20.07
  -1  -7  -6   60.93   22.05
   1   7   7  395.60   44.93
  -1  -7  -7  319.56   32.22
   1   7   7  346.32   41.92
  -1  -7  -7  400.14   32.21
  -1  -7  -7  381.21   68.26
   1   7   8   19.27   12.42
   1   7   8    9.15    6.82
  -1  -7  -8   29.21   12.80
  -1  -7  -8   31.67   15.79
   1   7   9   10.19    8.36
  -1  -7  -9   21.09   13.97
  -1  -7  -9   36.82   15.88
   1   7  10  104.71   24.68
  -1  -7 -10  116.40   22.28
  -1  -7 -10   94.58   19.33
   1   7  11    6.76    6.66
  -1  -7 -11   -3.50    6.39
  -1  -7 -11    7.67   11.74
  -1  -7 -12   14.99   10.59
  -1  -7 -12   26.42   23.98
  -1  -7 -13    2.70    6.29
  -1  -7 -13  -18.83   11.20
  -1  -7 -14   -0.10    6.73
  -1  -7 -14   -8.71    9.19
  -1  -7 -15    5.23    9.38
   1   8 -20    3.44   10.03
   1   8 -19   22.55   13.43
   1   8 -19   20.73   15.13
   1   8 -18   23.33   16.72
   1   8 -18   46.20   18.69
   1   8 -17   12.10   10.90
   1   8 -17   37.52   23.82
   1   8 -16   16.41   11.49
   1   8 -16   27.59   12.73
   1   8 -15    8.08    9.78
   1   8 -15  -24.64   10.53
   1   8 -14   21.69   15.56
   1   8 -14   27.10   14.67
   1   8 -13  121.06   32.96
   1   8 -13  142.22   14.67
   1   8 -12   30.67   11.39
   1   8 -12   29.38   11.31
   1   8 -11   34.94   15.77
   1   8 -11   23.69   13.77
   1   8 -10  105.71   27.51
   1   8 -10   83.57   21.00
  -1  -8  10   73.23   16.60
   1   8  -9   51.30   13.72
   1   8  -9   80.63   21.11
  -1  -8   9   67.63   16.91
   1   8  -8  202.50   39.64
   1   8  -8  240.36   40.05
  -1  -8   8  144.19   33.14
  -1  -8   8  182.78   31.88
   1   8  -7  323.98   23.99
   1   8  -7  332.80   42.10
  -1  -8   7  333.31   22.25
  -1  -8   7  393.78   34.74
   1   8  -6   -6.99    7.16
   1   8  -6   11.03    6.89
  -1  -8   6   -4.56    2.81
  -1  -8   6   -8.52    6.57
   1   8  -5  422.41   19.52
   1   8  -5  422.97   17.95
  -1  -8   5  425.57   17.16
  -1  -8   5  492.84   42.17
   1   8  -4   18.06    7.93
   1   8  -4   15.72    6.97
  -1  -8   4   -0.10    1.76
  -1  -8   4   16.70    8.29
   1   8  -3  270.60   37.69
   1   8  -3  225.56   34.46
  -1  -8   3  224.59   31.92
   1   8  -3  152.96   85.99
   1   8  -2 1324.45   53.00
   1   8  -2 1397.13  763.95
  -1  -8   2 1407.16  769.25
   1   8  -1   81.69   15.87
   1   8  -1   89.45   18.75
  -1  -8   1   87.90   16.80
   1   8   0   17.52    6.79
   1   8   0   38.90   10.28
  -1  -8   0    2.34    6.33
   1   8   1   75.87   20.13
   1   8   1   60.12   14.91
  -1  -8  -1   57.98   13.73
  -1  -8  -1   50.42   13.90
   1   8   2   37.47   14.81
  -1  -8  -2   24.43    9.78
   1   8   2   42.17   16.06
  -1  -8  -2   36.98   13.51
  -1  -8  -2   40.92   16.66
   1   8   3   -6.75    7.37
  -1  -8  -3    4.03    2.70
   1   8   3   18.19   13.96
  -1  -8  -3    5.21    2.35
  -1  -8  -3    7.77    8.81
   1   8   4   37.38   15.26
  -1  -8  -4   26.88   12.17
   1   8   4   50.71   18.12
  -1  -8  -4   25.50   11.05
  -1  -8  -4   24.29   15.69
   1   8   5   58.24   21.14
  -1  -8  -5   13.11    9.15
   1   8   5   26.27   26.58
  -1  -8  -5   15.98    8.64
  -1  -8  -5   39.55   18.59
   1   8   6    6.48    7.08
  -1  -8  -6    6.76    4.94
  -1  -8  -6    9.83    7.42
  -1  -8  -6   25.41   14.74
   1   8   7   18.59   11.52
   1   8   7   20.99   13.25
  -1  -8  -7   26.16   11.80
  -1  -8  -7  -10.09   11.10
   1   8   8   19.82   13.68
   1   8   8   38.91   15.88
  -1  -8  -8   17.32   12.12
  -1  -8  -8   28.91   15.87
   1   8   9    2.08    3.25
  -1  -8  -9   -0.81    5.98
  -1  -8  -9   -7.48   13.04
   1   8  10   25.25   17.17
  -1  -8 -10   21.11   14.51
  -1  -8 -10   36.55   21.29
  -1  -8 -11   12.21   10.41
  -1  -8 -11   -4.53   12.16
  -1  -8 -12    4.99    6.32
  -1  -8 -12   21.14   15.00
  -1  -8 -13   62.05   26.93
  -1  -8 -13   50.22   24.55
   1   9 -20   10.84   11.93
   1   9 -19   15.91   18.37
   1   9 -19   32.92   17.97
   1   9 -18   28.57   25.47
   1   9 -18   25.67   15.05
   1   9 -17  137.73   42.87
   1   9 -17   83.99   30.02
   1   9 -16   11.87   12.09
   1   9 -16   23.24   19.62
   1   9 -15   23.46   16.10
   1   9 -15   22.59   16.65
   1   9 -14  160.78   27.85
   1   9 -14  141.49   29.58
   1   9 -13   15.49   11.37
   1   9 -13   31.35   15.62
   1   9 -12   -8.66    8.34
   1   9 -12   13.25   11.15
   1   9 -11   60.69   23.45
   1   9 -11   42.51   15.41
  -1  -9  11   10.29    8.25
   1   9 -10  100.19   33.15
   1   9 -10  124.20   29.78
  -1  -9  10  106.19   31.70
   1   9  -9   29.18   14.68
   1   9  -9   56.32   19.04
  -1  -9   9   23.87   10.54
  -1  -9   9   23.82   11.20
   1   9  -8   -0.61    9.09
   1   9  -8   13.92    8.54
  -1  -9   8   15.40    8.96
  -1  -9   8    6.96    7.68
   1   9  -7   18.91    8.56
   1   9  -7    6.55    3.89
  -1  -9   7   10.27    6.14
  -1  -9   7   15.49    9.16
   1   9  -6    1.91    4.47
   1   9  -6   11.11    6.75
  -1  -9   6    5.79    2.65
  -1  -9   6   24.57   10.18
   1   9  -5  109.75   25.34
   1   9  -5  108.73   24.83
  -1  -9   5  115.90   18.38
  -1  -9   5  135.70   24.02
   1   9  -4   -7.44    5.71
   1   9  -4   -3.98    7.98
  -1  -9   4    0.85    1.51
  -1  -9   4   19.67    9.57
   1   9  -3  386.08   29.66
   1   9  -3  411.42   30.47
  -1  -9   3  397.87   63.59
   1   9  -2   25.46    9.95
   1   9  -2   35.91   13.61
  -1  -9   2   28.06   10.73
   1   9  -1  114.76   25.21
   1   9  -1   82.05   22.96
  -1  -9   1  105.25   23.65
   1   9   0   95.37   20.85
   1   9   0   88.43   21.63
  -1  -9   0  114.50   24.50
   1   9   1  356.02   20.30
   1   9   1  423.63   45.50
  -1  -9  -1  369.55   14.50
  -1  -9  -1  400.04   45.68
   1   9   2   18.42    9.36
   1   9   2   22.32   11.84
  -1  -9  -2    4.30    3.35
  -1  -9  -2   13.39    9.85
   1   9   3   97.47   27.86
  -1  -9  -3   78.16   23.78
   1   9   3  125.23   30.07
  -1  -9  -3   99.93   29.63
  -1  -9  -3  105.15   31.30
   1   9   4   57.34   21.96
  -1  -9  -4   28.02   15.00
   1   9   4   44.92   18.06
  -1  -9  -4   42.24   17.15
  -1  -9  -4   34.97   15.83
   1   9   5  118.39   30.48
   1   9   5  157.56   19.92
  -1  -9  -5   84.79   20.69
  -1  -9  -5  119.27   33.21
   1   9   6    9.99    8.50
  -1  -9  -6    5.94    6.41
  -1  -9  -6   25.89   15.16
   1   9   7   10.51    8.85
   1   9   7   19.52   13.01
  -1  -9  -7   12.19   10.36
  -1  -9  -7   -0.04   11.17
   1   9   8    4.32    5.73
   1   9   8   10.16   10.09
  -1  -9  -8   16.76    9.13
  -1  -9  -8   -1.72   11.95
   1   9   9   19.30   13.56
  -1  -9  -9   16.33   11.48
  -1  -9  -9    0.54    8.65
   1   9  10   -3.21    5.25
  -1  -9 -10   17.94   10.48
  -1  -9 -10    6.35    9.86
  -1  -9 -11   51.58   18.78
  -1  -9 -12   29.64   17.55
  -1  -9 -13   19.97   11.41
   1  10 -19  -15.04    9.29
   1  10 -19    8.88   12.08
   1  10 -18   -7.08    9.82
   1  10 -18   12.76   11.75
   1  10 -17   14.46   12.59
   1  10 -17   25.15   14.87
   1  10 -16    9.08   11.61
   1  10 -16   19.48    9.60
   1  10 -15   11.73   11.07
   1  10 -15   38.01   16.71
   1  10 -14   19.68   11.90
   1  10 -14   17.89   10.52
   1  10 -13    5.10    7.10
   1  10 -13    0.85    6.66
   1  10 -12   24.48   14.03
   1  10 -12   13.31   10.33
   1  10 -11   17.29   11.44
   1  10 -11   23.32   11.24
  -1 -10  11    9.60    6.89
   1  10 -10  169.41   21.58
   1  10 -10  162.14   18.76
  -1 -10  10  146.41   37.76
   1  10  -9   71.01   70.95
   1  10  -9   59.61   20.70
  -1 -10   9   29.78   12.64
  -1 -10   9   53.55   19.58
   1  10  -8   16.95   10.04
   1  10  -8   19.79    9.85
  -1 -10   8   10.01    6.59
  -1 -10   8   25.20   13.10
   1  10  -7  255.80   35.14
   1  10  -7  241.33   17.68
  -1 -10   7  243.15   13.97
  -1 -10   7  278.14   28.61
   1  10  -6   48.17   17.93
   1  10  -6   15.62    9.63
  -1 -10   6   22.06   10.14
  -1 -10   6   30.12   14.43
   1  10  -5  357.75   37.38
   1  10  -5  343.10   38.96
  -1 -10   5  284.26   11.37
  -1 -10   5  306.15   37.61
   1  10  -4  100.80   24.49
   1  10  -4   94.33   25.54
  -1 -10   4   51.51   17.90
   1  10  -3   35.01   12.36
   1  10  -3   32.38   12.81
  -1 -10   3   37.83   13.32
   1  10  -2   14.15    8.54
   1  10  -2   24.16   11.32
  -1 -10   2    5.76    6.29
   1  10  -1  135.86   37.42
   1  10  -1  163.25   38.99
  -1 -10   1  114.86   29.20
   1  10   0   14.46    8.76
   1  10   0   33.12   13.14
  -1 -10   0    9.23   13.53
   1  10   1   22.98   11.78
   1  10   1   33.12   15.90
  -1 -10  -1   20.29   11.12
   1  10   2   72.62   25.66
   1  10   2   48.55   19.93
  -1 -10  -2   50.63   17.89
  -1 -10  -2   69.91   25.86
   1  10   3   48.60   18.99
   1  10   3   35.25   13.47
  -1 -10  -3   32.55   14.21
  -1 -10  -3   47.11   17.29
   1  10   4   44.18   16.96
   1  10   4   57.71   22.21
  -1 -10  -4   28.79   13.17
  -1 -10  -4   26.05   12.56
   1  10   5   39.61   14.04
   1  10   5   18.62   12.31
  -1 -10  -5   10.83    7.63
  -1 -10  -5   29.30   13.49
   1  10   6   82.31   22.47
  -1 -10  -6   79.90   21.68
  -1 -10  -6   75.53   25.48
   1  10   7   11.62   10.87
  -1 -10  -7   -0.67    3.50
  -1 -10  -7    1.03    6.78
   1  10   8    3.45    4.81
  -1 -10  -8   -2.58    4.11
  -1 -10  -8   18.80   13.44
   1  10   9   12.50   10.43
  -1 -10  -9   41.56   21.71
   1  10  10    8.43    8.26
  -1 -10 -10   16.55   15.40
  -1 -10 -11   30.71   18.39
  -1 -10 -12   20.88   12.43
   1  11 -19   22.84   13.21
   1  11 -18  -10.52    9.30
   1  11 -18   13.37    3.92
   1  11 -17   29.30   13.81
   1  11 -17   23.90   12.59
   1  11 -16   20.31   10.25
   1  11 -16   26.19   17.21
   1  11 -15   -6.97    9.61
   1  11 -15   14.71   10.66
   1  11 -14   34.82   16.50
   1  11 -14   22.62   15.93
   1  11 -13   13.25    9.86
   1  11 -13    7.54    7.86
   1  11 -12   33.10   30.61
   1  11 -12   45.21   15.09
   1  11 -11   -4.77    6.27
   1  11 -11   11.65    8.72
  -1 -11  11    7.50    7.53
   1  11 -10   49.04   47.44
   1  11 -10   35.81   14.22
  -1 -11  10   35.16   13.63
   1  11  -9  209.62   32.02
   1  11  -9  198.52   29.95
  -1 -11   9  166.37   27.05
   1  11  -8   58.91   22.44
   1  11  -8   50.90   18.32
   1  11  -8   30.34   12.10
  -1 -11   8   17.69   10.88
  -1 -11   8   44.23   16.31
   1  11  -7   72.36   20.60
   1  11  -7   44.16   15.93
  -1 -11   7   27.63   12.59
  -1 -11   7   40.01   16.72
   1  11  -6  761.60   65.92
   1  11  -6  817.50   52.88
  -1 -11   6  703.00   43.68
  -1 -11   6  841.87   54.98
   1  11  -5   29.01   12.11
   1  11  -5   14.45   14.85
  -1 -11   5   32.95   15.80
   1  11  -4   82.67   22.81
   1  11  -4   71.14   71.88
  -1 -11   4   80.84   23.15
   1  11  -3  148.98   40.67
   1  11  -3  152.82   36.78
  -1 -11   3  187.83   44.66
   1  11  -2  153.55   38.26
   1  11  -2  150.51   37.91
  -1 -11   2  167.41   44.23
   1  11  -1  219.88   32.42
   1  11  -1  224.42   31.13
  -1 -11   1  250.98   33.59
   1  11   0    6.73    6.53
   1  11   0   14.94    9.93
  -1 -11   0  -12.16   11.40
   1  11   1   -2.40    8.66
   1  11   1   18.46   12.04
  -1 -11  -1    1.12    4.38
   1  11   2   73.51   20.03
   1  11   2   93.60   23.50
  -1 -11  -2   82.73   29.03
   1  11   3  426.82   30.08
   1  11   3  437.80   40.50
  -1 -11  -3  278.18   50.93
   1  11   4   20.13   13.78
   1  11   4   15.25   11.46
  -1 -11  -4   39.66   19.93
   1  11   5    6.89    8.18
   1  11   5   -2.61   10.52
  -1 -11  -5   29.62   17.32
  -1 -11  -6   30.18   17.24
   1  11   7    2.34    5.05
  -1 -11  -7   -2.40   14.41
   1  11   8    9.40    9.14
  -1 -11  -8    7.26    8.22
   1  11   9   13.63   11.03
  -1 -11  -9   92.70   33.89
  -1 -11 -10   -2.31   13.17
  -1 -11 -11   26.10   13.54
   1  12 -19   -9.01    7.95
   1  12 -18   33.24   17.59
   1  12 -18   23.55   17.63
   1  12 -17    0.98    5.43
   1  12 -17   -1.48    8.82
   1  12 -16   21.32   14.04
   1  12 -16    5.74    7.26
   1  12 -15   -2.74    9.47
   1  12 -15   -0.38    8.77
   1  12 -14   40.81   20.91
   1  12 -14   13.58   12.26
   1  12 -13   29.55   13.67
   1  12 -13   -1.88    8.82
   1  12 -12   -6.32   10.19
   1  12 -12   10.41   13.28
   1  12 -11  172.14   30.46
   1  12 -11  119.04   32.29
  -1 -12  11   79.80   27.57
   1  12 -10   -3.69    8.80
   1  12 -10   13.25    9.73
   1  12 -10   10.76    7.63
  -1 -12  10   -0.23    6.89
   1  12  -9    4.70    5.97
   1  12  -9   -3.69    7.80
   1  12  -9    3.51    4.64
  -1 -12   9   15.58   10.09
   1  12  -8   34.18   12.95
   1  12  -8   17.34   11.00
  -1 -12   8   34.34   13.96
   1  12  -7   76.67   19.34
   1  12  -7   43.76   16.22
  -1 -12   7   45.45   17.16
   1  12  -6   16.23   10.53
   1  12  -6    5.73    6.06
  -1 -12   6   11.45    8.97
   1  12  -5   73.30   19.85
   1  12  -5   64.53   24.38
  -1 -12   5  109.06   27.32
   1  12  -4   54.88   21.87
   1  12  -4   39.50   15.19
  -1 -12   4   30.38   13.65
   1  12  -3    9.02    7.89
   1  12  -3  -13.11    8.72
  -1 -12   3   21.16   14.39
   1  12  -2   14.31   11.36
   1  12  -2   44.59   16.26
  -1 -12   2   63.12   25.26
   1  12  -1    6.67    7.48
   1  12  -1   28.58   13.53
  -1 -12   1   17.14   11.62
   1  12   0    6.19    7.21
   1  12   0   20.09   12.08
  -1 -12   0   41.38   15.33
   1  12   1   15.07   10.96
   1  12   1   -3.32    9.00
  -1 -12  -1   -4.07   12.38
   1  12   2   20.14   15.44
   1  12   2   48.59   16.92
  -1 -12  -2   26.64   14.20
   1  12   3   15.83   10.38
   1  12   3    8.30    9.32
  -1 -12  -3   20.02   19.36
   1  12   4   19.01   13.05
  -1 -12  -4   -5.42   13.95
   1  12   5   -1.55   10.25
  -1 -12  -5    9.60    8.90
  -1 -12  -6    3.06    5.87
   1  12   7   -8.90    5.79
  -1 -12  -7   37.02   20.37
   1  12   8   -6.99    5.44
  -1 -12  -8   38.51   18.33
  -1 -12  -9   13.54    8.46
  -1 -12 -10   13.53   10.94
   1  13 -17   24.60   14.00
   1  13 -17   12.33    3.41
   1  13 -16    7.61    9.27
   1  13 -16    5.89    7.39
   1  13 -15   -5.10    8.80
   1  13 -15   10.48    9.98
   1  13 -14    9.33   11.34
   1  13 -14    3.47    4.66
   1  13 -13   13.58   11.22
   1  13 -13  -15.08    6.62
   1  13 -12    9.22    8.37
   1  13 -12   32.67   15.10
   1  13 -12    9.62    8.17
   1  13 -11  177.02   30.10
   1  13 -11  189.53   35.49
   1  13 -11  107.74   23.87
  -1 -13  11   92.07   31.57
   1  13 -10   38.58   15.66
   1  13 -10   39.30   15.78
   1  13 -10   24.42   13.61
  -1 -13  10   -4.48    7.26
   1  13  -9   31.92   16.06
   1  13  -9   21.51   16.23
  -1 -13   9    1.52    5.86
   1  13  -8   -3.69    8.09
   1  13  -8   21.29   15.35
  -1 -13   8   20.69   14.97
   1  13  -7   18.31   11.75
   1  13  -7   16.04   11.06
  -1 -13   7   -3.61    8.56
   1  13  -6   25.62   28.76
   1  13  -6    5.95    8.33
  -1 -13   6   29.24   14.82
   1  13  -5   19.12   11.83
   1  13  -5  -13.09    8.38
  -1 -13   5    3.56    4.85
   1  13  -4   32.69   16.02
   1  13  -4   29.45   13.33
  -1 -13   4   41.88   17.21
   1  13  -3   13.25    9.98
   1  13  -3    7.54    8.54
  -1 -13   3   40.04   15.56
   1  13  -2   89.99   22.83
   1  13  -2   84.87   21.41
  -1 -13   2   56.47   18.94
   1  13  -1   13.29   14.10
   1  13  -1   34.44   14.56
  -1 -13   1   67.51   62.35
   1  13   0   13.26   12.49
   1  13   0   15.53   11.30
  -1 -13   0   12.93    9.25
   1  13   1  148.66   29.07
   1  13   1  101.07   17.72
  -1 -13  -1   65.50   23.19
   1  13   2   53.95   20.78
  -1 -13  -2   36.89   17.06
   1  13   3   14.36   11.61
  -1 -13  -3   21.36   23.85
   1  13   4  245.26   69.14
  -1 -13  -4  174.74   51.09
   1  13   5   17.13   11.78
  -1 -13  -5   51.68   24.29
  -1 -13  -6  -25.81   13.92
   1  13   7    4.97    7.67
  -1 -13  -7   55.02   26.93
   1  13   8    7.49    9.31
  -1 -13  -8   52.80   24.65
   1  14 -16   20.58   13.02
   1  14 -16  -16.67    9.52
   1  14 -15  -13.51    9.22
   1  14 -15   11.73    9.85
   1  14 -14   23.16   15.00
   1  14 -13    6.42    8.81
   1  14 -13   22.83   14.33
   1  14 -12   74.31   21.58
   1  14 -12   73.13   21.22
   1  14 -11  -17.70   10.16
   1  14 -11   26.71   15.04
  -1 -14  11   -4.31    5.77
   1  14 -10   62.12   24.26
   1  14 -10   40.83   17.47
  -1 -14  10   25.88   18.10
   1  14  -9   19.48   14.27
   1  14  -9   19.27   13.15
  -1 -14   9   14.36   12.65
   1  14  -8   38.61   17.27
   1  14  -8   26.19   14.82
  -1 -14   8   25.54   14.46
   1  14  -7    3.24    4.63
   1  14  -7   -1.68    9.30
  -1 -14   7  -12.88    9.96
   1  14  -6   47.08   19.20
   1  14  -6   80.77   28.34
  -1 -14   6   73.09   27.32
   1  14  -5   23.82   12.66
  -1 -14   5   19.97   11.65
   1  14  -4   28.88   16.22
   1  14  -4   27.53   20.28
  -1 -14   4   18.12   10.43
   1  14  -3   73.01   27.68
   1  14  -3   60.47   21.40
  -1 -14   3   54.69   19.68
   1  14  -2   37.40   17.08
   1  14  -2   40.24   16.51
  -1 -14   2   74.61   28.51
   1  14  -1   14.84   11.73
   1  14  -1    3.98    5.79
  -1 -14   1   14.49   14.47
   1  14   0   16.37   11.85
   1  14   0   52.80   16.98
  -1 -14   0   42.75   22.15
   1  14   1   17.52   12.47
  -1 -14  -1    5.00    9.14
   1  14   2   15.16   12.58
  -1 -14  -2    8.14   11.61
   1  14   3    5.65    8.50
  -1 -14  -3   -5.96   14.69
   1  14   4   84.18   34.61
  -1 -14  -4   51.41   19.49
   1  14   5   29.40   16.74
  -1 -14  -5   15.11   14.60
   1  14   6   14.03    5.33
  -1 -14  -6    1.29    9.20
   1  14   7    8.72    8.07
   1  15 -16   11.70   11.75
   1  15 -15   17.48   14.28
   1  15 -15   36.78   16.01
   1  15 -14   -3.02    9.26
   1  15 -14   12.45   11.84
   1  15 -13   20.49   14.85
   1  15 -12   33.80   16.21
   1  15 -12    7.48   10.34
   1  15 -11   -4.40    9.37
   1  15 -11   24.27   15.34
   1  15 -10   11.66   11.69
   1  15 -10   31.11   17.73
  -1 -15  10   24.67   16.75
   1  15  -9   15.12   11.34
   1  15  -9   13.92   10.85
  -1 -15   9   -5.14    8.87
   1  15  -8   35.11   17.44
   1  15  -8   16.16   12.68
  -1 -15   8    9.12    9.53
   1  15  -7    4.31    5.63
   1  15  -7   38.73   19.80
  -1 -15   7   -4.82   10.01
   1  15  -6   53.74   19.30
   1  15  -6   45.12   22.17
  -1 -15   6   38.00   18.81
   1  15  -5   16.56   12.97
   1  15  -5    5.69    7.88
  -1 -15   5   -0.90   11.16
   1  15  -4   12.34    9.78
   1  15  -4   32.92   16.72
  -1 -15   4   17.30   12.70
   1  15  -3   62.58   20.21
   1  15  -3   80.38   20.31
  -1 -15   3   69.62   27.19
   1  15  -2   38.09   18.89
   1  15  -2   32.36   16.24
  -1 -15   2  -16.28   12.62
   1  15  -1   86.46   24.18
  -1 -15   1   33.48   18.79
   1  15   0   35.23   15.80
  -1 -15   0   10.33   10.32
   1  15   1   15.53   13.66
  -1 -15  -1   -1.38   12.85
   1  15   2   -0.19   10.22
  -1 -15  -2  -12.46   12.97
   1  15   3   -2.85    9.35
  -1 -15  -3   11.11   14.99
   1  15   4    2.77    9.33
  -1 -15  -4   17.95   12.71
   1  15   5   10.32   10.53
   1  15   6   -0.16    3.64
   1  16 -15   23.84   13.58
   1  16 -14   15.33    7.20
   1  16 -14   20.43   10.83
   1  16 -13   57.30   27.46
   1  16 -13   47.92   21.81
   1  16 -12   67.46   24.00
   1  16 -12   71.72   27.11
   1  16 -11   27.42   15.25
   1  16 -11   -7.00    9.41
   1  16 -10    1.94    5.79
   1  16 -10   16.57   11.32
  -1 -16  10    4.33    5.77
   1  16  -9   -4.08    9.63
   1  16  -9   17.84   10.74
  -1 -16   9    9.86    9.94
   1  16  -8   18.18   11.91
   1  16  -8   21.32   15.26
  -1 -16   8   19.23   15.47
   1  16  -7   16.09   13.57
   1  16  -7   -0.29   10.46
  -1 -16   7   14.82   13.69
   1  16  -6   16.74   10.66
   1  16  -6   26.38   16.10
  -1 -16   6    6.28    9.49
   1  16  -5    8.72    8.51
   1  16  -5    9.53    9.99
  -1 -16   5   26.14   16.27
   1  16  -4   19.70   13.08
   1  16  -4   28.43   17.59
  -1 -16   4   17.48   13.54
   1  16  -3   27.60   17.50
  -1 -16   3   -2.09   13.36
   1  16  -2   15.63   13.92
  -1 -16   2  -17.51   13.12
   1  16  -1   41.72   16.39
  -1 -16   1    9.37   12.90
   1  16   0   29.95   14.43
  -1 -16   0   -4.85   14.11
   1  16   1   45.84   43.99
  -1 -16  -1   11.03   12.52
   1  16   2   94.26   45.57
  -1 -16  -2   82.35   36.90
   1  16   3    9.78    9.43
   1  17 -14   11.37   11.00
   1  17 -13   -1.01    8.45
   1  17 -12   52.66   24.51
   1  17 -12   56.43   28.31
   1  17 -11   16.56   14.49
   1  17 -11   28.21   17.51
   1  17 -10   -2.56    8.14
   1  17 -10   19.84   11.77
   1  17  -9   12.79    5.66
   1  17  -9   12.11    5.78
  -1 -17   9   20.13   12.83
   1  17  -8   10.28   10.14
   1  17  -8   -9.62   10.52
  -1 -17   8   54.71   20.99
   1  17  -7    6.60    7.72
   1  17  -7   13.38   11.71
  -1 -17   7   12.68   11.84
   1  17  -6   -7.13    7.11
   1  17  -6   -3.37    9.42
  -1 -17   6   -2.44   12.44
   1  17  -5   25.72   13.22
  -1 -17   5   -0.61    6.30
   1  17  -4   -8.85   10.04
  -1 -17   4   64.57   29.16
   1  17  -3   17.09   15.47
  -1 -17   3   12.88    5.51
   1  17  -2   17.41   16.75
  -1 -17   2   41.53   20.20
   1  17  -1   13.30    8.63
  -1 -17   1   14.59    7.57
   1  17   0   33.44   17.54
   1  18 -12   13.69    6.05
   1  18 -11   -3.31    7.60
   1  18 -10   11.56   10.26
   1  18  -9   10.02    9.64
   1  18  -8   23.96   12.01
  -1 -18   8   16.55   10.13
   1  18  -7   28.96   15.58
  -1 -18   7   20.43   11.27
   1  18  -6  121.72   51.52
  -1 -18   6    9.52   10.34
   1  18  -5   21.89   11.85
  -1 -18   5   31.12   18.67
   1  18  -4   29.57   16.33
  -1 -18   4   21.22   12.46
  -1 -19   7   10.00   10.67
  -2  19  -6   -0.88    9.34
  -2  19  -7    7.55    9.83
   2 -19   7   10.13    9.53
  -2  19  -8   -1.23    9.21
   2 -19   8    7.25    8.70
  -2  18  -3   -1.22   10.57
   2 -18   3   17.12   10.77
  -2  18  -4   17.97   12.89
  -2  18  -4   37.93   20.10
   2 -18   4   14.95    7.83
  -2  18  -5   22.87   13.82
  -2  18  -5   73.85   33.08
   2 -18   5   21.33   13.36
  -2  18  -6    7.60    9.63
  -2  18  -6   -1.92    9.07
   2 -18   6    0.62    5.72
  -2  18  -7   59.17   28.85
  -2  18  -7   26.78   12.24
   2 -18   7   28.59   14.51
  -2  18  -8   13.49    8.88
  -2  18  -8   20.37   12.00
   2 -18   8   12.97   11.88
  -2  18  -9   -5.79    9.99
   2 -18   9   12.78   12.52
  -2  18 -10   -9.99    9.55
  -2  18 -11   -0.62    6.36
  -2  17   1   24.76   12.22
   2 -17  -1    8.67   10.43
  -2  17   0  146.28   70.37
   2 -17   0    9.52   10.85
  -2  17  -1   13.91   10.53
  -2  17  -1   12.83    7.59
   2 -17   1   12.42    6.98
  -2  17  -2   17.78   12.99
  -2  17  -2  -10.47   12.19
   2 -17   2   -0.89   11.44
  -2  17  -3    5.31   10.95
  -2  17  -3   16.08   14.82
   2 -17   3   -9.87    9.74
  -2  17  -4   27.18   16.16
  -2  17  -4   11.26    9.85
   2 -17   4   16.04   14.65
  -2  17  -5   57.31   20.66
  -2  17  -5   26.36   15.03
   2 -17   5   34.82   30.87
  -2  17  -6   44.76   17.96
  -2  17  -6   49.09   18.52
   2 -17   6   38.02   15.73
  -2  17  -7   20.69   15.45
  -2  17  -7   -2.33   10.65
   2 -17   7   41.87   19.60
  -2  17  -8   20.14   15.18
  -2  17  -8   48.19   18.11
   2 -17   8   23.66   16.94
  -2  17  -9   28.61   26.34
  -2  17  -9   39.89   18.75
   2 -17   9   -1.56    7.63
  -2  17 -10    8.06    8.78
  -2  17 -10   14.61   13.19
   2 -17  10   -1.04    5.64
  -2  17 -11   10.29   12.12
  -2  17 -11    5.22    6.66
  -2  17 -12   16.39   12.77
  -2  17 -12   21.19   12.58
  -2  16   3   21.36   14.37
   2 -16  -3   60.73   27.93
  -2  16   2    0.23    8.47
   2 -16  -2   16.78   15.71
  -2  16   1   25.81   14.37
  -2  16   1   34.83   30.69
   2 -16  -1  -17.96   12.57
  -2  16   0  163.21  142.13
  -2  16   0  191.12  163.29
   2 -16   0  115.69   46.55
  -2  16  -1   30.54   15.73
  -2  16  -1   -6.10    9.42
   2 -16   1   -6.78   11.71
  -2  16  -2   36.26   17.85
  -2  16  -2   12.50   12.57
   2 -16   2   35.64   15.53
  -2  16  -3   60.38   30.64
  -2  16  -3   94.73   27.95
   2 -16   3   53.62   24.46
  -2  16  -4   -5.30   12.25
  -2  16  -4   14.85   11.78
   2 -16   4   15.62   10.98
  -2  16  -5    9.39   10.71
  -2  16  -5    6.56    9.04
   2 -16   5   33.18   22.26
  -2  16  -6   68.00   21.79
  -2  16  -6   90.78   26.00
   2 -16   6   47.17   20.31
  -2  16  -7   27.33   15.66
  -2  16  -7   11.80   11.15
   2 -16   7   12.47   11.85
  -2  16  -8   19.84   13.37
  -2  16  -8   38.04   17.64
   2 -16   8   23.15   15.61
  -2  16  -9    4.78    9.19
  -2  16  -9    1.95    6.48
   2 -16   9    6.54    7.64
  -2  16 -10   63.95   22.71
  -2  16 -10   25.14   16.29
   2 -16  10   13.25   11.65
  -2  16 -11   19.07   12.86
  -2  16 -11   36.33   14.83
  -2  16 -12   -2.14   11.24
  -2  16 -13   -2.78    9.78
  -2  16 -13    5.34    7.19
  -2  16 -14  -11.47   10.59
  -2  16 -14   22.84   12.45
  -2  15   5   62.54   29.01
   2 -15  -5   11.41   12.10
  -2  15   4   14.38    7.62
   2 -15  -4   18.01   16.88
  -2  15   3   75.00   27.81
  -2  15   3   19.22   13.02
   2 -15  -3   32.41   19.11
  -2  15   2    2.97    8.01
  -2  15   2   14.87   13.89
   2 -15  -2   21.75   16.90
  -2  15   1    6.13    9.02
  -2  15   1   20.10   12.86
   2 -15  -1   25.65   17.11
  -2  15   0   67.31   55.03
  -2  15   0   95.84   28.22
   2 -15   0   66.55   53.42
  -2  15  -1   55.71   18.33
  -2  15  -1   33.16   16.82
   2 -15   1   26.92   15.34
  -2  15  -2   32.29   17.42
  -2  15  -2   23.15   16.17
   2 -15   2   21.62   15.21
  -2  15  -3  224.00   57.79
  -2  15  -3  157.35   39.62
   2 -15   3  141.16   36.31
  -2  15  -4   -5.99   11.50
  -2  15  -4   17.27   11.96
   2 -15   4   12.49   13.01
  -2  15  -5   30.12   15.75
  -2  15  -5   32.09   15.25
   2 -15   5   10.04   10.41
  -2  15  -6   -2.47   11.91
  -2  15  -6  -15.93    9.96
   2 -15   6    4.54    5.72
  -2  15  -7   42.69   22.79
  -2  15  -7   33.44   17.19
   2 -15   7   23.43   16.10
  -2  15  -8   11.88   11.00
  -2  15  -8   58.38   20.21
   2 -15   8   15.33   12.68
  -2  15  -9   10.74   11.09
  -2  15  -9   39.32   19.45
   2 -15   9    0.15    6.63
  -2  15 -10   10.87   11.83
  -2  15 -10   18.10   11.36
   2 -15  10   13.85    9.95
  -2  15 -11   39.78   24.74
  -2  15 -11   10.53    9.31
   2 -15  11   -0.43    5.50
  -2  15 -12   12.76   13.93
  -2  15 -12   10.75   10.12
  -2  15 -13   23.51   16.71
  -2  15 -13   -3.22    9.76
  -2  15 -14    0.75    5.78
  -2  15 -14   16.99   16.05
  -2  15 -15   52.45   25.41
  -2  15 -15    7.56    8.41
  -2  15 -16   25.93   12.90
   2 -14  -7   13.99    8.94
   2 -14  -6   10.86   13.33
  -2  14   5   99.18   37.32
   2 -14  -5   56.34   20.28
  -2  14   4   21.12   14.32
  -2  14   4   48.28   24.77
   2 -14  -4    5.96    8.07
  -2  14   3   19.31   15.52
  -2  14   3   41.55   23.00
   2 -14  -3   11.70   12.08
  -2  14   2   63.05   23.11
  -2  14   2   32.98   17.04
  -2  14   1   31.47   16.87
  -2  14   1   23.32   16.09
   2 -14  -1   33.21   15.85
  -2  14   0   84.11   94.33
  -2  14   0  102.93   21.28
   2 -14   0   21.42   15.61
  -2  14  -1   57.49   20.36
  -2  14  -1   67.19   24.17
   2 -14   1   29.15   15.81
  -2  14  -2  -14.82   12.42
  -2  14  -2   26.29   15.36
   2 -14   2   18.13   10.86
  -2  14  -3   48.39   20.51
  -2  14  -3   57.02   19.69
   2 -14   3   33.98   19.11
  -2  14  -4   78.00   27.79
  -2  14  -4  101.00   19.94
   2 -14   4   38.11   15.09
  -2  14  -5   72.47   22.64
  -2  14  -5   90.25   25.00
   2 -14   5   39.53   16.32
  -2  14  -6  160.44   33.67
  -2  14  -6  207.40   35.98
   2 -14   6  177.53   34.99
  -2  14  -7   38.01   17.79
  -2  14  -7   46.63   19.58
   2 -14   7   10.27   10.53
  -2  14  -8  148.80   28.75
  -2  14  -8  153.97   28.05
   2 -14   8  161.50   28.51
  -2  14  -9   26.92   18.25
  -2  14  -9   28.62   13.36
   2 -14   9  -10.73    7.12
  -2  14 -10   20.94   15.26
  -2  14 -10   22.51   16.40
   2 -14  10    6.01    6.06
  -2  14 -11   87.41   31.64
  -2  14 -11  119.00   30.26
   2 -14  11   32.10   15.75
  -2  14 -12   15.04   11.71
  -2  14 -12   12.18   10.43
  -2  14 -13    7.39    8.46
  -2  14 -13   -7.12    9.52
  -2  14 -13   -0.11    9.38
  -2  14 -14   32.82   20.83
  -2  14 -14   36.84   17.61
  -2  14 -14   11.15   11.81
  -2  14 -15   13.67   14.50
  -2  14 -15   24.78   14.37
  -2  14 -15    9.50   10.00
  -2  14 -16    9.56   10.48
  -2  14 -16   -4.30    8.72
  -2  14 -16   15.73   12.83
  -2  14 -17    7.15    9.16
  -2  14 -17   21.03   12.77
   2 -13  -9   12.72   12.27
   2 -13  -8   27.22   16.09
   2 -13  -7  -10.60   11.47
  -2  13   6   12.98   12.83
   2 -13  -6   11.68   12.29
  -2  13   5   26.12   15.90
  -2  13   5    7.23    9.51
   2 -13  -5   -4.93   11.93
  -2  13   4  214.22   54.67
  -2  13   4  258.09  264.75
   2 -13  -4  199.76   58.29
  -2  13   3   34.01   16.77
  -2  13   3   -6.44   11.50
   2 -13  -3   15.70   18.57
  -2  13   2  -12.03   11.11
  -2  13   2    5.42    9.95
   2 -13  -2   -6.45   11.70
  -2  13   1   60.42   22.03
  -2  13   1   85.03   60.57
   2 -13  -1   29.79   16.29
   2 -13  -1   36.27   19.51
  -2  13   0   18.32   18.26
  -2  13   0   -1.76    9.98
   2 -13   0    1.46    2.38
   2 -13   0   24.85   13.28
  -2  13  -1   24.64   14.66
  -2  13  -1   11.28    8.93
   2 -13   1    9.66    8.11
   2 -13   1   -7.05    9.92
  -2  13  -2   -5.13   10.16
  -2  13  -2   14.55   11.13
   2 -13   2   19.81   12.02
  -2  13  -3   -5.78   10.63
  -2  13  -3   -9.28    9.86
   2 -13   3   -1.82    9.62
  -2  13  -4   -5.60   11.33
  -2  13  -4    9.31    8.71
   2 -13   4   10.37    8.33
  -2  13  -5  174.00   25.69
  -2  13  -5  224.24   18.87
   2 -13   5  169.09   23.74
  -2  13  -6   14.85   16.90
  -2  13  -6   33.53   16.35
   2 -13   6   13.82   10.74
  -2  13  -7   27.48   14.23
  -2  13  -7   21.40   12.48
   2 -13   7   55.23   18.92
  -2  13  -8   70.73   18.37
  -2  13  -8   72.39   20.19
   2 -13   8   57.31   19.42
  -2  13  -9   15.04   10.55
  -2  13  -9   14.67   11.42
   2 -13   9   15.84   10.62
  -2  13 -10    1.95    5.40
  -2  13 -10   10.57   10.94
   2 -13  10   22.90   12.11
  -2  13 -11  398.99  445.04
  -2  13 -11  413.08  460.75
  -2  13 -11  324.53   59.97
   2 -13  11  334.38   67.28
  -2  13 -12   -4.41    9.90
  -2  13 -12   15.62   18.12
  -2  13 -12   10.85   11.07
  -2  13 -13   10.48   11.15
  -2  13 -13   14.04   11.77
  -2  13 -13  -16.15   11.73
  -2  13 -14  129.24   41.74
  -2  13 -14  126.81   38.74
  -2  13 -14  123.67   36.97
  -2  13 -15   -7.86    9.70
  -2  13 -15   13.59   12.86
  -2  13 -15   17.10   11.23
  -2  13 -16   24.65   17.68
  -2  13 -16   16.00   13.17
  -2  13 -17   18.40   11.57
  -2  13 -17   13.12   11.93
  -2  13 -17   25.30   17.01
  -2  13 -18   13.32    7.40
  -2  13 -18   25.70   15.89
   2 -12 -10   26.00   13.29
   2 -12  -9   21.43   13.85
   2 -12  -8    8.54    9.15
  -2  12   7   15.01   11.82
   2 -12  -7   -4.64   10.72
  -2  12   6   14.59   14.79
   2 -12  -6    3.69    3.99
   2 -12  -6    9.99   10.91
  -2  12   5   40.37   19.44
  -2  12   5   -7.36    8.22
   2 -12  -5    7.16    6.76
   2 -12  -5   24.33   16.77
  -2  12   4   15.04   11.93
  -2  12   4   16.61   10.16
   2 -12  -4    5.36    6.41
   2 -12  -4   14.09   13.78
  -2  12   3   20.94   15.32
  -2  12   3   17.07   14.46
   2 -12  -3    4.64    5.71
   2 -12  -3   11.67   12.39
  -2  12   2   33.10   16.70
  -2  12   2   15.18   10.16
   2 -12  -2    7.76    7.55
   2 -12  -2   18.71   13.98
  -2  12   1  159.06   21.31
  -2  12   1  155.12   21.86
   2 -12  -1  121.47   33.27
   2 -12  -1  137.11   18.20
  -2  12   0   41.34   16.25
  -2  12   0   54.38   21.57
   2 -12   0   27.12   14.73
   2 -12   0   45.93   18.15
  -2  12  -1   91.69   25.18
  -2  12  -1  106.19   27.45
   2 -12   1   83.73   22.64
  -2  12  -2  101.18   26.32
  -2  12  -2  103.60   27.30
   2 -12   2   96.32   25.67
  -2  12  -3  188.94   23.34
  -2  12  -3  185.35   32.49
   2 -12   3  107.27   25.92
   2 -12   3  185.89   19.66
  -2  12  -4   67.43   24.30
  -2  12  -4   77.99   28.21
   2 -12   4   36.09   13.46
   2 -12   4   52.22   20.12
  -2  12  -5  -10.09   10.13
  -2  12  -5   11.67    7.42
   2 -12   5   -0.17    2.68
   2 -12   5   22.33   12.56
  -2  12  -6    3.90    5.67
  -2  12  -6   -2.81    9.38
   2 -12   6   -4.76    9.25
  -2  12  -7   12.14   10.13
  -2  12  -7    2.35    5.91
   2 -12   7   -5.81    7.68
  -2  12  -8   25.52   12.37
   2 -12   8   28.93   14.75
  -2  12  -8    9.96    8.34
   2 -12   8   19.89   12.74
  -2  12  -9   18.56   11.80
   2 -12   9   18.45   12.35
  -2  12  -9   29.00   13.69
   2 -12   9    4.06    4.64
  -2  12 -10   31.39   15.36
   2 -12  10   38.98   16.14
  -2  12 -10   32.07   14.55
  -2  12 -10   18.32   14.06
   2 -12  10   20.32   11.82
  -2  12 -11   26.98   12.87
   2 -12  11   12.86   11.35
  -2  12 -11    9.76    9.16
  -2  12 -11   15.16   10.69
   2 -12  11   28.09   13.54
  -2  12 -12   10.83   11.65
   2 -12  12   30.73   17.55
  -2  12 -12    8.34   10.12
  -2  12 -12   12.54   10.75
   2 -12  12   16.61    8.80
  -2  12 -13  114.07   29.45
   2 -12  13  106.27   21.40
  -2  12 -13  105.97   21.29
  -2  12 -13  136.64   41.64
  -2  12 -14   -3.85   10.30
   2 -12  14   36.16   21.41
  -2  12 -14   12.18   14.00
  -2  12 -15    6.53    9.73
   2 -12  15  -17.65    9.11
  -2  12 -15   22.82   14.09
  -2  12 -15   14.83   10.37
  -2  12 -16   24.15   13.75
   2 -12  16   17.68   12.74
  -2  12 -16   39.19   14.90
  -2  12 -16   40.41   17.97
  -2  12 -17   22.95   13.95
   2 -12  17   29.99   17.64
  -2  12 -17   41.38   20.31
  -2  12 -17   36.01   15.75
  -2  12 -18   19.68   11.16
  -2  12 -18   18.36   12.82
  -2  12 -18   21.26   13.25
   2 -11 -12   -2.95    9.28
   2 -11 -11   20.53   11.05
   2 -11 -10   17.31   14.87
  -2  11   9  124.45   43.03
   2 -11  -9   76.42   31.12
   2 -11  -9   67.95   24.49
  -2  11   8   25.18   17.30
   2 -11  -8   39.65   20.34
   2 -11  -8   21.93   15.19
  -2  11   7   26.11   15.07
   2 -11  -7   12.89    9.29
   2 -11  -7   13.40   11.58
  -2  11   6   49.14   20.56
   2 -11  -6   25.82   13.57
   2 -11  -6   47.21   19.86
  -2  11   5   19.38   13.95
  -2  11   5    2.31    6.00
   2 -11  -5    8.37    6.78
   2 -11  -5    8.31    7.36
  -2  11   4   61.45   25.08
  -2  11   4   19.34   14.93
   2 -11  -4   -6.24    4.46
   2 -11  -4    4.57    6.69
  -2  11   3   17.36   12.56
  -2  11   3   38.71   13.95
   2 -11  -3   40.65   14.49
   2 -11  -3   59.02   23.24
  -2  11   2   22.82   12.14
  -2  11   2   29.65   14.25
   2 -11  -2   19.61   12.05
   2 -11  -2   18.96   12.92
  -2  11   1    9.65    8.22
  -2  11   1   10.08    8.07
   2 -11  -1   11.09    8.13
   2 -11  -1   10.35    7.57
   2 -11  -1   20.72   12.62
  -2  11   0   -2.01   11.29
  -2  11   0    4.86    4.03
   2 -11   0   -0.03    4.55
   2 -11   0    4.83    4.74
  -2  11  -1   13.91   10.85
  -2  11  -1   40.20   18.00
   2 -11   1   -0.10    4.23
   2 -11   1   50.21   19.43
  -2  11  -2  204.37   49.96
  -2  11  -2  198.92   57.93
   2 -11   2  154.65   39.72
   2 -11   2  225.73   25.55
  -2  11  -3   74.14   20.45
  -2  11  -3   56.91   20.44
   2 -11   3   34.77   13.99
   2 -11   3   66.80   24.13
  -2  11  -4   85.48   24.83
  -2  11  -4   90.22   26.01
   2 -11   4   51.75   17.88
   2 -11   4   80.64   23.68
  -2  11  -5  138.16   33.67
  -2  11  -5  127.04   32.73
   2 -11   5  116.25   26.82
   2 -11   5  124.91   28.58
  -2  11  -6  133.08   34.24
   2 -11   6  184.95   46.47
  -2  11  -6  155.15   37.39
   2 -11   6   95.79   28.15
   2 -11   6  151.99   33.99
  -2  11  -7   97.78   28.53
   2 -11   7   67.39   23.59
  -2  11  -7   75.38   22.03
   2 -11   7   69.09   24.50
  -2  11  -8   45.46   18.60
   2 -11   8   37.99   16.35
  -2  11  -8   21.17   11.45
  -2  11  -8   32.75   13.03
   2 -11   8   44.28   16.10
  -2  11  -9    6.42    7.17
   2 -11   9   20.08   13.20
  -2  11  -9    6.15    6.19
  -2  11  -9    1.50    9.26
   2 -11   9   -3.04    5.90
  -2  11 -10    5.06    5.81
   2 -11  10   -1.28   11.13
  -2  11 -10   11.70    9.95
  -2  11 -10   10.34   10.43
   2 -11  10   15.71    9.99
  -2  11 -11   -6.71   10.20
   2 -11  11   -9.87    9.69
  -2  11 -11   -2.69    8.53
  -2  11 -11   -9.22   10.74
   2 -11  11   -1.44    4.56
  -2  11 -12   84.47   30.27
   2 -11  12   70.96   21.28
  -2  11 -12   74.35   21.13
  -2  11 -12   83.88   21.26
   2 -11  12   71.36   18.21
  -2  11 -13   30.00   16.55
   2 -11  13   17.13   11.00
  -2  11 -13   12.38    8.50
  -2  11 -13   37.45   27.56
  -2  11 -14   25.56   17.47
   2 -11  14    9.89    8.99
  -2  11 -14   13.81   11.29
  -2  11 -14    6.01    6.82
  -2  11 -15   11.73   10.32
   2 -11  15   40.96   23.82
  -2  11 -15   23.85   15.00
  -2  11 -15  -10.15   10.88
   2 -11  16   14.09   12.51
  -2  11 -16   -0.36    8.78
  -2  11 -16   11.41   10.70
   2 -11  17    9.11   12.67
  -2  11 -17   -6.11    8.36
  -2  11 -17   17.43   14.10
   2 -11  18   15.50    6.83
  -2  11 -18   50.09   22.96
  -2  11 -18   13.59    6.41
  -2  11 -19   11.59   10.25
  -2  11 -19   20.28   12.55
   2 -10 -13   -1.88    6.13
   2 -10 -12   16.99    9.59
   2 -10 -12   24.58   13.35
   2 -10 -11   -3.49    5.56
   2 -10 -11   21.63   15.67
  -2  10  10    6.39    7.84
   2 -10 -10  -11.91    5.89
   2 -10 -10    5.47   12.23
  -2  10   9   22.26   14.22
  -2  10   9    4.50    5.10
   2 -10  -9    9.74    8.63
   2 -10  -9   34.24   18.01
  -2  10   8  145.09   31.16
   2 -10  -8  110.42   23.89
   2 -10  -8  104.72   24.10
  -2  10   7   22.60   14.29
   2 -10  -7   14.17    9.38
   2 -10  -7   34.68   18.22
  -2  10   6   24.54   12.79
  -2  10   6   16.46   12.65
   2 -10  -6   15.83   10.93
   2 -10  -6   17.31   12.52
  -2  10   5   44.59   17.46
  -2  10   5   54.93   18.06
   2 -10  -5   71.32   23.49
   2 -10  -5   66.93   22.69
  -2  10   4   -3.48   13.86
  -2  10   4   -7.14    9.66
   2 -10  -4   -0.16    4.44
   2 -10  -4    2.87    5.96
  -2  10   3  113.39   29.38
  -2  10   3  192.37   22.64
   2 -10  -3  126.31   30.31
   2 -10  -3  153.10   40.51
  -2  10   2    7.42    7.29
  -2  10   2    9.75    7.85
   2 -10  -2    8.84    8.39
   2 -10  -2    3.66    6.88
  -2  10   1   18.06   11.42
  -2  10   1   13.57   10.55
   2 -10  -1   -0.10    4.62
   2 -10  -1  -14.47    9.89
  -2  10   0   71.79   18.74
  -2  10   0   62.45   21.79
   2 -10   0   48.15   16.25
   2 -10   0   91.48   22.04
  -2  10  -1   -3.50    8.58
  -2  10  -1   14.59    9.60
   2 -10   1   12.66    7.92
   2 -10   1    9.87    9.89
  -2  10  -2   32.81   14.91
  -2  10  -2    6.73    4.80
   2 -10   2   15.84    9.66
   2 -10   2   13.98    9.09
  -2  10  -3  146.98   32.34
  -2  10  -3  137.33   31.14
   2 -10   3  132.45   27.32
   2 -10   3  149.06   29.66
  -2  10  -4    8.20    3.90
  -2  10  -4   11.17    6.74
   2 -10   4   11.17    7.01
   2 -10   4   20.79    9.14
  -2  10  -5   46.58   16.91
   2 -10   5   44.33   15.56
  -2  10  -5   29.53   12.93
   2 -10   5   24.78   10.61
   2 -10   5   28.60   12.55
  -2  10  -6   19.29    9.77
   2 -10   6   35.54   13.17
  -2  10  -6   -9.70    8.28
   2 -10   6    6.98    5.74
   2 -10   6   -6.85    7.03
  -2  10  -7   14.32   10.69
   2 -10   7   36.36   14.25
  -2  10  -7   36.66   13.26
  -2  10  -7   60.85   21.75
   2 -10   7   46.09   15.90
  -2  10  -8   -7.70    9.24
   2 -10   8   17.18   10.13
  -2  10  -8    0.95    3.65
  -2  10  -8   19.24   10.86
   2 -10   8   10.90    7.39
  -2  10  -9  -17.12    9.28
   2 -10   9    6.26    6.30
  -2  10  -9   17.49   10.66
  -2  10  -9    1.56    5.67
   2 -10   9   10.58    7.52
  -2  10 -10  185.12   25.12
   2 -10  10  180.16   28.38
  -2  10 -10  176.62   22.97
  -2  10 -10  125.65   31.00
   2 -10  10  166.15   19.30
  -2  10 -11   -6.13    9.52
   2 -10  11   21.34   13.28
  -2  10 -11    5.27    4.49
  -2  10 -11   15.37   13.61
   2 -10  11    0.53    3.48
   2 -10  12   37.42   16.01
  -2  10 -12   34.11   15.93
  -2  10 -12   74.98   26.15
   2 -10  12   38.04   13.60
   2 -10  13  132.19   22.65
  -2  10 -13  169.90   29.87
  -2  10 -13  181.29   32.01
   2 -10  14   75.61   31.57
  -2  10 -14   62.42   24.11
  -2  10 -14   31.68   16.79
   2 -10  15   -3.82    8.90
  -2  10 -15   -3.89    8.82
  -2  10 -15  -17.37   12.53
   2 -10  16   36.35   18.36
  -2  10 -16   19.78    9.12
  -2  10 -16   27.38   17.57
   2 -10  17   -7.06    7.54
  -2  10 -17   -2.80    8.57
  -2  10 -17   16.05   15.19
  -2  10 -18   17.01   16.81
  -2  10 -18    4.47    5.86
  -2  10 -19   17.14   10.56
  -2  10 -19    9.56   10.48
   2  -9 -14   11.26    9.71
   2  -9 -13   22.92   12.11
   2  -9 -13   16.20    9.54
  -2   9  12  -13.86    8.04
   2  -9 -12   11.04    9.20
   2  -9 -12   -4.43   10.37
  -2   9  11   11.62   10.95
   2  -9 -11    8.41    7.92
   2  -9 -11   17.67   11.35
  -2   9  10    3.96    7.91
   2  -9 -10   12.52    9.41
   2  -9 -10   23.65   17.90
  -2   9   9   49.71   24.02
  -2   9   9    7.08    6.64
   2  -9  -9    9.64    8.55
   2  -9  -9   44.86   22.51
  -2   9   8    5.00    7.38
   2  -9  -8   28.51   13.91
   2  -9  -8   -9.02    9.80
  -2   9   7   10.23    8.21
   2  -9  -7   32.85   15.01
   2  -9  -7   38.23   16.53
  -2   9   6   -2.89   14.40
   2  -9  -6   19.36   12.26
   2  -9  -6   -5.58   11.16
  -2   9   5   69.48   25.67
  -2   9   5   84.54   22.26
   2  -9  -5   77.14   28.24
   2  -9  -5   79.29   29.15
  -2   9   4   -2.38   13.12
  -2   9   4   -4.50    9.88
   2  -9  -4    5.77    5.19
   2  -9  -4  -19.60   10.09
  -2   9   3   76.85   21.84
  -2   9   3   99.39   31.85
   2  -9  -3    7.34    7.99
  -2   9   2  172.05   40.65
  -2   9   2  172.70   40.76
   2  -9  -2  165.93   40.68
  -2   9   1   -3.77    9.17
  -2   9   1   15.07    9.24
   2  -9  -1   39.23   14.98
  -2   9   0   48.97   19.56
  -2   9   0   26.38   11.48
   2  -9   0   23.88   10.03
   2  -9   0   51.17   13.51
  -2   9  -1  130.15   26.03
  -2   9  -1  164.13   28.18
   2  -9   1  124.17   21.30
   2  -9   1  162.77   24.07
  -2   9  -2  619.33   42.02
  -2   9  -2  613.12   41.27
   2  -9   2  648.63   43.90
   2  -9   2  658.78   49.90
  -2   9  -3   15.89    7.02
   2  -9   3   13.95    7.22
  -2   9  -3   11.30    7.16
   2  -9   3    8.14    5.59
   2  -9   3   18.18    8.60
  -2   9  -4  102.52   18.65
   2  -9   4  153.87   24.10
  -2   9  -4  119.49   25.08
   2  -9   4  101.36   17.59
   2  -9   4  110.31   20.77
  -2   9  -5   75.67   19.02
   2  -9   5   72.25   18.26
  -2   9  -5   74.97   18.81
   2  -9   5   61.60   15.34
   2  -9   5   66.92   16.08
  -2   9  -6  308.80   46.67
   2  -9   6  321.19   36.50
  -2   9  -6  263.87   50.45
  -2   9  -6  312.43   38.22
   2  -9   6  231.89   40.10
   2  -9   6  297.35  218.18
  -2   9  -7   48.17   18.44
   2  -9   7   67.41   16.41
  -2   9  -7   50.16   19.60
  -2   9  -7   47.79   18.81
   2  -9   7   50.29   19.07
  -2   9  -8   16.10   10.68
   2  -9   8   22.63   11.00
  -2   9  -8   16.92   10.75
  -2   9  -8   19.45   13.39
   2  -9   8   20.10    9.30
  -2   9  -9   79.97   23.26
   2  -9   9   96.27   28.36
  -2   9  -9   56.17   20.01
  -2   9  -9   80.99   28.15
   2  -9   9   74.51   20.07
   2  -9  10   14.80   15.23
  -2   9 -10   -5.99    7.59
  -2   9 -10  -11.41   10.63
   2  -9  10   13.40    9.63
   2  -9  11   10.51    8.79
  -2   9 -11   22.14   13.22
  -2   9 -11   25.80   14.98
   2  -9  11   -1.63    4.02
   2  -9  12   13.27   10.31
  -2   9 -12   -3.43    8.87
  -2   9 -12   -3.19   11.03
   2  -9  12   -1.21    2.36
   2  -9  13   62.98   21.25
  -2   9 -13   75.11   21.16
  -2   9 -13   67.96   18.01
   2  -9  14   93.11   18.28
  -2   9 -14   91.56   27.68
  -2   9 -14  100.39   18.49
   2  -9  15   17.46   13.96
  -2   9 -15   16.77   13.46
  -2   9 -15   27.63   13.36
   2  -9  16   32.74   27.19
  -2   9 -16   22.51   14.48
  -2   9 -16   12.83   12.94
   2  -9  17   -2.30    7.53
  -2   9 -17   31.55   15.28
  -2   9 -17   31.60   15.32
  -2   9 -18  -14.39    8.31
  -2   9 -18   14.17   12.33
  -2   9 -19   23.48   12.34
  -2   9 -19   12.99   14.70
   2  -8 -15   13.03   11.21
   2  -8 -14    6.54    8.19
   2  -8 -13   34.45   17.23
   2  -8 -13   22.26   15.90
  -2   8  12   20.86   14.67
   2  -8 -12   14.17   12.02
   2  -8 -12   -9.01    9.16
  -2   8  11   51.62   25.61
   2  -8 -11   32.63   16.23
   2  -8 -11   14.04   10.62
  -2   8  10   57.21   27.71
  -2   8  10   31.22   15.06
   2  -8 -10   52.84   59.18
   2  -8 -10   62.20   25.28
  -2   8   9   41.07   17.85
  -2   8   9   24.26   11.53
   2  -8  -9   67.84   61.61
   2  -8  -9   25.30   12.85
  -2   8   8    9.34    8.04
   2  -8  -8   -1.22    6.11
   2  -8  -8   -3.79    9.66
  -2   8   7   99.50   26.09
   2  -8  -7  106.66   24.87
   2  -8  -7   60.52   24.73
  -2   8   6   38.02   15.24
   2  -8  -6   17.96   10.94
   2  -8  -6   23.23   13.41
  -2   8   5   32.41   15.13
  -2   8   5   27.42   13.86
   2  -8  -5   32.41   13.19
   2  -8  -5   24.72   16.34
  -2   8   4   53.18   20.59
  -2   8   4   -0.62   10.63
   2  -8  -4   16.02    9.38
   2  -8  -4   34.76   14.52
  -2   8   3   16.21   10.15
  -2   8   3   13.95    9.25
   2  -8  -3   12.21    6.88
   2  -8  -3   32.03   12.68
  -2   8   2   73.30   19.71
  -2   8   2   87.69   16.58
   2  -8  -2   95.31   20.25
   2  -8  -2   98.81   19.24
  -2   8   1   23.30   11.05
  -2   8   1    7.81    5.97
   2  -8  -1   13.69    6.72
  -2   8   0  110.96   26.86
  -2   8   0   99.68   21.60
   2  -8   0  138.50   25.61
  -2   8  -1  276.63   43.32
  -2   8  -1  226.87   33.32
   2  -8   1  239.03   27.70
   2  -8   1  280.60   34.35
  -2   8  -2  744.43   33.57
   2  -8   2  817.01   41.50
  -2   8  -2  829.86   35.15
   2  -8   2  813.94   36.46
   2  -8   2  822.95   34.67
  -2   8  -3  201.28   32.63
   2  -8   3  221.52   36.47
  -2   8  -3  191.85   35.10
   2  -8   3  188.32   30.40
   2  -8   3  204.55   29.40
  -2   8  -4   31.26    8.88
   2  -8   4   39.46    9.45
  -2   8  -4   21.47    8.80
   2  -8   4   23.83    9.10
   2  -8   4   22.43    9.27
  -2   8  -5  615.50   28.74
   2  -8   5  629.44   33.91
  -2   8  -5  606.61   47.27
   2  -8   5  620.53   31.90
   2  -8   5  631.36   26.65
  -2   8  -6  379.94   39.07
   2  -8   6  325.60   26.02
  -2   8  -6  349.38   44.21
  -2   8  -6  473.83   55.32
   2  -8   6  348.89   29.57
  -2   8  -7    6.56    5.58
   2  -8   7   33.96   12.47
  -2   8  -7   18.24    7.88
  -2   8  -7    3.68    6.78
  -2   8  -8   56.01   14.88
   2  -8   8   65.92   17.75
  -2   8  -8   10.12    6.85
  -2   8  -8   43.24   16.32
   2  -8   9   11.25    7.11
  -2   8  -9   14.59    9.67
  -2   8  -9    9.35    8.80
   2  -8   9   17.83   14.94
   2  -8  10   36.73   17.11
  -2   8 -10   27.80   12.03
  -2   8 -10   18.45   11.74
   2  -8  10   42.14   17.07
   2  -8  11    9.57    7.64
  -2   8 -11   12.79    8.34
  -2   8 -11    9.60    7.89
   2  -8  11    4.37    5.17
   2  -8  11    6.28    5.05
   2  -8  12   93.96   23.50
  -2   8 -12   88.64   22.61
  -2   8 -12   76.92   20.49
   2  -8  12   72.06   27.20
   2  -8  13   50.60   18.04
  -2   8 -13   45.87   17.73
  -2   8 -13   50.75   21.30
   2  -8  14   17.59   13.49
  -2   8 -14   20.14   14.02
  -2   8 -14   34.98   14.98
   2  -8  15  145.27   31.34
  -2   8 -15  105.29   20.98
  -2   8 -15   90.16   19.59
   2  -8  16   37.00   18.42
  -2   8 -16   17.80   12.40
  -2   8 -16   31.21   18.68
   2  -8  17   40.99   19.05
  -2   8 -17   41.32   17.84
  -2   8 -17   38.28   38.25
  -2   8 -18   28.94   15.47
  -2   8 -18   38.57   15.82
  -2   8 -19   10.43   12.69
  -2   8 -19   -9.37   10.64
  -2   8 -20   16.39    9.93
   2  -7 -15   17.91   11.46
   2  -7 -14   10.95   10.68
   2  -7 -14   24.09   14.69
   2  -7 -13   -1.32    7.95
   2  -7 -13   15.01   13.82
  -2   7  12   35.45   19.66
   2  -7 -12   34.10   19.99
   2  -7 -12   31.65   16.76
   2  -7 -11   12.35    9.80
   2  -7 -11   22.23   15.43
  -2   7  10   59.05   19.16
  -2   7  10   18.09   12.21
   2  -7 -10   35.82   15.00
   2  -7 -10   19.19   13.19
  -2   7   9   17.31   11.61
   2  -7  -9    3.58    6.72
   2  -7  -9    4.98    5.67
  -2   7   8   11.98   10.52
   2  -7  -8   12.49    9.52
   2  -7  -8   38.26   17.00
  -2   7   7  306.04   46.60
  -2   7   7  219.86   15.23
   2  -7  -7  275.23   30.76
   2  -7  -7  259.01   31.64
  -2   7   6    6.98    5.75
   2  -7  -6   16.74   10.48
   2  -7  -6   26.24   12.55
  -2   7   5   67.23   18.58
  -2   7   5   38.97   16.21
  -2   7   5   70.66   17.67
   2  -7  -5   69.70   16.81
   2  -7  -5   78.36   19.81
  -2   7   4  231.06   41.19
  -2   7   4  104.44   23.96
  -2   7   4  176.53   30.18
   2  -7  -4  164.52   30.89
   2  -7  -4  198.54   35.68
  -2   7   3   52.71   13.80
   2  -7  -3   23.51    9.36
  -2   7   3   32.64   11.75
  -2   7   3   39.45   10.66
   2  -7  -3   58.95   14.57
   2  -7  -3   50.18   13.42
  -2   7   2    5.97    4.85
   2  -7  -2    2.68    2.78
  -2   7   2    7.25    4.99
  -2   7   2  -14.48    8.34
   2  -7  -2   -5.31    8.36
  -2   7   1   66.22   20.66
   2  -7  -1   45.29   10.25
  -2   7   1   60.44   13.64
  -2   7   1   75.70   14.88
   2  -7  -1   83.32   17.29
  -2   7   0   16.02    8.98
   2  -7   0   14.61    8.63
  -2   7   0    7.15    4.12
   2  -7   0    7.90    5.06
  -2   7  -1   67.73   21.98
   2  -7   1   67.18   14.74
   2  -7   1   81.79   50.33
  -2   7  -1   59.41   14.05
  -2   7  -1   77.79   20.15
   2  -7   1   69.27   15.86
   2  -7   1   78.42   17.63
   2  -7   1   69.72   16.15
  -2   7  -2  -10.11    8.30
   2  -7   2    5.27    3.70
  -2   7  -2    9.37    5.70
  -2   7  -2    0.21    4.38
   2  -7   2    4.45    3.22
   2  -7   2   18.07    8.77
   2  -7   2    2.66    3.58
  -2   7  -3   -2.57    8.96
   2  -7   3    7.30    5.89
  -2   7  -3    3.66    4.69
  -2   7  -3   -4.56    7.51
   2  -7   3   -0.29    4.74
   2  -7   3    6.98    4.15
  -2   7  -4   34.84    8.47
   2  -7   4   42.11   10.89
  -2   7  -4   18.81    9.29
  -2   7  -4   32.01    9.48
   2  -7   4   27.64    6.91
   2  -7   4   17.85    8.89
  -2   7  -5   16.42    7.49
  -2   7  -5   22.66    9.37
   2  -7   5   13.51    5.22
  -2   7  -5   29.08    9.36
   2  -7   5   23.54    8.57
  -2   7  -6   36.76    9.20
   2  -7   6   46.26   10.90
  -2   7  -6   41.08   10.51
  -2   7  -6   62.58   14.02
   2  -7   6   48.41   10.22
  -2   7  -7   71.78   18.89
   2  -7   7   92.55   17.83
  -2   7  -7   49.54   12.87
  -2   7  -7   71.82   17.73
   2  -7   7   49.64   11.95
   2  -7   8  240.67   39.76
  -2   7  -8  240.02   45.83
  -2   7  -8  270.05   37.77
   2  -7   9  111.35   23.29
  -2   7  -9  119.27   24.63
  -2   7  -9  109.32   24.54
   2  -7  10  178.79   42.98
  -2   7 -10  205.28   47.24
  -2   7 -10  207.40   48.31
   2  -7  10  172.90   40.67
   2  -7  11  201.60   46.86
  -2   7 -11  168.12   43.48
  -2   7 -11  191.01   48.34
   2  -7  11  109.78   33.60
   2  -7  12   71.39   25.78
  -2   7 -12   96.85   22.65
  -2   7 -12   33.63   13.29
   2  -7  12   37.03   13.92
   2  -7  12   39.70   15.00
   2  -7  13   25.45   11.94
  -2   7 -13   26.56   11.70
  -2   7 -13   66.75   25.97
   2  -7  14   28.12   13.58
  -2   7 -14    7.61    9.46
  -2   7 -14   45.75   15.04
   2  -7  15   13.92   11.78
  -2   7 -15   23.51   12.77
  -2   7 -15   31.31   18.05
   2  -7  16   14.75   11.18
  -2   7 -16   21.74   15.30
  -2   7 -16   35.47   18.33
   2  -7  17    6.06    7.32
  -2   7 -17   33.97   15.59
  -2   7 -17   -2.89   12.73
  -2   7 -18   40.88   15.97
  -2   7 -18  -13.56   12.64
  -2   7 -19   11.84   10.58
  -2   7 -19   16.86   12.96
  -2   7 -20   15.99    9.39
   2  -6 -16   17.31   10.35
   2  -6 -15   25.06   13.95
   2  -6 -14   19.73   13.51
   2  -6 -14   19.08   12.76
   2  -6 -13    2.35    4.70
   2  -6 -13   24.20   15.14
  -2   6  12    8.96   10.00
   2  -6 -12   10.05   10.84
   2  -6 -12    0.13    5.00
  -2   6  11   13.65   10.57
   2  -6 -11    9.19    7.90
   2  -6 -11   -0.04    7.70
  -2   6  10   21.37   12.89
  -2   6  10    3.36    4.11
   2  -6 -10   27.82   13.53
   2  -6 -10    8.66   10.60
  -2   6   9   10.72    8.94
  -2   6   9   -4.25    3.23
   2  -6  -9   22.55   11.20
   2  -6  -9    8.92    7.15
  -2   6   8  186.75   44.49
  -2   6   8   82.70   27.53
  -2   6   8  153.33   33.96
   2  -6  -8  190.45   47.84
   2  -6  -8  177.75   40.11
  -2   6   7   32.11   12.90
  -2   6   7   13.78    7.76
   2  -6  -7   29.67   13.38
   2  -6  -7   28.77   13.33
  -2   6   6   18.74   15.54
  -2   6   6    8.68    3.45
   2  -6  -6   16.88    9.78
   2  -6  -6   31.81   13.41
  -2   6   5  274.99   96.26
  -2   6   5  266.88   34.05
  -2   6   5  326.64   46.84
   2  -6  -5  320.91   39.57
   2  -6  -5  287.84   98.62
  -2   6   4  412.93   57.57
   2  -6  -4  413.25   40.79
  -2   6   4  414.82   17.90
  -2   6   4  421.86   21.85
   2  -6  -4  448.86   20.69
   2  -6  -4  411.28   24.50
  -2   6   3  142.41   30.77
   2  -6  -3  134.50   25.42
  -2   6   3  126.74   22.60
  -2   6   3  163.11   25.83
   2  -6  -3  132.25   25.52
   2  -6  -3  173.85   23.85
  -2   6   2 1513.65   47.36
   2  -6  -2 1514.26   45.38
  -2   6   2 1468.20   42.64
  -2   6   2 1373.02   41.14
   2  -6  -2 1450.08   42.61
   2  -6  -2 1550.89   45.93
  -2   6   1  208.88   30.25
   2  -6  -1  212.13   27.48
  -2   6   1  186.27   22.14
  -2   6   1  244.66   34.59
   2  -6  -1  198.31   25.88
   2  -6  -1  256.12   35.92
  -2   6   0   15.88    8.54
   2  -6   0   42.88    8.25
   2  -6   0   42.79    9.09
  -2   6   0   34.92    6.71
   2  -6   0   35.18    6.64
   2  -6   0   27.05   11.23
  -2   6  -1 1082.50   30.56
   2  -6   1 1131.51   37.07
   2  -6   1 1070.67   29.56
  -2   6  -1 1076.85   28.86
  -2   6  -1 1094.03   28.40
   2  -6   1 1112.84   33.39
   2  -6   1 1131.62   34.06
  -2   6  -2   52.68   10.09
   2  -6   2   26.64   10.74
   2  -6   2   48.99   10.06
  -2   6  -2   34.27    5.65
  -2   6  -2   47.56    8.88
   2  -6   2   31.13   14.60
   2  -6   2   41.72    7.18
  -2   6  -3   96.74   17.49
   2  -6   3   73.84   11.75
  -2   6  -3   58.79    9.19
  -2   6  -3   75.07   15.79
   2  -6   3   67.80   12.39
   2  -6   3   64.23   10.17
  -2   6  -4  106.83   14.85
   2  -6   4  120.03   18.02
  -2   6  -4   82.22   51.04
  -2   6  -4  104.63   15.17
   2  -6   4  114.80   19.47
  -2   6  -4  123.62   19.48
   2  -6   4   98.77   10.88
  -2   6  -5    5.85    4.31
   2  -6   5    4.83    4.39
  -2   6  -5   10.25    5.44
  -2   6  -5    3.18    3.82
   2  -6   5    5.43    3.66
  -2   6  -5    0.28    5.58
   2  -6   5   -1.74    5.35
   2  -6   6   -1.96    8.40
  -2   6  -6   11.62    5.93
  -2   6  -6   10.75   10.37
   2  -6   6    9.88    4.91
  -2   6  -6   11.34    6.74
   2  -6   6   14.01    7.92
   2  -6   7   18.95    9.27
  -2   6  -7   31.36    9.29
   2  -6   7    8.79    6.04
  -2   6  -7   -2.32    8.70
   2  -6   7   10.77    6.31
   2  -6   8   50.53   12.78
  -2   6  -8   48.34   12.38
  -2   6  -8   53.65   14.44
   2  -6   9   25.40   10.08
  -2   6  -9   44.35   16.43
  -2   6  -9   16.92   11.57
   2  -6   9   14.50    9.30
   2  -6  10   97.40   22.39
  -2   6 -10   74.90   18.56
  -2   6 -10   97.47   21.76
   2  -6  10   78.03   18.77
   2  -6  11  507.59   54.38
  -2   6 -11  508.14   49.68
  -2   6 -11  485.26   62.54
   2  -6  11  479.42   30.51
   2  -6  12  142.16   34.04
  -2   6 -12  138.91   34.09
  -2   6 -12   82.06   29.73
   2  -6  12   76.31   27.45
   2  -6  13  250.35   23.92
  -2   6 -13  258.08   28.07
  -2   6 -13  231.48   22.74
   2  -6  14   58.42   18.89
  -2   6 -14   24.41   12.34
  -2   6 -14   40.14   15.62
   2  -6  15   23.11   12.84
  -2   6 -15    8.08    8.83
  -2   6 -15   16.38   13.74
   2  -6  16  104.10   28.68
  -2   6 -16  120.76   33.19
  -2   6 -16  140.86   36.63
   2  -6  17   17.20    8.07
  -2   6 -17   12.96    9.30
  -2   6 -17  -10.32   13.20
  -2   6 -18   -1.34    8.57
  -2   6 -18    6.17    9.43
  -2   6 -19   29.10   15.12
  -2   6 -19   23.68   26.99
  -2   6 -20   -1.99    6.59
   2  -5 -16   -7.33    5.78
   2  -5 -15    3.63    8.44
   2  -5 -14   32.11   18.15
   2  -5 -14   32.44   26.88
   2  -5 -13   -5.40    8.25
   2  -5 -13   -4.77    8.59
  -2   5  12   24.79   14.76
   2  -5 -12   25.63   14.25
   2  -5 -12   10.07   10.43
  -2   5  11  115.14   32.10
  -2   5  11   46.78   16.99
   2  -5 -11   44.82   16.08
   2  -5 -11   62.17   20.90
  -2   5  10    8.13    8.84
  -2   5  10    3.71    2.81
   2  -5 -10   27.01   12.10
   2  -5 -10   19.89   12.85
  -2   5   9   78.49   21.58
  -2   5   9   20.48   10.77
  -2   5   9   21.54   10.92
   2  -5  -9   48.87   16.98
   2  -5  -9   25.81   13.80
  -2   5   8   26.49   12.72
  -2   5   8   -0.65    3.36
  -2   5   8   -2.73    3.33
   2  -5  -8   19.93   10.70
   2  -5  -8   19.12   10.18
  -2   5   7  110.38   29.01
  -2   5   7   57.04   15.96
   2  -5  -7   87.44   21.85
   2  -5  -7   51.51   13.98
  -2   5   6  104.25   20.80
  -2   5   6   70.69   18.07
   2  -5  -6  114.25   20.20
   2  -5  -6   92.23   16.90
  -2   5   5   57.97   16.55
   2  -5  -5   20.60    8.65
  -2   5   5   32.04    7.40
   2  -5  -5   25.03    9.39
   2  -5  -5   23.98    9.06
  -2   5   4   91.03   15.37
   2  -5  -4  107.99   15.84
  -2   5   4   76.42   16.07
  -2   5   4   92.04   14.54
   2  -5  -4  129.03   16.22
   2  -5  -4  105.92   22.20
  -2   5   3   23.09   10.52
   2  -5  -3   19.58   10.01
  -2   5   3   11.69    5.92
  -2   5   3    3.44    5.63
   2  -5  -3    5.81    4.90
   2  -5  -3   18.15    8.96
   2  -5  -3   17.12    9.64
  -2   5   2   98.04   18.32
   2  -5  -2   91.14   15.81
  -2   5   2   91.84   15.47
  -2   5   2   87.83   17.78
   2  -5  -2   99.70   16.62
   2  -5  -2  106.06   18.60
  -2   5   1   42.20   10.99
   2  -5  -1   25.41   10.44
   2  -5  -1   26.41   11.79
  -2   5   1   37.71    6.63
  -2   5   1   35.70    7.55
   2  -5  -1   19.81    7.96
  -2   5   0  361.09   56.24
   2  -5   0  418.63   33.77
   2  -5   0  392.48   14.25
  -2   5   0  383.58   12.32
  -2   5   0  396.69   23.15
   2  -5   0  388.46   12.64
  -2   5  -1 2159.27   54.24
   2  -5   1 2104.13   51.55
   2  -5   1 2183.11   54.52
  -2   5  -1 2172.57   52.40
  -2   5  -1 2187.30   53.15
   2  -5   1 2183.60   56.32
  -2   5  -2  180.84   22.39
   2  -5   2  145.10   14.77
   2  -5   2  167.15   23.24
  -2   5  -2  165.74   15.84
  -2   5  -2  138.21   19.83
   2  -5   2  166.46   16.98
   2  -5   2  182.28   18.67
  -2   5  -3    5.42    3.69
   2  -5   3    7.00    5.07
  -2   5  -3    6.30    4.09
  -2   5  -3   18.55    8.54
   2  -5   3   -6.61    5.30
  -2   5  -3   22.62   13.02
   2  -5   3    4.98    4.47
  -2   5  -4 1187.73   31.06
   2  -5   4 1239.01   32.15
  -2   5  -4 1284.03   32.37
  -2   5  -4 1253.12   31.57
   2  -5   4 1226.54   30.94
  -2   5  -4 1272.12   35.41
   2  -5   4 1229.50   31.58
  -2   5  -5   30.82   14.50
   2  -5   5   14.26    7.79
  -2   5  -5   17.99    7.44
  -2   5  -5   26.07   10.09
   2  -5   5   22.74    8.80
  -2   5  -5   29.36   12.61
   2  -5   5   30.44   14.61
   2  -5   6   33.78    8.00
  -2   5  -6   25.40    5.80
  -2   5  -6   38.70   10.32
   2  -5   6   28.76    7.91
  -2   5  -6   56.47   13.27
   2  -5   6   36.95    7.58
   2  -5   7    8.73    6.17
  -2   5  -7    9.78    6.99
  -2   5  -7   13.83    5.54
  -2   5  -7   16.22    8.26
   2  -5   7    6.67    4.26
   2  -5   8   20.49    7.82
  -2   5  -8   13.26    4.95
  -2   5  -8   25.00   10.69
  -2   5  -8   32.55   10.87
   2  -5   8   13.09    4.87
   2  -5   9   18.50    7.82
  -2   5  -9   31.42   11.84
  -2   5  -9   20.62    7.92
   2  -5   9   24.35    9.28
   2  -5  10   44.18   16.39
  -2   5 -10   68.98   17.80
  -2   5 -10   45.67   16.92
   2  -5  10   53.17   12.23
   2  -5  11   34.00   11.79
  -2   5 -11   45.73   15.63
  -2   5 -11   15.24    9.54
   2  -5  11   32.49   10.75
   2  -5  12   20.01   10.05
  -2   5 -12   13.48    8.25
  -2   5 -12   27.88   14.72
   2  -5  12   18.12   10.38
   2  -5  13   36.80   13.82
  -2   5 -13   39.24   15.52
  -2   5 -13   45.69   20.10
   2  -5  14   72.22   24.32
  -2   5 -14   62.60   21.80
  -2   5 -14  120.48   32.34
   2  -5  15   12.53    8.89
  -2   5 -15   19.89   10.96
  -2   5 -15   31.78   17.72
   2  -5  16   65.38   21.60
  -2   5 -16   48.57   25.31
  -2   5 -16   62.24   19.76
  -2   5 -17    8.35   10.09
  -2   5 -17   -0.40   13.25
  -2   5 -18   13.41   13.34
  -2   5 -18    7.86   10.00
  -2   5 -19   23.96   12.47
  -2   5 -19   52.92   24.14
  -2   5 -20    0.35    3.91
   2  -4 -17   30.92   16.24
   2  -4 -16  -10.76    8.78
   2  -4 -15   16.94   11.18
   2  -4 -14   52.99   21.25
   2  -4 -14   32.78   16.17
   2  -4 -13   -0.87    8.35
   2  -4 -13   17.55   10.19
  -2   4  12   -5.74   11.05
   2  -4 -12   26.98   13.12
   2  -4 -12    7.24    9.29
  -2   4  11  126.36  122.03
  -2   4  11   86.96   21.27
   2  -4 -11   86.91   21.03
   2  -4 -11   87.87   22.79
  -2   4  10   18.93    7.90
  -2   4  10    3.82    4.05
  -2   4  10    4.54    4.70
   2  -4 -10   -3.62    7.71
   2  -4 -10   10.41    9.30
  -2   4   9   88.52   22.44
  -2   4   9   51.21   18.95
  -2   4   9   57.46   20.66
   2  -4  -9   66.00   15.77
   2  -4  -9   72.26   21.24
  -2   4   8  459.69   71.86
  -2   4   8  468.06   23.21
  -2   4   8  458.90   22.77
   2  -4  -8  441.98   46.35
   2  -4  -8  460.92   42.08
  -2   4   7  159.29   32.26
  -2   4   7  116.89   23.56
   2  -4  -7  150.40   22.75
   2  -4  -7  131.43   23.71
  -2   4   6  246.55   42.23
   2  -4  -6  208.90   26.79
  -2   4   6  200.21   24.52
   2  -4  -6  267.87   40.42
   2  -4  -6  202.93   27.42
  -2   4   5  157.48   27.99
   2  -4  -5  141.81   17.54
  -2   4   5  120.35   14.26
   2  -4  -5  108.56   16.85
   2  -4  -5  165.60   23.79
   2  -4  -5  130.05   17.19
  -2   4   4  255.34   43.18
   2  -4  -4  259.98  157.99
  -2   4   4  232.04   17.53
  -2   4   4  266.99  164.85
   2  -4  -4  233.36   21.99
   2  -4  -4  271.52  165.49
   2  -4  -4  215.21   30.31
  -2   4   3   62.11   15.85
   2  -4  -3   65.51   12.74
  -2   4   3   70.23   13.29
  -2   4   3   75.31   16.22
   2  -4  -3   65.56   13.70
   2  -4  -3   94.08   18.58
  -2   4   2  420.82   19.71
   2  -4  -2  473.03   15.39
  -2   4   2  448.03   13.26
  -2   4   2  438.76   14.28
  -2   4   1   48.18   12.37
   2  -4  -1   82.27   12.82
   2  -4  -1   71.86   12.35
  -2   4   1   52.68   10.08
  -2   4   1   62.99   12.89
   2  -4  -1   57.89   11.06
  -2   4   0   49.36   11.19
   2  -4   0   74.04    8.66
   2  -4   0   55.38   12.94
  -2   4   0   68.64    8.16
  -2   4   0   56.17   11.24
   2  -4   0   55.09   11.07
  -2   4  -1  715.96   29.66
   2  -4   1  758.94  268.80
   2  -4   1  699.11   28.57
  -2   4  -1  736.46   29.62
  -2   4  -1  758.72  268.67
   2  -4   1  737.23   29.85
   2  -4   1  757.36  270.21
  -2   4  -2   38.94    8.45
   2  -4   2   30.75    6.65
   2  -4   2   30.82    6.82
  -2   4  -2   35.62    7.13
  -2   4  -2   31.92    7.17
   2  -4   2   22.70    5.09
   2  -4   2   41.45    8.37
  -2   4  -3   31.43    7.96
   2  -4   3   29.62    7.18
  -2   4  -3   22.31    5.00
  -2   4  -3   32.13    7.75
  -2   4  -3   39.68    9.36
  -2   4  -4  648.49   19.03
   2  -4   4  687.16   23.41
  -2   4  -4  682.73   19.41
  -2   4  -4  667.86   18.25
   2  -4   4  697.40   18.87
  -2   4  -4  668.70   36.63
   2  -4   4  698.29   19.86
   2  -4   5  195.50   23.57
  -2   4  -5  168.79   15.69
  -2   4  -5  195.26   10.70
   2  -4   5  177.79   20.85
  -2   4  -5  193.02   26.54
   2  -4   5  160.63   19.40
   2  -4   6   55.68   11.99
  -2   4  -6   51.78    9.10
  -2   4  -6   65.41   13.14
  -2   4  -6   69.16   12.92
   2  -4   6   48.07    9.31
   2  -4   7  321.92   15.09
  -2   4  -7  306.12   25.69
  -2   4  -7  289.10   10.82
  -2   4  -7  341.12   37.24
   2  -4   7  238.06   30.67
   2  -4   7  307.36   16.07
   2  -4   8   -4.61    5.83
  -2   4  -8    9.75    7.22
  -2   4  -8   -3.15    5.46
  -2   4  -8    9.47    6.36
   2  -4   8    6.06    4.20
   2  -4   9   73.76   18.49
  -2   4  -9   35.45   12.05
  -2   4  -9   45.19   12.81
  -2   4  -9   56.96   15.08
   2  -4   9   50.79   12.83
   2  -4  10   26.84   10.00
  -2   4 -10   11.98    7.77
  -2   4 -10   15.62    9.89
   2  -4  10    8.56    3.47
   2  -4  11  404.32   39.74
  -2   4 -11  399.71   42.81
  -2   4 -11  384.42   64.75
   2  -4  11  318.74   19.15
   2  -4  12   -5.55    6.38
  -2   4 -12   -1.17    5.27
  -2   4 -12   -4.09    9.67
   2  -4  12    0.83    1.83
   2  -4  13   44.88   16.92
  -2   4 -13   73.96   18.47
  -2   4 -13   38.43   15.38
   2  -4  14   16.94   10.47
  -2   4 -14   11.38    8.37
  -2   4 -14  -14.07   10.92
   2  -4  15   23.48   13.97
  -2   4 -15   18.22   10.20
  -2   4 -15   28.15   15.87
   2  -4  16   29.28   15.33
  -2   4 -16   25.74   14.93
  -2   4 -16   15.30   13.71
  -2   4 -17   15.06   12.78
  -2   4 -17   34.95   16.88
  -2   4 -18   25.41   15.72
  -2   4 -18   15.97   14.41
  -2   4 -19   13.05   12.08
  -2   4 -19   -0.31   10.32
  -2   4 -20   16.98    9.93
   2  -3 -17   -0.17    9.31
   2  -3 -16   91.99   32.12
   2  -3 -15   -4.38    9.92
   2  -3 -14   21.04   14.55
   2  -3 -14   28.27   14.16
   2  -3 -13   26.07   13.20
   2  -3 -13   19.83   13.75
   2  -3 -12  -13.76    8.92
   2  -3 -12   16.33   11.48
  -2   3  11  101.18   27.57
  -2   3  11   52.55   18.18
  -2   3  11   43.37   15.64
   2  -3 -11   69.81   24.82
   2  -3 -11   54.32   19.31
  -2   3  10  312.86   43.60
  -2   3  10  344.78   21.67
  -2   3  10  303.96   19.14
   2  -3 -10  319.77   37.86
   2  -3 -10  323.71   35.60
  -2   3   9  226.97   26.99
  -2   3   9  214.46   45.14
  -2   3   9  211.60   45.29
   2  -3  -9  217.76  178.67
   2  -3  -9  206.08   48.05
  -2   3   8    8.25    9.65
  -2   3   8    2.13    1.87
  -2   3   8    1.52    1.54
   2  -3  -8   14.94    5.88
   2  -3  -8    8.44    6.14
  -2   3   7   41.95   10.66
  -2   3   7   36.32    8.04
  -2   3   7   35.58    8.23
   2  -3  -7   22.86   10.25
   2  -3  -7   41.44   11.09
  -2   3   6  130.54   19.88
   2  -3  -6  122.09   15.30
  -2   3   6  147.44   10.83
   2  -3  -6  163.95   18.87
   2  -3  -6  134.72   16.96
  -2   3   5    6.62    7.04
   2  -3  -5   29.18    8.20
  -2   3   5   16.37    7.47
   2  -3  -5    8.36    5.12
   2  -3  -5   13.38    6.91
   2  -3  -5    4.72    4.50
  -2   3   4  203.80   36.53
   2  -3  -4  168.03   25.22
  -2   3   4  184.47   13.23
   2  -3  -4  165.48   20.11
   2  -3  -4  200.44   23.26
   2  -3  -4  220.47   29.37
  -2   3   3  417.21   59.74
   2  -3  -3  402.34   41.15
  -2   3   3  395.83   16.22
  -2   3   3  362.35   17.17
   2  -3  -3  381.78   17.77
  -2   3   2  540.88   25.52
   2  -3  -2  581.00   29.05
   2  -3  -2  534.23   21.59
  -2   3   2  537.36   22.05
  -2   3   2  516.77   25.90
   2  -3  -2  512.08   22.44
  -2   3   1 2991.55   46.35
   2  -3  -1 2921.90   44.56
   2  -3  -1 2962.39   43.02
  -2   3   1 2858.79   42.41
  -2   3   1 2848.95   42.14
   2  -3  -1 2997.40   43.34
  -2   3   0  707.44   29.91
   2  -3   0  693.85   28.92
   2  -3   0  663.70   26.74
  -2   3   0  655.01   27.97
  -2   3   0  679.69   31.85
   2  -3   0  681.56   27.29
  -2   3  -1  509.96   21.92
   2  -3   1  585.07   24.32
   2  -3   1  539.01   22.23
  -2   3  -1  550.74   22.91
  -2   3  -1  540.86   22.12
   2  -3   1  566.04   22.70
   2  -3   1  537.63   23.69
  -2   3  -2   38.14    7.55
   2  -3   2   36.83    8.28
   2  -3   2   13.59    7.92
  -2   3  -2   28.97    6.88
  -2   3  -2   29.12    6.27
   2  -3   2   31.49    6.17
   2  -3   2   39.16    8.15
  -2   3  -3 4329.01   63.15
   2  -3   3 4302.34   61.40
  -2   3  -3 4407.24   62.67
  -2   3  -3 4391.60   62.65
   2  -3   3 4378.08   61.66
  -2   3  -3 4239.08   61.78
   2  -3   3 4403.35   62.95
   2  -3   4  696.35   29.43
  -2   3  -4  717.84   29.00
  -2   3  -4  752.86  266.68
   2  -3   4  740.57  262.22
  -2   3  -4  712.37   36.62
   2  -3   4  727.94   29.52
   2  -3   5    5.89    4.58
  -2   3  -5   -3.93    5.25
  -2   3  -5   10.95    5.04
  -2   3  -5   12.78    6.64
   2  -3   5    6.88    3.22
   2  -3   6  499.97   16.59
  -2   3  -6  538.71   16.08
  -2   3  -6  484.27   14.38
  -2   3  -6  502.33   17.53
   2  -3   6  532.03   15.77
   2  -3   6  545.29   18.45
   2  -3   7  131.59   18.71
  -2   3  -7  131.28   14.31
  -2   3  -7  143.92   18.91
  -2   3  -7  125.03   18.81
   2  -3   7  121.21   14.59
   2  -3   7  157.01   19.03
   2  -3   8   30.53    7.58
  -2   3  -8   12.41    4.55
  -2   3  -8   19.32    7.00
  -2   3  -8   32.67   10.59
   2  -3   8   23.09    8.43
   2  -3   9  283.80   99.29
  -2   3  -9  250.64   27.71
  -2   3  -9  291.05   96.68
  -2   3  -9  260.77   37.59
   2  -3   9  234.99   28.08
   2  -3  10  111.17   25.44
  -2   3 -10   84.63   19.80
  -2   3 -10   99.59   23.40
   2  -3  10   81.32   19.62
   2  -3  11   -8.58    5.27
  -2   3 -11   14.93   10.40
  -2   3 -11   31.05   27.25
   2  -3  11    3.08    2.83
   2  -3  12  337.86   39.03
  -2   3 -12  338.57   37.87
  -2   3 -12  278.89   33.84
   2  -3  12  312.86   22.01
   2  -3  13   19.66   11.99
  -2   3 -13    2.69    4.09
  -2   3 -13   -7.95    9.34
   2  -3  14   22.52   16.30
  -2   3 -14   10.63    8.60
  -2   3 -14   17.30   12.36
   2  -3  15   60.45   20.14
  -2   3 -15   61.81   23.24
  -2   3 -15   79.83   27.41
   2  -3  16   14.48   11.68
  -2   3 -16   24.50   17.03
  -2   3 -16   11.73   10.67
  -2   3 -17   52.08   24.95
  -2   3 -17   31.71   15.91
  -2   3 -18   -2.64    6.97
  -2   3 -18   17.75   18.98
  -2   3 -19   -7.99    5.53
   2  -2 -18   -3.19    8.41
   2  -2 -17   27.53   17.17
   2  -2 -16   54.95   31.86
   2  -2 -15   15.00   11.28
   2  -2 -14    8.72    9.17
   2  -2 -14    3.81    4.79
   2  -2 -13   96.30   27.24
   2  -2 -13   61.38   20.80
   2  -2 -12   55.21   23.51
   2  -2 -12   25.06   12.33
  -2   2  11  350.71   50.93
   2  -2 -11  287.83   42.33
   2  -2 -11  259.79   46.33
  -2   2  10  245.15   33.86
  -2   2  10  159.71   33.55
  -2   2  10  144.46   30.37
   2  -2 -10  179.25   40.94
   2  -2 -10  155.89   37.52
  -2   2   9   -3.93   10.20
  -2   2   9    2.27    0.94
  -2   2   9    1.77    0.87
   2  -2  -9   -3.78    6.94
   2  -2  -9    2.71    3.59
  -2   2   8   95.98   21.51
  -2   2   8   91.18   15.49
  -2   2   8  104.04   16.29
   2  -2  -8  110.47   21.41
   2  -2  -8  124.93   22.45
  -2   2   7   71.57   17.33
   2  -2  -7   42.61   10.85
  -2   2   7   38.86    8.48
  -2   2   7   36.05    7.76
   2  -2  -7   37.63    9.57
   2  -2  -7   34.71    8.91
   2  -2  -6   40.59   13.12
  -2   2   6   31.14    6.89
  -2   2   6   23.77    5.12
   2  -2  -6   27.04    6.23
   2  -2  -6   25.09    8.79
   2  -2  -6   29.91    8.10
  -2   2   5  461.37   57.38
   2  -2  -5  438.90   18.91
  -2   2   5  436.62   10.97
   2  -2  -5  463.00   38.58
   2  -2  -5  422.84   14.37
   2  -2  -5  443.86   13.18
  -2   2   4   71.27   12.16
   2  -2  -4   58.46   12.34
  -2   2   4   44.89    8.63
   2  -2  -4   41.27    9.20
   2  -2  -4   49.31   10.73
  -2   2   3  582.91   27.40
   2  -2  -3  622.25   27.52
  -2   2   3  577.59   22.59
   2  -2  -3  610.42   25.06
  -2   2   2  368.42   18.95
   2  -2  -2  368.74   21.62
   2  -2  -2  375.87   19.04
  -2   2   2  353.85   14.42
  -2   2   2  337.14   15.09
   2  -2  -2  384.22   16.45
  -2   2   1 1176.39   22.33
   2  -2  -1 1176.91   21.01
   2  -2  -1 1162.59   18.69
  -2   2   1 1142.14   17.22
  -2   2   1 1171.21   18.73
   2  -2  -1 1160.07   18.45
  -2   2   0 6358.27 2250.53
   2  -2   0 6158.51   93.08
   2  -2   0 6067.41   84.75
  -2   2   0 6198.14 2193.68
  -2   2   0 6164.39   85.86
   2  -2   0 6305.03 2231.50
  -2   2  -1   95.39   14.75
   2  -2   1  106.27   13.86
   2  -2   1   87.18   14.06
  -2   2  -1   95.34   13.04
  -2   2  -1   93.95   13.78
   2  -2   1   99.79   13.80
   2  -2   1   98.65   12.13
  -2   2  -2 1802.83   27.40
   2  -2   2 1818.79   27.27
  -2   2  -2 1844.98   27.38
  -2   2  -2 1884.66   27.68
   2  -2   2 1878.12   27.17
  -2   2  -2 1853.26   39.88
   2  -2   2 1915.35   30.29
  -2   2  -3   72.73   10.89
   2  -2   3   52.03   11.28
  -2   2  -3   54.92   10.77
  -2   2  -3   69.14   10.46
   2  -2   3   69.28    8.95
  -2   2  -3   81.43   13.52
   2  -2   3   66.73   24.86
   2  -2   4 1119.49   23.55
  -2   2  -4 1053.77   19.73
   2  -2   4 1125.74   27.24
   2  -2   5  527.50   15.07
  -2   2  -5  533.86   15.25
  -2   2  -5  512.87   20.87
  -2   2  -5  567.28   38.96
   2  -2   5  550.13   15.73
   2  -2   5  560.03   35.79
   2  -2   6    1.53    2.27
  -2   2  -6   13.47    5.71
  -2   2  -6    8.64    4.50
  -2   2  -6    8.11    5.02
   2  -2   6    7.99    3.46
   2  -2   6   20.08    7.78
   2  -2   7  134.28   19.54
  -2   2  -7  116.91   12.83
  -2   2  -7  132.38   16.58
  -2   2  -7  124.25   16.06
   2  -2   7   94.81   14.53
   2  -2   7  110.70   14.88
   2  -2   8  140.52   24.58
  -2   2  -8   96.85   17.25
  -2   2  -8  148.19   26.85
  -2   2  -8   94.31   17.32
   2  -2   8  121.28   22.27
   2  -2   9   14.81    5.42
  -2   2  -9   27.78    9.34
  -2   2  -9   36.27   13.57
   2  -2   9   22.35    7.82
   2  -2  10   27.19   10.75
  -2   2 -10   29.38   12.39
   2  -2  10   24.71    9.07
   2  -2  11   -5.31    5.60
  -2   2 -11   23.44   11.30
   2  -2  11    4.59    3.92
   2  -2  12   13.44    8.57
  -2   2 -12   -0.24    7.81
  -2   2 -12    9.34    7.97
   2  -2  12    5.19    3.79
   2  -2  13   14.69   11.71
  -2   2 -13   16.83   12.04
  -2   2 -13   13.57   11.04
   2  -2  14    7.37    8.78
  -2   2 -14   13.79    9.61
  -2   2 -14   -2.85    6.88
   2  -2  15  166.26   32.55
  -2   2 -15  122.17   28.91
  -2   2 -15  170.61   37.48
   2  -2  16   12.91    9.96
  -2   2 -16   15.95   17.53
  -2   2 -16   23.65   17.96
  -2   2 -17   18.75   12.09
  -2   2 -17    4.77    9.71
  -2   2 -18   -1.68    6.88
  -2   2 -18    9.69   10.74
  -2   2 -19    4.24    5.28
   2  -1 -18   27.18   15.37
   2  -1 -17   14.99   15.66
   2  -1 -16   13.79   11.59
   2  -1 -15   -4.07    8.27
   2  -1 -14   16.91   12.20
   2  -1 -14    8.63    6.89
   2  -1 -13   -0.14    8.39
   2  -1 -13    9.50    6.89
   2  -1 -12  117.61   26.98
   2  -1 -12   80.33   29.47
   2  -1 -11   38.43   16.34
   2  -1 -11   48.35   17.63
  -2   1  10   12.37   11.64
   2  -1 -10   21.43    9.56
   2  -1 -10    7.16    6.82
  -2   1   9   -8.82   10.28
   2  -1  -9    1.58    4.11
   2  -1  -9   -2.18    4.99
  -2   1   8  858.68   37.81
   2  -1  -8  920.38   38.68
   2  -1  -8  939.44   37.99
  -2   1   7  257.02   43.69
   2  -1  -7  227.75   33.42
   2  -1  -7  250.19   36.12
   2  -1  -7  260.83  158.51
  -2   1   6  464.72   20.79
   2  -1  -6  434.57   24.23
   2  -1  -6  511.72   28.98
   2  -1  -6  491.19   14.04
  -2   1   5  568.91   36.11
   2  -1  -5  514.76   39.40
   2  -1  -5  526.14   17.87
  -2   1   4  112.71   16.67
   2  -1  -4  162.95   21.80
   2  -1  -4  139.11   20.91
  -2   1   3   33.05   11.34
   2  -1  -3   55.97   13.93
   2  -1  -3   42.23    8.75
  -2   1   3   46.36    8.30
  -2   1   2  936.78   20.53
   2  -1  -2  944.19   19.78
   2  -1  -2  958.51   14.18
  -2   1   2  951.92   13.72
   2  -1  -2  949.41   15.42
  -2   1   1  201.78   36.26
   2  -1  -1  234.19   26.51
   2  -1  -1  198.55   13.51
  -2   1   1  205.35   13.62
   2  -1  -1  209.46   14.63
  -2   1   0  578.06   24.52
   2  -1   0  582.29   23.82
   2  -1   0  576.93   22.89
  -2   1   0  567.47   22.31
  -2   1   0  585.41   24.03
   2  -1   0  572.35   22.37
  -2   1  -1  170.43   12.54
   2  -1   1  178.39   12.45
   2  -1   1  184.39   12.97
  -2   1  -1  153.77   10.77
  -2   1  -1  173.94   12.43
   2  -1   1  180.89   12.02
  -2   1  -1  191.18   32.12
   2  -1   1  192.99   27.17
  -2   1  -2  116.79   15.92
   2  -1   2   88.86   11.49
  -2   1  -2  115.54   15.09
  -2   1  -2   88.28    6.35
  -2   1  -2  115.61   15.31
   2  -1   2  112.84   15.14
   2  -1   2  123.47   18.43
   2  -1   3 1462.35   22.53
  -2   1  -3 1507.99   30.66
  -2   1  -3 1437.30   20.91
  -2   1  -3 1423.45   23.80
   2  -1   3 1492.34   23.76
   2  -1   3 1456.62   25.88
   2  -1   4   69.82   11.62
  -2   1  -4   75.69    8.96
  -2   1  -4   72.61   10.41
   2  -1   4   59.94   10.84
   2  -1   4   72.30   11.01
   2  -1   5   61.69   11.62
  -2   1  -5   69.85   11.55
  -2   1  -5   75.39   14.22
   2  -1   5   67.88   11.93
  -2   1  -5   51.87   12.60
   2  -1   5   82.27   14.94
   2  -1   6   31.00   14.59
  -2   1  -6   36.99    6.53
  -2   1  -6   38.22    7.72
   2  -1   6   22.67    9.14
  -2   1  -6   11.38    6.39
   2  -1   6   28.79   11.17
   2  -1   7  341.86   14.86
  -2   1  -7  335.69   10.98
  -2   1  -7  346.51   24.28
   2  -1   7  350.37   12.62
  -2   1  -7  364.52   27.93
   2  -1   7  371.61   12.41
  -2   1  -8   18.02    7.58
   2  -1   8   13.38    5.44
  -2   1  -8   12.10    4.71
  -2   1  -8   21.06    8.10
  -2   1  -8   12.71    6.14
   2  -1   8   22.63    8.61
  -2   1  -9   38.15   11.76
   2  -1   9   74.75   18.96
  -2   1  -9   46.55   12.06
  -2   1  -9   49.69   13.96
  -2   1  -9   84.19   19.34
   2  -1   9   62.46   15.04
   2  -1  10  514.89   33.16
  -2   1 -10  490.92   57.30
  -2   1 -10  475.04   49.03
   2  -1  10  479.37   23.84
   2  -1  11   -0.08    5.39
  -2   1 -11   -2.48    9.50
   2  -1  11    1.97    1.87
   2  -1  12   14.35    8.58
  -2   1 -12    8.14    8.31
   2  -1  12    1.40    2.07
   2  -1  13   -2.00    5.75
  -2   1 -13  -14.03    9.96
   2  -1  14   14.10   10.68
  -2   1 -14   22.54   15.61
   2  -1  15   28.74   13.21
  -2   1 -15   34.59   16.00
  -2   1 -16   35.22   17.49
  -2   1 -16    9.08   10.00
  -2   1 -17   13.16   10.72
  -2   1 -17   46.23   17.40
  -2   1 -18   13.37    5.53
  -2   1 -18   19.49   14.58
  -2   1 -19   16.43    9.99
   2   0 -18   28.61   17.60
   2   0 -17   -3.86    9.21
   2   0 -16    6.48    8.00
   2   0 -15   -3.54    8.95
   2   0 -14   -2.29   10.01
   2   0 -13   -3.30    7.66
   2   0 -13    9.01    6.95
   2   0 -12   76.58   27.19
   2   0 -12   40.13   16.34
   2   0 -11   19.19    9.05
   2   0 -11    6.92    5.84
   2   0 -10   74.28   19.16
   2   0 -10   74.14   20.43
  -2   0   9   39.81   10.66
   2   0  -9   20.28    7.44
   2   0  -9   30.43   10.87
  -2   0   8  133.20   31.82
   2   0  -8  162.92   24.49
   2   0  -8  167.71   24.00
  -2   0   7  277.51   40.15
   2   0  -7  258.22   31.93
   2   0  -7  279.96   31.38
  -2   0   7  229.81   23.58
   2   0  -7  280.57    9.67
  -2   0   6  815.59   26.76
   2   0  -6  824.22   28.03
  -2   0   5 2095.64   36.69
   2   0  -5 2120.34   36.85
   2   0  -5 2178.09   34.50
  -2   0   4  861.93   32.56
   2   0  -4  839.24   19.33
   2   0  -4  816.43   14.70
  -2   0   3   58.21   15.26
   2   0  -3   83.50   13.86
   2   0  -3   65.59   10.25
  -2   0   2  513.62   23.26
   2   0  -2  549.07   24.06
   2   0  -2  529.99   20.75
  -2   0   2  517.18   20.14
  -2   0   1   64.91   13.64
   2   0  -1   58.95   11.79
   2   0  -1   68.58   10.74
  -2   0   1   52.64   10.18
  -2   0   0 1384.46   22.07
   2   0   0 1367.81   21.09
   2   0   0 1307.74   19.42
  -2   0   0 1347.35   20.03
   2   0   0 1288.75   21.96
  -2   0  -1  586.51   23.66
   2   0   1  589.59   23.37
   2   0   1  550.66   21.92
  -2   0  -1  547.90   23.41
   2   0   1  602.90   25.34
  -2   0  -1  551.74   24.57
   2   0   1  565.88   24.42
  -2   0  -2   57.54   11.92
   2   0   2   61.97   13.27
  -2   0  -2   58.93   11.92
  -2   0  -2   62.21   12.53
   2   0   2   52.77   10.41
  -2   0  -2   52.82   14.26
   2   0   2   70.47   11.15
   2   0   3   44.35    8.86
  -2   0  -3   28.53    6.83
  -2   0  -3   25.57    6.26
   2   0   3   33.98    7.84
  -2   0  -3   27.36    9.55
   2   0   3   44.70    9.37
   2   0   4  171.74   22.31
  -2   0  -4  198.03   22.36
  -2   0  -4  163.05   21.33
   2   0   4  192.58   21.18
  -2   0  -4  181.89   34.15
   2   0   4  209.65   26.38
   2   0   5   79.98   15.68
  -2   0  -5   99.77   16.61
  -2   0  -5   81.09   14.00
   2   0   5   63.66   14.41
  -2   0  -5   98.07   19.03
   2   0   5   91.02   14.08
  -2   0  -6  856.30   27.03
   2   0   6  802.13   24.47
  -2   0  -6  783.51   24.08
  -2   0  -6  791.15   25.10
   2   0   6  794.67   24.22
  -2   0  -6  765.78   26.84
   2   0   6  819.33   25.15
  -2   0  -7    8.85    6.39
   2   0   7   -1.92    4.43
  -2   0  -7    5.18    4.48
  -2   0  -7    4.53    4.89
   2   0   7    6.97    5.07
  -2   0  -7   15.88    9.16
   2   0   7    7.68    5.01
  -2   0  -8   23.77    7.82
   2   0   8   28.25    9.82
  -2   0  -8   22.08    8.22
  -2   0  -8   23.93    9.07
  -2   0  -8   48.72   14.12
   2   0   8   32.01   10.81
  -2   0  -9    8.06    6.46
   2   0   9    9.73    5.92
  -2   0  -9    4.71    2.04
  -2   0  -9   33.43   12.97
  -2   0  -9   -5.65    9.83
   2   0   9   10.44    5.83
   2   0  10  181.95   41.93
  -2   0 -10  232.25   22.85
  -2   0 -10  191.12   46.86
   2   0  10  131.41   32.49
   2   0  11  127.46   30.54
  -2   0 -11  113.54   31.50
  -2   0 -11  111.78   31.86
   2   0  11   64.90   22.78
   2   0  12   19.41   11.85
  -2   0 -12   16.36   10.25
  -2   0 -12   30.63   14.37
   2   0  13   26.93   12.16
  -2   0 -13   63.20   24.96
  -2   0 -13   21.72   13.56
   2   0  14   31.76   16.90
  -2   0 -14   36.04   19.72
   2   0  15   12.19   12.75
  -2   0 -15   27.74   15.40
  -2   0 -16   22.54   17.49
  -2   0 -17    8.24    9.94
  -2   0 -17   28.48   25.31
  -2   0 -18   20.53   11.23
  -2   0 -19   -8.50    4.90
   2   1 -19   -4.98    8.12
   2   1 -19    2.95    6.27
   2   1 -18    6.17    7.60
   2   1 -17   53.47   22.53
   2   1 -16   -1.14    9.94
   2   1 -15    9.98   10.04
   2   1 -14   38.96   14.45
   2   1 -13    8.06    6.78
   2   1 -13    8.50    6.12
   2   1 -12    8.76    7.06
   2   1 -12   -1.33    2.75
   2   1 -11  225.47   10.32
   2   1 -10   82.30   21.44
   2   1 -10   51.21   13.28
   2   1  -9   59.36   14.44
   2   1  -9   62.30   17.04
   2   1  -8   66.67   13.59
   2   1  -8   72.71   40.70
   2   1  -8   78.53   15.60
  -2  -1   7   -2.19   14.04
   2   1  -7   21.17   15.11
   2   1  -7   17.86    8.25
   2   1  -7   35.35    8.83
  -2  -1   7   13.45    7.34
   2   1  -7   26.70    5.74
  -2  -1   6   -6.72   12.11
   2   1  -6   13.60    7.90
   2   1  -6    1.85    1.07
   2   1  -6  -10.75    7.72
  -2  -1   6   15.93    7.50
  -2  -1   5  599.58   26.68
   2   1  -5  693.32   30.89
   2   1  -5  632.44   24.58
   2   1  -5  633.60   26.42
  -2  -1   5  584.52   24.02
  -2  -1   4 2726.92   42.52
   2   1  -4 2912.49   47.18
   2   1  -4 2834.62   39.86
   2   1  -4 2832.71   42.19
  -2  -1   3 1120.89   21.27
   2   1  -3 1110.75   17.86
   2   1  -3 1104.77   19.23
  -2  -1   2 2571.55   39.21
   2   1  -2 2576.87   39.86
   2   1  -2 2555.75   38.17
  -2  -1   1 1472.31   23.71
   2   1  -1 1405.76   23.16
   2   1  -1 1399.84   20.75
   2   1  -1 1399.59   20.21
  -2  -1   1 1409.82   24.20
   2   1  -1 1417.86   23.60
  -2  -1   0 4246.80   62.13
   2   1   0 4364.29   62.15
   2   1   0 4322.79   60.61
   2   1   0 4403.56   60.87
  -2  -1   0 4484.05   61.92
   2   1   0 4274.90   61.00
  -2  -1   0 4472.36   65.12
   2   1   0 4366.98   62.80
  -2  -1  -1 2139.50   30.70
   2   1   1 2091.89   30.48
   2   1   1 2143.59   30.05
  -2  -1  -1 2226.58   31.18
  -2  -1  -1 2156.88   32.76
   2   1   1 2211.25   32.62
  -2  -1  -1 2122.00   41.12
   2   1   1 2188.69   33.93
   2   1   2 1853.04   27.18
  -2  -1  -2 1816.66   26.90
  -2  -1  -2 1865.65   26.75
  -2  -1  -2 1826.13   28.02
   2   1   2 1884.33   27.94
  -2  -1  -2 1886.21   31.00
   2   1   3  787.42   13.51
  -2  -1  -3  789.24   23.10
  -2  -1  -3  831.71   20.80
  -2  -1  -3  783.64   14.53
   2   1   3  796.94   14.01
  -2  -1  -3  776.87   18.25
   2   1   3  814.78   15.32
  -2  -1  -4 1769.37   43.69
   2   1   4 1709.53   41.31
  -2  -1  -4 1733.35   42.23
  -2  -1  -4 1761.69   44.00
  -2  -1  -4 1704.15   42.00
   2   1   4 1753.92   42.75
  -2  -1  -4 1771.83   46.69
   2   1   4 1823.29   44.90
  -2  -1  -5   23.56    8.90
   2   1   5   20.80    8.42
  -2  -1  -5   18.90    7.65
  -2  -1  -5   24.08    9.18
  -2  -1  -5   22.63    9.61
   2   1   5   27.10   10.18
  -2  -1  -5   26.87   12.81
   2   1   5   26.78   10.46
  -2  -1  -6  528.31   18.99
   2   1   6  455.27   20.72
  -2  -1  -6  489.90   21.17
  -2  -1  -6  472.18   17.23
   2   1   6  505.58   16.64
   2   1   6  517.44   16.87
  -2  -1  -7   15.98    6.25
   2   1   7   13.71    5.76
  -2  -1  -7   11.65    5.81
  -2  -1  -7    8.23    7.16
   2   1   7   10.32    6.96
  -2  -1  -7   12.58    7.80
   2   1   7    4.81    3.77
  -2  -1  -8    8.77    5.46
   2   1   8    7.62    4.46
  -2  -1  -8   12.23    8.66
  -2  -1  -8   32.79   12.40
  -2  -1  -8   -7.48   11.88
   2   1   8    8.97    6.97
  -2  -1  -9   16.60    9.63
   2   1   9   11.60    6.85
  -2  -1  -9   -0.70    7.19
  -2  -1  -9   12.19    8.56
   2   1   9   -4.65    3.56
   2   1  10    4.23    4.13
  -2  -1 -10   37.35   13.81
  -2  -1 -10   14.91    9.52
   2   1  10    5.61    4.47
   2   1  11  147.79   33.39
  -2  -1 -11  152.98   38.73
  -2  -1 -11  156.95   20.41
   2   1  12  202.59   15.12
  -2  -1 -12  153.84   18.17
  -2  -1 -12  142.02   18.30
   2   1  13    3.38    4.60
  -2  -1 -13   -1.61    9.88
  -2  -1 -13   24.53   15.31
   2   1  14   60.80   24.70
  -2  -1 -14   70.44   30.26
  -2  -1 -14   36.10   16.63
  -2  -1 -15   -8.49   11.50
  -2  -1 -16   51.86   25.55
  -2  -1 -17   12.32    7.31
  -2  -1 -18    6.62    7.71
   2   2 -19   23.14   13.18
   2   2 -19   -9.63    9.17
   2   2 -18   -1.26    5.99
   2   2 -18   10.97    9.93
   2   2 -17   22.14   13.84
   2   2 -16    4.73    8.26
   2   2 -15  -11.60   10.28
   2   2 -14   16.91   11.14
   2   2 -13   13.52    8.84
   2   2 -12   21.95   11.41
   2   2 -11   94.68   20.82
   2   2 -11  134.01   32.07
   2   2 -10  127.87   19.63
   2   2 -10  129.89   24.38
   2   2  -9  191.97   16.86
   2   2  -9  196.64   26.13
   2   2  -8   18.84    8.92
   2   2  -8   26.60    6.82
  -2  -2   8   25.73    5.54
   2   2  -8   22.46    5.72
   2   2  -8   18.75    8.64
   2   2  -7   11.68    8.91
   2   2  -7   -5.51    2.50
   2   2  -7    5.83    4.67
  -2  -2   7   -5.31    5.61
   2   2  -7    6.67    3.25
   2   2  -7    0.16    1.17
   2   2  -6   21.05   10.32
   2   2  -6    2.50    1.80
   2   2  -6   -2.48    7.53
  -2  -2   6    1.96    2.63
   2   2  -6    1.08    1.76
   2   2  -5  216.71   37.32
   2   2  -5  217.31   15.36
   2   2  -5  261.49   30.75
  -2  -2   5  247.77   23.89
   2   2  -5  228.61   81.12
  -2  -2   4   17.00    8.37
   2   2  -4    6.87    7.82
   2   2  -4   -0.41    5.25
   2   2  -4   -1.52    5.26
  -2  -2   3   75.24   12.79
   2   2  -3   60.52   12.60
   2   2  -3   68.02   10.53
   2   2  -3   69.05   11.02
  -2  -2   3   63.70   14.49
   2   2  -3   64.84   13.52
  -2  -2   2 1742.39   25.44
  -2  -2   2 1695.63   28.41
   2   2  -2 1773.00   27.01
   2   2  -1    9.05    4.80
   2   2  -1    3.89    1.83
  -2  -2   1    7.58    2.78
  -2  -2   1   35.79   12.13
   2   2  -1    4.01    4.82
   2   2   0   75.80    6.87
   2   2   0   72.50   11.50
  -2  -2   0   82.27   10.46
   2   2   0   95.31   12.04
  -2  -2   0   84.66   14.70
   2   2   0   71.23   12.64
   2   2   1   -3.84    4.31
  -2  -2  -1    6.74    2.14
  -2  -2  -1   -0.66    5.39
   2   2   1    6.69    2.26
  -2  -2  -1   17.67    6.78
   2   2   2  348.28   15.21
   2   2   2  345.54   15.86
  -2  -2  -2  353.90   18.28
  -2  -2  -2  338.25   15.62
   2   2   2  369.65   15.10
  -2  -2  -2  337.03   17.84
   2   2   2  336.08   15.31
  -2  -2  -3   90.08   14.11
   2   2   3   80.15   12.11
  -2  -2  -3   82.85   11.99
  -2  -2  -3   92.37   12.32
   2   2   3   61.39   11.80
  -2  -2  -3   54.86   14.34
   2   2   3   83.01    9.96
  -2  -2  -4   25.82   10.82
   2   2   4   18.13    7.99
  -2  -2  -4   12.26    6.51
  -2  -2  -4   17.14    6.94
   2   2   4    8.50    4.94
  -2  -2  -4   16.19    9.60
   2   2   4   10.56    5.56
  -2  -2  -5   12.91    7.10
   2   2   5    5.91    4.28
  -2  -2  -5    9.39    5.31
  -2  -2  -5   13.44    6.72
   2   2   5   11.47    5.57
  -2  -2  -5   13.71    8.89
   2   2   5    4.11    3.51
  -2  -2  -6   99.82   19.00
   2   2   6  165.69   22.67
  -2  -2  -6  117.78   22.00
  -2  -2  -6  120.58   22.96
   2   2   6  113.09   20.74
  -2  -2  -6  119.12   23.80
   2   2   6   97.74   16.32
  -2  -2  -7   58.65   16.88
   2   2   7   33.37   11.27
  -2  -2  -7   28.36    9.86
  -2  -2  -7   34.07   14.43
  -2  -2  -7   43.01   13.09
   2   2   7   30.66   10.54
  -2  -2  -8   14.48    9.39
   2   2   8   10.70    6.37
  -2  -2  -8   29.29   12.29
  -2  -2  -8   28.32   13.89
   2   2   8   11.72    6.60
  -2  -2  -9   47.66   16.50
   2   2   9   33.77   12.04
  -2  -2  -9   21.40   10.17
  -2  -2  -9    8.03   10.49
   2   2  10   15.65    8.48
  -2  -2 -10   32.61   17.24
  -2  -2 -10   21.82   11.58
   2   2  11   -1.35    4.51
  -2  -2 -11    7.07    6.88
  -2  -2 -11   10.51    8.99
   2   2  12   18.88   11.72
  -2  -2 -12   20.26   11.56
  -2  -2 -12   34.34   18.05
   2   2  13   16.22   10.50
  -2  -2 -13   22.60   14.04
  -2  -2 -13   21.22   11.64
   2   2  14   49.71   23.98
  -2  -2 -14   74.40   76.31
  -2  -2 -14   63.29   20.34
  -2  -2 -15  125.78   36.29
  -2  -2 -16   13.91   12.96
  -2  -2 -17   23.13   11.93
   2   3 -19   42.39   21.62
   2   3 -19   19.72   13.75
   2   3 -18    6.23    8.81
   2   3 -18   18.64   13.03
   2   3 -17   13.99    9.45
   2   3 -17    2.15    6.92
   2   3 -16   25.48   18.08
   2   3 -16   28.65   13.64
   2   3 -15   14.03    9.98
   2   3 -15   16.92   12.35
   2   3 -14    9.15    7.43
   2   3 -13   -1.65    2.03
   2   3 -13    5.47    5.33
   2   3 -12   71.07   70.91
   2   3 -12  145.09   34.01
   2   3 -11    5.43    2.47
   2   3 -11   -0.90    8.44
   2   3 -10  174.05   20.19
   2   3 -10  147.47   27.57
   2   3  -9  511.24   20.78
   2   3  -9  526.95   24.76
   2   3  -8   14.08    6.54
   2   3  -8   21.98    8.36
  -2  -3   8   27.79    5.97
   2   3  -7 1289.39   40.73
   2   3  -7 1282.25   36.55
   2   3  -7 1263.29   40.83
   2   3  -7 1279.39   38.44
  -2  -3   7 1271.03   37.47
   2   3  -7 1343.03   37.34
   2   3  -6  208.40   31.81
   2   3  -6  262.77   14.62
   2   3  -6  257.53   28.26
   2   3  -6  245.85   11.55
  -2  -3   6  266.33   20.16
   2   3  -6  232.78    9.59
   2   3  -5   61.27   10.63
   2   3  -5   57.88    9.39
   2   3  -5   53.18   11.16
   2   3  -5   58.66   10.27
  -2  -3   5   52.95    9.28
  -2  -3   5   42.07    8.92
   2   3  -5   63.35   11.33
   2   3  -4  153.05   22.39
   2   3  -4  178.41   24.03
   2   3  -4  162.94   18.83
  -2  -3   4  182.34   16.26
   2   3  -4  176.28   20.69
   2   3  -3   12.66    7.03
  -2  -3   3    9.40    3.74
   2   3  -3    9.74    2.72
  -2  -3   3   13.72    4.69
   2   3  -3    5.90    2.96
   2   3  -2  699.89   28.01
   2   3  -2  670.01   26.67
  -2  -3   2  666.78   26.47
   2   3  -2  645.33   25.26
  -2  -3   2  672.14   28.55
   2   3  -2  672.47   27.25
   2   3  -1   14.68    3.59
   2   3  -1   18.50    4.12
  -2  -3   1   10.79    2.82
  -2  -3   1    8.58    5.73
   2   3  -1   14.52    4.13
   2   3   0  491.88   19.34
   2   3   0  477.25   19.10
   2   3   0  476.50   20.16
  -2  -3   0  478.15   19.93
   2   3   0  470.75   18.51
  -2  -3   0  477.00   22.50
   2   3   0  496.65   21.17
   2   3   1   -2.02    4.09
  -2  -3  -1    0.46    2.64
  -2  -3  -1    3.10    1.96
   2   3   1    1.29    1.91
  -2  -3  -1   -7.83   10.13
   2   3   1  -11.81    6.15
   2   3   2  349.83   32.91
  -2  -3  -2  336.47   14.30
  -2  -3  -2  326.33   15.59
   2   3   2  349.96   14.22
  -2  -3  -2  358.73   49.33
   2   3   2  349.97   39.01
  -2  -3  -3   52.97    9.87
   2   3   3   63.81   12.09
   2   3   3   77.99   12.61
  -2  -3  -3   45.76    7.93
  -2  -3  -3   61.99   11.26
   2   3   3   65.45   10.98
  -2  -3  -3   59.70   13.93
   2   3   3   50.06    9.52
  -2  -3  -4   70.47   15.93
   2   3   4   73.92   17.48
  -2  -3  -4   65.42   13.52
  -2  -3  -4   74.75   16.52
   2   3   4   77.72   16.23
  -2  -3  -4   72.72   18.30
   2   3   4   50.00   11.10
  -2  -3  -5  397.14   14.57
   2   3   5  396.09   14.06
  -2  -3  -5  426.01   14.69
  -2  -3  -5  369.23   24.37
   2   3   5  421.83   13.92
  -2  -3  -5  432.42   54.67
   2   3   5  344.21   24.55
  -2  -3  -6  666.93   33.52
   2   3   6  709.91   29.13
  -2  -3  -6  715.22   31.40
  -2  -3  -6  683.75   28.86
   2   3   6  671.05   27.55
  -2  -3  -6  666.65   30.19
   2   3   6  658.77   27.23
  -2  -3  -7   71.70   21.42
   2   3   7   92.55   18.65
  -2  -3  -7   92.49   19.01
  -2  -3  -7  115.12   22.27
  -2  -3  -7  124.39   27.02
  -2  -3  -8   75.88   19.41
   2   3   8   87.15   21.60
  -2  -3  -8   62.52   15.23
  -2  -3  -8   79.95   21.72
  -2  -3  -9  187.76   43.83
   2   3   9  305.53   33.24
  -2  -3  -9  301.98   49.89
  -2  -3  -9  273.94   35.89
   2   3  10  199.12   20.90
  -2  -3 -10  189.98   31.35
  -2  -3 -10  196.65   29.03
   2   3  11    7.36    7.27
  -2  -3 -11    8.02    8.44
  -2  -3 -11   -2.30   10.75
   2   3  12  186.88   36.18
  -2  -3 -12  190.79   28.64
  -2  -3 -12  171.76   31.20
   2   3  13   63.09   23.76
  -2  -3 -13  104.95   24.06
  -2  -3 -13   34.80   17.46
   2   3  14   22.78   13.56
  -2  -3 -14   31.39   17.96
  -2  -3 -14   15.76   11.67
  -2  -3 -15   12.27   11.24
  -2  -3 -16   17.14   13.82
  -2  -3 -17   18.47   11.84
   2   4 -19   21.08   13.82
   2   4 -19   14.94   12.57
   2   4 -18   -1.30    8.68
   2   4 -18    9.88    9.51
   2   4 -17   21.90   16.66
   2   4 -17   23.47   16.91
   2   4 -16   20.66   14.43
   2   4 -16  -12.40    9.74
   2   4 -15   25.94   13.27
   2   4 -15   40.07   15.75
   2   4 -14   33.34   15.71
   2   4 -14   40.34   14.22
   2   4 -13  103.40   24.99
   2   4 -13  118.80   28.60
   2   4 -12  102.59   28.28
   2   4 -12  142.80   36.24
   2   4 -12  121.33   28.79
   2   4 -11   14.21    8.04
   2   4 -11   24.28   11.28
   2   4 -11   18.81    8.67
   2   4 -10  344.53   22.80
   2   4 -10  326.73   39.01
   2   4 -10  296.69  219.57
   2   4  -9    5.39    3.44
   2   4  -9   20.19    7.70
   2   4  -9   -6.23    5.48
   2   4  -8    2.87    3.07
   2   4  -8   -0.31    6.36
   2   4  -8   -4.02    5.77
  -2  -4   8    6.47    5.56
   2   4  -7   15.35   11.20
   2   4  -7   26.00    5.76
   2   4  -7   34.64    9.23
   2   4  -7   37.78    8.77
  -2  -4   7   37.20    8.20
   2   4  -7   44.03    9.35
   2   4  -6  374.95   14.46
   2   4  -6  362.43   26.58
   2   4  -6  364.24   21.03
   2   4  -6  390.03   11.70
  -2  -4   6  404.95   21.57
   2   4  -6  388.88   10.31
   2   4  -5   13.00    5.90
   2   4  -5    6.42    4.33
   2   4  -5    4.17    3.99
   2   4  -5   11.70    6.01
  -2  -4   5   11.03    5.13
  -2  -4   5    8.14    3.93
   2   4  -5    8.95    3.62
   2   4  -4  340.71  153.16
  -2  -4   4  288.91   20.29
   2   4  -4  297.61   12.19
  -2  -4   4  307.27   14.62
   2   4  -4  305.73   12.76
   2   4  -3  217.83   30.54
  -2  -4   3  201.72   23.29
   2   4  -3  205.78   13.92
  -2  -4   3  231.27   27.58
   2   4  -3  233.75   26.20
   2   4  -2  151.24   25.99
  -2  -4   2  155.96   17.63
   2   4  -2  153.86   10.28
  -2  -4   2  175.50   21.36
   2   4  -2  162.06   18.56
   2   4  -1  245.01   11.46
  -2  -4   1  263.38   11.62
   2   4  -1  252.19    9.93
  -2  -4   1  289.61   33.54
   2   4  -1  265.12   13.55
   2   4   0  679.96   26.75
   2   4   0  658.64   27.91
  -2  -4   0  664.46   27.93
   2   4   0  661.16   25.56
  -2  -4   0  630.75   27.72
   2   4   0  678.81   28.34
   2   4   1  275.22   12.63
   2   4   1  267.72   11.99
  -2  -4  -1  281.26   22.00
  -2  -4  -1  301.22   15.75
   2   4   1  271.03   10.77
  -2  -4  -1  263.18   38.83
   2   4   1  259.87   29.74
   2   4   2   -1.47    2.04
  -2  -4  -2    1.20    0.93
   2   4   2    5.30    2.59
  -2  -4  -2    8.97    3.92
  -2  -4  -2    7.46    3.27
   2   4   2    3.73    2.22
  -2  -4  -2    4.57    7.43
   2   4   2    8.81    4.60
   2   4   3  218.02   16.50
  -2  -4  -3  222.50   16.18
   2   4   3  207.36   15.76
  -2  -4  -3  265.27  161.01
  -2  -4  -3  208.33   15.90
   2   4   3  219.99   15.71
  -2  -4  -3  222.31   37.77
   2   4   3  187.34   25.87
  -2  -4  -4   85.36   11.75
   2   4   4   99.43   11.20
   2   4   4  103.91   15.90
  -2  -4  -4   89.95    9.75
  -2  -4  -4  113.85   14.49
   2   4   4   87.09    8.73
  -2  -4  -4   75.16   18.26
   2   4   4   67.95   18.18
  -2  -4  -5  106.82   19.10
   2   4   5   91.85   17.43
  -2  -4  -5   93.63   16.12
  -2  -4  -5  100.08   18.80
   2   4   5   87.10   15.53
  -2  -4  -5   97.64   21.59
  -2  -4  -6  826.38   54.42
   2   4   6  797.08   52.41
  -2  -4  -6  706.69   55.28
  -2  -4  -6  821.55   53.82
   2   4   6  770.99   50.66
  -2  -4  -6  729.49   70.47
  -2  -4  -7   16.62    9.74
   2   4   7    8.14    3.92
  -2  -4  -7   14.11    8.46
  -2  -4  -7   11.09    8.12
  -2  -4  -8    4.13    3.98
   2   4   8    2.95    4.69
  -2  -4  -8   -0.16    6.88
  -2  -4  -8  -12.50   12.42
  -2  -4  -9  125.51   31.72
   2   4   9  201.46   28.66
  -2  -4  -9  180.81   29.25
  -2  -4  -9  200.71   33.42
   2   4  10   85.84   22.12
  -2  -4 -10   82.18   20.82
  -2  -4 -10   85.66   24.71
   2   4  11  196.46   35.40
  -2  -4 -11  203.83   32.68
  -2  -4 -11  155.23   25.93
   2   4  12   11.40    7.66
  -2  -4 -12   18.79   10.47
  -2  -4 -12    7.24    8.00
   2   4  13   19.45   13.39
  -2  -4 -13    4.92    6.46
  -2  -4 -13   -6.38   11.30
  -2  -4 -14   -4.25    9.41
  -2  -4 -14   -8.59    9.62
  -2  -4 -15   15.68   14.80
  -2  -4 -16    8.58    8.87
   2   5 -19   17.41   13.18
   2   5 -19   27.93   16.38
   2   5 -18   16.02   13.55
   2   5 -18    1.11    7.39
   2   5 -17   32.01   16.09
   2   5 -17   10.25    9.03
   2   5 -16    7.48    8.64
   2   5 -16   24.95   16.97
   2   5 -15   17.21   11.82
   2   5 -15   21.71   15.41
   2   5 -14   38.60   13.84
   2   5 -14   57.61   19.82
   2   5 -13    8.86    7.73
   2   5 -13   13.74    8.74
   2   5 -12    6.74    4.76
   2   5 -12   11.27    8.16
   2   5 -12   -2.57    8.02
   2   5 -11  614.64   26.27
   2   5 -11  596.33   26.68
   2   5 -11  681.91   35.74
   2   5 -10    7.80    3.28
   2   5 -10    9.93    7.33
   2   5 -10    8.21    4.16
   2   5  -9   42.48   10.78
   2   5  -9   39.07    9.72
   2   5  -9   46.27   11.37
   2   5  -8  233.40   34.99
   2   5  -8  320.23   43.96
   2   5  -8  273.20   40.51
  -2  -5   8  271.06   33.51
   2   5  -7   15.91    9.75
   2   5  -7   -1.93    4.32
   2   5  -7   -3.17    7.20
   2   5  -7    6.15    3.87
  -2  -5   7    8.12    5.13
   2   5  -7    6.58    3.58
   2   5  -6   79.60   22.15
   2   5  -6   77.26   17.19
   2   5  -6   92.57   15.40
   2   5  -6  100.13   14.99
  -2  -5   6   89.49   10.71
  -2  -5   6  108.68   16.13
   2   5  -6   72.12   17.53
   2   5  -5   27.25   10.88
   2   5  -5   48.14   10.30
  -2  -5   5   32.55    8.33
   2   5  -5   39.52    7.26
  -2  -5   5   51.58    7.90
  -2  -5   5   28.37   11.27
   2   5  -5   48.25    7.53
   2   5  -4  160.19   19.27
   2   5  -4  162.01   24.03
  -2  -5   4  171.53   18.21
   2   5  -4  196.10    8.43
  -2  -5   4  212.36   23.09
   2   5  -4  164.19   18.68
   2   5  -3   59.70   15.46
  -2  -5   3   72.85   11.81
   2   5  -3   61.86    9.32
  -2  -5   3   95.36   17.79
   2   5  -3   72.59   13.24
   2   5  -2   -9.07    6.38
  -2  -5   2   -7.82    4.58
   2   5  -2    3.30    4.53
   2   5  -1  244.33   10.47
   2   5  -1  247.99   11.84
  -2  -5   1  258.29   21.61
  -2  -5   1  255.04   32.94
   2   5  -1  221.03   25.86
   2   5   0   65.36   11.66
   2   5   0   71.57   12.50
  -2  -5   0   74.28   12.40
  -2  -5   0   95.50   21.79
   2   5   0   54.56    8.97
   2   5   1  401.18   12.29
   2   5   1  402.03   14.50
  -2  -5  -1  391.95   24.09
  -2  -5  -1  425.09   18.25
   2   5   1  401.45   10.44
  -2  -5  -1  384.17   49.64
   2   5   1  435.56   13.78
   2   5   2  181.61   17.37
   2   5   2  175.00   27.07
  -2  -5  -2  177.63   22.54
  -2  -5  -2  171.89   14.92
   2   5   2  186.94   16.15
  -2  -5  -2  163.76   24.59
   2   5   2  148.20   21.39
   2   5   3  124.90   20.05
  -2  -5  -3  134.16   20.69
   2   5   3  148.32   27.08
  -2  -5  -3  116.07   18.97
  -2  -5  -3  154.01   85.77
   2   5   3  113.61   19.89
  -2  -5  -3  107.77   20.62
   2   5   4  748.43   30.20
  -2  -5  -4  772.61   31.64
   2   5   4  720.94   39.44
  -2  -5  -4  735.97   30.99
  -2  -5  -4  751.86   30.88
   2   5   4  764.71   30.94
  -2  -5  -4  736.18   34.28
  -2  -5  -5   47.79   11.81
   2   5   5   28.73    9.88
  -2  -5  -5   40.25   10.00
  -2  -5  -5   34.21   12.14
   2   5   5   27.14   10.15
  -2  -5  -5   46.36   12.92
  -2  -5  -6   30.23   11.73
   2   5   6   27.96   10.73
  -2  -5  -6   24.16    9.42
   2   5   6   23.23    8.80
  -2  -5  -6   36.81   18.55
  -2  -5  -7 1016.87   41.80
   2   5   7  941.81   38.26
  -2  -5  -7  973.55   39.80
  -2  -5  -7  911.82   75.43
  -2  -5  -8    3.97    3.79
   2   5   8   -1.30    4.78
  -2  -5  -8   17.37    9.25
  -2  -5  -8   47.01   18.10
   2   5   9   14.74   11.06
  -2  -5  -9   20.47   12.38
  -2  -5  -9   21.90   23.21
   2   5  10   37.01   14.01
  -2  -5 -10   42.35   15.67
  -2  -5 -10   22.52   13.71
   2   5  11   41.27   18.40
  -2  -5 -11   86.32   15.46
  -2  -5 -11   39.60   15.96
   2   5  12   -3.54    4.49
  -2  -5 -12   12.10   11.13
  -2  -5 -12   -1.56   12.08
   2   5  13   12.61   10.16
  -2  -5 -13   20.63    9.22
  -2  -5 -13   27.34   17.00
  -2  -5 -14  107.34   35.38
  -2  -5 -14   37.96   16.09
  -2  -5 -15   -6.60    8.39
  -2  -5 -16   20.19   11.35
   2   6 -20   30.92   15.91
   2   6 -20   32.57   18.05
   2   6 -19   41.41   18.79
   2   6 -19  -11.36    9.09
   2   6 -18   50.45   24.45
   2   6 -18    4.96    7.92
   2   6 -17  -21.33    9.10
   2   6 -17   -4.98    9.98
   2   6 -16   -7.58    8.89
   2   6 -16   17.08   11.74
   2   6 -15   -4.22    8.75
   2   6 -15   20.63   14.17
   2   6 -14   14.78   16.93
   2   6 -14   30.67   14.37
   2   6 -13   40.93   15.11
   2   6 -13   48.86   47.14
   2   6 -12   21.85   12.06
   2   6 -12   10.18    7.82
   2   6 -11   45.18   14.92
   2   6 -11   73.56   19.08
   2   6 -11   53.08   18.37
   2   6 -10  193.71   33.69
   2   6 -10  326.27   35.27
   2   6 -10  254.87   44.26
   2   6  -9  144.82   20.63
   2   6  -9  216.81   30.46
   2   6  -9  132.53   24.43
   2   6  -8  153.14   25.97
   2   6  -8  275.07   93.80
   2   6  -8  232.57   35.55
  -2  -6   8  152.10   21.84
  -2  -6   8  214.36   26.11
   2   6  -7   36.91   10.40
   2   6  -7   46.61   11.33
   2   6  -7   37.90    9.32
  -2  -6   7   25.62    9.80
  -2  -6   7   34.55    8.29
   2   6  -7   29.44    8.37
   2   6  -6  103.64   16.69
   2   6  -6  127.96   18.19
  -2  -6   6  105.63   14.70
   2   6  -6  147.18   15.10
  -2  -6   6  137.65   17.67
  -2  -6   6  169.83   20.71
   2   6  -6  150.27   14.90
   2   6  -5   -5.29    6.51
   2   6  -5    5.86    4.67
  -2  -6   5    4.85    3.17
   2   6  -5    4.22    2.43
  -2  -6   5    1.87    1.94
  -2  -6   5    3.44    2.84
   2   6  -5    5.88    3.21
   2   6  -4   38.72    9.99
   2   6  -4   36.26    9.34
  -2  -6   4   46.76   10.59
   2   6  -4   61.44   12.52
  -2  -6   4   53.10   11.57
   2   6  -4   62.96   13.79
   2   6  -3 1199.26   39.76
  -2  -6   3 1224.98   35.93
   2   6  -3 1137.74   31.88
  -2  -6   3 1175.15   35.85
   2   6  -3 1267.38   37.51
   2   6  -2    9.24    5.05
  -2  -6   2   10.05    5.45
  -2  -6   2   26.35    7.80
   2   6  -2    9.52    5.06
   2   6  -1  115.20   14.54
   2   6  -1   93.24   12.87
  -2  -6   1  114.19   15.07
  -2  -6   1   96.94   13.88
   2   6  -1   77.01   17.71
   2   6   0   65.84   14.54
   2   6   0   66.45   16.06
  -2  -6   0   55.31   12.52
  -2  -6   0   55.69   16.64
   2   6   0   43.45   10.48
   2   6   1   30.36    6.69
   2   6   1   33.64    8.24
  -2  -6  -1   32.76    7.48
  -2  -6  -1   35.66    7.80
  -2  -6  -1   34.27   11.45
   2   6   2  105.68   19.86
   2   6   2   87.81   17.09
  -2  -6  -2  101.67   17.23
  -2  -6  -2  103.25   19.76
   2   6   2   87.94   15.94
  -2  -6  -2   91.04   18.38
   2   6   3    6.11    3.83
  -2  -6  -3   13.54    4.84
   2   6   3   31.45   10.41
  -2  -6  -3   18.83    6.84
  -2  -6  -3   20.92    6.86
   2   6   3    8.67    5.12
  -2  -6  -3   15.31    9.65
   2   6   4   93.23   20.39
  -2  -6  -4   88.47   16.51
   2   6   4   95.08   18.32
  -2  -6  -4  114.21   18.93
   2   6   4   75.52   18.00
  -2  -6  -4   75.61   20.06
   2   6   5    5.20    3.09
  -2  -6  -5   -1.52    2.66
   2   6   5    7.30    4.57
   2   6   5    9.12    8.62
  -2  -6  -5    2.27    2.29
   2   6   5   -6.32    3.63
  -2  -6  -5   -4.52   11.93
  -2  -6  -6   25.03   11.59
   2   6   6   41.63   14.56
  -2  -6  -6   29.40   12.66
   2   6   6   15.68    8.87
  -2  -6  -6   22.88   11.44
  -2  -6  -7   15.70    8.45
   2   6   7   13.31    9.12
  -2  -6  -7    6.97    5.75
  -2  -6  -7   -4.46   13.35
   2   6   8    5.44    4.93
  -2  -6  -8   16.23   10.30
  -2  -6  -8   18.10   14.41
   2   6   9   21.40   11.64
  -2  -6  -9   25.26   28.04
  -2  -6  -9   32.60   15.46
   2   6  10    9.27    7.64
  -2  -6 -10   17.66   12.64
  -2  -6 -10    7.95   12.19
   2   6  11   12.36   10.40
  -2  -6 -11   26.22   18.31
  -2  -6 -11   47.33   24.92
   2   6  12   37.14   18.46
  -2  -6 -12   11.77   10.15
  -2  -6 -12   14.69   11.73
  -2  -6 -13    8.72    8.20
  -2  -6 -13   -2.21   10.04
  -2  -6 -14   -0.47    9.26
  -2  -6 -14  -12.27   10.92
  -2  -6 -15   19.46   10.49
   2   7 -20   17.71   11.03
   2   7 -19   32.94   14.41
   2   7 -19   -5.05    9.46
   2   7 -18   29.06   17.63
   2   7 -18   22.43   14.54
   2   7 -17   41.97   22.29
   2   7 -17   38.98   20.90
   2   7 -16    2.50    5.21
   2   7 -16   15.72   18.90
   2   7 -15   22.45   12.84
   2   7 -15   18.17   10.61
   2   7 -14   64.59   23.62
   2   7 -14    4.59    5.60
   2   7 -13   42.59   16.35
   2   7 -13   64.83   24.82
   2   7 -12   23.94   12.99
   2   7 -12    8.94    7.29
   2   7 -11   52.40   18.93
   2   7 -11   43.29   15.67
   2   7 -10   18.15    9.13
   2   7 -10   -1.72    6.17
   2   7  -9   86.20   20.62
   2   7  -9   59.62   15.23
  -2  -7   9   35.88   14.38
  -2  -7   9   60.04   17.10
   2   7  -8   16.72    7.34
   2   7  -8    9.46    7.51
   2   7  -8    4.86    4.25
  -2  -7   8   13.53    6.00
  -2  -7   8   18.27    6.31
   2   7  -7  216.59   32.46
   2   7  -7  239.63   35.80
  -2  -7   7  157.64   25.11
  -2  -7   7  197.32   26.76
   2   7  -7  188.17   24.22
   2   7  -6   49.13   13.98
   2   7  -6   83.68   16.67
   2   7  -6   81.03   14.35
  -2  -7   6   73.22   40.82
   2   7  -6   48.59   11.60
   2   7  -5  323.40   30.50
   2   7  -5  317.80   29.38
  -2  -7   5  296.16   38.32
   2   7  -5  291.42   30.42
   2   7  -4    5.40    4.20
  -2  -7   4    7.23    5.58
   2   7  -4   10.91    6.35
  -2  -7   4    5.70    4.79
   2   7  -4    8.24    5.37
   2   7  -3  399.84   18.51
  -2  -7   3  406.70   17.62
  -2  -7   3  426.58   44.21
   2   7  -3  338.21   40.08
   2   7  -2  110.12   19.11
   2   7  -2   90.66   16.88
  -2  -7   2   92.73   17.87
  -2  -7   2   81.89   16.52
   2   7  -2   88.44   15.40
   2   7  -1  264.01   29.14
   2   7  -1  212.03   28.80
  -2  -7   1  204.28   23.30
  -2  -7   1  211.42   27.17
   2   7   0  326.74   32.46
   2   7   0  332.94   29.84
  -2  -7   0  328.02   34.66
  -2  -7   0  311.10   39.90
   2   7   1  589.41   42.57
   2   7   1  614.64   42.08
  -2  -7  -1  473.52   47.14
  -2  -7  -1  570.13   36.81
  -2  -7  -1  591.98   43.05
   2   7   2  300.14   23.08
   2   7   2  335.41   37.40
  -2  -7  -2  305.52   21.74
  -2  -7  -2  289.90  101.08
   2   7   3   27.91   11.60
   2   7   3   16.07    9.79
  -2  -7  -3   15.76    9.00
  -2  -7  -3   -0.93   12.36
   2   7   4   19.52    8.87
  -2  -7  -4   16.01    9.10
   2   7   4   18.63    9.15
  -2  -7  -4   15.76    9.10
  -2  -7  -4   18.21   11.48
   2   7   5   75.71   24.58
  -2  -7  -5   68.98   24.94
   2   7   5  141.15   32.78
  -2  -7  -5   88.47   24.44
  -2  -7  -5   91.20   28.32
  -2  -7  -6   31.90   13.06
   2   7   6   69.11   26.07
  -2  -7  -6   43.18   15.20
  -2  -7  -6   12.62   11.60
   2   7   7   -0.53    5.56
  -2  -7  -7   10.67    8.61
  -2  -7  -7  -27.38   12.91
   2   7   8    6.76    7.16
  -2  -7  -8   -0.25    5.43
  -2  -7  -8   17.98   13.11
   2   7   9  114.37   32.90
  -2  -7  -9  111.67   31.57
  -2  -7  -9  116.10   31.83
   2   7  10   39.67   19.93
  -2  -7 -10   47.77   20.04
  -2  -7 -10   23.75   19.86
   2   7  11   -3.33    4.72
  -2  -7 -11  -12.14    7.40
  -2  -7 -11   -0.89   13.70
   2   7  12   23.73   15.25
  -2  -7 -12   18.42   11.33
  -2  -7 -12   22.12   15.47
  -2  -7 -13   -5.71    7.03
  -2  -7 -13   22.02   13.77
  -2  -7 -14   -0.28    6.72
  -2  -7 -14   13.95    8.67
   2   8 -20    7.38   10.81
   2   8 -19   -6.44    8.89
   2   8 -18   46.39   19.49
   2   8 -18   77.95   27.03
   2   8 -17   21.37   13.45
   2   8 -17   12.54   10.68
   2   8 -16   10.89   10.79
   2   8 -16   32.84   17.17
   2   8 -15   92.85   17.13
   2   8 -15   29.07   16.69
   2   8 -14   49.80   18.66
   2   8 -14   49.95   15.95
   2   8 -13    7.53    7.88
   2   8 -13   17.12   11.05
   2   8 -12  275.54   40.93
   2   8 -12  187.13   23.98
   2   8 -11   -1.22    7.65
   2   8 -11   56.30   20.79
   2   8 -10    9.93    7.96
   2   8 -10   11.87    7.54
  -2  -8  10   12.13    7.52
   2   8  -9  153.20   37.41
   2   8  -9  131.06   32.24
  -2  -8   9   82.02   22.38
  -2  -8   9   92.07   32.39
   2   8  -8  139.83   30.28
   2   8  -8  154.45   33.84
  -2  -8   8  111.25   25.01
  -2  -8   8  135.73   32.70
   2   8  -7    5.02    5.96
   2   8  -7   12.25    7.37
  -2  -8   7    0.98    2.11
  -2  -8   7   23.73    9.55
   2   8  -6    5.47    4.69
   2   8  -6   -1.77    3.60
  -2  -8   6    3.36    2.43
  -2  -8   6    5.14    4.60
   2   8  -6    5.93    4.39
   2   8  -5    2.25    5.54
   2   8  -5    6.36    4.41
  -2  -8   5    9.76    6.27
   2   8  -5    1.43    1.92
   2   8  -4   27.10   10.96
  -2  -8   4   30.69   13.40
   2   8  -4    8.91    5.46
   2   8  -3  124.39   25.23
   2   8  -3  106.89   21.62
  -2  -8   3  102.42   20.95
   2   8  -2   -0.69    4.65
   2   8  -2   -4.17    5.87
  -2  -8   2   -4.88   10.63
   2   8  -1   15.82    6.38
   2   8  -1   29.45   10.69
  -2  -8   1   33.45   12.69
   2   8   0  453.16   31.54
   2   8   0  450.80   32.89
  -2  -8   0  439.88   52.34
   2   8   1   11.62    8.12
   2   8   1   13.44    7.88
  -2  -8  -1   17.44   14.81
   2   8   2   42.11   16.90
   2   8   2   59.18   14.02
  -2  -8  -2   40.41   15.54
  -2  -8  -2   67.95   19.70
   2   8   3 1651.36 1343.77
   2   8   3 1567.31 1275.49
  -2  -8  -3 1554.06 1264.55
  -2  -8  -3 1508.52   63.08
   2   8   4   20.99   11.12
  -2  -8  -4   12.77    8.35
   2   8   4   25.92   13.45
  -2  -8  -4   13.97    9.28
  -2  -8  -4   17.41   10.43
   2   8   5  202.04   16.82
  -2  -8  -5  206.94   14.69
   2   8   5  222.78   28.07
  -2  -8  -5  166.02   21.43
  -2  -8  -5  173.52   31.39
   2   8   6   36.50   16.40
   2   8   6   50.58   19.19
  -2  -8  -6   51.31   19.90
  -2  -8  -6   56.95   23.39
   2   8   7   43.79   15.44
  -2  -8  -7   31.77   14.79
  -2  -8  -7   -0.52   11.97
   2   8   8   93.54   24.95
  -2  -8  -8   75.28   19.52
  -2  -8  -8   81.48   24.81
   2   8   9   23.39   16.38
  -2  -8  -9    9.98    8.70
  -2  -8  -9   61.17   25.74
   2   8  10    8.21    7.78
  -2  -8 -10   -0.32    6.13
  -2  -8 -10   41.00   21.85
   2   8  11   21.39   13.19
  -2  -8 -11   25.29   15.54
  -2  -8 -11   10.93   13.55
  -2  -8 -12   24.56   12.36
  -2  -8 -12   32.26   16.82
  -2  -8 -13   15.42    6.95
   2   9 -20   17.87   11.65
   2   9 -19   32.30   19.98
   2   9 -19   11.45   11.44
   2   9 -18   -9.91    9.65
   2   9 -18   16.31   16.43
   2   9 -17    6.71    7.88
   2   9 -17   22.73   14.32
   2   9 -16   23.18   16.60
   2   9 -16   58.10   20.80
   2   9 -15   44.30   19.52
   2   9 -15   37.39   17.37
   2   9 -14    9.53   10.88
   2   9 -14   -2.19    7.74
   2   9 -13    6.32    7.74
   2   9 -13   33.78   16.71
   2   9 -12   16.76   11.07
   2   9 -12   35.01   13.50
   2   9 -11   18.75   11.66
   2   9 -11   21.73   11.56
  -2  -9  11    7.00    5.24
   2   9 -10   12.52    9.30
   2   9 -10   50.33   17.68
  -2  -9  10   20.30   10.90
   2   9  -9  286.62   29.88
   2   9  -9  290.07   36.17
  -2  -9   9  160.16   42.07
  -2  -9   9  279.14   35.66
   2   9  -8   -1.37    8.69
   2   9  -8   11.92    7.47
  -2  -9   8    4.43    3.63
  -2  -9   8   21.48   10.97
   2   9  -7  165.73   30.04
   2   9  -7  149.40   31.28
  -2  -9   7   92.98   24.26
  -2  -9   7  136.98   33.89
   2   9  -6  156.49   33.08
   2   9  -6  123.18   26.42
  -2  -9   6  126.03   26.18
   2   9  -6   60.55   20.28
   2   9  -5   28.07   10.80
  -2  -9   5   29.37   11.58
   2   9  -4    4.29    2.92
   2   9  -4   -1.29    7.54
  -2  -9   4   22.39    9.39
   2   9  -3    1.75    2.68
   2   9  -3    9.26    5.46
  -2  -9   3   10.83    8.56
   2   9  -2   19.99    7.67
   2   9  -2   18.69   14.18
  -2  -9   2   -5.28    9.53
   2   9  -1   39.56   15.49
   2   9  -1   48.17   18.29
  -2  -9   1   63.15   17.60
   2   9   0    5.69    5.45
   2   9   0    4.61    4.87
  -2  -9   0    7.94    8.44
   2   9   1  202.02   46.79
   2   9   1  280.29   26.53
  -2  -9  -1  183.86   49.46
   2   9   2  231.39   30.97
   2   9   2  274.58   29.59
  -2  -9  -2  175.00   36.83
  -2  -9  -2  227.06   30.47
   2   9   3   18.85   13.88
   2   9   3   21.19   11.67
  -2  -9  -3   -2.58    3.02
  -2  -9  -3    8.52    8.44
   2   9   4  236.38   29.32
   2   9   4  296.07   38.06
  -2  -9  -4  226.45   16.37
  -2  -9  -4  288.13   44.09
   2   9   5   24.55   17.46
   2   9   5   10.06   12.72
  -2  -9  -5   13.10    9.64
  -2  -9  -5    9.17    7.59
   2   9   6   50.34   20.58
   2   9   6   69.05   17.82
  -2  -9  -6   49.22   15.68
  -2  -9  -6   61.46   19.89
   2   9   7    9.75    9.84
  -2  -9  -7   -0.75    4.33
  -2  -9  -7   12.21   10.35
   2   9   8   12.47    9.67
  -2  -9  -8   17.91   12.01
  -2  -9  -8   -7.47   13.08
   2   9   9   23.38   16.19
  -2  -9  -9   20.55   14.83
  -2  -9  -9   46.25   24.21
   2   9  10   15.01   12.83
  -2  -9 -10  -18.67   13.79
   2   9  11   -6.09    4.55
  -2  -9 -11   35.10   30.57
  -2  -9 -12  -14.72   12.31
  -2  -9 -13   24.93   12.72
   2  10 -20   13.24    6.72
   2  10 -19   14.86    6.12
   2  10 -19    4.14    5.38
   2  10 -18   98.29   46.96
   2  10 -18   58.74   27.67
   2  10 -17  126.58   48.17
   2  10 -17   66.63   24.63
   2  10 -16   -2.69   10.25
   2  10 -16   35.58   19.02
   2  10 -15   18.04   12.46
   2  10 -15   10.29   10.35
   2  10 -14   38.87   16.06
   2  10 -14   20.82   12.13
   2  10 -13   -0.85    9.88
   2  10 -13   -7.74    7.11
   2  10 -12   31.85   20.27
   2  10 -12   40.82   15.85
   2  10 -11   18.94   12.55
   2  10 -11    5.33    5.21
  -2 -10  11  -14.53    4.29
   2  10 -10   53.60   19.08
   2  10 -10   57.30   21.37
  -2 -10  10   35.52   12.50
   2  10  -9   10.98    8.62
   2  10  -9   15.71   10.25
  -2 -10   9    2.32    2.73
  -2 -10   9   20.83   10.87
   2  10  -8  238.27   29.59
   2  10  -8  273.54   33.92
  -2 -10   8  239.54   15.78
  -2 -10   8  266.86   30.63
   2  10  -7  180.49   42.78
   2  10  -7  143.02   37.12
  -2 -10   7  233.09   22.88
   2  10  -6   20.32   11.06
   2  10  -6   21.36   11.28
  -2 -10   6   12.59    9.85
   2  10  -5    4.70    5.16
   2  10  -5   16.23   12.25
  -2 -10   5   -3.38    9.51
   2  10  -4  342.81   35.80
   2  10  -4  323.36   40.02
  -2 -10   4  297.79   44.45
   2  10  -3   46.95   16.36
   2  10  -3   42.70   15.13
  -2 -10   3   18.34    9.20
   2  10  -2   95.00   22.54
   2  10  -2  102.36   24.44
  -2 -10   2   94.24   22.62
   2  10  -1  198.48   48.23
   2  10  -1  228.65   25.95
  -2 -10   1  194.85   46.63
   2  10   0   52.63   19.47
   2  10   0   48.88   18.13
  -2 -10   0   49.25   18.32
   2  10   1   12.54    8.66
   2  10   1    2.74    5.06
  -2 -10  -1   -1.97    5.71
   2  10   2   11.64    4.30
   2  10   2   -3.42    7.87
  -2 -10  -2   35.68   13.46
   2  10   3   63.62   24.87
   2  10   3  101.34   24.81
  -2 -10  -3   49.75   18.77
  -2 -10  -3   71.52   27.45
   2  10   4   -0.11    4.09
   2  10   4    7.61    9.29
  -2 -10  -4    5.73    5.65
  -2 -10  -4   26.43   13.20
   2  10   5  135.74   22.21
  -2 -10  -5   77.58   20.14
  -2 -10  -5  102.08   26.14
   2  10   6   15.99   10.52
  -2 -10  -6   19.99   13.47
   2  10   7   21.37   15.49
  -2 -10  -7   -2.76   13.40
   2  10   8   26.97   15.64
  -2 -10  -8   10.83   12.04
   2  10   9    2.90    4.52
  -2 -10  -9   17.70   11.42
   2  10  10    1.45    3.62
  -2 -10 -10   -6.26    6.44
  -2 -10 -11   -2.49   13.00
  -2 -10 -12  -12.34   11.52
   2  11 -19   -2.48    7.57
   2  11 -18   -3.78    9.78
   2  11 -18   22.16   14.07
   2  11 -17   13.50   14.44
   2  11 -17   -2.82    7.38
   2  11 -16   16.37   14.00
   2  11 -16    5.44    7.44
   2  11 -15   38.85   23.20
   2  11 -15   10.85   10.56
   2  11 -14   25.71   17.77
   2  11 -14   39.53   16.97
   2  11 -13   12.59    8.89
   2  11 -13   -1.43    6.69
   2  11 -12   75.80   19.98
   2  11 -12   67.18   21.60
   2  11 -11   22.98   13.01
   2  11 -11   17.04   10.88
  -2 -11  11   17.30   10.74
   2  11 -10   10.14   11.51
   2  11 -10   11.73    9.56
  -2 -11  10   11.49   10.48
   2  11  -9   20.63   13.59
   2  11  -9   19.88   12.80
  -2 -11   9   39.39   15.72
   2  11  -8   22.05   13.36
   2  11  -8   14.06    8.34
  -2 -11   8   15.65   10.19
   2  11  -7  441.94   49.41
   2  11  -7  426.88   35.68
  -2 -11   7  397.67   56.87
   2  11  -6    1.46    3.27
   2  11  -6   32.67   14.69
  -2 -11   6   16.63   10.77
   2  11  -5   12.86    7.81
   2  11  -5   23.45   13.09
  -2 -11   5   -2.40   10.82
   2  11  -4  117.32   27.33
   2  11  -4  157.45   43.11
  -2 -11   4   88.05   26.17
   2  11  -3   25.63   13.34
   2  11  -3   23.59   12.59
  -2 -11   3   42.44   15.84
   2  11  -2   -6.18    5.93
   2  11  -2    8.19    6.91
  -2 -11   2   22.00   12.52
   2  11  -1  106.01   29.92
   2  11  -1   94.33   24.10
  -2 -11   1  131.13   34.87
   2  11   0   -1.84    6.01
   2  11   0   -9.77    8.14
  -2 -11   0    7.02    7.99
   2  11   1   40.24   15.01
   2  11   1   54.37   22.02
  -2 -11  -1   33.26   16.14
   2  11   2   51.54   18.97
   2  11   2   64.49   22.30
  -2 -11  -2   50.92   19.74
   2  11   3   36.99   15.38
   2  11   3   50.19   22.16
  -2 -11  -3   29.96   17.01
   2  11   4    8.64    9.59
  -2 -11  -4    4.94    8.76
   2  11   5   -1.11    8.14
  -2 -11  -5   -1.21   13.50
   2  11   6   14.89   10.80
  -2 -11  -6   55.88   21.39
   2  11   7   -3.85    6.92
  -2 -11  -7  -14.51   14.24
   2  11   8   23.55   15.07
  -2 -11  -8   29.87   16.28
   2  11   9   -3.55    5.20
  -2 -11  -9   -7.02   14.60
  -2 -11 -10   14.90    8.39
   2  12 -19   24.36   13.27
   2  12 -18   -3.09    8.59
   2  12 -18   -1.02    7.03
   2  12 -17   27.82   17.27
   2  12 -17   38.59   17.05
   2  12 -16   11.06   10.61
   2  12 -16   14.43   12.30
   2  12 -15   15.34   11.04
   2  12 -15  -12.60    7.22
   2  12 -14   -4.55   10.22
   2  12 -14    8.75   11.41
   2  12 -13   78.02   29.91
   2  12 -13   94.00   20.55
   2  12 -12  104.87   19.05
   2  12 -12   82.89   60.75
   2  12 -11   13.55   13.56
   2  12 -11    8.41    6.95
  -2 -12  11   13.70    9.72
   2  12 -10  118.32   28.95
   2  12 -10   58.49   22.13
  -2 -12  10   27.04   13.58
   2  12  -9   88.00   23.75
   2  12  -9   88.70   24.17
   2  12  -9   57.14   22.68
  -2 -12   9   70.56   24.74
   2  12  -8   28.12   14.05
   2  12  -8   27.44   12.51
  -2 -12   8   54.62   19.31
   2  12  -7  147.64   17.00
   2  12  -7  154.99   16.83
  -2 -12   7  140.84   22.62
   2  12  -6   55.81   22.26
   2  12  -6   52.62   20.27
  -2 -12   6   63.62   24.82
   2  12  -5   37.01   15.07
   2  12  -5   54.71   21.65
  -2 -12   5   48.49   18.26
   2  12  -4    6.17    7.14
   2  12  -4   -1.59    5.37
  -2 -12   4   -4.76    9.36
   2  12  -3   23.98   12.18
   2  12  -3   19.22   12.61
  -2 -12   3    5.40    7.51
   2  12  -2   17.14   11.45
   2  12  -2   20.30   12.73
  -2 -12   2    6.37    7.33
   2  12  -1   -2.50    8.09
  -2 -12   1    5.10    6.43
   2  12   0   -2.05    6.67
   2  12   0   24.06   13.25
  -2 -12   0   35.27   39.09
   2  12   1   11.88    9.94
  -2 -12  -1   29.11   15.51
   2  12   2   70.11   23.58
  -2 -12  -2   82.59   28.23
   2  12   3   52.76   59.20
  -2 -12  -3   54.29   26.98
   2  12   4   22.43   15.90
  -2 -12  -4  -18.86   15.07
   2  12   5   -5.25    8.55
  -2 -12  -5   35.23   20.02
   2  12   6   19.76   13.84
  -2 -12  -6   24.85   17.84
   2  12   7    3.11    7.48
  -2 -12  -7    2.35    7.81
   2  12   8   -1.50    5.29
  -2 -12  -8   -0.34   13.94
   2  12   9   10.88    9.85
  -2 -12  -9  -25.05   13.76
   2  13 -16   12.13   11.53
   2  13 -15   38.88   16.89
   2  13 -14   17.06    8.49
   2  13 -13   38.19   18.94
   2  13 -12   45.66   22.29
   2  13 -11    4.87    6.50
   2  13 -11   10.97   10.25
  -2 -13  11    3.46    4.26
   2  13 -10   15.13   10.21
   2  13 -10   14.32   10.74
  -2 -13  10   -2.43    7.71
   2  13  -9   15.11   10.25
   2  13  -9    3.77    6.14
  -2 -13   9   -4.69    9.51
   2  13  -8   -0.21    6.71
   2  13  -8   -7.22    8.89
  -2 -13   8   29.94   15.39
   2  13  -7    3.29    4.27
   2  13  -7    6.87    8.58
  -2 -13   7    3.61    6.48
   2  13  -6   48.17   15.91
   2  13  -6   14.75   12.38
  -2 -13   6   33.69   33.06
   2  13  -5   -3.67    6.54
   2  13  -5   30.64   16.13
  -2 -13   5   -1.46   10.04
   2  13  -4    3.19    5.31
   2  13  -4    9.16    8.27
  -2 -13   4   34.20   14.80
   2  13  -3    8.13    9.74
   2  13  -3   35.02   14.56
  -2 -13   3   -9.87   13.06
   2  13  -2   -8.68    6.78
   2  13  -2    9.61    9.06
  -2 -13   2    9.43   11.77
   2  13  -1    6.48    7.49
   2  13  -1   42.44   18.41
  -2 -13   1   14.81   13.47
   2  13   0    5.12    6.81
   2  13   0   27.10   14.29
  -2 -13   0   -9.82   12.53
   2  13   1   37.59   16.34
  -2 -13  -1   22.76   16.71
   2  13   2   27.31   16.42
  -2 -13  -2   -4.97   12.36
   2  13   3   20.62   11.09
  -2 -13  -3   41.90   23.75
   2  13   4   13.78   13.84
  -2 -13  -4   47.21   26.62
   2  13   5   16.69   15.60
  -2 -13  -5   48.78   25.35
   2  13   6    2.22    4.60
  -2 -13  -6   29.35   17.85
  -2 -13  -7   20.06   16.47
   2  13   8    6.40    7.86
   2  14 -16   -0.52    9.00
   2  14 -15   83.03   29.66
   2  14 -14   49.25   42.34
   2  14 -13    5.91    8.48
   2  14 -13   -5.17    9.48
   2  14 -12   89.96   29.66
   2  14 -12   98.23   34.32
   2  14 -11   -3.83    8.96
   2  14 -11    2.51    6.58
   2  14 -10    0.61    4.82
   2  14 -10    8.62    8.33
   2  14  -9   13.67   10.68
   2  14  -9    3.66    7.03
  -2 -14   9   36.77   18.68
   2  14  -8   57.81   23.15
   2  14  -8   80.63   30.53
  -2 -14   8   65.08   27.96
   2  14  -7   30.27   14.45
   2  14  -7   52.81   59.29
  -2 -14   7   50.38   21.24
   2  14  -6   10.43   11.27
   2  14  -6   60.47   21.17
  -2 -14   6    8.03   10.69
   2  14  -5    8.03    9.25
   2  14  -5   15.51   10.61
  -2 -14   5   51.02   20.37
   2  14  -4    0.81    5.07
   2  14  -4    9.88    8.71
  -2 -14   4   12.25   10.66
   2  14  -3   80.64   32.22
   2  14  -3   87.82   20.62
  -2 -14   3   78.41   30.91
   2  14  -2    8.91    8.25
   2  14  -2    5.95    6.74
  -2 -14   2   -3.19   12.64
   2  14  -1    8.14    9.92
  -2 -14   1   -3.74   13.04
   2  14   0   57.40   18.39
  -2 -14   0   26.02   16.73
   2  14   1   16.20   11.81
  -2 -14  -1    1.85   10.68
   2  14   2   19.55   12.07
  -2 -14  -2   -9.58   14.19
   2  14   3    8.28    8.56
  -2 -14  -3   26.31   17.71
   2  14   4   -0.75    9.29
  -2 -14  -4   11.05   12.31
   2  14   5   10.16   11.03
  -2 -14  -5   15.14   14.05
   2  14   6   13.10   11.17
   2  14   7   -2.11    4.90
   2  15 -16   -1.49    8.93
   2  15 -15   17.27   11.03
   2  15 -15   -2.47    8.47
   2  15 -14    5.42    6.79
   2  15 -14   25.67   15.51
   2  15 -13   97.39   34.29
   2  15 -13   57.92   23.66
   2  15 -12   10.56   11.66
   2  15 -11   29.65   15.68
   2  15 -11   51.21   23.26
   2  15 -10   63.82   28.92
   2  15 -10  100.58   29.89
  -2 -15  10   56.12   25.41
   2  15  -9   -3.50    8.21
   2  15  -9   12.56   11.39
  -2 -15   9   16.19   12.00
   2  15  -8    5.81    6.96
   2  15  -8   -9.11   10.43
  -2 -15   8    6.18    6.72
   2  15  -7   21.55   16.13
   2  15  -7   22.11   15.25
  -2 -15   7   22.43   18.32
   2  15  -6    2.21    6.52
   2  15  -6  -13.04   10.23
  -2 -15   6  -15.36   12.31
   2  15  -5   21.75   14.62
   2  15  -5    0.63    8.46
  -2 -15   5   25.78   14.94
   2  15  -4   16.11   11.38
   2  15  -4   33.27   17.10
  -2 -15   4   -5.35   11.87
   2  15  -3    8.71   10.36
  -2 -15   3   21.19   12.89
   2  15  -2   40.08   20.69
  -2 -15   2   15.81   21.10
   2  15  -1  -10.24    9.03
  -2 -15   1  -17.56   13.75
   2  15   0   37.50   17.13
  -2 -15   0   13.25   12.85
   2  15   1   60.84   24.06
  -2 -15  -1   20.32   18.80
   2  15   2   38.21   15.72
  -2 -15  -2   31.80   16.51
  -2 -15  -3   19.31   14.60
   2  15   4   -9.33    8.37
  -2 -15  -4   27.17   16.35
   2  15   5    3.88    4.86
   2  16 -15   -3.22    7.80
   2  16 -14   15.97    9.63
   2  16 -14    5.06    6.81
   2  16 -13   23.41   12.86
   2  16 -13   -9.45    8.26
   2  16 -12   12.65    6.25
   2  16 -12   18.61   15.14
   2  16 -11   -3.13    8.72
   2  16 -11  -18.62   10.13
   2  16 -10   42.24   20.19
   2  16 -10   64.68   24.32
   2  16  -9   22.64   14.31
   2  16  -9   16.37   14.58
  -2 -16   9   -3.37    8.53
   2  16  -8    6.31    7.13
   2  16  -8   35.57   15.78
  -2 -16   8   15.66   13.63
   2  16  -7   37.79   18.48
   2  16  -7   64.62   22.02
  -2 -16   7   22.40   17.65
   2  16  -6   13.05   11.46
   2  16  -6   -5.68    9.78
  -2 -16   6   28.13   17.42
   2  16  -5    3.04    7.20
  -2 -16   5   18.50   12.60
   2  16  -4   28.76   17.71
  -2 -16   4   61.89   24.71
   2  16  -3   27.44   14.46
  -2 -16   3   38.44   15.50
   2  16  -2   23.23   17.00
  -2 -16   2   -4.98    8.92
   2  16  -1   -3.20    9.82
  -2 -16   1  -17.06   13.81
   2  16   0   30.03   18.43
  -2 -16   0   -1.10   12.85
   2  16   1   -6.42    8.24
  -2 -16  -1   17.58   12.38
   2  16   2   23.29   11.75
   2  16   3   33.43   18.09
   2  17 -14   27.76   14.50
   2  17 -13    9.69    9.60
   2  17 -12    6.26    8.44
   2  17 -11    9.07    9.01
   2  17 -11   14.89    7.66
   2  17 -10   25.99   15.60
   2  17 -10   14.92   12.28
   2  17  -9   21.87   13.15
   2  17  -9   15.63   13.91
  -2 -17   9   23.18   15.79
   2  17  -8   21.61   12.92
  -2 -17   8   -6.35    9.48
   2  17  -7   39.71   17.68
  -2 -17   7    5.52    7.66
   2  17  -6   52.05   24.30
  -2 -17   6   -7.21   11.67
   2  17  -5   23.05   15.09
  -2 -17   5    1.72    7.01
   2  17  -4   31.45   18.63
  -2 -17   4   48.79   22.23
   2  17  -3   38.04   16.00
  -2 -17   3  -13.83   13.40
   2  17  -2   33.52   17.97
  -2 -17   2   31.25   16.91
   2  17  -1   29.29   17.48
  -2 -17   1   18.95   12.02
   2  17   0   12.09   11.10
  -2 -18   8    7.72   10.30
  -2 -18   7   15.38   10.75
  -2 -18   6   45.60   21.22
  -2 -18   5   18.05   10.29
  -2 -18   4    9.73   11.29
  -3  19  -5    9.32    9.81
  -3  19  -6   22.15   12.41
   3 -19   7   19.65   11.09
  -3  18  -2   21.26   13.49
  -3  18  -3   14.16    7.22
   3 -18   3   19.64   10.09
  -3  18  -4   66.05   31.22
  -3  18  -4   74.37   33.99
   3 -18   4   67.01   31.27
  -3  18  -5    5.35    6.72
  -3  18  -5    8.20   10.26
   3 -18   5   17.02   11.83
  -3  18  -6   36.17   18.05
  -3  18  -6   36.32   16.50
   3 -18   6   16.98   11.64
  -3  18  -7  104.77   46.09
  -3  18  -7   77.08   35.82
   3 -18   7   21.90   13.57
  -3  18  -8   26.61   14.42
  -3  18  -8    6.61    8.92
   3 -18   8   19.15   10.90
  -3  18  -9   -5.05   10.94
   3 -18   9   -5.28    6.48
  -3  18 -10   22.33   12.05
  -3  17   0   67.18   33.71
  -3  17   0    9.85   10.10
   3 -17   0   19.15   12.93
  -3  17  -1    2.04   12.06
  -3  17  -1   20.23   12.96
   3 -17   1    6.07    7.09
  -3  17  -2   11.22   14.23
  -3  17  -2   30.12   20.93
   3 -17   2   53.03   23.79
  -3  17  -3   40.20   25.06
  -3  17  -3   24.61   13.95
   3 -17   3   22.96   17.47
  -3  17  -4   17.70   13.37
  -3  17  -4    9.30   10.48
   3 -17   4   15.26   14.29
  -3  17  -5    6.93    9.57
  -3  17  -5    5.79   10.34
   3 -17   5   14.10   12.66
  -3  17  -6   34.86   32.48
  -3  17  -6   -8.87   10.73
   3 -17   6   23.59   16.67
  -3  17  -7    4.93    9.39
  -3  17  -7   27.42   15.32
   3 -17   7   -0.62    9.33
  -3  17  -8    3.38    6.09
  -3  17  -8  -16.26   10.78
   3 -17   8   11.82   10.15
  -3  17  -9    7.24    9.08
  -3  17  -9   19.37   15.51
   3 -17   9    8.85    8.83
  -3  17 -10   30.82   18.63
  -3  17 -10   13.88    4.87
  -3  17 -11   28.16   16.63
  -3  17 -11   20.34   11.72
  -3  17 -12   18.44   10.99
  -3  17 -12   29.53   16.05
  -3  16   3   37.38   20.65
   3 -16  -3   26.14   15.60
  -3  16   2    9.22   11.27
  -3  16   2   39.88   18.72
   3 -16  -2    7.99   12.99
  -3  16   1    5.88   10.09
  -3  16   1   18.48   12.12
   3 -16  -1   -6.19   12.14
  -3  16   0   -4.04   13.67
  -3  16   0   39.95   17.06
   3 -16   0   32.02   16.63
  -3  16  -1  -21.10   12.82
  -3  16  -1   -9.86   11.45
   3 -16   1   -7.08   10.70
  -3  16  -2  -16.54   14.44
   3 -16   2   37.03   18.59
  -3  16  -3   19.86   15.30
  -3  16  -3   26.77   16.21
   3 -16   3   17.26   10.83
  -3  16  -4  -32.87   12.87
  -3  16  -4    2.53    6.71
   3 -16   4   -2.46   10.46
  -3  16  -5  199.07   54.06
  -3  16  -5  218.57   61.34
   3 -16   5  129.29   42.85
  -3  16  -6   13.03   10.16
  -3  16  -6   15.07   11.48
   3 -16   6    9.86    9.88
  -3  16  -7   -1.61   11.93
  -3  16  -7    5.37    9.16
   3 -16   7    5.00    6.03
  -3  16  -8   -1.42   11.84
  -3  16  -8   12.34   12.15
   3 -16   8   -6.52    8.26
  -3  16  -9   19.62   16.67
  -3  16  -9   18.44   11.23
   3 -16   9   10.25   10.26
  -3  16 -10   33.69   18.31
  -3  16 -10   29.08   15.50
   3 -16  10    9.72    8.99
  -3  16 -11   13.46   11.49
  -3  16 -11   16.74   14.59
  -3  16 -12   42.11   20.17
  -3  16 -12   27.71   16.99
  -3  16 -13   34.56   16.77
  -3  16 -13   38.18   17.15
  -3  16 -14   32.62   16.89
  -3  15   5   23.88   13.36
   3 -15  -5    7.48   11.34
  -3  15   4   -2.28   10.78
  -3  15   4   35.92   16.74
   3 -15  -4    9.07   10.39
  -3  15   3   37.96   17.70
  -3  15   3   30.65   19.08
   3 -15  -3   21.54   16.04
  -3  15   2   -2.67   14.22
  -3  15   2   15.67   13.53
   3 -15  -2   11.28   12.73
  -3  15   1   42.45   19.13
  -3  15   1   59.61   21.32
   3 -15  -1   60.28   29.21
  -3  15   0   -1.80   14.46
  -3  15   0   17.55   10.35
   3 -15   0   12.99   10.77
  -3  15  -1   59.11   22.89
  -3  15  -1   60.99   19.60
   3 -15   1   35.86   17.67
  -3  15  -2    6.00    7.63
  -3  15  -2   23.51   18.93
   3 -15   2  -27.62   10.37
  -3  15  -3   41.13   20.60
  -3  15  -3   31.55   17.37
   3 -15   3   60.91   21.91
  -3  15  -4   26.29   14.80
  -3  15  -4   -8.92   10.44
   3 -15   4   -6.30   10.77
  -3  15  -5   14.42   11.36
  -3  15  -5   -3.13    9.79
   3 -15   5   23.23   16.02
  -3  15  -6   99.34   28.02
  -3  15  -6  126.95   32.68
   3 -15   6   72.53   23.64
  -3  15  -7   28.44   15.31
  -3  15  -7   26.84   14.37
   3 -15   7    3.91    5.53
  -3  15  -8    9.61   11.63
  -3  15  -8   19.71   15.91
   3 -15   8   -4.30    6.06
  -3  15  -9   -8.86   13.00
  -3  15  -9   14.20   10.30
   3 -15   9    8.32    8.28
  -3  15 -10    5.90    9.59
  -3  15 -10   20.19   11.05
   3 -15  10   -1.38    7.06
  -3  15 -11   30.22   14.14
   3 -15  11   25.76   15.43
  -3  15 -12   14.45   13.18
  -3  15 -12   48.27   21.51
  -3  15 -13   51.89   20.15
  -3  15 -13   26.74   14.59
  -3  15 -14   30.56   17.64
  -3  15 -14    8.63    9.78
  -3  15 -15   -2.69   10.74
  -3  15 -15   20.14   10.78
   3 -14  -7   22.54   13.84
   3 -14  -6   36.57   21.81
  -3  14   5   37.31   19.35
  -3  14   5   66.97   30.72
   3 -14  -5   23.99   15.39
  -3  14   4  188.36  181.47
  -3  14   4  195.50  188.00
   3 -14  -4   83.55   41.88
  -3  14   3   81.64   27.39
  -3  14   3   38.74   23.48
   3 -14  -3   65.15   29.67
  -3  14   2   46.41   25.16
  -3  14   2   61.62   21.14
  -3  14   1  124.64   36.10
  -3  14   1  142.91   36.64
   3 -14  -1   86.75   24.41
  -3  14   0   90.90   24.48
  -3  14   0  114.91   25.10
   3 -14   0   94.78   20.25
  -3  14  -1  128.66   30.85
  -3  14  -1  137.78   30.01
   3 -14   1  118.87   25.32
  -3  14  -2    0.10   16.72
  -3  14  -2   -5.79   10.23
   3 -14   2  -10.82   10.25
  -3  14  -3   57.00   24.36
  -3  14  -3    1.38    8.07
   3 -14   3   19.01   11.67
  -3  14  -4   61.86   22.24
  -3  14  -4   24.63   14.33
   3 -14   4   14.88   12.55
  -3  14  -5   39.35   17.02
  -3  14  -5   58.76   20.47
   3 -14   5   28.97   15.48
  -3  14  -6  -15.28   11.07
  -3  14  -6   20.63   12.67
   3 -14   6  -10.74    8.61
  -3  14  -7  -10.39   11.30
  -3  14  -7   -8.27    9.77
   3 -14   7   15.71   11.19
  -3  14  -8   12.00    9.97
  -3  14  -8   23.00   16.33
   3 -14   8    6.86    6.92
  -3  14  -9   35.87   16.90
  -3  14  -9   86.11   20.38
   3 -14   9   50.08   24.18
  -3  14 -10   48.08   24.36
  -3  14 -10   54.98   17.87
   3 -14  10   66.56   20.75
  -3  14 -11  -11.83   11.38
   3 -14  11   34.78   17.21
  -3  14 -11    1.21    6.57
   3 -14  11    4.89    4.96
  -3  14 -12   17.14    8.30
   3 -14  12   27.14   15.71
  -3  14 -12   21.95   14.10
  -3  14 -13   79.76   28.79
   3 -14  13   96.76   34.66
  -3  14 -13   94.50   33.98
  -3  14 -14   21.46   14.74
   3 -14  14   -1.31   10.95
  -3  14 -14   -1.14    8.82
  -3  14 -14   17.46   13.43
  -3  14 -15  -15.63   11.50
   3 -14  15   -3.35   10.35
  -3  14 -15   16.28   13.31
  -3  14 -15   21.69   14.10
  -3  14 -16   36.31   17.14
  -3  14 -16   11.11   10.14
  -3  14 -16   22.60   12.12
  -3  14 -17   23.91   13.28
  -3  14 -17    7.81    9.54
   3 -13  -9   12.06   12.96
   3 -13  -8   27.62   18.07
  -3  13   7   14.13   13.31
   3 -13  -7   23.19   17.46
  -3  13   6   21.47   15.02
   3 -13  -6  -18.81   12.77
  -3  13   5   34.82   21.29
  -3  13   5   34.33   18.58
   3 -13  -5   44.96   21.43
  -3  13   4   40.10   19.57
  -3  13   4    7.01   10.29
   3 -13  -4    7.12    6.87
   3 -13  -4   26.35   14.10
  -3  13   3   48.69   23.34
  -3  13   3   -3.10   11.09
   3 -13  -3    1.39    2.65
   3 -13  -3  -16.46   11.36
  -3  13   2   31.01   18.16
  -3  13   2   69.62   26.80
   3 -13  -2   16.19   10.60
   3 -13  -2   32.20   18.64
  -3  13   1   49.66   21.29
  -3  13   1   12.75   10.29
   3 -13  -1   41.12   15.93
   3 -13  -1   52.86   22.51
  -3  13   0   29.99   14.88
  -3  13   0   21.05   16.27
   3 -13   0    6.75    8.04
   3 -13   0   12.13   11.45
  -3  13  -1  236.67   39.43
  -3  13  -1  226.13   41.40
   3 -13   1  254.63   44.81
  -3  13  -2    8.21    9.67
  -3  13  -2    6.44    7.87
   3 -13   2   24.96   28.03
  -3  13  -3   32.57   15.80
  -3  13  -3   29.67   15.90
   3 -13   3   27.64   13.52
  -3  13  -4  116.30   31.10
  -3  13  -4  172.65   20.97
   3 -13   4  134.99   14.37
  -3  13  -5  -10.34   12.20
  -3  13  -5   11.25    8.67
   3 -13   5    0.65    4.71
  -3  13  -6   21.54   12.95
  -3  13  -6   19.24   11.67
   3 -13   6   11.81    8.42
  -3  13  -7   12.85   11.57
  -3  13  -7   22.78   15.39
   3 -13   7   20.72   14.11
  -3  13  -8  -24.19   10.53
   3 -13   8   25.44   14.12
  -3  13  -8   23.15   16.97
   3 -13   8   -6.18    7.87
  -3  13  -9  -13.53   11.16
   3 -13   9   18.39   10.51
  -3  13  -9    2.61    6.00
   3 -13   9   11.10   10.89
  -3  13 -10   -3.64   11.44
   3 -13  10   30.74   16.08
  -3  13 -10    2.31    4.56
   3 -13  10   29.55   15.70
  -3  13 -11   85.17   20.66
   3 -13  11   56.82   22.26
  -3  13 -11   32.91   15.03
   3 -13  11   44.65   18.57
  -3  13 -12   15.04   11.43
   3 -13  12   17.49   13.06
  -3  13 -12   22.65   16.22
  -3  13 -12    6.29   14.27
  -3  13 -13   16.73   14.68
   3 -13  13   25.88   17.66
  -3  13 -13   24.32   14.78
  -3  13 -13   20.28   11.90
  -3  13 -14   29.72   13.68
   3 -13  14   -2.35    9.96
  -3  13 -14   -9.21    7.83
  -3  13 -14   28.12   17.15
  -3  13 -15   21.32   14.86
   3 -13  15   11.79   11.27
  -3  13 -15   12.25   10.42
  -3  13 -15   32.34   16.42
  -3  13 -16   28.70   16.85
   3 -13  16   19.35   15.27
  -3  13 -16   32.03   17.64
  -3  13 -16   -0.64   11.66
   3 -13  17    9.25    9.80
  -3  13 -17   15.68    8.09
  -3  13 -17   37.89   17.43
   3 -13  18   10.62   11.15
  -3  13 -18  -17.92   10.29
   3 -12 -11   33.22   18.67
   3 -12 -10   35.46   18.94
   3 -12  -9    3.23    7.51
  -3  12   8    7.06   13.06
   3 -12  -8   15.63   16.32
  -3  12   7   -2.89   14.15
   3 -12  -7    9.32    9.31
   3 -12  -7  -26.19   10.27
  -3  12   6   10.12   12.80
   3 -12  -6   -0.50    4.46
   3 -12  -6    9.59    9.35
  -3  12   5   50.87   23.34
  -3  12   5   47.73   20.36
   3 -12  -5    9.34    7.93
   3 -12  -5   60.17   24.84
  -3  12   4   -9.84   12.79
  -3  12   4    8.95   10.08
   3 -12  -4   -6.67    4.76
   3 -12  -4   -4.28   10.65
  -3  12   3   36.85   17.38
  -3  12   3    8.15    9.51
   3 -12  -3    4.26    6.03
   3 -12  -3   11.71   11.23
  -3  12   2   -8.42   12.42
  -3  12   2   26.91   14.44
   3 -12  -2   37.50   14.66
   3 -12  -2    8.84    8.21
  -3  12   1   36.45   14.43
  -3  12   1   18.30   12.79
   3 -12  -1    5.26    5.21
   3 -12  -1    2.79    6.99
  -3  12   0   28.55   13.87
  -3  12   0   46.39   17.39
   3 -12   0   26.03   12.89
  -3  12  -1   59.40   24.53
  -3  12  -1   64.59   25.79
   3 -12   1   58.49   23.88
  -3  12  -2   60.65   26.01
  -3  12  -2   45.78   18.40
   3 -12   2   52.24   21.45
  -3  12  -3   14.72   11.27
  -3  12  -3   22.35   10.43
   3 -12   3   19.06   12.48
  -3  12  -4  277.31   29.38
  -3  12  -4  257.11   29.06
   3 -12   4  310.04   27.39
  -3  12  -5   72.60   70.45
  -3  12  -5   74.28   19.65
   3 -12   5   67.71   25.89
  -3  12  -6   -6.67   10.30
   3 -12   6   -5.06    9.92
  -3  12  -6    5.90    5.95
   3 -12   6   14.43   11.08
  -3  12  -7  198.86   25.91
   3 -12   7  210.05   24.28
  -3  12  -7  170.14   20.90
   3 -12   7  155.62   15.62
  -3  12  -8  -13.20    9.92
   3 -12   8  -17.84   10.33
   3 -12   8    6.98    7.33
  -3  12  -9   28.47   13.62
   3 -12   9   16.90   11.67
  -3  12  -9    5.13    6.32
   3 -12   9   -6.31    6.40
  -3  12 -10  156.35   35.48
   3 -12  10  187.71   38.31
  -3  12 -10  177.68   33.09
  -3  12 -10  171.84   27.16
   3 -12  10  191.91   29.52
  -3  12 -11   89.31   22.21
   3 -12  11  115.23   20.12
  -3  12 -11   72.96   26.84
  -3  12 -11   67.32   27.57
   3 -12  11   69.31   22.72
  -3  12 -12   14.97   13.80
   3 -12  12   12.32   10.63
  -3  12 -12    3.60    5.50
  -3  12 -12   13.76   11.48
   3 -12  12    9.59    8.13
  -3  12 -13   12.06   13.95
   3 -12  13   25.58   14.50
  -3  12 -13   15.96   12.06
  -3  12 -13   -0.72    6.85
  -3  12 -14   -7.13   10.90
   3 -12  14   20.34   10.04
  -3  12 -14    6.94    8.81
  -3  12 -14    3.23    7.41
  -3  12 -15   40.45   21.14
   3 -12  15   33.75   15.08
  -3  12 -15   13.64   11.77
  -3  12 -15   -7.97   12.49
  -3  12 -16   20.91   15.06
   3 -12  16    7.15    8.25
  -3  12 -16    5.29    8.11
  -3  12 -16   12.07   12.67
  -3  12 -17   46.37   40.81
   3 -12  17   38.93   17.36
  -3  12 -17   46.96   41.04
  -3  12 -17    9.14   10.14
   3 -12  18    8.72    8.45
  -3  12 -18    5.16    7.10
  -3  12 -18   28.47   15.94
   3 -11 -12  -11.21    8.31
   3 -11 -11   14.00    6.81
  -3  11  10   19.24   14.18
   3 -11 -10   12.60    4.82
   3 -11 -10   35.77   17.45
  -3  11   9   23.91   18.81
   3 -11  -9   31.91   14.77
   3 -11  -9   34.61   18.45
  -3  11   8   26.68   17.72
   3 -11  -8   12.90    8.97
   3 -11  -8   20.04   10.66
  -3  11   7   -4.44   14.42
   3 -11  -7    6.20    6.84
   3 -11  -7   15.89   17.79
  -3  11   6  104.87   26.69
   3 -11  -6   71.42   27.85
   3 -11  -6   76.82   31.13
  -3  11   5   45.31   16.51
  -3  11   5   28.50   15.54
   3 -11  -5   37.94   15.43
   3 -11  -5   35.59   13.85
  -3  11   4  149.20   30.63
  -3  11   4  151.43   26.21
   3 -11  -4  120.49   32.79
   3 -11  -4  116.64   28.20
  -3  11   3   97.37   26.93
  -3  11   3   94.02   25.68
   3 -11  -3   61.30   21.23
   3 -11  -3   27.06   12.82
  -3  11   2   12.02   11.89
  -3  11   2   -4.72    9.44
   3 -11  -2  126.85  121.30
   3 -11  -2    9.53    7.36
  -3  11   1  -19.84   14.07
  -3  11   1    8.84    8.76
   3 -11  -1   26.43   14.06
  -3  11   0   31.20   13.15
  -3  11   0    9.15    8.15
   3 -11   0    7.60    8.34
  -3  11  -1  146.82   37.61
  -3  11  -1  155.71   39.20
   3 -11   1  103.96   31.35
   3 -11   1  196.79   46.69
  -3  11  -2   58.85   21.73
  -3  11  -2   45.77   16.30
   3 -11   2   40.12   17.02
   3 -11   2   40.22   18.60
  -3  11  -3   16.95   10.25
  -3  11  -3   13.09   10.32
   3 -11   3    2.11    3.16
   3 -11   3   -8.61    8.23
  -3  11  -4   12.55    9.53
   3 -11   4   56.55   24.46
  -3  11  -4   23.07   11.60
   3 -11   4   41.10   17.45
  -3  11  -5   18.12   15.81
   3 -11   5   24.05   12.71
  -3  11  -5    2.51    5.05
   3 -11   5   16.81    8.94
  -3  11  -6   48.82   19.28
  -3  11  -6   46.26   17.16
   3 -11   6   24.68   13.37
  -3  11  -7   30.76   11.56
   3 -11   7   18.25   13.53
  -3  11  -7   19.66   11.05
   3 -11   7   17.06   10.46
  -3  11  -8   25.27   13.51
   3 -11   8   -5.08   10.40
  -3  11  -8   -9.83    8.63
   3 -11   8    4.78    3.45
  -3  11  -9   28.99   13.11
   3 -11   9   27.61   13.73
  -3  11  -9   36.49   14.34
  -3  11  -9   30.46   14.54
   3 -11   9   32.57   14.75
  -3  11 -10    9.87    8.04
   3 -11  10    7.58    8.45
  -3  11 -10   17.32   10.88
  -3  11 -10   -5.10   12.13
   3 -11  10   10.19    7.74
  -3  11 -11   27.75   16.56
   3 -11  11   39.55   15.53
  -3  11 -11   52.44   18.64
  -3  11 -11   41.22   18.03
   3 -11  11   29.33   13.78
  -3  11 -12  238.21   45.53
   3 -11  12  247.08   47.12
  -3  11 -12  205.47   35.63
  -3  11 -12  212.92   39.92
   3 -11  12  226.89   39.21
  -3  11 -13    8.59   14.15
   3 -11  13   47.51   24.02
  -3  11 -13   16.77   12.62
  -3  11 -13   25.83   18.31
  -3  11 -14   51.58   28.20
   3 -11  14   60.67   19.93
  -3  11 -14   57.25   19.87
  -3  11 -14   50.43   26.43
  -3  11 -15   30.26   18.02
   3 -11  15   35.19   19.95
  -3  11 -15   54.79   23.88
  -3  11 -15    5.14   10.58
  -3  11 -16   33.62   17.19
   3 -11  16   -3.27    8.25
  -3  11 -16   10.85    9.94
  -3  11 -16   30.36   16.35
  -3  11 -17   12.52    8.95
   3 -11  17   11.49   10.38
  -3  11 -17   -0.57    8.77
  -3  11 -17   25.94   15.87
  -3  11 -18   18.70   11.22
   3 -11  18   11.26   10.12
  -3  11 -18  -14.48    7.38
  -3  11 -18    0.12    5.72
  -3  11 -19    6.25    7.62
   3 -10 -13   12.70   11.42
   3 -10 -12   16.65   10.00
   3 -10 -12   13.74    6.76
  -3  10  11   20.03   14.87
   3 -10 -11   -2.89    5.86
   3 -10 -11  -25.51    9.37
  -3  10  10   46.46   23.91
   3 -10 -10   60.34   20.60
   3 -10 -10   63.83   23.93
  -3  10   9  -23.53   14.77
   3 -10  -9    3.18    4.48
   3 -10  -9   14.51   11.09
  -3  10   8    2.04    7.98
   3 -10  -8    6.01    6.31
   3 -10  -8   21.60   16.30
  -3  10   7   15.21   14.24
   3 -10  -7   35.54   18.70
   3 -10  -7   36.18   19.07
  -3  10   6   66.98   30.73
   3 -10  -6   35.30   14.37
   3 -10  -6   45.91   15.30
  -3  10   5   -9.89   12.82
  -3  10   5   -5.39   11.41
   3 -10  -5    1.55    3.06
   3 -10  -5    8.90    8.64
  -3  10   4   95.05   27.13
  -3  10   4   93.43   23.53
   3 -10  -4   51.08   19.90
   3 -10  -4   71.19   28.12
  -3  10   3   34.19   16.43
  -3  10   3   78.95   29.73
   3 -10  -3   24.01   12.43
   3 -10  -3   72.04   26.08
  -3  10   2   83.38   25.82
  -3  10   2   80.80   22.44
   3 -10  -2   59.87   21.15
   3 -10  -2   87.41   25.91
  -3  10   1   99.27   33.96
  -3  10   1  136.84   32.54
   3 -10  -1  147.55   34.59
  -3  10   0   38.35   14.82
  -3  10   0   48.13   17.40
   3 -10   0   24.32   10.99
   3 -10   0   64.29   17.11
  -3  10  -1   25.12   12.62
  -3  10  -1   14.93    9.85
   3 -10   1   12.17    8.93
   3 -10   1   -2.49    8.78
  -3  10  -2   51.89   20.20
  -3  10  -2   39.46   14.32
   3 -10   2   36.07   13.08
   3 -10   2   26.74   12.65
  -3  10  -3   73.20   21.44
   3 -10   3   89.08   22.66
  -3  10  -3   64.39   17.82
   3 -10   3   49.61   16.51
   3 -10   3   83.76   20.06
  -3  10  -4   49.36   17.94
   3 -10   4   29.79   14.79
  -3  10  -4   38.95   18.23
   3 -10   4   17.54   10.32
   3 -10   4   60.49   20.96
  -3  10  -5   22.26   11.13
   3 -10   5   26.87   12.64
  -3  10  -5   26.59   12.99
   3 -10   5   22.54   10.91
  -3  10  -6   91.11   22.71
   3 -10   6   38.11   15.28
  -3  10  -6   38.12   13.16
   3 -10   6   48.66   17.09
  -3  10  -7    9.82    8.19
   3 -10   7   41.61   17.36
  -3  10  -7   42.50   42.43
   3 -10   7   70.18   24.90
  -3  10  -8   17.11    9.71
   3 -10   8   25.15   14.73
  -3  10  -8   -0.49    7.87
  -3  10  -8  -14.47   11.77
   3 -10   8   10.13    7.28
  -3  10  -9  160.33   23.60
   3 -10   9  149.81   35.44
  -3  10  -9  135.34   32.00
  -3  10  -9  145.89   33.41
   3 -10   9  128.28   29.97
  -3  10 -10   -8.81    8.98
   3 -10  10  -15.17    9.88
  -3  10 -10   12.26   10.49
  -3  10 -10   49.60   49.18
   3 -10  10    3.03    6.46
  -3  10 -11  -14.04   10.10
   3 -10  11   30.81   15.94
  -3  10 -11    6.13    8.30
  -3  10 -11   -1.57   12.12
   3 -10  11    5.83    6.28
  -3  10 -12   49.12   16.17
   3 -10  12   43.09   18.75
  -3  10 -12   44.76   14.25
  -3  10 -12   72.57   21.97
   3 -10  12   53.46   16.76
  -3  10 -13    7.84    8.44
   3 -10  13   10.48   10.69
  -3  10 -13    0.34    6.81
  -3  10 -13   27.02   17.01
  -3  10 -14    7.44    9.09
   3 -10  14   15.30   12.31
  -3  10 -14   30.78   14.29
  -3  10 -14   15.21   13.12
  -3  10 -15   45.16   22.90
   3 -10  15   18.14   13.16
  -3  10 -15   35.01   17.52
  -3  10 -15   20.96   15.68
  -3  10 -16   -8.46   10.94
   3 -10  16   -4.63    8.40
  -3  10 -16   21.31   14.12
  -3  10 -16  -16.06   12.82
  -3  10 -17   42.46   18.04
   3 -10  17   44.34   17.63
  -3  10 -17   44.18   17.16
  -3  10 -17   26.78   16.15
  -3  10 -18   32.11   17.23
   3 -10  18   30.80   18.55
  -3  10 -18   25.88   12.97
  -3  10 -18   49.48   25.66
  -3  10 -19   -4.67    6.68
   3  -9 -14    7.42    8.85
  -3   9  13    1.44    6.06
   3  -9 -13    2.95    4.42
   3  -9 -13   -4.52    7.50
  -3   9  12   -3.45   10.31
   3  -9 -12   20.02   13.28
   3  -9 -12   12.10   10.23
  -3   9  11   38.69   21.83
   3  -9 -11    4.47    5.72
   3  -9 -11   11.25   11.45
  -3   9  10   28.11   15.23
   3  -9 -10   14.77   11.69
   3  -9 -10    7.25    7.43
  -3   9   9   65.13   27.39
  -3   9   9   17.22   11.97
   3  -9  -9   30.69   13.76
   3  -9  -9    0.00   11.12
  -3   9   8   72.81   24.54
   3  -9  -8   45.70   17.63
   3  -9  -8   80.87   29.60
  -3   9   7   52.97   22.56
   3  -9  -7   26.31   11.75
   3  -9  -7   20.38   12.02
  -3   9   6   30.64   17.82
   3  -9  -6   11.13    9.20
   3  -9  -6   -1.83    9.69
  -3   9   5   84.53   23.93
  -3   9   5   77.37   28.34
   3  -9  -5    9.90    8.07
   3  -9  -5   48.32   17.93
  -3   9   4  120.11   31.84
  -3   9   4  112.82   32.62
   3  -9  -4  109.91   30.30
   3  -9  -4   98.15   27.52
  -3   9   3   18.41   11.43
  -3   9   3   11.14    9.19
   3  -9  -3   15.24    7.77
   3  -9  -3   -1.31    9.20
  -3   9   2   -2.50   12.67
  -3   9   2   22.24   11.00
   3  -9  -2   19.87   10.44
  -3   9   1   74.51   20.05
  -3   9   1  110.70   26.19
   3  -9  -1   80.13   20.30
  -3   9   0  128.96   28.43
  -3   9   0  159.34   34.34
   3  -9   0  162.27   30.93
  -3   9  -1  171.96   42.01
   3  -9   1  206.61   37.17
  -3   9  -1  246.82   48.57
   3  -9   1  166.25   31.26
   3  -9   1  233.21   38.99
  -3   9  -2  254.68   53.83
   3  -9   2  283.78   55.20
  -3   9  -2  257.66   51.63
   3  -9   2  229.82   43.72
   3  -9   2  322.68   39.83
  -3   9  -3    8.69    5.43
  -3   9  -3   40.14   16.12
   3  -9   3   30.80   13.04
   3  -9   3   45.90   17.52
  -3   9  -4  991.31   50.82
   3  -9   4 1019.26   52.42
  -3   9  -4 1003.50   50.02
   3  -9   4  893.92   52.31
  -3   9  -5   10.02    8.77
   3  -9   5   -9.08   10.31
  -3   9  -5   -7.66    7.58
  -3   9  -6   86.53   20.72
   3  -9   6   69.11   18.39
  -3   9  -6   83.93   20.54
  -3   9  -7  417.61   49.67
   3  -9   7  438.09   49.74
  -3   9  -7  432.21   50.34
  -3   9  -8   21.49   10.53
   3  -9   8   -1.11    9.53
  -3   9  -8    7.07    5.99
  -3   9  -8   16.40   11.19
  -3   9  -9   10.97   10.08
   3  -9   9   -1.80   10.38
  -3   9  -9    1.89    4.41
  -3   9  -9    3.35    7.12
  -3   9 -10  273.06   40.22
   3  -9  10  251.23   35.50
  -3   9 -10  243.13   37.97
  -3   9 -10  244.98   29.61
  -3   9 -11   18.04   12.39
   3  -9  11   36.03   14.17
  -3   9 -11   33.41   32.29
  -3   9 -11   33.03   15.04
  -3   9 -12   15.00    9.92
   3  -9  12   22.03   13.24
  -3   9 -12   17.80   11.24
  -3   9 -12   45.16   17.79
   3  -9  12    9.80    6.86
  -3   9 -13   11.14    9.26
   3  -9  13   18.45   13.05
  -3   9 -13   19.54   13.57
  -3   9 -13   38.59   15.01
   3  -9  14   14.87   10.81
  -3   9 -14   18.22   10.78
  -3   9 -14  -18.60   13.05
   3  -9  15   32.17   16.85
  -3   9 -15   40.89   20.16
  -3   9 -15   55.73   18.57
   3  -9  16   19.14    8.83
  -3   9 -16   -2.31    7.87
  -3   9 -16   17.27    9.60
   3  -9  17    8.24    8.56
  -3   9 -17  -10.92    8.33
  -3   9 -17  -22.40   12.56
   3  -9  18   -1.49    6.53
  -3   9 -18    9.05    9.28
  -3   9 -18    6.88    9.22
  -3   9 -19    8.23    9.75
  -3   9 -19   14.86   11.47
   3  -8 -15   -0.42    5.97
   3  -8 -14   23.47   12.42
  -3   8  13   12.41   11.50
   3  -8 -13  -12.97    7.58
   3  -8 -13   -8.36    7.61
  -3   8  12   10.22    9.70
   3  -8 -12   19.15   12.14
   3  -8 -12   -5.42    7.98
  -3   8  11   16.77   12.67
   3  -8 -11  -16.28    7.06
   3  -8 -11  -13.47    8.20
  -3   8  10  -19.99   12.69
   3  -8 -10  -12.95    7.38
   3  -8 -10   20.79   14.10
  -3   8   9   -5.17   11.47
  -3   8   9    3.49    4.86
   3  -8  -9    5.36    6.68
   3  -8  -9   -0.57    9.23
  -3   8   8   20.49   12.99
   3  -8  -8   16.78   10.80
   3  -8  -8    9.99    7.86
  -3   8   7   53.78   24.77
   3  -8  -7  106.18   27.71
   3  -8  -7   80.91   20.36
  -3   8   6   14.74   14.86
   3  -8  -6    5.78    6.36
   3  -8  -6   13.63    9.94
  -3   8   5  205.29  205.25
  -3   8   5  203.51   48.87
   3  -8  -5  222.30   27.32
   3  -8  -5  169.25   38.92
  -3   8   4   31.37   26.76
  -3   8   4   37.80   14.74
   3  -8  -4   24.51   11.50
   3  -8  -4   18.78   10.98
  -3   8   3   15.99    9.38
  -3   8   3   -1.34    9.79
   3  -8  -3    5.23    4.36
   3  -8  -3   17.11    9.97
  -3   8   2   63.39   18.97
  -3   8   2   74.22   19.43
   3  -8  -2  111.71   23.52
  -3   8   1   -2.92   10.88
  -3   8   1   45.82   14.59
   3  -8  -1   15.90    6.82
  -3   8   0  117.31   27.68
   3  -8   0  148.12   24.04
  -3   8   0  132.11   26.79
   3  -8   0  169.41   30.59
  -3   8  -1   15.32    9.18
   3  -8   1    4.47    9.18
  -3   8  -1   -3.87    6.81
   3  -8   1    6.09    5.82
  -3   8  -2  173.52   29.66
   3  -8   2  217.85   32.53
  -3   8  -2  190.10   33.14
   3  -8   2  158.91   22.27
  -3   8  -3  107.43   20.92
   3  -8   3   98.73   20.86
  -3   8  -3   90.17   18.74
   3  -8   3   80.30   27.85
  -3   8  -4   60.66   15.96
   3  -8   4   40.76   10.83
  -3   8  -4   58.17   14.90
   3  -8   4   42.84   10.48
  -3   8  -5  168.64   28.38
   3  -8   5  133.15   24.51
  -3   8  -5  159.47   34.05
   3  -8   5  141.30   23.47
  -3   8  -6  116.49   28.63
   3  -8   6  106.19   19.43
  -3   8  -6   87.14   16.87
  -3   8  -6   79.10   28.85
  -3   8  -7   53.40   13.05
   3  -8   7   42.72   16.76
  -3   8  -7   62.26   16.59
  -3   8  -7   74.74   18.79
  -3   8  -8    2.26    4.74
   3  -8   8    6.19    4.63
  -3   8  -8   11.17    8.37
  -3   8  -8   11.61    7.11
  -3   8  -9  256.82   38.33
   3  -8   9  247.97   27.85
  -3   8  -9  238.44   29.94
  -3   8  -9  239.37   30.84
  -3   8 -10  270.10   44.59
   3  -8  10  322.44   36.51
  -3   8 -10  298.40   37.96
  -3   8 -10  261.47   29.95
   3  -8  11   13.61    8.66
  -3   8 -11   15.88   10.01
  -3   8 -11   23.59   12.75
   3  -8  11    4.94    3.13
   3  -8  12   48.58   18.61
  -3   8 -12   30.82   14.24
  -3   8 -12   60.91   24.12
   3  -8  13  183.27   29.93
  -3   8 -13  147.98   26.04
  -3   8 -13  191.50   30.49
   3  -8  14    5.28    8.19
  -3   8 -14   -1.93    8.38
  -3   8 -14   13.46   11.28
   3  -8  15   25.93   18.10
  -3   8 -15    2.78    4.59
  -3   8 -15   28.85   14.12
   3  -8  16   18.87   14.06
  -3   8 -16   16.96    7.23
  -3   8 -16   32.05   18.18
   3  -8  17   25.07   15.04
  -3   8 -17   22.78   19.10
  -3   8 -17   43.91   20.75
  -3   8 -18    9.51    9.88
  -3   8 -18   15.06   14.48
  -3   8 -19   -0.95    6.45
   3  -7 -15   -2.31    7.46
   3  -7 -14    7.75    8.80
  -3   7  13   22.77   16.57
   3  -7 -13   14.12   12.25
   3  -7 -13   30.24   17.19
  -3   7  12    3.97    6.34
   3  -7 -12   63.96   31.07
   3  -7 -12   11.74   10.85
  -3   7  11   17.05   12.89
   3  -7 -11  -10.61    7.67
   3  -7 -11    3.44    4.44
  -3   7  10    7.35    9.83
   3  -7 -10    8.88    8.02
   3  -7 -10    4.54    5.68
  -3   7   9   19.77   13.64
  -3   7   9    6.35    6.24
   3  -7  -9   23.65   12.95
   3  -7  -9  -17.63    8.66
  -3   7   8   26.80   15.39
   3  -7  -8   25.68   11.56
   3  -7  -8   14.38   11.40
  -3   7   7   -4.82   15.91
  -3   7   7    8.91    6.63
   3  -7  -7   16.61   10.15
   3  -7  -7   28.58   11.96
  -3   7   6   -6.67   14.04
  -3   7   6    8.53    6.15
   3  -7  -6   20.38   10.80
   3  -7  -6   20.79   11.44
  -3   7   5  210.52   53.91
  -3   7   5  216.04  175.95
  -3   7   5  188.65   48.89
   3  -7  -5  247.62   24.36
   3  -7  -5  253.59   26.09
  -3   7   4   40.46   16.68
  -3   7   4    9.60    6.45
  -3   7   4   29.91   13.47
   3  -7  -4   32.10   11.86
   3  -7  -4   58.83   16.36
  -3   7   3   32.91   14.07
  -3   7   3   21.64    7.19
  -3   7   3   20.74    8.53
   3  -7  -3   16.36    8.31
  -3   7   2  348.42   52.32
  -3   7   2  378.64   31.19
  -3   7   2  395.08   27.71
   3  -7  -2  437.76   30.88
  -3   7   1  235.62   33.52
   3  -7  -1  181.93   26.49
  -3   7   1  180.51   17.18
  -3   7   1  201.31   29.26
  -3   7   0  352.25  196.77
   3  -7   0  402.66   45.46
  -3   7   0  350.14  191.52
  -3   7   0  339.61   30.66
  -3   7  -1  746.28   43.69
   3  -7   1  746.73   31.42
  -3   7  -1  761.69   31.50
  -3   7  -1  800.22   40.18
   3  -7   1  716.04   29.87
   3  -7   1  754.33   32.22
  -3   7  -2  361.48   44.40
   3  -7   2  396.40   40.74
  -3   7  -2  242.03   31.77
  -3   7  -2  337.80   30.74
   3  -7   2  286.51   36.93
   3  -7   2  309.90   41.97
  -3   7  -3  187.65   28.64
   3  -7   3  143.68   29.15
  -3   7  -3  154.05   85.56
   3  -7   3  157.45   18.43
   3  -7   3  148.68   25.95
  -3   7  -4  445.86   21.46
   3  -7   4  431.13   26.37
  -3   7  -4  407.26   27.71
   3  -7   4  376.38   21.41
   3  -7   4  356.47  197.57
  -3   7  -5  173.37   29.59
   3  -7   5  135.72   26.42
  -3   7  -5  126.93   26.81
   3  -7   5  109.88   19.51
  -3   7  -5  164.16   24.40
   3  -7   5  157.67   22.72
  -3   7  -6   72.56   18.60
   3  -7   6   56.40   13.83
  -3   7  -6   44.74   11.35
  -3   7  -6   26.06   12.36
  -3   7  -7   62.99   16.54
   3  -7   7   68.35   17.16
  -3   7  -7   56.78   15.14
  -3   7  -7   49.66   12.84
  -3   7  -8  185.66   32.20
   3  -7   8  199.05   33.25
  -3   7  -8  161.78  119.72
  -3   7  -8  160.75  118.89
  -3   7  -9   -6.50    7.65
   3  -7   9    7.30    7.05
  -3   7  -9   15.41   10.68
  -3   7  -9    4.89    6.48
   3  -7  10    6.31    6.02
  -3   7 -10   -0.79    6.98
  -3   7 -10   37.78   18.66
   3  -7  10    9.18    6.91
   3  -7  11   -4.09    8.65
  -3   7 -11    4.51    6.09
  -3   7 -11   -9.60   13.86
   3  -7  11   14.98    9.04
   3  -7  12   76.79   19.19
  -3   7 -12   64.78   24.55
  -3   7 -12   37.44   15.89
   3  -7  13   11.77    8.71
  -3   7 -13   -5.31    8.19
  -3   7 -13   -0.28   13.15
   3  -7  14   68.39   22.92
  -3   7 -14   72.00   24.33
  -3   7 -14  124.61   23.99
   3  -7  15  138.15   33.07
  -3   7 -15  107.15   22.76
  -3   7 -15  190.96   36.95
   3  -7  16   11.67   11.36
  -3   7 -16    7.18    8.04
  -3   7 -16  -27.06   13.81
   3  -7  17   43.08   19.69
  -3   7 -17   -4.96    8.09
  -3   7 -17   -2.01   14.63
  -3   7 -18   37.14   18.27
  -3   7 -18   61.16   33.65
  -3   7 -19   12.73   11.12
   3  -6 -16   11.44   10.93
   3  -6 -15   -9.66    8.16
   3  -6 -14   27.08   16.26
   3  -6 -14   -2.64    5.13
  -3   6  13   27.39   15.54
   3  -6 -13   11.44    9.89
   3  -6 -13    9.55    8.37
  -3   6  12   -3.65    6.66
   3  -6 -12   36.84   16.53
   3  -6 -12   25.15   17.10
  -3   6  11   11.11   12.82
   3  -6 -11   28.14   14.93
   3  -6 -11   -0.53    7.43
  -3   6  10   95.79   27.96
  -3   6  10   22.84   13.46
   3  -6 -10   47.32   17.53
   3  -6 -10   61.94   21.65
  -3   6   9   54.70   21.96
  -3   6   9   26.32   11.81
   3  -6  -9   46.26   17.10
   3  -6  -9   23.75   11.91
  -3   6   8   48.75   15.73
  -3   6   8   18.04   10.89
   3  -6  -8   16.59   10.79
   3  -6  -8   28.67   11.61
  -3   6   7  337.86   38.68
  -3   6   7  317.62   13.91
   3  -6  -7  284.56   40.35
   3  -6  -7  315.11   35.05
  -3   6   6    8.51    7.39
  -3   6   6    6.33    3.59
   3  -6  -6    8.60    5.94
   3  -6  -6   -7.17    7.29
  -3   6   5  180.47   34.24
  -3   6   5  136.41   32.28
   3  -6  -5  242.11   43.51
   3  -6  -5  242.77   41.56
  -3   6   4   79.85   29.05
  -3   6   4   61.21   14.07
  -3   6   4   78.39   27.70
   3  -6  -4   82.40   15.56
   3  -6  -4   58.75   16.60
  -3   6   3   38.77   11.18
  -3   6   3   13.04    5.06
  -3   6   3   18.60    7.98
   3  -6  -3   11.16    5.68
  -3   6   2   70.50   18.51
   3  -6  -2   56.29   15.20
  -3   6   2   60.29   13.01
  -3   6   2   78.62   15.25
  -3   6   1  176.20   30.87
   3  -6  -1  137.32   21.49
   3  -6  -1  178.01   22.57
  -3   6   1  159.44   18.41
  -3   6   1  183.82   24.75
   3  -6  -1  119.01   17.06
  -3   6   0  723.21   30.38
   3  -6   0  691.10   24.06
   3  -6   0  703.75   22.59
  -3   6   0  715.04   22.09
  -3   6   0  696.82   22.63
   3  -6   0  701.15   22.03
  -3   6  -1 1074.83   34.91
   3  -6   1 1097.84   33.13
   3  -6   1 1108.89   35.58
  -3   6  -1 1071.40   32.05
  -3   6  -1 1112.99   33.42
   3  -6   1 1103.18   32.99
   3  -6   1 1087.43   34.56
  -3   6  -2  113.44   16.76
   3  -6   2   96.75   14.45
   3  -6   2  113.44   15.69
  -3   6  -2   81.02   49.25
  -3   6  -2  106.11   16.17
   3  -6   2   87.42   11.42
   3  -6   2   99.28   13.81
  -3   6  -3  966.54   31.15
   3  -6   3  933.74   46.80
  -3   6  -3  932.59   36.09
  -3   6  -3  993.37   29.92
   3  -6   3  972.20   29.39
   3  -6   3  984.05   30.40
  -3   6  -4  244.25   44.50
   3  -6   4  244.32   36.56
  -3   6  -4  211.32   25.66
  -3   6  -4  249.49   22.48
   3  -6   4  219.00   28.29
  -3   6  -4  276.36   43.47
   3  -6   4  273.64   23.32
  -3   6  -5   17.66   10.12
   3  -6   5    9.60    5.64
  -3   6  -5    7.84    5.60
   3  -6   5    4.93    3.63
  -3   6  -5   -5.33   10.64
   3  -6   5    8.48    4.59
  -3   6  -6  133.59   26.97
   3  -6   6  124.42   23.03
  -3   6  -6  117.95   20.55
   3  -6   6   89.29   17.36
  -3   6  -6  100.40   18.83
   3  -6   6   81.79   13.82
  -3   6  -7  113.89   23.04
   3  -6   7  105.41   21.39
  -3   6  -7   92.34   17.79
   3  -6   7   75.93   20.32
  -3   6  -7   85.19   16.19
   3  -6   8  253.08   35.52
  -3   6  -8  205.73   32.24
  -3   6  -8  224.48   35.56
   3  -6   9   51.86   13.44
  -3   6  -9   59.29   14.51
  -3   6  -9   63.67   17.14
   3  -6   9   36.84   15.64
   3  -6  10   33.38   12.58
  -3   6 -10   28.20   12.97
  -3   6 -10   29.30   14.58
   3  -6  10   18.92    8.72
   3  -6  11  409.72   49.32
  -3   6 -11  408.31   50.11
  -3   6 -11  337.73   36.91
   3  -6  11  267.60   28.60
   3  -6  12  147.39   18.37
  -3   6 -12  102.70   24.53
  -3   6 -12   58.15   22.61
   3  -6  13   41.57   17.76
  -3   6 -13   20.35   11.67
  -3   6 -13   39.53   16.37
   3  -6  14   78.18   20.03
  -3   6 -14   64.70   21.43
  -3   6 -14   76.71   25.75
   3  -6  15  140.54   27.91
  -3   6 -15   97.92   25.15
  -3   6 -15   87.22   22.32
   3  -6  16    5.18    6.94
  -3   6 -16   36.14   20.13
  -3   6 -16   15.63   17.88
   3  -6  17    6.92    6.79
  -3   6 -17   -1.15    7.40
  -3   6 -17   27.96   17.42
  -3   6 -18   14.11    7.23
  -3   6 -18   36.10   20.65
  -3   6 -19    8.69    8.52
   3  -5 -16   19.91   11.78
   3  -5 -15   26.43   15.85
   3  -5 -14    6.11    9.74
   3  -5 -14   11.18   10.64
  -3   5  13   18.73   15.13
   3  -5 -13    7.71    8.72
   3  -5 -13   -5.37    7.43
  -3   5  12   38.19   19.12
   3  -5 -12   25.79   13.97
   3  -5 -12   21.61   13.73
  -3   5  11  155.54   27.45
   3  -5 -11  100.59   26.13
   3  -5 -11  117.94   30.72
  -3   5  10   54.39   22.98
  -3   5  10   12.24    9.51
   3  -5 -10   47.90   17.39
   3  -5 -10   15.32   12.26
  -3   5   9  119.09   29.59
  -3   5   9   81.64   30.47
  -3   5   9  111.72   23.24
   3  -5  -9  116.42   27.46
   3  -5  -9  109.31   25.84
  -3   5   8   27.96   13.52
  -3   5   8   21.11    9.79
  -3   5   8   16.49   10.10
   3  -5  -8   37.95   13.07
   3  -5  -8   30.13   14.65
  -3   5   7  223.19   45.35
  -3   5   7  155.77   30.04
   3  -5  -7  178.08   34.71
   3  -5  -7  172.82   28.80
  -3   5   6  878.05   60.68
  -3   5   6  917.35   59.37
   3  -5  -6  921.48   60.90
   3  -5  -6  933.14   66.42
  -3   5   5  134.63   28.79
  -3   5   5  142.48   16.81
   3  -5  -5  108.60   20.52
   3  -5  -5   93.91   18.12
  -3   5   4  109.90   23.83
   3  -5  -4  109.14   20.01
  -3   5   4  154.70   85.11
  -3   5   4  144.86   27.02
   3  -5  -4  122.36   22.86
  -3   5   3  351.80   51.46
   3  -5  -3  260.48  160.64
  -3   5   3  329.80   11.55
  -3   5   3  347.37   43.34
   3  -5  -3  322.19   12.32
  -3   5   2  589.59   77.72
   3  -5  -2  623.56   25.08
   3  -5  -2  606.23   19.99
  -3   5   2  602.31   18.37
  -3   5   2  599.96   36.23
   3  -5  -2  630.39   27.47
  -3   5   1    5.88    7.33
   3  -5  -1    5.33    4.00
   3  -5  -1   -4.91    6.16
  -3   5   1   -7.97    3.83
  -3   5   1   -1.84    7.18
   3  -5  -1   -3.89    5.48
  -3   5   0  107.40   20.35
   3  -5   0  122.33   56.30
   3  -5   0  134.34   16.77
  -3   5   0  140.50   12.43
  -3   5   0  149.84   18.35
   3  -5   0  116.30   18.52
  -3   5  -1   78.08   16.36
   3  -5   1  106.65   17.59
   3  -5   1   90.87   17.28
  -3   5  -1   95.19   15.12
  -3   5  -1   92.24   16.74
   3  -5   1   95.48   15.92
   3  -5   1  112.11   18.31
  -3   5  -2  348.47  156.25
   3  -5   2  410.59   12.97
   3  -5   2  380.36   13.90
  -3   5  -2  383.60   25.54
  -3   5  -2  389.91   12.25
   3  -5   2  400.59   12.97
   3  -5   2  436.79   35.59
  -3   5  -3  484.87   17.39
   3  -5   3  457.05   19.44
  -3   5  -3  417.80   33.12
  -3   5  -3  438.45   18.26
   3  -5   3  457.75   13.34
   3  -5   3  462.39   33.41
  -3   5  -4  132.02   18.47
   3  -5   4  112.92   25.03
  -3   5  -4  122.20   55.64
  -3   5  -4  128.86   16.58
   3  -5   4  146.45   19.30
  -3   5  -4  144.11   22.63
   3  -5   4  126.16   13.95
  -3   5  -5   45.64   11.86
   3  -5   5   54.33   11.93
  -3   5  -5   44.46   10.18
  -3   5  -5   49.50   10.86
   3  -5   5   25.74    5.69
  -3   5  -5   45.16   13.02
   3  -5   5   35.84    8.84
  -3   5  -6  462.84   25.48
   3  -5   6  487.44   22.61
  -3   5  -6  418.64   13.85
  -3   5  -6  453.26   15.94
   3  -5   6  448.35   14.30
  -3   5  -6  456.16   58.63
   3  -5   6  380.28   35.26
   3  -5   7  103.76   20.83
  -3   5  -7   95.15   17.32
  -3   5  -7  127.11   25.97
   3  -5   8   -1.81    8.21
  -3   5  -8   13.60    5.16
  -3   5  -8   15.01    9.79
   3  -5   8    0.49    3.68
   3  -5   9 1975.71   95.81
  -3   5  -9 2087.72 1528.97
  -3   5  -9 1971.77   96.69
   3  -5   9 2083.64 1526.01
   3  -5  10   19.42    9.75
  -3   5 -10   16.29   10.98
  -3   5 -10    9.95    9.24
   3  -5  10   12.82    7.97
   3  -5  11    3.83    4.96
  -3   5 -11   37.76   16.59
  -3   5 -11   16.92   10.30
   3  -5  11   14.44   14.76
   3  -5  12   91.92   20.69
  -3   5 -12  100.33   23.63
  -3   5 -12  118.52   27.13
   3  -5  12   67.55   23.70
   3  -5  13   10.20    7.86
  -3   5 -13  -12.08    7.57
  -3   5 -13   -3.03   11.40
   3  -5  14   18.65   13.98
  -3   5 -14   27.59   12.94
  -3   5 -14   15.22   11.98
   3  -5  15    2.70    6.59
  -3   5 -15   22.22   16.21
  -3   5 -15   26.72   19.25
   3  -5  16   26.83   13.92
  -3   5 -16    8.54    8.28
  -3   5 -16  -10.90   12.52
   3  -5  17    5.14    6.06
  -3   5 -17    9.14    8.40
  -3   5 -17   16.77   10.82
  -3   5 -18   19.73   11.64
  -3   5 -18    6.96   13.06
  -3   5 -19    9.84    9.38
   3  -4 -17   -1.27    8.23
   3  -4 -16    4.06    6.93
   3  -4 -15   27.84   17.41
   3  -4 -14    6.83    7.93
   3  -4 -14    8.74    7.55
  -3   4  13   -2.07   13.38
   3  -4 -13   18.38   12.20
   3  -4 -13   24.31   16.85
  -3   4  12   -4.36   13.21
   3  -4 -12  -12.27    8.23
   3  -4 -12   16.69   12.07
  -3   4  11    8.66   11.80
   3  -4 -11   11.62    9.28
   3  -4 -11    4.78    6.09
  -3   4  10   12.24   10.01
   3  -4 -10   23.37   13.95
   3  -4 -10   21.04   12.20
  -3   4   9   57.76   23.30
  -3   4   9   22.71   11.65
  -3   4   9   23.18   11.68
   3  -4  -9   31.90   14.39
   3  -4  -9   39.85   17.22
  -3   4   8   73.94   20.53
  -3   4   8   68.28   16.59
  -3   4   8   47.45   18.84
   3  -4  -8   82.31   19.67
   3  -4  -8   76.52   19.71
  -3   4   7  148.06   25.64
  -3   4   7  129.71   24.08
   3  -4  -7  167.58   25.46
   3  -4  -7  125.09   21.54
  -3   4   6  231.91   44.14
  -3   4   6  270.79   89.17
   3  -4  -6  277.24   98.64
   3  -4  -6  283.70   95.88
  -3   4   5  177.40   32.86
   3  -4  -5  207.47   34.94
  -3   4   5  230.48   22.18
   3  -4  -5  224.92   33.84
   3  -4  -5  214.03   30.66
  -3   4   4   51.78   14.54
   3  -4  -4   27.16    9.35
  -3   4   4   31.85    6.69
   3  -4  -4   24.96    6.76
  -3   4   3  267.71   41.36
   3  -4  -3  315.32   38.65
   3  -4  -3  364.94   20.97
  -3   4   3  319.87   14.05
  -3   4   3  350.38  157.31
   3  -4  -3  337.44  151.09
  -3   4   2  -22.14   14.44
   3  -4  -2   -2.75    7.93
   3  -4  -2    4.11    3.88
  -3   4   2    8.33    3.87
   3  -4  -2   12.02    5.56
  -3   4   1 1824.81   48.24
   3  -4  -1 1802.88   46.26
   3  -4  -1 1780.67   43.20
  -3   4   1 1806.99   43.78
  -3   4   1 1772.74   43.59
   3  -4  -1 1859.44   45.80
  -3   4   0 1052.60   31.83
   3  -4   0 1053.20   18.61
  -3   4   0 1061.54   26.73
  -3   4   0 1030.90   27.04
   3  -4   0 1056.08   26.49
   3  -4   1  765.39  271.12
   3  -4   1  818.60   38.55
  -3   4  -1  772.36   13.80
  -3   4  -1  753.26  266.79
   3  -4   1  754.30  267.12
   3  -4   1  839.55   49.15
  -3   4  -2  193.30   25.31
   3  -4   2  193.56   20.91
   3  -4   2  181.44   28.41
  -3   4  -2  188.92   18.63
  -3   4  -2  216.74   25.56
   3  -4   2  198.88   24.34
   3  -4   2  202.78   20.86
  -3   4  -3   75.22   13.29
   3  -4   3   91.50   16.42
  -3   4  -3   80.83   12.82
  -3   4  -3   74.97   13.83
   3  -4   3   81.63   15.32
  -3   4  -3   96.90   24.07
   3  -4   3   91.62   14.26
  -3   4  -4   37.98    7.23
   3  -4   4   48.20    8.97
  -3   4  -4   27.47   10.41
  -3   4  -4   43.43    8.61
   3  -4   4   53.21    9.77
  -3   4  -4   36.69    8.92
   3  -4   4   46.68    9.10
  -3   4  -5  113.60   20.04
   3  -4   5  120.42   21.64
  -3   4  -5   80.74   12.74
  -3   4  -5   97.91   17.25
   3  -4   5  104.95   17.12
  -3   4  -5  117.76   23.86
   3  -4   5  104.01   16.48
  -3   4  -6  103.48   15.21
   3  -4   6   69.85   16.53
  -3   4  -6   59.67   12.61
  -3   4  -6   97.97   13.46
  -3   4  -6  102.95   14.82
   3  -4   6   60.76   13.53
   3  -4   7   11.34    5.69
  -3   4  -7    6.78    4.88
  -3   4  -7   12.83    5.94
  -3   4  -7   30.85    9.27
   3  -4   7    1.38    4.02
   3  -4   8   16.53    7.71
  -3   4  -8   13.05    5.20
  -3   4  -8   12.04    9.93
   3  -4   9   42.79   16.82
  -3   4  -9   47.26   17.93
  -3   4  -9   28.68   11.39
   3  -4   9   33.78   13.47
   3  -4  10   22.60   10.29
  -3   4 -10   13.93    8.20
  -3   4 -10   20.87   11.33
   3  -4  10   23.12   10.23
   3  -4  11   29.27   12.83
  -3   4 -11   28.54   13.98
  -3   4 -11   27.54   11.83
   3  -4  11   15.42    8.26
   3  -4  12  128.63   31.19
  -3   4 -12  113.82   27.50
  -3   4 -12  112.52   31.54
   3  -4  12   63.00   23.32
   3  -4  13    4.33    6.51
  -3   4 -13   26.89   13.27
  -3   4 -13  -14.86   11.44
   3  -4  14   40.78   16.39
  -3   4 -14   23.35   16.01
  -3   4 -14   19.36   14.21
   3  -4  15   51.99   21.17
  -3   4 -15   24.76   20.17
  -3   4 -15   79.23   30.23
   3  -4  16   17.92    7.67
  -3   4 -16   22.27   14.31
  -3   4 -16   32.07   18.37
  -3   4 -17    7.26    7.05
  -3   4 -17   11.69   15.46
  -3   4 -18    9.51    9.87
  -3   4 -18   39.38   19.38
  -3   4 -19   16.60   10.49
   3  -3 -17    8.76    9.91
   3  -3 -16   -0.52    9.71
   3  -3 -15   44.07   19.66
   3  -3 -14   37.63   16.40
   3  -3 -14   23.37   15.97
  -3   3  13  -12.10   15.30
   3  -3 -13    7.74    9.29
   3  -3 -13    7.33    8.40
  -3   3  12   18.30   13.88
   3  -3 -12   42.96   14.90
   3  -3 -12   43.53   20.24
  -3   3  11  473.13   63.87
   3  -3 -11  340.45   67.04
   3  -3 -11  464.71   34.27
  -3   3  10   17.00   10.99
   3  -3 -10   10.88    9.24
   3  -3 -10   -7.88    5.78
  -3   3   9   48.71   17.59
   3  -3  -9   65.21   16.58
   3  -3  -9   38.73   14.09
  -3   3   8  182.47   37.60
   3  -3  -8  164.81   30.41
   3  -3  -8  139.15   27.46
  -3   3   7  173.92   39.09
  -3   3   7  179.05   19.47
  -3   3   7  170.27   19.17
   3  -3  -7  210.57   33.72
   3  -3  -7  184.28   30.53
  -3   3   6   28.73   20.43
  -3   3   6    0.81    1.45
   3  -3  -6   12.07    5.90
   3  -3  -6    5.27    3.97
  -3   3   5  128.90   21.85
   3  -3  -5  112.36   14.93
  -3   3   5  103.96   12.05
   3  -3  -5   91.29   13.69
   3  -3  -5  113.76   15.94
  -3   3   4  294.15   46.60
   3  -3  -4  258.20   30.40
  -3   3   4  279.05   14.83
   3  -3  -4  250.22   25.07
  -3   3   3   91.98   18.57
   3  -3  -3   75.08   14.11
   3  -3  -3   75.76   12.10
  -3   3   3   99.87   14.92
   3  -3  -3   73.91   12.58
  -3   3   2  589.59   34.16
   3  -3  -2  600.86   51.91
   3  -3  -2  578.59   23.82
  -3   3   2  574.61   23.41
  -3   3   2  555.41   24.13
   3  -3  -2  597.49   25.08
  -3   3   1  292.30   48.09
   3  -3  -1  306.39   27.89
   3  -3  -1  248.82   12.51
  -3   3   1  268.82   13.25
  -3   3   1  282.89   17.64
   3  -3  -1  274.44   18.79
  -3   3   0   26.23    9.19
   3  -3   0   27.82    7.24
   3  -3   0   16.17    4.78
  -3   3   0   20.07    4.13
  -3   3   0   32.24    6.90
   3  -3   0   23.91    4.72
  -3   3  -1  364.67   17.68
   3  -3   1  395.13   37.59
   3  -3   1  349.69   21.20
  -3   3  -1  354.83   14.96
  -3   3  -1  364.53   16.16
   3  -3   1  364.93   15.06
   3  -3   1  430.44   38.09
  -3   3  -2  405.80   18.42
   3  -3   2  400.04   17.20
   3  -3   2  410.10   18.23
  -3   3  -2  390.06   17.24
  -3   3  -2  410.26   17.76
   3  -3   2  405.71   16.56
   3  -3   2  449.66   40.91
  -3   3  -3  389.57   31.79
   3  -3   3  384.66   22.77
  -3   3  -3  399.00   19.53
  -3   3  -3  386.11   16.46
   3  -3   3  384.06   15.65
  -3   3  -3  437.59   54.24
   3  -3   3  432.74   37.02
  -3   3  -4 1127.69   28.69
   3  -3   4 1145.06   29.24
  -3   3  -4 1204.55   30.00
  -3   3  -4 1191.35   29.63
   3  -3   4 1173.05   28.68
   3  -3   4 1230.82   31.75
  -3   3  -5   33.16    6.87
   3  -3   5   24.76   10.72
  -3   3  -5   25.42    9.64
  -3   3  -5   17.76    7.07
  -3   3  -5   41.87    8.49
   3  -3   5   34.24    6.50
   3  -3   5   32.56    5.77
   3  -3   6   15.30    8.13
  -3   3  -6   23.40    5.27
  -3   3  -6   23.27    5.88
  -3   3  -6   37.99   11.04
   3  -3   6   30.86    6.98
   3  -3   6   33.76    8.80
   3  -3   7   20.16    9.17
  -3   3  -7   15.20    5.87
  -3   3  -7   19.63    7.50
   3  -3   7   16.97    6.59
   3  -3   8   16.48    6.47
  -3   3  -8   32.08   10.91
  -3   3  -8   24.68   10.15
   3  -3   8   21.85   10.59
   3  -3   9  196.22   36.32
  -3   3  -9  221.87   39.70
  -3   3  -9  221.29   39.81
   3  -3   9  149.98   32.53
   3  -3  10  461.23   24.89
  -3   3 -10  486.65   22.99
  -3   3 -10  465.33   52.59
   3  -3  10  448.70   21.80
   3  -3  11   18.90   11.16
  -3   3 -11   27.61   11.66
  -3   3 -11   41.19   17.11
   3  -3  11   20.23   10.47
   3  -3  12   23.39   11.88
  -3   3 -12   21.07   11.15
  -3   3 -12   31.28   12.99
   3  -3  12   13.58    8.11
   3  -3  13   26.32   12.58
  -3   3 -13   28.62   13.03
  -3   3 -13    5.24    7.67
   3  -3  14  209.87   32.00
  -3   3 -14  128.89   25.21
  -3   3 -14  150.21   25.18
   3  -3  15   22.06   15.24
  -3   3 -15    2.98    4.59
  -3   3 -15  -13.34   12.33
  -3   3 -16    4.14    5.51
  -3   3 -16   10.99   12.51
  -3   3 -17   45.98   20.73
  -3   3 -17   30.73   15.35
  -3   3 -18   -0.23    5.73
  -3   3 -18   15.85   13.57
  -3   3 -19    1.22    3.43
   3  -2 -18   -3.89    8.66
   3  -2 -17   36.18   13.59
   3  -2 -16   26.29   16.14
   3  -2 -15   27.04   14.12
   3  -2 -14   20.38   11.28
   3  -2 -14   15.02    9.93
   3  -2 -13    3.27    5.14
   3  -2 -13   24.88   12.20
  -3   2  12   10.09   12.27
   3  -2 -12   -1.49    4.05
   3  -2 -12   12.63    9.76
  -3   2  11  121.44   30.22
   3  -2 -11  107.54   25.39
   3  -2 -11   80.44   28.18
  -3   2  10   85.22   22.41
   3  -2 -10   56.39   19.33
   3  -2 -10   68.32   21.75
  -3   2   9   18.27   16.97
   3  -2  -9   41.80   16.51
   3  -2  -9   60.86   15.35
  -3   2   8  282.15  104.32
   3  -2  -8  283.72   97.10
   3  -2  -8  245.15   37.80
  -3   2   7  404.72   23.41
   3  -2  -7  420.39   20.21
   3  -2  -7  419.58   24.80
  -3   2   6  188.02   26.54
   3  -2  -6  176.29   30.70
   3  -2  -6  183.00   25.82
   3  -2  -6  189.53   27.22
  -3   2   5  344.49  164.95
   3  -2  -5  337.84  154.94
  -3   2   5  368.79    9.16
   3  -2  -5  347.47  156.45
   3  -2  -5  377.42   42.73
  -3   2   4   -0.67   16.01
   3  -2  -4   15.23    9.45
   3  -2  -4    9.30    3.66
  -3   2   4   10.82    4.16
  -3   2   3  256.07   40.66
   3  -2  -3  181.03   25.35
   3  -2  -3  233.93   20.57
  -3   2   3  242.39   14.57
   3  -2  -3  242.74   28.27
  -3   2   2   12.25   13.73
   3  -2  -2   17.55    7.68
   3  -2  -2   10.22    4.08
  -3   2   2    4.02    2.06
   3  -2  -2    8.17    2.78
  -3   2   1 2258.39   38.49
   3  -2  -1 2252.29   32.90
  -3   2   1 2210.00   31.78
  -3   2   1 2193.72   33.38
   3  -2  -1 2276.90   33.23
  -3   2   0  150.96   23.30
   3  -2   0  166.16   20.27
   3  -2   0  165.08   14.36
  -3   2   0  175.05   20.69
  -3   2   0  150.36   11.71
   3  -2   0  163.15   11.35
  -3   2  -1   59.05   14.13
   3  -2   1   77.01   10.69
   3  -2   1   61.01   13.27
  -3   2  -1   62.01   12.04
  -3   2  -1   83.76   11.15
   3  -2   1   79.32   10.25
   3  -2   1   83.86   11.22
  -3   2  -2  139.24   17.89
   3  -2   2  119.03   22.20
   3  -2   2  100.02   17.60
  -3   2  -2  135.21   16.69
  -3   2  -2  123.64    9.41
   3  -2   2  119.54    9.74
  -3   2  -2  155.76   24.03
   3  -2   2  144.78   21.11
  -3   2  -3  150.37   24.14
   3  -2   3  129.36   20.51
  -3   2  -3  160.11   18.89
  -3   2  -3  131.83    9.81
   3  -2   3  136.40   11.48
  -3   2  -3  149.13   23.88
   3  -2   3  151.67   16.60
  -3   2  -4  151.50   20.85
   3  -2   4  148.72   20.61
  -3   2  -4  153.80   16.24
  -3   2  -4  130.11    7.68
  -3   2  -4  156.04   21.77
   3  -2   4  154.19   21.38
   3  -2   4  170.39   17.77
   3  -2   5 1089.56   27.90
  -3   2  -5 1080.13   36.89
  -3   2  -5 1096.01   27.11
  -3   2  -5 1092.80   32.27
   3  -2   5 1149.08   30.15
   3  -2   5 1125.32   31.58
   3  -2   6  213.58   29.78
  -3   2  -6  205.56   25.09
  -3   2  -6  215.71   16.16
  -3   2  -6  218.66   30.68
   3  -2   6  208.94   26.20
   3  -2   6  233.01   27.49
   3  -2   7   98.40   18.38
  -3   2  -7   78.99   15.28
  -3   2  -7  106.11   18.82
  -3   2  -7  103.36   19.56
   3  -2   7   95.82   18.80
   3  -2   8  246.44   33.49
  -3   2  -8  278.40   95.76
  -3   2  -8  251.32   39.87
   3  -2   8  225.49   31.83
   3  -2   9  333.54   38.19
  -3   2  -9  339.82   18.10
  -3   2  -9  427.48   42.14
   3  -2   9  345.12   18.97
   3  -2  10    8.11    7.23
  -3   2 -10    5.91    5.49
  -3   2 -10   -1.97    9.60
   3  -2  10    1.97    2.53
   3  -2  11   56.38   19.90
  -3   2 -11   85.65   25.48
  -3   2 -11   58.33   21.57
   3  -2  11   35.50   14.79
   3  -2  12   94.49   24.17
  -3   2 -12   93.50   23.22
  -3   2 -12  123.03   31.22
   3  -2  13    8.38    9.45
  -3   2 -13   -0.82    5.57
  -3   2 -13   23.11   13.51
   3  -2  14   85.27   59.40
  -3   2 -14   94.53   19.62
  -3   2 -14  134.42   28.52
   3  -2  15   26.58   17.33
  -3   2 -15   14.95   11.59
  -3   2 -15   50.71   22.32
   3  -2  16    7.55    8.20
  -3   2 -16    7.59    7.70
  -3   2 -16   -7.05   11.67
  -3   2 -17    0.39    5.55
  -3   2 -17   26.54   15.68
  -3   2 -18  -16.23    5.24
   3  -1 -18   22.82   12.68
   3  -1 -17   28.83   15.68
   3  -1 -16   34.00   20.23
   3  -1 -15   -0.14    8.36
   3  -1 -14    8.82    9.18
   3  -1 -13   41.91   15.41
   3  -1 -13   38.33   15.11
   3  -1 -12   37.66   14.71
   3  -1 -12    5.76    4.81
  -3   1  11   87.19   27.64
   3  -1 -11   63.48   22.68
   3  -1 -11   48.69   17.12
  -3   1  10   23.38   12.49
   3  -1 -10   48.68   16.35
   3  -1 -10   36.39   12.65
  -3   1   9   19.91   12.96
   3  -1  -9   16.79   10.18
   3  -1  -9    7.05    4.62
  -3   1   8   17.03    8.00
   3  -1  -8   27.52    9.66
   3  -1  -8    3.94    3.47
  -3   1   7  750.14   35.79
   3  -1  -7  707.54   30.46
  -3   1   6  110.55   21.77
   3  -1  -6  107.23   14.23
   3  -1  -6   66.18   14.53
  -3   1   5  136.25   23.73
   3  -1  -5  116.36   20.41
   3  -1  -5   99.03   17.17
  -3   1   4  474.11   20.40
   3  -1  -4  527.29   52.45
   3  -1  -4  473.85   11.82
  -3   1   4  504.43   13.10
  -3   1   3   51.26   13.06
   3  -1  -3   58.69   12.27
   3  -1  -3   55.54   12.82
  -3   1   3   73.86    8.27
   3  -1  -3   46.67    9.58
  -3   1   2  335.78   20.08
   3  -1  -2  323.18   38.96
   3  -1  -2  313.51   13.06
  -3   1   2  322.08   13.12
   3  -1  -2  330.06   14.11
  -3   1   1   83.17   12.37
   3  -1  -1   51.75   10.86
   3  -1  -1   64.56   14.71
  -3   1   1   68.61    9.44
   3  -1  -1   67.69    9.66
  -3   1   0   -7.90    8.93
   3  -1   0   -2.52    6.26
   3  -1   0    0.97    2.42
  -3   1   0   -2.41    3.79
   3  -1   0    3.21    1.13
  -3   1  -1   93.23   18.49
   3  -1   1   85.02   12.19
   3  -1   1   75.63   11.45
  -3   1  -1   85.04   11.60
  -3   1  -1   79.99    7.79
   3  -1   1   85.52    5.94
   3  -1   1   95.51   12.70
  -3   1  -2  403.26   18.07
   3  -1   2  424.35   17.43
   3  -1   2  399.64   16.99
  -3   1  -2  408.31   16.12
  -3   1  -2  387.95   26.00
   3  -1   2  406.63   20.51
  -3   1  -3   92.51   14.24
   3  -1   3   76.32   11.50
  -3   1  -3   80.53    9.85
  -3   1  -3   72.13    6.46
   3  -1   3   94.71   10.48
   3  -1   3   71.60   10.78
  -3   1  -4  290.09   12.68
   3  -1   4  297.45   22.29
  -3   1  -4  309.97   15.90
  -3   1  -4  284.18   11.56
  -3   1  -4  300.80   44.05
   3  -1   4  292.19   22.55
   3  -1   4  334.62   40.37
   3  -1   5  139.49   18.83
  -3   1  -5  117.25   18.45
  -3   1  -5  133.87    7.51
  -3   1  -5  135.99   17.28
   3  -1   5  118.51   18.25
   3  -1   5  117.76   20.49
   3  -1   6   -4.52    5.80
  -3   1  -6    9.98    5.04
  -3   1  -6   -7.44    9.54
   3  -1   6    9.96    5.34
   3  -1   7   18.27    6.97
  -3   1  -7   10.77    6.48
  -3   1  -7   15.16    7.23
   3  -1   7   15.15    5.85
   3  -1   8   87.74   16.76
  -3   1  -8   99.72   20.42
   3  -1   8   69.45   16.52
  -3   1  -9   79.32   24.44
   3  -1   9  168.90   30.70
  -3   1  -9  144.28   30.15
   3  -1   9  105.15   23.41
   3  -1  10   76.27   18.88
  -3   1 -10   66.24   16.82
   3  -1  10   49.54   17.17
   3  -1  11   -0.35    5.60
  -3   1 -11    8.04    8.73
   3  -1  11    2.63    2.88
   3  -1  12  144.65   14.42
  -3   1 -12  167.52   22.55
   3  -1  13   63.85   20.27
  -3   1 -13   31.48   15.43
  -3   1 -13   41.11   15.80
   3  -1  14   37.44   26.48
  -3   1 -14   24.18   12.73
  -3   1 -14   52.96   37.83
   3  -1  15   72.93   74.54
  -3   1 -15   37.06   18.08
  -3   1 -15   56.98   20.86
   3  -1  16   12.32   11.25
  -3   1 -16   16.63    9.91
  -3   1 -16   14.15   12.43
  -3   1 -17   12.79   10.95
  -3   1 -17   30.66   18.37
  -3   1 -18    3.10    4.36
  -3   1 -18   12.33   11.28
   3   0 -18   23.05   14.74
   3   0 -17   -0.92    7.77
   3   0 -16   22.94   17.18
   3   0 -15  281.91   59.89
   3   0 -14   -0.36   10.59
   3   0 -13  106.05   27.87
   3   0 -13   59.34   22.43
   3   0 -12  513.17   68.04
   3   0 -12  629.52  145.75
  -3   0  11   18.45   12.79
   3   0 -11   40.22   14.67
   3   0 -11   20.22    8.98
   3   0 -10   19.97    9.04
   3   0 -10    8.48    4.04
  -3   0   9  271.44   97.31
   3   0  -9  218.13   32.48
   3   0  -9  240.86   33.41
  -3   0   8  115.06   24.70
   3   0  -8   78.04   13.77
   3   0  -8   84.38   15.91
  -3   0   7   33.87   10.08
   3   0  -7   24.91   11.07
   3   0  -7    6.16    5.29
  -3   0   6  519.98   22.02
   3   0  -6  439.22   49.83
   3   0  -6  560.85   17.40
  -3   0   5  319.32   60.96
   3   0  -5  299.30   30.84
   3   0  -5  287.98   10.92
   3   0  -5  261.82   15.34
  -3   0   4   58.92   14.35
   3   0  -4   59.55   14.09
   3   0  -4   54.74    9.76
  -3   0   3   22.35   12.50
   3   0  -3    6.16    5.80
   3   0  -3   11.30    3.41
  -3   0   2   37.92   12.27
   3   0  -2   45.52    9.36
   3   0  -2   46.41   10.52
  -3   0   2   45.80    8.91
  -3   0   1    9.25    4.80
   3   0  -1   -5.54    7.33
   3   0  -1    8.25    2.47
  -3   0   1    2.57    2.73
  -3   0   0  270.65   18.32
   3   0   0  282.67   13.74
   3   0   0  266.74   12.10
  -3   0   0  278.87   11.94
   3   0   0  289.56   11.44
   3   0   0  317.71   46.98
  -3   0  -1  165.52   18.42
   3   0   1  201.20   23.27
   3   0   1  139.57   10.05
  -3   0  -1  172.45   12.16
   3   0   1  220.43   81.20
   3   0   1  196.21   32.76
  -3   0  -2   36.78    7.95
   3   0   2   26.53    5.75
  -3   0  -2   32.90    6.81
  -3   0  -2   33.99    6.49
  -3   0  -2   25.38    6.96
   3   0   2   21.30    6.26
  -3   0  -2   11.68    8.04
   3   0   2   21.75    6.81
  -3   0  -3  158.59   11.21
   3   0   3  165.77   23.63
  -3   0  -3  182.28   22.33
  -3   0  -3  175.62   23.46
   3   0   3  164.50   20.23
  -3   0  -3  175.82   31.51
   3   0   3  151.69   18.96
   3   0   4   14.45    6.51
  -3   0  -4    2.14    2.73
  -3   0  -4   17.95    9.44
   3   0   4    3.11    2.10
  -3   0  -4  -28.21   14.61
   3   0   4   19.52    8.39
   3   0   5  561.65   22.68
  -3   0  -5  573.38   20.68
  -3   0  -5  631.88   23.00
   3   0   5  603.70   25.66
  -3   0  -5  570.28   39.66
   3   0   5  593.19   19.31
   3   0   6   99.10   14.38
  -3   0  -6   86.68   10.34
  -3   0  -6   99.73   12.90
   3   0   6   75.23   17.41
  -3   0  -6  119.46   18.84
   3   0   6   98.59   13.58
  -3   0  -7    7.18    6.11
   3   0   7   14.68    6.29
  -3   0  -7    5.09    4.20
  -3   0  -7   14.10    8.32
  -3   0  -7   -2.48   13.32
   3   0   7    4.87    4.40
  -3   0  -8  161.76   24.47
   3   0   8  274.60   96.54
  -3   0  -8  282.44   99.92
  -3   0  -8  287.03  104.26
   3   0   8  223.42   33.20
  -3   0  -9    8.87    4.07
   3   0   9    9.51    6.16
  -3   0  -9   -4.33    5.20
  -3   0  -9   16.42   10.53
  -3   0  -9   28.63   13.44
   3   0   9   17.00   11.27
   3   0  10    3.24    3.17
  -3   0 -10   -4.92    8.94
  -3   0 -10   15.76    9.55
   3   0  11   19.32    9.80
  -3   0 -11   17.02   11.48
  -3   0 -11   27.30   15.60
   3   0  12    9.84    7.12
  -3   0 -12   10.02    9.02
  -3   0 -12   31.24   15.32
   3   0  13   55.76   17.41
  -3   0 -13   47.60   17.95
   3   0  14    4.65    4.56
  -3   0 -14   24.11   17.70
   3   0  15  189.87   54.77
  -3   0 -15  201.25   59.81
  -3   0 -16   21.67   14.05
  -3   0 -16   74.90   27.24
  -3   0 -17    4.78    5.55
  -3   0 -17   15.43   14.61
   3   1 -19   -6.54    8.98
   3   1 -18  -18.20   10.67
   3   1 -17   12.08   13.59
   3   1 -16    4.17    6.89
   3   1 -15   20.81   12.40
   3   1 -14   38.05   13.67
   3   1 -13   13.47   11.12
   3   1 -13    4.49    3.78
   3   1 -12  197.18   52.82
   3   1 -12   67.88   22.30
   3   1 -11   -3.86    8.99
   3   1 -11   14.33    8.17
   3   1 -10    5.81    4.30
   3   1 -10    3.91    2.38
  -3  -1   9  451.58   59.19
   3   1  -9  318.83   39.98
   3   1  -9  350.74   23.90
  -3  -1   8   11.59    6.53
   3   1  -8   -2.94    7.26
  -3  -1   7   -1.09   12.99
   3   1  -7    9.18    6.13
   3   1  -7   20.71   13.71
  -3  -1   6  824.19   26.77
   3   1  -6  880.13   86.55
   3   1  -6  860.39   20.51
   3   1  -6  856.66   20.34
   3   1  -6  831.79   23.35
  -3  -1   5  266.99   41.62
   3   1  -5  228.82   31.33
   3   1  -5  254.10   10.02
   3   1  -5  269.79   25.44
  -3  -1   4  180.81   34.73
   3   1  -4  218.87   80.41
   3   1  -4  183.97   13.71
   3   1  -4  234.42   30.37
  -3  -1   3   70.33   13.15
   3   1  -3   67.25   10.56
   3   1  -3   71.32   10.55
   3   1  -3   67.26   13.44
  -3  -1   2  743.30  263.47
   3   1  -2  746.24  264.43
   3   1  -2  748.86  265.13
   3   1  -2  730.11   31.20
  -3  -1   1  559.64   24.23
   3   1  -1  576.47   24.10
   3   1  -1  559.31   22.68
   3   1  -1  582.80   22.90
  -3  -1   1  535.78   24.51
   3   1  -1  563.71   25.23
  -3  -1   0  514.63   21.96
   3   1   0  539.55   21.97
   3   1   0  526.97   21.48
   3   1   0  544.62   21.97
   3   1   0  544.69   25.75
  -3  -1   0  499.83   30.73
   3   1   0  499.62   22.19
  -3  -1  -1    6.97    3.62
   3   1   1    8.32    1.74
   3   1   1    5.08    2.32
  -3  -1  -1    8.63    2.79
   3   1   1    7.71    1.98
  -3  -1  -1    7.01    1.44
  -3  -1  -1    2.02    5.04
   3   1   1    3.56    3.33
  -3  -1  -1   -8.57   14.29
   3   1   1    1.18    5.57
  -3  -1  -2   38.05    7.43
   3   1   2   36.57    8.34
  -3  -1  -2   27.41    5.39
  -3  -1  -2   37.10    6.80
  -3  -1  -2   35.99    8.24
   3   1   2   42.56    8.85
  -3  -1  -2   49.97   12.22
   3   1   2   31.36    6.37
  -3  -1  -3  224.15    9.39
   3   1   3  205.84   10.96
  -3  -1  -3  219.32   23.05
  -3  -1  -3  222.27   10.16
  -3  -1  -3  227.98   28.38
   3   1   3  241.53   27.94
  -3  -1  -3  269.23   47.99
   3   1   3  247.65   23.82
   3   1   4  226.18   10.36
  -3  -1  -4  254.44   11.27
  -3  -1  -4  278.23   17.88
  -3  -1  -4  254.06   34.12
   3   1   4  266.75   26.98
  -3  -1  -4  249.13   36.84
   3   1   4  250.31   26.09
  -3  -1  -5  106.32   22.14
   3   1   5  129.13   15.66
  -3  -1  -5  110.43   14.14
  -3  -1  -5  108.56   12.22
  -3  -1  -5  136.93   19.24
   3   1   5  105.04   12.39
  -3  -1  -5  109.97   18.26
   3   1   5  115.01   13.23
  -3  -1  -6  362.50   17.37
   3   1   6  330.89   31.54
  -3  -1  -6  287.30   34.27
  -3  -1  -6  326.91   44.67
  -3  -1  -6  287.93   46.95
   3   1   6  297.52   36.48
  -3  -1  -7   68.57   17.90
   3   1   7  130.01   23.75
  -3  -1  -7   90.12   16.99
  -3  -1  -7  119.53   24.33
  -3  -1  -7  102.58   30.23
   3   1   7   91.46   17.74
  -3  -1  -8  175.41   33.33
   3   1   8  245.18   45.83
  -3  -1  -8  183.67   34.63
  -3  -1  -8  224.35   43.57
  -3  -1  -8  263.52   48.97
  -3  -1  -9   10.37    6.66
   3   1   9   -1.51    5.32
  -3  -1  -9   37.09   12.98
  -3  -1  -9   30.10   16.06
   3   1  10   32.82   14.50
  -3  -1 -10   12.54    9.25
  -3  -1 -10   29.77   13.20
   3   1  11   48.27   17.52
  -3  -1 -11   42.92   16.04
  -3  -1 -11   59.47   23.80
   3   1  12  -10.08    5.88
  -3  -1 -12   22.25   12.58
  -3  -1 -12    2.47    8.23
   3   1  13   59.98   19.81
  -3  -1 -13   49.45   21.86
  -3  -1 -13   39.69   16.29
   3   1  14   14.13   10.15
  -3  -1 -14    5.40   14.95
  -3  -1 -14   32.04   16.77
   3   1  15   -5.04    4.78
  -3  -1 -15   21.01   11.15
  -3  -1 -16   38.52   15.35
  -3  -1 -17   -4.84    4.68
  -3  -1 -17   51.28   25.49
   3   2 -19   -6.30    7.71
   3   2 -19   31.62   16.36
   3   2 -18   29.37   14.02
   3   2 -18   27.94   14.95
   3   2 -17   19.27   13.18
   3   2 -16   15.25   11.82
   3   2 -15   15.72   13.21
   3   2 -14   31.13   14.52
   3   2 -13    7.51    6.52
   3   2 -12   -7.42    7.61
   3   2 -11   51.01   17.99
   3   2 -10  161.51  119.84
   3   2 -10  159.24   29.71
   3   2 -10  151.60   27.39
   3   2  -9   20.64    6.85
   3   2  -9   35.50   15.30
   3   2  -9   29.91   11.02
   3   2  -9   27.38    9.29
   3   2  -8  228.40   19.60
   3   2  -8  232.45   29.35
   3   2  -8  235.32   22.49
  -3  -2   7  324.06   58.87
   3   2  -7  295.01   43.88
   3   2  -7  273.83   10.28
   3   2  -7  293.02   23.59
   3   2  -7  298.97   15.01
  -3  -2   6  237.04   39.42
   3   2  -6  205.21   27.84
   3   2  -6  197.68   10.69
   3   2  -6  228.57   24.56
   3   2  -6  262.50   30.04
  -3  -2   5 1172.02   34.41
   3   2  -5 1170.98   32.95
   3   2  -5 1121.01   28.68
   3   2  -5 1130.59   29.21
  -3  -2   4 1814.49   42.36
   3   2  -4 1867.77   34.38
   3   2  -4 1832.15   28.16
   3   2  -4 1864.47   30.96
  -3  -2   3  125.91   25.39
   3   2  -3  110.68   18.00
   3   2  -3   95.50    7.44
   3   2  -3   92.08   15.24
  -3  -2   2  527.17   23.67
   3   2  -2  561.57   24.58
   3   2  -2  546.26   23.29
  -3  -2   2  525.65   30.53
   3   2  -2  498.15   22.67
  -3  -2   1  189.72   13.48
   3   2  -1  228.76   83.34
   3   2  -1  199.77   13.62
  -3  -2   1  197.83   13.26
  -3  -2   1  239.87   34.59
   3   2  -1  231.55   31.23
  -3  -2   0   26.26    6.31
   3   2   0   21.40    4.84
   3   2   0   13.79    3.95
   3   2   0   24.90    6.15
  -3  -2   0   24.10    4.48
   3   2   0   28.09    5.51
  -3  -2   0   -7.93   13.32
   3   2   0   34.43    9.93
   3   2   1 1872.76   34.16
   3   2   1 1868.71   27.39
  -3  -2  -1 1806.07   30.03
  -3  -2  -2  643.33   15.48
   3   2   2  656.47   18.00
   3   2   2  660.06   18.24
  -3  -2  -2  662.78   16.62
  -3  -2  -2  638.54   18.20
   3   2   2  659.68   17.60
  -3  -2  -2  706.49   43.81
   3   2   2  666.65   19.57
  -3  -2  -3    6.03    3.00
  -3  -2  -3    2.02    1.32
   3   2   3    8.97    4.35
  -3  -2  -3   13.48    5.43
  -3  -2  -3   19.45    8.14
   3   2   3    5.64    2.96
  -3  -2  -3   -4.56   15.59
   3   2   3    5.91    5.09
  -3  -2  -4   10.70    6.12
   3   2   4    4.59    3.24
  -3  -2  -4    1.28    2.63
  -3  -2  -4   -3.50    6.38
   3   2   4    4.50    2.72
  -3  -2  -4   -1.20   13.62
   3   2   4    5.38    3.77
  -3  -2  -5  304.83   33.95
   3   2   5  281.84   33.28
  -3  -2  -5  300.75   26.18
  -3  -2  -5  312.88   39.09
   3   2   5  304.26   35.83
  -3  -2  -5  307.14   48.77
   3   2   5  255.08   32.78
  -3  -2  -6   74.77   18.59
   3   2   6   93.57   18.30
  -3  -2  -6   68.65   15.15
  -3  -2  -6   79.09   14.90
   3   2   6   61.31   12.99
  -3  -2  -6   68.59   16.45
   3   2   6   60.45   14.52
  -3  -2  -7   90.49   19.43
   3   2   7   95.25   18.27
  -3  -2  -7   77.31   27.53
  -3  -2  -7   83.94   16.71
  -3  -2  -7   81.92   17.66
  -3  -2  -8  491.96   48.24
   3   2   8  543.49   30.82
  -3  -2  -8  523.55   26.91
  -3  -2  -8  582.18   33.69
  -3  -2  -8  512.46   52.06
  -3  -2  -9   16.50    9.27
   3   2   9   33.79   14.37
  -3  -2  -9   48.03   18.23
  -3  -2  -9   27.03   15.16
  -3  -2 -10    9.22    7.36
   3   2  10    7.96    5.97
  -3  -2 -10   22.16   12.62
  -3  -2 -10   19.32   12.69
   3   2  11  166.42   19.17
  -3  -2 -11  164.88   15.95
  -3  -2 -11  131.59  127.02
   3   2  12   11.17    8.95
  -3  -2 -12    3.24    7.88
  -3  -2 -12   24.52   12.46
   3   2  13   27.17   30.65
  -3  -2 -13   14.43   12.14
  -3  -2 -13   -5.02   11.76
   3   2  14    8.28    6.99
  -3  -2 -14   13.46   10.20
  -3  -2 -15   40.53   18.49
  -3  -2 -16  -10.12   10.62
  -3  -2 -17    8.66    9.02
   3   3 -19   15.95   13.44
   3   3 -19   30.03   19.11
   3   3 -18   21.73   15.50
   3   3 -18   -5.85   10.56
   3   3 -17   37.64   19.61
   3   3 -17   41.00   20.91
   3   3 -16   22.79   16.10
   3   3 -16   -5.11    8.44
   3   3 -15   -3.02    8.82
   3   3 -15   27.40   14.16
   3   3 -14   49.12   17.63
   3   3 -13   16.26   10.13
   3   3 -12   53.18   17.73
   3   3 -12   86.89   25.25
   3   3 -11    0.76    1.44
   3   3 -11   23.00   12.57
   3   3 -10   51.76   12.48
   3   3 -10   53.27   13.31
   3   3  -9  175.79   20.75
   3   3  -9  215.23   32.75
   3   3  -9  197.49   21.41
   3   3  -8  349.46  191.22
   3   3  -8  334.05   42.91
   3   3  -8  367.61   15.20
   3   3  -7  297.25   52.87
   3   3  -7  348.60   18.63
   3   3  -7  351.08   15.07
   3   3  -7  335.65   12.29
   3   3  -7  369.55   12.48
   3   3  -6  109.59   24.62
   3   3  -6  140.55   15.22
   3   3  -6  144.01   15.97
   3   3  -6  156.34   17.62
   3   3  -6  136.23   16.84
   3   3  -5   36.03    9.13
   3   3  -5   38.16    7.60
   3   3  -5   48.46    9.04
   3   3  -5   45.31    9.11
   3   3  -4  373.51   14.41
   3   3  -4  397.65   14.41
   3   3  -4  420.36   14.59
  -3  -3   4  415.46   28.02
   3   3  -4  394.02   12.87
   3   3  -3  209.15   38.49
   3   3  -3  213.46   20.19
  -3  -3   3  241.15   43.79
   3   3  -3  199.07   25.13
   3   3  -2  436.32   19.11
   3   3  -2  447.07   20.18
  -3  -3   2  447.12   18.29
  -3  -3   2  432.53   21.44
   3   3  -2  437.40   19.61
   3   3  -1  534.92   26.05
   3   3  -1  547.12   24.92
  -3  -3   1  522.36   21.10
   3   3  -1  484.64   24.13
  -3  -3   1  549.68   25.97
   3   3  -1  545.68   23.96
   3   3   0  259.09   12.14
   3   3   0  280.58   11.91
  -3  -3   0  266.77   11.00
   3   3   0  285.47   12.16
  -3  -3   0  313.64   33.20
   3   3   0  284.54   28.38
   3   3   1   54.00   11.52
   3   3   1   66.84   11.27
  -3  -3  -1   72.90   11.42
  -3  -3  -1   64.90   12.37
   3   3   1   77.21   11.93
  -3  -3  -1   85.70   16.94
   3   3   1   75.52   13.55
   3   3   2  380.17   11.31
  -3  -3  -2  392.20   16.00
  -3  -3  -2  391.26   27.08
   3   3   2  378.50   10.66
  -3  -3  -2  365.79   17.46
   3   3   2  336.44  153.25
   3   3   3  207.59   30.14
   3   3   3  222.45   16.56
  -3  -3  -3  225.95   16.32
  -3  -3  -3  261.75  159.74
   3   3   3  224.57   24.41
  -3  -3  -3  212.03   29.99
   3   3   3  223.41   28.17
  -3  -3  -4    7.18    3.92
   3   3   4   21.69    7.13
  -3  -3  -4   12.50    6.40
  -3  -3  -4   13.52    7.97
   3   3   4    0.46    1.68
  -3  -3  -4    7.61    8.03
   3   3   4   27.56   10.00
  -3  -3  -5   53.05   11.57
   3   3   5   70.53   17.49
  -3  -3  -5   61.79   12.94
  -3  -3  -5   61.15   13.40
   3   3   5   43.63   11.69
  -3  -3  -5   65.02   15.93
  -3  -3  -6   10.23    6.91
   3   3   6   15.81    6.26
  -3  -3  -6    6.54    5.44
  -3  -3  -6   17.09    6.39
   3   3   6   -1.36    3.63
  -3  -3  -6    7.46    5.64
  -3  -3  -7   34.93   13.62
   3   3   7   45.23   17.55
  -3  -3  -7   28.14   11.71
  -3  -3  -7   44.26   16.07
  -3  -3  -7   22.36   11.52
  -3  -3  -8  157.39   39.71
   3   3   8  203.63   46.02
  -3  -3  -8  197.43   48.67
  -3  -3  -8  144.90   42.66
  -3  -3  -9   89.71   21.73
   3   3   9  136.20   31.10
  -3  -3  -9  137.37   31.58
  -3  -3  -9  115.77   31.33
   3   3  10   -5.02    5.38
  -3  -3 -10    9.04    8.76
  -3  -3 -10  -26.75   12.67
   3   3  11  110.60   32.05
  -3  -3 -11   90.48   24.34
  -3  -3 -11   84.23   31.83
   3   3  12   98.70   16.88
  -3  -3 -12   79.59   27.91
  -3  -3 -12   65.00   26.78
   3   3  13   28.65   14.66
  -3  -3 -13   58.49   22.54
  -3  -3 -13   50.02   25.96
   3   3  14   67.66   20.27
  -3  -3 -14   42.21   22.43
  -3  -3 -14   23.03   14.62
  -3  -3 -15   13.22   12.19
  -3  -3 -16   29.38   15.35
   3   4 -19   14.13    6.32
   3   4 -19   27.57   18.21
   3   4 -18   20.16   13.09
   3   4 -18   -9.35   10.19
   3   4 -17   -3.74    8.88
   3   4 -17    5.97    8.69
   3   4 -16  116.72   24.26
   3   4 -16   72.67   29.79
   3   4 -15    9.82    8.62
   3   4 -15   27.51   14.07
   3   4 -14   11.50    9.43
   3   4 -14   14.68   11.44
   3   4 -13  266.90   24.30
   3   4 -13  287.64   39.59
   3   4 -12  133.60   31.64
   3   4 -12  200.96   46.01
   3   4 -12  185.51   44.46
   3   4 -11   39.05   13.47
   3   4 -11   45.89   16.81
   3   4 -11   39.20   14.92
   3   4 -10  121.65   23.97
   3   4 -10  162.26   29.18
   3   4 -10  170.45   27.66
   3   4  -9  711.78   46.33
   3   4  -9  691.68   53.51
   3   4  -9  672.29   46.56
   3   4  -9  631.06   40.51
   3   4  -8   10.25    6.37
   3   4  -8   -0.87    6.46
   3   4  -8   11.03    7.32
   3   4  -8   11.20    4.48
   3   4  -7   22.82    5.38
   3   4  -7   30.90    8.35
   3   4  -7   16.23    7.90
   3   4  -7   22.18    5.30
   3   4  -6   33.19    9.01
   3   4  -6   33.82    7.81
   3   4  -6   23.49    6.21
   3   4  -6   34.30    9.10
   3   4  -6   38.53    9.42
   3   4  -5  153.46   21.51
   3   4  -5  206.48   28.50
   3   4  -5  156.63   14.96
  -3  -4   5  173.33   23.11
   3   4  -5  143.36   15.59
   3   4  -4   78.36   13.48
   3   4  -4   98.19   18.13
   3   4  -4   78.39   12.51
  -3  -4   4   68.47   12.03
   3   4  -4   70.51   14.61
   3   4  -3  106.55   19.73
   3   4  -3  114.29   18.69
  -3  -4   3  101.53   15.47
   3   4  -3  115.90   18.68
  -3  -4   3  122.60   57.28
   3   4  -3  106.28   17.04
   3   4  -2    3.28    5.89
   3   4  -2    7.61    5.22
  -3  -4   2   -1.07    3.94
  -3  -4   2   20.65    9.16
   3   4  -2    7.96    4.89
   3   4  -1    6.92    5.32
   3   4  -1    2.62    2.70
  -3  -4   1    4.90    2.66
   3   4  -1   16.00    6.19
  -3  -4   1   22.82    9.41
   3   4  -1   22.87    9.36
   3   4   0  142.41    9.56
   3   4   0  150.43    7.46
   3   4   0  157.53    7.65
  -3  -4   0  164.85    9.48
   3   4   0  167.68    7.44
  -3  -4   0  199.63   21.08
   3   4   0  161.94   18.17
   3   4   1  339.29  151.93
  -3  -4  -1  339.06  151.88
  -3  -4  -1  340.57  152.56
   3   4   1  335.02   13.57
  -3  -4  -1  373.86   52.95
   3   4   1  287.83   33.29
   3   4   2   70.84   15.04
  -3  -4  -2   74.81   15.04
  -3  -4  -2   69.13   15.03
   3   4   2   69.62   14.76
  -3  -4  -2   52.66   14.11
   3   4   2   48.36   11.21
   3   4   3   93.60   14.51
   3   4   3  100.22   14.63
  -3  -4  -3   90.90   11.12
  -3  -4  -3  100.76   12.00
   3   4   3   97.25   10.13
  -3  -4  -3   91.54   14.77
   3   4   3   59.98   15.22
   3   4   4   24.17    9.86
  -3  -4  -4    9.27    6.67
  -3  -4  -4   24.03   10.20
   3   4   4   15.34    5.66
  -3  -4  -4    4.12    8.89
  -3  -4  -5  103.89   20.81
   3   4   5  150.91   24.91
  -3  -4  -5  123.14   20.50
  -3  -4  -5  154.99   21.92
   3   4   5  128.48   21.98
  -3  -4  -5  121.53   24.25
  -3  -4  -6  238.50   39.28
   3   4   6  281.92   52.77
  -3  -4  -6  201.26   33.82
  -3  -4  -6  275.58   49.52
   3   4   6  191.32   30.50
  -3  -4  -6  223.44   47.94
  -3  -4  -7    8.84    6.86
   3   4   7   17.13   10.52
  -3  -4  -7   11.16    7.47
  -3  -4  -7   21.71   11.43
  -3  -4  -8    7.76    5.78
   3   4   8   17.22   10.48
  -3  -4  -8    5.56    6.42
  -3  -4  -8   15.47   10.29
   3   4   9   94.21   26.06
  -3  -4  -9   82.91   21.83
  -3  -4  -9  104.20   27.82
   3   4  10   72.80   25.69
  -3  -4 -10  102.16   26.55
  -3  -4 -10   92.40   24.51
   3   4  11   12.90   10.59
  -3  -4 -11   -7.96    9.16
  -3  -4 -11   -1.84   10.52
   3   4  12   19.24   12.96
  -3  -4 -12    8.45    9.55
  -3  -4 -12   37.69   16.28
   3   4  13    4.94    5.94
  -3  -4 -13   49.13   22.20
  -3  -4 -13   41.83   25.02
  -3  -4 -14   15.70   14.59
  -3  -4 -14   24.03   15.52
  -3  -4 -15   12.66    7.33
  -3  -4 -16   -4.46    8.30
   3   5 -19    9.56    9.77
   3   5 -19   -0.63    8.91
   3   5 -18   23.11   16.99
   3   5 -18   14.00   13.22
   3   5 -17   40.48   21.23
   3   5 -17   29.84   16.87
   3   5 -16   31.71   15.01
   3   5 -16    3.96    5.85
   3   5 -15    4.46    6.94
   3   5 -15    3.51    5.01
   3   5 -14   -8.27    7.97
   3   5 -14   -2.23    7.81
   3   5 -13   -0.90    7.06
   3   5 -13    4.84    4.20
   3   5 -12   10.11    6.60
   3   5 -12   16.49    9.06
   3   5 -12   19.92   10.05
   3   5 -11   28.32   12.48
   3   5 -11   36.72   14.47
   3   5 -11   31.80   26.62
   3   5 -10    8.27    3.86
   3   5 -10   14.50    8.80
   3   5 -10   20.23    7.55
   3   5  -9  286.38   96.08
   3   5  -9  340.40   39.26
   3   5  -9  283.12   97.46
   3   5  -9  324.10   21.06
   3   5  -8  200.38   24.51
   3   5  -8  173.01   29.59
   3   5  -8  200.41   29.86
   3   5  -8  226.90   27.44
   3   5  -7   31.30    6.95
   3   5  -7   23.68    9.34
   3   5  -7   47.95   12.29
   3   5  -7   35.86    8.57
  -3  -5   7   34.34    8.62
   3   5  -7   44.74    9.50
   3   5  -6   31.74    7.09
   3   5  -6   40.72    9.33
   3   5  -6   52.23   11.44
   3   5  -6   48.18   10.69
  -3  -5   6   61.52   15.81
   3   5  -6   52.76   10.51
   3   5  -5    5.07    5.30
   3   5  -5   16.45    8.23
  -3  -5   5   11.12    6.42
   3   5  -5    8.34    4.40
  -3  -5   5   -5.94    8.48
   3   5  -5   10.01    4.95
   3   5  -4 1006.87   31.67
   3   5  -4  994.70   29.73
  -3  -5   4 1051.58   30.98
   3   5  -4 1067.76   30.43
  -3  -5   4 1007.68   32.15
   3   5  -4 1046.16   31.35
   3   5  -3  121.88   58.39
   3   5  -3  172.53   23.88
  -3  -5   3  151.43   16.55
   3   5  -3  166.53    7.67
  -3  -5   3  166.54   31.28
   3   5  -3  133.57   15.83
   3   5  -2   76.94   15.48
   3   5  -2  100.03   16.44
  -3  -5   2   82.48   15.06
   3   5  -2   93.72   12.51
   3   5  -2   96.42   14.01
  -3  -5   2  102.78   17.70
   3   5  -2   69.36   16.80
   3   5  -1  600.80   18.37
   3   5  -1  600.99   18.70
  -3  -5   1  600.56   18.21
   3   5  -1  632.51   17.94
   3   5  -1  612.74   20.55
   3   5   0  138.79   10.05
   3   5   0  137.32   10.26
   3   5   0  141.48   19.04
  -3  -5   0  151.98   16.22
   3   5   0  145.69   10.48
  -3  -5   0  134.26   16.57
   3   5   0  116.78   16.66
   3   5   1   53.93   11.52
  -3  -5  -1   59.69   11.79
   3   5   1   56.10   12.46
  -3  -5  -1   53.37   16.75
   3   5   1   25.00    5.94
   3   5   2   20.22    7.83
  -3  -5  -2   10.58    7.39
  -3  -5  -2   17.13    6.60
   3   5   2   14.03    5.12
  -3  -5  -2   30.13   10.98
   3   5   3    4.19    4.24
   3   5   3   -1.93    5.66
  -3  -5  -3    8.52    5.69
  -3  -5  -3    9.71    6.33
   3   5   3   -1.82    2.96
  -3  -5  -3   15.41    9.05
   3   5   4  439.23   45.83
   3   5   4  391.39   29.08
  -3  -5  -4  377.96   35.66
  -3  -5  -4  408.41   29.96
   3   5   4  366.20   30.80
  -3  -5  -4  369.44   52.45
  -3  -5  -5  387.92   18.91
   3   5   5  367.72   33.06
  -3  -5  -5  306.64   29.22
  -3  -5  -5  365.63   39.39
   3   5   5  344.73   17.77
  -3  -5  -5  308.90   42.90
  -3  -5  -6  213.29   45.08
   3   5   6  210.78   48.09
  -3  -5  -6  191.48   45.77
   3   5   6  181.67   38.58
  -3  -5  -6  194.46   49.81
  -3  -5  -7  130.21   29.19
   3   5   7  108.26   29.87
  -3  -5  -7  152.51   34.82
  -3  -5  -7  179.98   52.14
  -3  -5  -8    8.62    6.23
   3   5   8   -1.69    5.71
  -3  -5  -8   14.38    9.69
  -3  -5  -8  -11.29   14.52
   3   5   9   10.23    7.34
  -3  -5  -9   20.21   11.82
  -3  -5  -9   17.63   11.90
   3   5  10    7.09    8.04
  -3  -5 -10    0.79    4.01
  -3  -5 -10   -9.86   13.42
   3   5  11   -2.71    5.38
  -3  -5 -11   17.61   14.30
  -3  -5 -11  -18.79   11.54
   3   5  12   37.52   38.79
  -3  -5 -12   16.99   11.65
  -3  -5 -12   42.70   21.87
   3   5  13   30.18   13.54
  -3  -5 -13   42.15   21.44
  -3  -5 -13   11.09   13.18
  -3  -5 -14   22.19   14.08
  -3  -5 -14   -0.45   10.69
  -3  -5 -15    3.71    5.33
  -3  -5 -16   16.96   11.32
   3   6 -19   23.88   13.52
   3   6 -19   30.42   17.79
   3   6 -18   32.46   15.76
   3   6 -18   52.21   22.85
   3   6 -17   14.71   10.20
   3   6 -17   17.33   13.32
   3   6 -16   -3.71    8.61
   3   6 -16    7.08    7.55
   3   6 -15  155.45   28.88
   3   6 -14   12.66    9.36
   3   6 -14   31.27   15.02
   3   6 -13   19.04   12.64
   3   6 -13   27.59   12.39
   3   6 -12   59.28   21.61
   3   6 -12  117.43   27.83
   3   6 -12  109.52   24.86
   3   6 -11    5.04    4.90
   3   6 -11   -4.86    8.00
   3   6 -11   -2.13    6.04
   3   6 -10   -1.16    3.38
   3   6 -10    7.21    7.53
   3   6 -10    5.88    5.80
   3   6  -9   10.05    6.40
   3   6  -9   17.76   13.56
   3   6  -9   13.18    8.34
   3   6  -9    1.30    1.29
   3   6  -8   89.42   19.69
   3   6  -8  130.80   24.32
   3   6  -8  122.81   22.97
  -3  -6   8  133.63   27.72
   3   6  -8  144.81   17.71
   3   6  -7   38.96    9.90
  -3  -6   7   29.12    9.90
   3   6  -7   20.82    6.82
   3   6  -6    8.62    6.57
   3   6  -6   12.77    5.30
   3   6  -6   16.93    7.12
   3   6  -6    9.13    6.16
  -3  -6   6   33.66    8.67
   3   6  -6   12.42    4.65
   3   6  -5   56.39   13.40
   3   6  -5   65.72   14.98
  -3  -6   5   42.91   10.30
   3   6  -5   68.97   15.66
  -3  -6   5   68.29   18.56
   3   6  -5   58.30   12.31
   3   6  -4   36.14    9.00
   3   6  -4   60.64   13.07
  -3  -6   4   38.65    8.13
   3   6  -4   45.18   10.31
  -3  -6   4   47.79   13.07
   3   6  -4   47.71   11.11
   3   6  -3   10.18    5.65
   3   6  -3    4.83    4.00
  -3  -6   3    7.24    5.19
   3   6  -3    3.40    2.14
  -3  -6   3   -4.12    9.29
   3   6  -3   -1.46    4.79
   3   6  -2   83.46   11.51
  -3  -6   2   88.13   14.22
  -3  -6   2   84.87   13.34
   3   6  -2   74.55   16.09
   3   6  -1  121.11   18.16
   3   6  -1  108.50   20.34
  -3  -6   1  101.40   17.35
  -3  -6   1  137.30   27.52
   3   6  -1   76.83   16.07
   3   6   0  755.92   29.94
   3   6   0  756.69   32.08
  -3  -6   0  798.67   32.60
   3   6   0  681.76   26.68
  -3  -6   0  760.68   41.63
   3   6   1  474.78   21.27
  -3  -6  -1  471.44   23.03
   3   6   1  428.06   17.62
  -3  -6  -1  460.72   58.23
   3   6   2  173.11   24.94
  -3  -6  -2  140.12   18.74
  -3  -6  -2  157.53   22.58
   3   6   2  152.53   18.62
  -3  -6  -2  165.06   39.43
   3   6   3  322.13   39.31
  -3  -6  -3  322.12   28.69
  -3  -6  -3  352.60   28.90
   3   6   3  318.12   22.03
  -3  -6  -3  374.64   45.86
   3   6   4   -4.11    5.69
   3   6   4    9.85    6.80
  -3  -6  -4    4.51    2.63
  -3  -6  -4   -2.04    4.81
   3   6   4    6.99    3.31
  -3  -6  -4    9.69    8.07
   3   6   5   -3.50    6.36
  -3  -6  -5   -4.49    5.54
  -3  -6  -5   31.94   14.17
  -3  -6  -6    7.79    5.19
   3   6   6    6.86    5.00
  -3  -6  -6    8.16    5.82
   3   6   6    3.06    3.09
  -3  -6  -6   -0.31   14.33
  -3  -6  -7  154.70   35.99
   3   6   7  163.52   20.57
  -3  -6  -7  162.74   16.24
  -3  -6  -7  168.77   24.75
   3   6   8   81.53   21.15
  -3  -6  -8   64.65   21.48
  -3  -6  -8   77.98   85.44
   3   6   9   14.50    9.89
  -3  -6  -9   17.32   12.51
  -3  -6  -9   50.22   16.32
   3   6  10  102.16   23.49
  -3  -6 -10   93.15   16.59
  -3  -6 -10   60.65   21.86
   3   6  11   38.34   21.75
  -3  -6 -11   30.30   20.37
  -3  -6 -11   56.40   21.46
   3   6  12   18.99   11.47
  -3  -6 -12   38.74   19.28
  -3  -6 -12   30.36   16.25
  -3  -6 -13   48.65   27.07
  -3  -6 -13   41.28   18.40
  -3  -6 -14   18.73    9.70
  -3  -6 -14   42.98   18.95
  -3  -6 -15    8.69   10.64
   3   7 -20   -2.60    8.23
   3   7 -19  -14.81    9.08
   3   7 -19   15.08   13.26
   3   7 -18    6.72    8.09
   3   7 -18   -1.63    9.17
   3   7 -17   23.43   16.77
   3   7 -17   76.48   34.45
   3   7 -16   20.70   14.01
   3   7 -16   24.05   17.09
   3   7 -15  156.99   28.05
   3   7 -14   72.12   19.02
   3   7 -14   27.33   14.01
   3   7 -13   60.64   23.58
   3   7 -13   38.69   14.91
   3   7 -12   48.63   17.94
   3   7 -12   11.76    7.86
   3   7 -11   20.77   10.49
   3   7 -11    7.66    5.67
   3   7 -10  147.24   35.34
   3   7 -10  128.84   30.21
   3   7  -9   35.99   14.10
   3   7  -9   37.26   14.28
  -3  -7   9   32.29   12.52
   3   7  -9   27.58   11.14
   3   7  -8   42.43   16.31
   3   7  -8   21.21    8.08
  -3  -7   8   28.38   11.00
   3   7  -8   25.31   10.41
   3   7  -7   10.61    8.08
   3   7  -7    6.88    4.61
  -3  -7   7   -2.73    8.52
   3   7  -7    6.92    4.43
   3   7  -6    6.57    5.07
   3   7  -6   10.35    7.24
   3   7  -6    3.95    2.60
  -3  -7   6   20.02    8.15
   3   7  -6   10.85    6.79
   3   7  -5   28.54   12.98
   3   7  -5   39.96   11.52
   3   7  -5   29.23   10.04
  -3  -7   5   35.95   13.21
   3   7  -5   19.29    6.62
   3   7  -4    5.67    3.82
  -3  -7   4    8.16    5.47
   3   7  -4    1.76    1.46
  -3  -7   4   26.57    9.99
   3   7  -4   -2.24    4.94
   3   7  -3   26.70   10.08
  -3  -7   3   21.14    7.97
  -3  -7   3   38.31   10.09
   3   7  -3   13.29    5.51
   3   7  -2   -0.97    3.49
   3   7  -2    2.77    4.40
  -3  -7   2    7.18    6.40
  -3  -7   2   10.66    9.59
   3   7  -1   23.41    7.72
   3   7  -1   19.74    7.37
  -3  -7   1   26.58    8.78
  -3  -7   1   28.18   11.84
   3   7   0    6.92    4.07
   3   7   0   -6.14    5.68
  -3  -7   0    5.07    4.02
  -3  -7   0   27.33   10.57
   3   7   1  272.60   89.94
   3   7   1  314.39   33.49
  -3  -7  -1  238.10   31.48
  -3  -7  -1  289.34  101.80
   3   7   2  225.97   38.18
  -3  -7  -2  211.60   31.61
  -3  -7  -2  225.00   44.36
   3   7   3   53.23   18.04
  -3  -7  -3   56.56   19.20
   3   7   3   31.17   25.83
  -3  -7  -3   18.37   10.65
   3   7   4   48.74   17.35
  -3  -7  -4   55.04   19.33
   3   7   4   31.10   26.16
  -3  -7  -4   61.60   23.29
   3   7   5  322.59   31.16
   3   7   5  303.88   43.23
  -3  -7  -5  254.87   27.60
   3   7   5  192.85   43.29
  -3  -7  -5  236.66   37.77
   3   7   6   -1.04    5.82
  -3  -7  -6   -9.59    6.45
  -3  -7  -6   -1.46   15.05
   3   7   7   -2.90    5.88
  -3  -7  -7   18.12   12.18
  -3  -7  -7  -11.95   14.48
   3   7   8   77.46   20.15
  -3  -7  -8   89.17   21.88
  -3  -7  -8   73.57   26.76
   3   7   9   41.93   16.36
  -3  -7  -9   47.63   23.07
  -3  -7  -9   36.98   21.38
   3   7  10   24.44   17.55
  -3  -7 -10    9.21    8.06
  -3  -7 -10   32.03   17.48
   3   7  11   11.44   10.10
  -3  -7 -11   16.28   13.29
  -3  -7 -11    9.91   11.50
   3   7  12   10.99    9.58
  -3  -7 -12    2.51    4.37
  -3  -7 -12   12.67   12.08
  -3  -7 -13   13.79    4.45
  -3  -7 -13   21.60   21.96
   3   8 -20   25.37   13.42
   3   8 -19   12.38    5.79
   3   8 -19   18.22   14.09
   3   8 -18    0.27    7.56
   3   8 -18   32.26   15.50
   3   8 -17   53.06   22.40
   3   8 -17   67.74   19.97
   3   8 -16    9.31    8.65
   3   8 -16    9.77    9.59
   3   8 -15   -2.82    9.40
   3   8 -15   19.33   14.59
   3   8 -14   13.91   10.72
   3   8 -14   -4.83    7.42
   3   8 -13   63.47   22.93
   3   8 -13   52.42   19.03
   3   8 -12   12.72    9.84
   3   8 -12   10.70    8.29
   3   8 -11   15.53   10.06
   3   8 -11   24.82   12.33
   3   8 -10  292.01   35.65
   3   8 -10  251.34   27.37
  -3  -8  10  218.48   23.65
   3   8  -9  117.80   28.73
   3   8  -9  164.93   37.34
  -3  -8   9   96.14   23.79
   3   8  -8    9.27    8.90
   3   8  -8    3.82    3.90
  -3  -8   8   10.93    7.03
   3   8  -8    0.80    2.19
   3   8  -7  787.62   44.13
   3   8  -7  849.15   41.47
  -3  -8   7  742.36   44.05
   3   8  -7  735.99   36.06
   3   8  -6  329.84   29.04
   3   8  -6  372.69   18.92
  -3  -8   6  355.66   35.17
   3   8  -6  281.81   46.05
   3   8  -5   12.90    6.02
   3   8  -5   25.19    8.67
  -3  -8   5   30.40   11.05
   3   8  -5   23.61    8.38
   3   8  -4   11.34    6.66
  -3  -8   4   14.69    6.41
   3   8  -3   67.47   16.30
   3   8  -3   62.40   15.87
  -3  -8   3   81.14   17.97
   3   8  -2    4.92    3.42
   3   8  -2   19.93    7.20
  -3  -8   2   13.68    6.42
   3   8  -1   11.67    6.58
   3   8  -1   -2.47    5.50
  -3  -8   1   14.13   10.42
   3   8   0  105.27   24.96
   3   8   0   99.86   20.35
  -3  -8   0  106.97   26.39
   3   8   1   20.95    8.87
   3   8   1   18.73   14.18
  -3  -8  -1   25.83   11.15
   3   8   2  478.02   19.02
   3   8   2  534.52   48.05
  -3  -8  -2  494.28   34.19
   3   8   3  125.88   31.90
  -3  -8  -3   87.09   26.79
  -3  -8  -3   80.19   24.94
   3   8   4   26.71   13.86
  -3  -8  -4   12.15    7.47
  -3  -8  -4   -5.85   12.79
   3   8   5  116.34   29.02
   3   8   5  164.91   15.94
  -3  -8  -5  102.73   32.11
  -3  -8  -5  113.20   28.51
   3   8   6   34.50   16.66
  -3  -8  -6   36.59   14.07
  -3  -8  -6   18.22   13.32
   3   8   7    8.06    9.26
  -3  -8  -7   14.13   11.90
  -3  -8  -7   22.08   15.42
   3   8   8   72.93   24.18
  -3  -8  -8   25.96   15.31
  -3  -8  -8   74.72   27.95
   3   8   9   -1.51    6.38
  -3  -8  -9   -9.42    6.16
  -3  -8  -9   19.42   14.81
   3   8  10    7.40    8.28
  -3  -8 -10   17.57    8.25
  -3  -8 -10   22.43   16.99
   3   8  11   11.01   10.07
  -3  -8 -11   22.63   19.56
  -3  -8 -12  -13.35   12.50
  -3  -8 -13   16.13   11.56
   3   9 -20    6.61    8.26
   3   9 -19   21.61   12.85
   3   9 -19    9.75    9.51
   3   9 -18    8.39   10.36
   3   9 -18    3.10    6.46
   3   9 -17   39.03   18.55
   3   9 -17   36.79   18.40
   3   9 -16   30.35   18.71
   3   9 -16   54.36   19.98
   3   9 -15   32.93   15.83
   3   9 -15   16.38   10.79
   3   9 -14   -6.89    9.48
   3   9 -14   -5.06    7.06
   3   9 -13   -4.50    9.36
   3   9 -13   11.47    9.32
   3   9 -12  147.95   14.61
   3   9 -12  113.69   31.59
   3   9 -11   67.29   25.84
   3   9 -11   30.45   14.00
   3   9 -10  176.19   18.87
   3   9 -10  178.23   18.14
  -3  -9  10  119.43   27.25
   3   9  -9   12.16    9.68
   3   9  -9   20.20   10.20
  -3  -9   9   12.75    8.95
   3   9  -8   67.78   23.94
   3   9  -8   90.09   25.25
  -3  -9   8  111.29   33.17
   3   9  -8   41.31   18.92
   3   9  -7  158.05   40.37
   3   9  -7  142.14   31.84
  -3  -9   7  120.23   31.95
   3   9  -7   65.91   17.25
   3   9  -6  160.79   40.58
   3   9  -6  156.67   34.19
  -3  -9   6  186.30   43.52
   3   9  -5   24.42   11.16
  -3  -9   5   40.04   15.60
   3   9  -4  399.71   31.59
   3   9  -4  409.00   45.43
  -3  -9   4  366.56   55.09
   3   9  -3   53.29   14.49
   3   9  -3   41.77   17.41
  -3  -9   3   44.59   18.17
   3   9  -2   79.37   22.19
   3   9  -2   80.24   18.91
  -3  -9   2   54.63   19.40
   3   9  -1  295.03   14.31
   3   9  -1  243.18   28.64
  -3  -9   1  244.44   38.02
   3   9   0   90.44   22.52
   3   9   0   87.84   20.48
  -3  -9   0   92.32   24.09
   3   9   1   50.33   19.55
   3   9   1   65.62   22.71
  -3  -9  -1   73.00   21.39
   3   9   2  108.20   26.43
   3   9   2  129.45   33.00
  -3  -9  -2  115.92   28.76
   3   9   3    6.83    6.47
  -3  -9  -3   13.65    7.96
  -3  -9  -3   27.86   15.75
   3   9   4   65.44   26.16
  -3  -9  -4   48.10   18.95
  -3  -9  -4   38.54   15.22
   3   9   5  139.73   19.80
   3   9   5  206.57   23.94
  -3  -9  -5  111.00   35.69
  -3  -9  -5  161.49   26.38
   3   9   6   46.50   15.22
  -3  -9  -6   23.92   21.91
  -3  -9  -6   54.22   19.68
   3   9   7    4.99    6.04
  -3  -9  -7    7.51    6.81
  -3  -9  -7   44.01   24.10
   3   9   8   24.69   16.88
   3   9   9    6.44    7.75
  -3  -9  -9   39.79   20.95
   3   9  10   10.21    9.83
  -3  -9 -10   35.36   19.81
   3   9  11   -3.33    4.77
  -3  -9 -11   31.92   23.69
  -3  -9 -12  -10.85   13.22
   3  10 -20   13.81    7.83
   3  10 -19    8.72    8.34
   3  10 -18   10.08   17.19
   3  10 -18   13.69    9.98
   3  10 -17   16.69   16.73
   3  10 -17   18.74   13.18
   3  10 -16   10.51    9.31
   3  10 -16   -7.69    8.11
   3  10 -15   19.15   13.44
   3  10 -15   22.91   15.74
   3  10 -14   49.44   21.49
   3  10 -14   34.70   15.82
   3  10 -13   15.93   11.89
   3  10 -13   -5.61    5.84
   3  10 -12   56.58   17.79
   3  10 -12   76.97   19.09
   3  10 -11   27.99   12.82
   3  10 -11   21.93   13.13
  -3 -10  11   18.36   10.92
   3  10 -10   -3.65    7.89
   3  10 -10    2.46    3.35
  -3 -10  10   19.18   11.87
   3  10  -9   76.98   27.79
   3  10  -9   54.72   20.19
  -3 -10   9   80.97   33.29
   3  10  -8   -0.41    9.38
   3  10  -8    4.03    4.55
  -3 -10   8    7.52    6.91
   3  10  -7   23.75   13.07
   3  10  -7   19.97    9.72
  -3 -10   7   31.85   13.68
   3  10  -6  117.70   28.89
  -3 -10   6  112.15   31.27
   3  10  -5  117.04   28.90
   3  10  -5  124.29   32.10
  -3 -10   5   88.50   25.51
   3  10  -4   37.36   15.93
   3  10  -4   36.42   15.81
  -3 -10   4   21.09   11.25
   3  10  -3   97.67   28.87
   3  10  -3  110.67   30.71
  -3 -10   3  108.23   30.17
   3  10  -2   54.92   19.24
   3  10  -2   70.19   24.81
  -3 -10   2   58.78   21.01
   3  10  -1   10.64    7.54
   3  10  -1   26.69   11.83
  -3 -10   1   44.57   19.10
   3  10   0   27.25   14.41
   3  10   0   41.25   15.74
  -3 -10   0   53.67   21.53
   3  10   1  137.12   31.74
   3  10   1  168.50   19.17
  -3 -10  -1  131.47   35.81
   3  10   2    5.93    4.46
   3  10   2    8.53    7.84
  -3 -10  -2    9.27    9.57
   3  10   3   55.39   17.99
  -3 -10  -3   42.09   15.86
   3  10   4   10.10    8.92
  -3 -10  -4   43.46   40.84
   3  10   5   14.28    9.79
   3  10   5   -3.22    8.35
  -3 -10  -5   15.37   13.39
   3  10   6   -1.45    6.58
  -3 -10  -6  -12.44   14.74
   3  10   7    9.93    8.30
  -3 -10  -7   12.61   11.61
   3  10   8    8.05    7.42
  -3 -10  -8    5.22    8.26
   3  10   9   12.43    9.94
  -3 -10  -9   37.82   15.25
   3  10  10   27.53   15.76
  -3 -10 -10   67.24   31.00
  -3 -10 -11   43.49   20.86
   3  11 -19    9.22   10.16
   3  11 -18   23.87   13.98
   3  11 -18    1.68    4.25
   3  11 -17   -5.24   10.98
   3  11 -17  -12.67    7.05
   3  11 -16   61.86   23.98
   3  11 -16   54.71   23.82
   3  11 -15   23.44   19.49
   3  11 -15   36.32   20.19
   3  11 -14   34.95   17.41
   3  11 -14   12.00   10.52
   3  11 -13   29.33   13.16
   3  11 -13   39.47   17.08
   3  11 -12   14.76   11.01
   3  11 -12   11.90    8.82
   3  11 -11   79.01   23.29
   3  11 -11   70.87   17.83
  -3 -11  11   51.70   16.19
   3  11 -10   17.51   11.66
   3  11 -10   21.33   12.62
  -3 -11  10   33.06   17.87
   3  11  -9   79.66   19.73
   3  11  -9   71.99   27.39
  -3 -11   9   31.36   14.61
   3  11  -8   19.16   12.01
   3  11  -8   17.07   11.88
  -3 -11   8   18.94   12.18
   3  11  -7   14.17   11.06
  -3 -11   7   31.28   14.38
   3  11  -6  141.03   33.00
   3  11  -6  151.13   36.19
  -3 -11   6  116.73   27.98
   3  11  -5   10.59    7.82
   3  11  -5   -0.80    4.24
  -3 -11   5   21.87   13.36
   3  11  -4   33.10   16.57
   3  11  -4   67.26   24.85
  -3 -11   4   46.71   18.74
   3  11  -3   19.49   11.31
   3  11  -3   17.66   10.55
  -3 -11   3   44.65   17.45
   3  11  -2   73.48   20.12
   3  11  -2   74.17   18.31
  -3 -11   2   87.19   25.87
   3  11  -1   28.13   13.20
   3  11  -1   32.34   14.50
  -3 -11   1   27.66   15.01
   3  11   0    7.15    6.51
   3  11   0    7.39    6.91
  -3 -11   0   32.07   15.92
   3  11   1   54.16   59.62
   3  11   1  104.98   28.32
  -3 -11  -1   74.19   26.17
   3  11   2   23.53   16.26
  -3 -11  -2   20.56   17.91
   3  11   3   25.69   13.56
  -3 -11  -3   23.44   16.35
   3  11   4   60.57   23.43
  -3 -11  -4   74.06   30.76
   3  11   5   10.11    9.29
   3  11   5    9.16    9.48
  -3 -11  -5   70.46   24.04
   3  11   6   11.03    9.99
  -3 -11  -6  -22.41   14.02
   3  11   7  -10.54    7.29
  -3 -11  -7   35.42   21.00
   3  11   8   -5.59    6.51
  -3 -11  -8    2.98    8.42
   3  11   9   14.95    6.54
  -3 -11  -9   42.82   21.80
   3  11  10    8.66    8.10
  -3 -11 -10   -2.52    9.36
   3  12 -17   17.21   14.56
   3  12 -17   15.01   12.06
   3  12 -16   47.20   19.07
   3  12 -16   24.58   13.04
   3  12 -15   22.22   14.62
   3  12 -15   -2.14    5.86
   3  12 -14    4.58    5.53
   3  12 -13    9.84    8.90
   3  12 -13   13.95   10.25
   3  12 -12   10.47    9.62
   3  12 -12   18.79   12.01
   3  12 -11   24.75   13.71
   3  12 -11   28.96   15.32
  -3 -12  11   27.00   14.00
   3  12 -10  209.48   35.93
   3  12 -10  105.92   29.50
  -3 -12  10  133.06   39.98
   3  12  -9   26.08   13.64
  -3 -12   9   15.93   11.91
   3  12  -8  121.43   30.96
   3  12  -8  161.01   16.27
  -3 -12   8  126.71   32.22
   3  12  -7  298.83   30.14
   3  12  -7  318.33   31.08
  -3 -12   7  362.26   38.09
   3  12  -6   59.90   20.22
   3  12  -6   90.65   24.00
  -3 -12   6   72.13   26.91
   3  12  -5    2.52    4.40
   3  12  -5   -4.39    8.59
  -3 -12   5  -15.10   11.59
   3  12  -4  101.08   29.69
   3  12  -4  125.80   32.07
  -3 -12   4   83.76   25.21
   3  12  -3   -1.42    5.29
   3  12  -3   29.84   15.12
  -3 -12   3   19.75   12.06
   3  12  -2   34.06   16.05
   3  12  -2   21.00   11.74
  -3 -12   2   49.25   19.65
   3  12  -1   58.72   20.56
   3  12  -1   59.95   19.84
  -3 -12   1   42.84   19.36
   3  12   0    6.19    7.63
  -3 -12   0   26.32   14.66
   3  12   1   62.61   21.50
  -3 -12  -1   25.42   15.17
   3  12   2  -11.72    9.17
  -3 -12  -2  -10.81   14.95
   3  12   3   33.14   17.57
  -3 -12  -3   70.24   24.36
   3  12   4   43.11   23.39
  -3 -12  -4   53.03   20.16
   3  12   5   27.42   16.56
   3  12   5   24.52   25.87
  -3 -12  -5   83.62   33.01
   3  12   6   -4.03    7.11
  -3 -12  -6   13.12   14.16
   3  12   7   22.40   13.95
  -3 -12  -7   41.36   21.01
   3  12   8   -7.28    5.03
  -3 -12  -8   39.13   20.09
   3  12   9   15.80    9.48
   3  13 -17    6.15    8.59
   3  13 -16   -9.22    9.93
   3  13 -15   -7.94    9.80
   3  13 -14   -4.46    8.50
   3  13 -13   31.39   17.56
   3  13 -12   20.97   14.54
   3  13 -11   19.06   14.50
  -3 -13  11   14.98   11.69
   3  13 -10   -8.09    7.47
   3  13 -10    7.82    7.41
  -3 -13  10   15.51   12.91
   3  13  -9    4.47    5.89
   3  13  -9   26.23   14.57
  -3 -13   9   22.34   13.19
   3  13  -8   16.04   11.86
   3  13  -8   19.61   10.97
  -3 -13   8   36.07   21.81
   3  13  -7    5.80    7.71
   3  13  -7   14.28   10.25
  -3 -13   7   -1.02    6.86
   3  13  -6    3.09    3.59
   3  13  -6    8.02   10.02
  -3 -13   6   23.49   18.18
   3  13  -5    1.56    4.43
   3  13  -5    8.39    7.67
  -3 -13   5   13.61    9.86
   3  13  -4   21.58   16.52
   3  13  -4   36.12   15.32
  -3 -13   4   51.51   19.65
   3  13  -3   -2.01    4.96
   3  13  -3   12.48    8.59
  -3 -13   3    9.66   10.82
   3  13  -2    8.24    8.61
   3  13  -2   22.74   13.12
  -3 -13   2  -29.58   13.36
   3  13  -1  132.49   21.47
  -3 -13   1   80.12   30.36
   3  13   0   13.61   10.65
  -3 -13   0   13.81   11.99
   3  13   1   29.35   15.22
  -3 -13  -1  -15.86   14.74
   3  13   2   75.60   19.64
  -3 -13  -2   29.38   20.33
   3  13   3   18.63    9.19
  -3 -13  -3   -1.36   16.46
   3  13   4   -8.09    9.23
  -3 -13  -4   34.48   16.73
   3  13   5   27.58   15.50
  -3 -13  -5   44.19   17.25
   3  13   6    5.95    6.61
  -3 -13  -6   21.26   14.90
   3  13   7   -3.42    5.32
   3  13   8    2.03    3.82
   3  14 -16   36.88   16.70
   3  14 -15   37.33   18.23
   3  14 -14   75.11   29.15
   3  14 -13   10.08   10.65
   3  14 -12    5.91    6.62
   3  14 -11    9.05   13.67
   3  14 -11   29.71   17.76
   3  14 -10   34.15   16.96
   3  14 -10   37.96   18.82
  -3 -14  10   22.35   15.58
   3  14  -9   21.77   14.99
   3  14  -9   27.44   15.57
  -3 -14   9   35.65   19.23
   3  14  -8   18.32   12.19
   3  14  -8   13.42   10.87
  -3 -14   8   31.64   15.01
   3  14  -7   25.36   17.38
   3  14  -7   26.50   17.56
  -3 -14   7   16.24   12.52
   3  14  -6    9.53    9.36
   3  14  -6    0.17    4.85
  -3 -14   6   32.64   18.56
   3  14  -5   19.69   13.00
   3  14  -5   27.67   12.96
  -3 -14   5    5.77   14.07
   3  14  -4   34.89   18.64
   3  14  -4   44.07   20.02
  -3 -14   4   49.79   21.66
   3  14  -3  -18.37    9.37
  -3 -14   3    7.98   11.83
   3  14  -2    6.49    7.63
  -3 -14   2   24.53   20.13
   3  14  -1   10.21    8.97
  -3 -14   1   71.10   23.77
   3  14   0   54.00   25.25
  -3 -14   0   24.75   17.55
   3  14   1   22.42   14.20
  -3 -14  -1   41.66   22.39
   3  14   2    1.61    5.17
  -3 -14  -2   33.57   16.44
   3  14   3   42.05   17.28
  -3 -14  -3   27.16   16.01
   3  14   4   34.87   17.83
   3  14   4   42.44   20.36
  -3 -14  -4    2.96   10.37
  -3 -14  -5   26.47   14.60
   3  14   6   11.63   10.16
   3  15 -16   -0.99    8.09
   3  15 -15   22.72   13.24
   3  15 -15    3.38    4.72
   3  15 -14   19.93   12.16
   3  15 -14   16.40   13.49
   3  15 -13    4.25    7.23
   3  15 -13   -6.57    8.90
   3  15 -12   32.58   17.38
   3  15 -12   44.64   18.40
   3  15 -11   49.57   24.21
   3  15 -11   90.57   32.12
   3  15 -10  -11.20    7.46
   3  15 -10    6.85    6.85
  -3 -15  10    2.98    5.51
   3  15  -9    7.05    7.94
   3  15  -9   30.85   16.99
  -3 -15   9   15.54   11.48
   3  15  -8   11.78   12.24
   3  15  -8   28.36   16.41
[truncated: 514,710 more chars]
